# Supplementary material for: Allele-specific gene expression can underlie altered transcript abundance in zebrafish mutants
Source: eLife. 2022 Feb 17;11:e72825. doi: 10.7554/eLife.72825 (PMC8884726; doi:10.7554/eLife.72825)
Supplement: Figure 2—source data 2. — Number of DE genes for each experiment and whether the mutant chromosome shows an enrichment of DE genes. [file elife-72825-fig2-data2.xlsx]

## Sheet: fig1-source-data-2
expt_name	gene_name	gene_id	mut_chr	sig_genes	pval	padj	enriched
capzb1_hi1858bTg	capzb	ENSDARG00000100252	22	160	0.000284101	0.00710253	TRUE
dnmt8	dnmt3aa	ENSDARG00000005394	20	18	0.000401604	0.0100401	TRUE
ffr	vps51	ENSDARG00000062016	10	1119	4.05167e-07	1.01292e-05	TRUE
gmds_p31erb	gmds	ENSDARG00000026629	20	116	0.514403	1	FALSE
hesx1		ENSDARG00000060734	11	1780	0.41528	1	FALSE
mitfa_w2	mitfa	ENSDARG00000003732	6	41	0.00221442	0.0553605	FALSE
sox10_baz1	sox10	ENSDARG00000077467	3	78	0.05923	1	FALSE
sox10_t3_1	sox10	ENSDARG00000077467	3	59	4.2459e-05	0.00106148	TRUE
sox10_t3_2	sox10	ENSDARG00000077467	3	103	0.00274114	0.0685284	FALSE
sox10_t3_3	sox10	ENSDARG00000077467	3	126	0.00625878	0.156469	FALSE
sox10_t3_4	sox10	ENSDARG00000077467	3	1444	0.00121151	0.0302877	TRUE
sox10_t3_baz1_28hpf	sox10	ENSDARG00000077467	3	147	0.000289817	0.00724544	TRUE
sox10_t3_baz1_36hpf	sox10	ENSDARG00000077467	3	301	0.00020868	0.00521699	TRUE
tcf7l1a_m881	tcf7l1a	ENSDARG00000038159	10	42	0.000100372	0.00250931	TRUE
zmp_ph1	cep192	ENSDARG00000104831	16	326	0.00992434	0.248108	FALSE
zmp_ph10	tfip11	ENSDARG00000056932	23	3368	0.103566	1	FALSE
zmp_ph108	kdm2aa	ENSDARG00000059653	1	220	0.000178172	0.0044543	TRUE
zmp_ph11	ptf1a	ENSDARG00000014479	2	761	0.147288	1	FALSE
zmp_ph111	kdm2aa	ENSDARG00000059653	1	431	0.00245254	0.0613134	FALSE
zmp_ph114	kdm2aa	ENSDARG00000059653	1	297	0.183736	1	FALSE
zmp_ph12	rpl13	ENSDARG00000099380	7	7679	0.185798	1	FALSE
zmp_ph13	ttna	ENSDARG00000028213	9	263	1.347e-09	3.36749e-08	TRUE
zmp_ph14	nup88	ENSDARG00000003235	5	3805	0.596951	1	FALSE
zmp_ph15	CYFIP2	ENSDARG00000036375	14	68	0.0986884	1	FALSE
zmp_ph150	sox10	ENSDARG00000077467	3	7	0.0604207	1	FALSE
zmp_ph151	mitfa	ENSDARG00000003732	6	7	3.31354e-06	8.28385e-05	TRUE
zmp_ph152	sox10	ENSDARG00000077467	3	40	0.00237386	0.0593464	FALSE
zmp_ph155_kitlga	kitlga	ENSDARG00000070917	25	4	0.115549	1	FALSE
zmp_ph155_mitfa	mitfa	ENSDARG00000003732	6	42	0.00220195	0.0550486	FALSE
zmp_ph16	nol9	ENSDARG00000077751	23	1799	0.003954	0.0988501	FALSE
zmp_ph162	tfap2a	ENSDARG00000059279	24	71	0.0313322	0.783304	FALSE
zmp_ph163	mitfa	ENSDARG00000003732	6	116	2.4605e-33	6.15124e-32	TRUE
zmp_ph170	bace2	ENSDARG00000044781	15	22	0.00306805	0.0767013	FALSE
zmp_ph172	bace2	ENSDARG00000044781	15	3	1	1	FALSE
zmp_ph175	pcna	ENSDARG00000054155	10	31	0.296357	1	FALSE
zmp_ph18	cacna1c	ENSDARG00000008398	4	1111	0.668439	1	FALSE
zmp_ph180	pax2a	ENSDARG00000028148	13	8	5.64265e-06	0.000141066	TRUE
zmp_ph181	pax2a	ENSDARG00000028148	13	29	0.025808	0.6452	FALSE
zmp_ph184	ercc3	ENSDARG00000002402	6	316	0.000803984	0.0200996	TRUE
zmp_ph185	cax1	ENSDARG00000045601	4	8	0.0269386	0.673464	FALSE
zmp_ph188	dmd	ENSDARG00000008487	1	40	1.04725e-06	2.61814e-05	TRUE
zmp_ph19	ttna	ENSDARG00000028213	9	2162	0.0395601	0.989003	FALSE
zmp_ph192_tfap2a	tfap2a	ENSDARG00000059279	24	2	1	1	FALSE
zmp_ph192_tfap2c	tfap2c	ENSDARG00000040606	6	1	0.0430932	1	FALSE
zmp_ph193	lamb2	ENSDARG00000002084	23	35	6.31955e-06	0.000157989	TRUE
zmp_ph194	lamb2	ENSDARG00000002084	23	120	0.0588387	1	FALSE
zmp_ph195	tmod4	ENSDARG00000020890	16	115	0.022959	0.573974	FALSE
zmp_ph196	dmd	ENSDARG00000008487	1	280	0.0277318	0.693296	FALSE
zmp_ph197	sne	ENSDARG00000056090	8	57	6.58508e-32	1.64627e-30	TRUE
zmp_ph198	sox10	ENSDARG00000077467	3	54	0.000108262	0.00270656	TRUE
zmp_ph199	tmod4	ENSDARG00000020890	16	284	0.000820136	0.0205034	TRUE
zmp_ph2	slc2a11b	ENSDARG00000063288	5	22	7.41476e-09	1.85369e-07	TRUE
zmp_ph20	las1l	ENSDARG00000062457	5	109	0.530709	1	FALSE
zmp_ph200	sne	ENSDARG00000056090	8	167	0.0029837	0.0745926	FALSE
zmp_ph202	hsp90aa1.1	ENSDARG00000010478	20	108	0.168272	1	FALSE
zmp_ph203	hsp90aa1.1	ENSDARG00000010478	20	480	0.121554	1	FALSE
zmp_ph204	dag1	ENSDARG00000016153	22	127	0.00120454	0.0301136	TRUE
zmp_ph205	dag1	ENSDARG00000016153	22	504	5.00212e-07	1.25053e-05	TRUE
zmp_ph206	bmp7a	ENSDARG00000018260	11	1037	0.00080577	0.0201442	TRUE
zmp_ph211	neb	ENSDARG00000032630	9	42	0.000615998	0.0154	TRUE
zmp_ph212	neb/buf	ENSDARG00000032630	9	79	0.000520553	0.0130138	TRUE
zmp_ph213	neb	ENSDARG00000032630	9	464	0.268898	1	FALSE
zmp_ph214	neb/buf	ENSDARG00000032630	9	332	4.78716e-05	0.00119679	TRUE
zmp_ph215	ryr1	ENSDARG00000023797	18	795	0.447216	1	FALSE
zmp_ph216	ryr1	ENSDARG00000023797	18	28	0.0024987	0.0624676	FALSE
zmp_ph219	ryr1	ENSDARG00000023797	18	24	0.00723351	0.180838	FALSE
zmp_ph220	ryr1	ENSDARG00000023797	18	3442	0.0789344	1	FALSE
zmp_ph23	top1l	ENSDARG00000070545	11	528	0.0957966	1	FALSE
zmp_ph231	SRPK3	ENSDARG00000005916	8	6	4.01233e-05	0.00100308	TRUE
zmp_ph232	SRPK3	ENSDARG00000005916	8	406	0.00240299	0.0600747	FALSE
zmp_ph234	yap1	ENSDARG00000068401	18	23	1.29953e-09	3.24883e-08	TRUE
zmp_ph235	yap1	ENSDARG00000068401	18	53	6.65861e-21	1.66465e-19	TRUE
zmp_ph238_tfap2a	tfap2a	ENSDARG00000059279	24	17	0.0739239	1	FALSE
zmp_ph238_tfap2c	tfap2c	ENSDARG00000040606	6	5	0.208553	1	FALSE
zmp_ph239	yap1	ENSDARG00000068401	18	67	1.65476e-20	4.1369e-19	TRUE
zmp_ph25	nol9	ENSDARG00000077751	23	350	0.444845	1	FALSE
zmp_ph250_tfap2a	tfap2a	ENSDARG00000059279	24	6	0.0114941	0.287352	FALSE
zmp_ph250_tfap2c	tfap2c	ENSDARG00000040606	6	7	1	1	FALSE
zmp_ph255	ldlr	ENSDARG00000029476	3	94	0.867803	1	FALSE
zmp_ph258	sox10	ENSDARG00000077467	3	3	0.000171389	0.00428473	TRUE
zmp_ph27	ttna	ENSDARG00000028213	9	612	3.75517e-06	9.38792e-05	TRUE
zmp_ph29	ttna	ENSDARG00000028213	9	824	2.7405e-05	0.000685126	TRUE
zmp_ph3	bmp7a	ENSDARG00000018260	11	654	0.079662	1	FALSE
zmp_ph31	nup88	ENSDARG00000003235	5	2044	0.586852	1	FALSE
zmp_ph32	si:ch211-168k14.2	ENSDARG00000056191	9	121	0.615979	1	FALSE
zmp_ph35	vps16	ENSDARG00000059902	6	83	3.52934e-08	8.82335e-07	TRUE
zmp_ph4	polr1a	ENSDARG00000098375	14	1283	0.000734117	0.0183529	TRUE
zmp_ph40	smarce1	ENSDARG00000016871	3	186	0.0984362	1	FALSE
zmp_ph42	meis1	ENSDARG00000012078	13	100	0.51472	1	FALSE
zmp_ph44	CDAN1	ENSDARG00000042261	17	372	0.00444661	0.111165	FALSE
zmp_ph45	pla2g12b	ENSDARG00000015662	13	17	0.0311261	0.778154	FALSE
zmp_ph46	GPAA1	ENSDARG00000074571	2	449	0.233401	1	FALSE
zmp_ph48	rps24	ENSDARG00000039347	13	4340	0.0934121	1	FALSE
zmp_ph5	GREB1	ENSDARG00000070794	17	98	0.223294	1	FALSE
zmp_ph51	slc22a7b	ENSDARG00000056643	17	238	7.51461e-17	1.87865e-15	TRUE
zmp_ph54	megf10	ENSDARG00000017229	10	4605	0.154435	1	FALSE
zmp_ph55	dhx15	ENSDARG00000015392	7	3501	0.000638186	0.0159546	TRUE
zmp_ph56	copb1	ENSDARG00000056557	7	601	2.55827e-06	6.39567e-05	TRUE
zmp_ph58	CLP1	ENSDARG00000063663	14	3142	0.434162	1	FALSE
zmp_ph6	nol9	ENSDARG00000077751	23	656	0.0181115	0.452787	FALSE
zmp_ph69	ttnb	ENSDARG00000000563	9	632	0.0061802	0.154505	FALSE
zmp_ph7	lamc1	ENSDARG00000036279	2	237	0.322312	1	FALSE
zmp_ph71	nod2	ENSDARG00000010756	7	139	0.0003248	0.00811999	TRUE
zmp_ph77	glra1	ENSDARG00000012019	14	715	8.77827e-06	0.000219457	TRUE
zmp_ph78	ryr1	ENSDARG00000023797	18	22	3.62272e-06	9.0568e-05	TRUE
zmp_ph8	PLD1	ENSDARG00000057125	24	12	1	1	FALSE
zmp_ph80	ryr1	ENSDARG00000023797	18	815	0.00026196	0.00654901	TRUE
zmp_ph86	kdm2aa	ENSDARG00000059653	1	53	0.212306	1	FALSE
zmp_ph87	dnmt3aa	ENSDARG00000005394	20	424	0.125439	1	FALSE
zmp_ph88	dnmt3bb.1	ENSDARG00000036791	23	48	8.65876e-43	2.16469e-41	TRUE
zmp_ph9	MDN1	ENSDARG00000008976	20	2574	0.0906097	1	FALSE
zmp_ph90	dnmt3ba	ENSDARG00000052402	8	16	3.56596e-05	0.000891491	TRUE
zmp_ph97	kdm2aa	ENSDARG00000059653	1	260	0.0163817	0.409543	FALSE
zmp_ph98	kdm2aa	ENSDARG00000059653	1	186	0.00338908	0.0847269	FALSE
