# Supplementary material for: Allele-specific gene expression can underlie altered transcript abundance in zebrafish mutants
Source: eLife. 2022 Feb 17;11:e72825. doi: 10.7554/eLife.72825 (PMC8884726; doi:10.7554/eLife.72825)
Supplement: Figure 2—source data 3. — Normalised counts for si:ch73-308m11.1 (ENSDARG00000039752) in sox10 t3/baz1 incross at Prim-5 (24 hr post-fertilisation [hpf]). [file elife-72825-fig2-data3.xlsx]

## Sheet: fig1-source-data-3
sample	condition	normalised_count
zmp_ph198_A11	wt_t3_wt_baz1	46.6426
zmp_ph198_A4	wt_t3_wt_baz1	38.8079
zmp_ph198_A5	wt_t3_wt_baz1	37.6923
zmp_ph198_A7	wt_t3_wt_baz1	58.0629
zmp_ph198_B6	wt_t3_wt_baz1	55.482
zmp_ph198_C11	wt_t3_wt_baz1	46.7612
zmp_ph198_C1	wt_t3_wt_baz1	35.4052
zmp_ph198_C2	wt_t3_wt_baz1	28.8734
zmp_ph198_C4	wt_t3_wt_baz1	48.5186
zmp_ph198_D1	wt_t3_wt_baz1	57.2132
zmp_ph198_D2	wt_t3_wt_baz1	28.0297
zmp_ph198_D3	wt_t3_wt_baz1	68.3413
zmp_ph198_A3	het_t3_wt_baz1	51.1765
zmp_ph198_B10	het_t3_wt_baz1	44.9143
zmp_ph198_B11	het_t3_wt_baz1	40.585
zmp_ph198_B2	het_t3_wt_baz1	54.3791
zmp_ph198_B8	het_t3_wt_baz1	34.9574
zmp_ph198_B9	het_t3_wt_baz1	41.8317
zmp_ph198_C5	het_t3_wt_baz1	35.6223
zmp_ph198_C8	het_t3_wt_baz1	43.6737
zmp_ph198_D11	het_t3_wt_baz1	26.311
zmp_ph198_D7	het_t3_wt_baz1	41.5288
zmp_ph198_E2	het_t3_wt_baz1	51.1899
zmp_ph198_E4	het_t3_wt_baz1	36.2929
zmp_ph198_A9	wt_t3_het_baz1	36.388
zmp_ph198_B4	wt_t3_het_baz1	26.8837
zmp_ph198_B5	wt_t3_het_baz1	21.2941
zmp_ph198_C6	wt_t3_het_baz1	35.1327
zmp_ph198_D4	wt_t3_het_baz1	34.9088
zmp_ph198_D6	wt_t3_het_baz1	23.9054
zmp_ph198_D8	wt_t3_het_baz1	7.47911
zmp_ph198_E11	wt_t3_het_baz1	16.6402
zmp_ph198_E12	wt_t3_het_baz1	28.0567
zmp_ph198_E3	wt_t3_het_baz1	25.7592
zmp_ph198_E6	wt_t3_het_baz1	39.2826
zmp_ph198_F1	wt_t3_het_baz1	17.228
zmp_ph198_A10	het_t3_het_baz1	11.0857
zmp_ph198_A6	het_t3_het_baz1	30.8351
zmp_ph198_A8	het_t3_het_baz1	22.55
zmp_ph198_B3	het_t3_het_baz1	21.8191
zmp_ph198_B7	het_t3_het_baz1	18.6167
zmp_ph198_C10	het_t3_het_baz1	20.2078
zmp_ph198_C3	het_t3_het_baz1	12.5719
zmp_ph198_C9	het_t3_het_baz1	31.3787
zmp_ph198_D10	het_t3_het_baz1	21.6738
zmp_ph198_D12	het_t3_het_baz1	19.267
zmp_ph198_D5	het_t3_het_baz1	29.4504
zmp_ph198_D9	het_t3_het_baz1	19.0988
