# Supplementary material for: Allele-specific gene expression can underlie altered transcript abundance in zebrafish mutants
Source: eLife. 2022 Feb 17;11:e72825. doi: 10.7554/eLife.72825 (PMC8884726; doi:10.7554/eLife.72825)
Supplement: Figure 3—source data 1. [file elife-72825-fig3-data1.xlsx]

## Sheet: fig3-source-data-1
chr	start	end	sample	haplotype
5	1	1000000	SAT_5	AB/AB
5	1	1000000	SAT_6	AB/AB
5	1	1000000	A1	AB/AB
5	1	1000000	A2	AB/AB
5	1	1000000	A3	AB/AB
5	1	1000000	A4	AB/AB
5	1	1000000	A5	AB/AB
5	1	1000000	A6	AB/AB
5	1	1000000	A7	AB/AB
5	1	1000000	A8	AB/AB
5	1	1000000	A9	AB/AB
5	1	1000000	A10	AB/AB
5	1	1000000	A11	AB/AB
5	1	1000000	A12	AB/AB
5	1	1000000	B1	AB/AB
5	1	1000000	B2	AB/AB
5	1	1000000	B3	AB/AB
5	1	1000000	B4	AB/AB
5	1	1000000	B5	AB/AB
5	1	1000000	B6	AB/AB
5	1	1000000	B7	AB/AB
5	1	1000000	B8	AB/AB
5	1	1000000	B9	AB/AB
5	1	1000000	B10	AB/AB
5	1	1000000	B11	AB/AB
5	1	1000000	B12	AB/AB
5	1	1000000	C1	AB/AB
5	1	1000000	C2	AB/AB
5	1	1000000	C3	AB/AB
5	1	1000000	C4	AB/AB
5	1	1000000	C5	AB/AB
5	1	1000000	C6	AB/AB
5	1	1000000	C7	AB/AB
5	1	1000000	C8	AB/AB
5	1	1000000	C9	AB/AB
5	1	1000000	C10	AB/AB
5	1	1000000	C11	AB/AB
5	1	1000000	C12	AB/AB
5	1	1000000	D1	AB/AB
5	1	1000000	D2	AB/AB
5	1	1000000	D3	AB/AB
5	1	1000000	D4	AB/AB
5	1	1000000	D5	AB/AB
5	1	1000000	D6	AB/AB
5	1	1000000	D7	AB/AB
5	1	1000000	D8	AB/AB
5	1	1000000	D9	AB/AB
5	1	1000000	D10	AB/AB
5	1	1000000	D11	AB/AB
5	1	1000000	D12	AB/AB
5	1	1000000	E1	AB/AB
5	1	1000000	E2	AB/AB
5	1	1000000	E3	AB/AB
5	1	1000000	E4	AB/AB
5	1	1000000	E5	AB/AB
5	1	1000000	E6	AB/AB
5	1	1000000	E7	AB/AB
5	1	1000000	E8	AB/AB
5	1	1000000	E9	AB/AB
5	1	1000000	E10	AB/AB
5	1	1000000	E11	AB/AB
5	1	1000000	E12	AB/AB
5	1	1000000	F1	AB/AB
5	1	1000000	F2	AB/AB
5	1	1000000	F3	AB/AB
5	1	1000000	F4	AB/AB
5	1	1000000	F5	AB/AB
5	1	1000000	F6	AB/AB
5	1	1000000	F7	AB/AB
5	1	1000000	F8	AB/AB
5	1	1000000	F9	AB/AB
5	1	1000000	F10	AB/AB
5	1	1000000	F11	AB/AB
5	1	1000000	F12	AB/AB
5	1	1000000	G1	AB/AB
5	1	1000000	G2	AB/AB
5	1	1000000	G3	AB/AB
5	1	1000000	G4	AB/AB
5	1	1000000	G5	AB/AB
5	1	1000000	G6	AB/AB
5	1	1000000	G7	AB/AB
5	1	1000000	G8	AB/AB
5	1	1000000	G9	AB/AB
5	1	1000000	G10	AB/AB
5	1	1000000	G11	AB/AB
5	1	1000000	G12	AB/AB
5	1	1000000	H1	AB/AB
5	1	1000000	H2	AB/AB
5	1	1000000	H3	AB/AB
5	1	1000000	H4	AB/AB
5	1	1000000	H5	AB/AB
5	1	1000000	H6	AB/AB
5	1	1000000	H7	AB/AB
5	1	1000000	H8	AB/AB
5	1	1000000	H9	AB/AB
5	1	1000000	H10	AB/AB
5	1	1000000	H11	AB/AB
5	1	1000000	H12	AB/AB
5	1000001	2000000	SAT_5	AB/AB
5	1000001	2000000	SAT_6	AB/AB
5	1000001	2000000	A1	AB/AB
5	1000001	2000000	A2	AB/AB
5	1000001	2000000	A3	AB/AB
5	1000001	2000000	A4	AB/AB
5	1000001	2000000	A5	AB/AB
5	1000001	2000000	A6	AB/AB
5	1000001	2000000	A7	AB/AB
5	1000001	2000000	A8	AB/AB
5	1000001	2000000	A9	AB/AB
5	1000001	2000000	A10	AB/AB
5	1000001	2000000	A11	AB/AB
5	1000001	2000000	A12	AB/AB
5	1000001	2000000	B1	AB/AB
5	1000001	2000000	B2	AB/AB
5	1000001	2000000	B3	AB/AB
5	1000001	2000000	B4	AB/AB
5	1000001	2000000	B5	AB/AB
5	1000001	2000000	B6	AB/AB
5	1000001	2000000	B7	AB/AB
5	1000001	2000000	B8	AB/AB
5	1000001	2000000	B9	AB/AB
5	1000001	2000000	B10	AB/AB
5	1000001	2000000	B11	AB/AB
5	1000001	2000000	B12	AB/AB
5	1000001	2000000	C1	AB/AB
5	1000001	2000000	C2	AB/AB
5	1000001	2000000	C3	AB/AB
5	1000001	2000000	C4	AB/AB
5	1000001	2000000	C5	AB/AB
5	1000001	2000000	C6	AB/AB
5	1000001	2000000	C7	AB/AB
5	1000001	2000000	C8	AB/AB
5	1000001	2000000	C9	AB/AB
5	1000001	2000000	C10	AB/AB
5	1000001	2000000	C11	AB/AB
5	1000001	2000000	C12	AB/AB
5	1000001	2000000	D1	AB/AB
5	1000001	2000000	D2	AB/AB
5	1000001	2000000	D3	AB/AB
5	1000001	2000000	D4	AB/AB
5	1000001	2000000	D5	AB/AB
5	1000001	2000000	D6	AB/AB
5	1000001	2000000	D7	AB/AB
5	1000001	2000000	D8	AB/AB
5	1000001	2000000	D9	AB/AB
5	1000001	2000000	D10	AB/AB
5	1000001	2000000	D11	AB/AB
5	1000001	2000000	D12	AB/AB
5	1000001	2000000	E1	AB/AB
5	1000001	2000000	E2	AB/AB
5	1000001	2000000	E3	AB/AB
5	1000001	2000000	E4	AB/AB
5	1000001	2000000	E5	AB/AB
5	1000001	2000000	E6	AB/AB
5	1000001	2000000	E7	AB/AB
5	1000001	2000000	E8	AB/AB
5	1000001	2000000	E9	AB/AB
5	1000001	2000000	E10	AB/AB
5	1000001	2000000	E11	AB/AB
5	1000001	2000000	E12	AB/AB
5	1000001	2000000	F1	AB/AB
5	1000001	2000000	F2	AB/AB
5	1000001	2000000	F3	AB/AB
5	1000001	2000000	F4	AB/AB
5	1000001	2000000	F5	AB/AB
5	1000001	2000000	F6	AB/AB
5	1000001	2000000	F7	AB/AB
5	1000001	2000000	F8	AB/AB
5	1000001	2000000	F9	AB/AB
5	1000001	2000000	F10	AB/AB
5	1000001	2000000	F11	AB/AB
5	1000001	2000000	F12	AB/AB
5	1000001	2000000	G1	AB/AB
5	1000001	2000000	G2	AB/AB
5	1000001	2000000	G3	AB/AB
5	1000001	2000000	G4	AB/AB
5	1000001	2000000	G5	AB/AB
5	1000001	2000000	G6	AB/AB
5	1000001	2000000	G7	AB/AB
5	1000001	2000000	G8	AB/AB
5	1000001	2000000	G9	AB/AB
5	1000001	2000000	G10	AB/AB
5	1000001	2000000	G11	AB/AB
5	1000001	2000000	G12	AB/AB
5	1000001	2000000	H1	AB/AB
5	1000001	2000000	H2	AB/AB
5	1000001	2000000	H3	AB/AB
5	1000001	2000000	H4	AB/AB
5	1000001	2000000	H5	AB/AB
5	1000001	2000000	H6	AB/AB
5	1000001	2000000	H7	AB/AB
5	1000001	2000000	H8	AB/AB
5	1000001	2000000	H9	AB/AB
5	1000001	2000000	H10	AB/AB
5	1000001	2000000	H11	AB/AB
5	1000001	2000000	H12	AB/AB
5	2000001	3000000	SAT_5	Tu/Tu
5	2000001	3000000	SAT_6	Tu/Tu
5	2000001	3000000	A1	Tu/Tu
5	2000001	3000000	A2	Tu/Tu
5	2000001	3000000	A3	Tu/Tu
5	2000001	3000000	A4	Tu/Tu
5	2000001	3000000	A5	Tu/Tu
5	2000001	3000000	A6	Tu/Tu
5	2000001	3000000	A7	Tu/Tu
5	2000001	3000000	A8	Tu/Tu
5	2000001	3000000	A9	Tu/Tu
5	2000001	3000000	A10	Tu/Tu
5	2000001	3000000	A11	Tu/Tu
5	2000001	3000000	A12	Tu/Tu
5	2000001	3000000	B1	Tu/Tu
5	2000001	3000000	B2	Tu/Tu
5	2000001	3000000	B3	Tu/Tu
5	2000001	3000000	B4	Tu/Tu
5	2000001	3000000	B5	Tu/Tu
5	2000001	3000000	B6	Tu/Tu
5	2000001	3000000	B7	Tu/Tu
5	2000001	3000000	B8	Tu/Tu
5	2000001	3000000	B9	Tu/Tu
5	2000001	3000000	B10	Tu/Tu
5	2000001	3000000	B11	Tu/Tu
5	2000001	3000000	B12	Tu/Tu
5	2000001	3000000	C1	Tu/Tu
5	2000001	3000000	C2	Tu/Tu
5	2000001	3000000	C3	Tu/Tu
5	2000001	3000000	C4	Tu/Tu
5	2000001	3000000	C5	Tu/Tu
5	2000001	3000000	C6	Tu/Tu
5	2000001	3000000	C7	Tu/Tu
5	2000001	3000000	C8	Tu/Tu
5	2000001	3000000	C9	Tu/Tu
5	2000001	3000000	C10	Tu/Tu
5	2000001	3000000	C11	Tu/Tu
5	2000001	3000000	C12	Tu/Tu
5	2000001	3000000	D1	Tu/Tu
5	2000001	3000000	D2	Tu/Tu
5	2000001	3000000	D3	Tu/Tu
5	2000001	3000000	D4	Tu/Tu
5	2000001	3000000	D5	Tu/Tu
5	2000001	3000000	D6	Tu/Tu
5	2000001	3000000	D7	Tu/Tu
5	2000001	3000000	D8	Tu/Tu
5	2000001	3000000	D9	Tu/Tu
5	2000001	3000000	D10	Tu/Tu
5	2000001	3000000	D11	Tu/Tu
5	2000001	3000000	D12	Tu/Tu
5	2000001	3000000	E1	Tu/Tu
5	2000001	3000000	E2	Tu/Tu
5	2000001	3000000	E3	Tu/Tu
5	2000001	3000000	E4	Tu/Tu
5	2000001	3000000	E5	Tu/Tu
5	2000001	3000000	E6	Tu/Tu
5	2000001	3000000	E7	Tu/Tu
5	2000001	3000000	E8	Tu/Tu
5	2000001	3000000	E9	Tu/Tu
5	2000001	3000000	E10	Tu/Tu
5	2000001	3000000	E11	Tu/Tu
5	2000001	3000000	E12	Tu/Tu
5	2000001	3000000	F1	Tu/Tu
5	2000001	3000000	F2	Tu/Tu
5	2000001	3000000	F3	Tu/Tu
5	2000001	3000000	F4	Tu/Tu
5	2000001	3000000	F5	Tu/Tu
5	2000001	3000000	F6	Tu/Tu
5	2000001	3000000	F7	Tu/Tu
5	2000001	3000000	F8	Tu/Tu
5	2000001	3000000	F9	Tu/Tu
5	2000001	3000000	F10	Tu/Tu
5	2000001	3000000	F11	Tu/Tu
5	2000001	3000000	F12	Tu/Tu
5	2000001	3000000	G1	Tu/Tu
5	2000001	3000000	G2	Tu/Tu
5	2000001	3000000	G3	Tu/Tu
5	2000001	3000000	G4	Tu/Tu
5	2000001	3000000	G5	Tu/Tu
5	2000001	3000000	G6	Tu/Tu
5	2000001	3000000	G7	Tu/Tu
5	2000001	3000000	G8	Tu/Tu
5	2000001	3000000	G9	Tu/Tu
5	2000001	3000000	G10	Tu/Tu
5	2000001	3000000	G11	Tu/Tu
5	2000001	3000000	G12	Tu/Tu
5	2000001	3000000	H1	Tu/Tu
5	2000001	3000000	H2	Tu/Tu
5	2000001	3000000	H3	Tu/Tu
5	2000001	3000000	H4	Tu/Tu
5	2000001	3000000	H5	Tu/Tu
5	2000001	3000000	H6	Tu/Tu
5	2000001	3000000	H7	Tu/Tu
5	2000001	3000000	H8	Tu/Tu
5	2000001	3000000	H9	Tu/Tu
5	2000001	3000000	H10	Tu/Tu
5	2000001	3000000	H11	Tu/Tu
5	2000001	3000000	H12	Tu/Tu
5	3000001	4000000	SAT_5	Tu/Tu
5	3000001	4000000	SAT_6	Tu/Tu
5	3000001	4000000	A1	Tu/Tu
5	3000001	4000000	A2	Tu/Tu
5	3000001	4000000	A3	Tu/Tu
5	3000001	4000000	A4	Tu/Tu
5	3000001	4000000	A5	Tu/Tu
5	3000001	4000000	A6	Tu/Tu
5	3000001	4000000	A7	Tu/Tu
5	3000001	4000000	A8	Tu/Tu
5	3000001	4000000	A9	Tu/Tu
5	3000001	4000000	A10	Tu/Tu
5	3000001	4000000	A11	Tu/Tu
5	3000001	4000000	A12	Tu/Tu
5	3000001	4000000	B1	Tu/Tu
5	3000001	4000000	B2	Tu/Tu
5	3000001	4000000	B3	Tu/Tu
5	3000001	4000000	B4	Tu/Tu
5	3000001	4000000	B5	Tu/Tu
5	3000001	4000000	B6	Tu/Tu
5	3000001	4000000	B7	Tu/Tu
5	3000001	4000000	B8	Tu/Tu
5	3000001	4000000	B9	Tu/Tu
5	3000001	4000000	B10	Tu/Tu
5	3000001	4000000	B11	Tu/Tu
5	3000001	4000000	B12	Tu/Tu
5	3000001	4000000	C1	Tu/Tu
5	3000001	4000000	C2	Tu/Tu
5	3000001	4000000	C3	Tu/Tu
5	3000001	4000000	C4	Tu/Tu
5	3000001	4000000	C5	Tu/Tu
5	3000001	4000000	C6	Tu/Tu
5	3000001	4000000	C7	Tu/Tu
5	3000001	4000000	C8	Tu/Tu
5	3000001	4000000	C9	Tu/Tu
5	3000001	4000000	C10	Tu/Tu
5	3000001	4000000	C11	Tu/Tu
5	3000001	4000000	C12	Tu/Tu
5	3000001	4000000	D1	Tu/Tu
5	3000001	4000000	D2	Tu/Tu
5	3000001	4000000	D3	Tu/Tu
5	3000001	4000000	D4	Tu/Tu
5	3000001	4000000	D5	Tu/Tu
5	3000001	4000000	D6	Tu/Tu
5	3000001	4000000	D7	Tu/Tu
5	3000001	4000000	D8	Tu/Tu
5	3000001	4000000	D9	Tu/Tu
5	3000001	4000000	D10	Tu/Tu
5	3000001	4000000	D11	Tu/Tu
5	3000001	4000000	D12	Tu/Tu
5	3000001	4000000	E1	Tu/Tu
5	3000001	4000000	E2	Tu/Tu
5	3000001	4000000	E3	Tu/Tu
5	3000001	4000000	E4	Tu/Tu
5	3000001	4000000	E5	Tu/Tu
5	3000001	4000000	E6	Tu/Tu
5	3000001	4000000	E7	Tu/Tu
5	3000001	4000000	E8	Tu/Tu
5	3000001	4000000	E9	Tu/Tu
5	3000001	4000000	E10	Tu/Tu
5	3000001	4000000	E11	Tu/Tu
5	3000001	4000000	E12	Tu/Tu
5	3000001	4000000	F1	Tu/Tu
5	3000001	4000000	F2	Tu/Tu
5	3000001	4000000	F3	Tu/Tu
5	3000001	4000000	F4	Tu/Tu
5	3000001	4000000	F5	Tu/Tu
5	3000001	4000000	F6	Tu/Tu
5	3000001	4000000	F7	Tu/Tu
5	3000001	4000000	F8	Tu/Tu
5	3000001	4000000	F9	Tu/Tu
5	3000001	4000000	F10	Tu/Tu
5	3000001	4000000	F11	Tu/Tu
5	3000001	4000000	F12	Tu/Tu
5	3000001	4000000	G1	Tu/Tu
5	3000001	4000000	G2	Tu/Tu
5	3000001	4000000	G3	Tu/Tu
5	3000001	4000000	G4	Tu/Tu
5	3000001	4000000	G5	Tu/Tu
5	3000001	4000000	G6	Tu/Tu
5	3000001	4000000	G7	Tu/Tu
5	3000001	4000000	G8	Tu/Tu
5	3000001	4000000	G9	Tu/Tu
5	3000001	4000000	G10	Tu/Tu
5	3000001	4000000	G11	Tu/Tu
5	3000001	4000000	G12	Tu/Tu
5	3000001	4000000	H1	Tu/Tu
5	3000001	4000000	H2	Tu/Tu
5	3000001	4000000	H3	Tu/Tu
5	3000001	4000000	H4	Tu/Tu
5	3000001	4000000	H5	Tu/Tu
5	3000001	4000000	H6	Tu/Tu
5	3000001	4000000	H7	Tu/Tu
5	3000001	4000000	H8	Tu/Tu
5	3000001	4000000	H9	Tu/Tu
5	3000001	4000000	H10	Tu/Tu
5	3000001	4000000	H11	Tu/Tu
5	3000001	4000000	H12	Tu/Tu
5	4000001	5000000	SAT_5	Tu/Tu
5	4000001	5000000	SAT_6	Tu/Tu
5	4000001	5000000	A1	Tu/Tu
5	4000001	5000000	A2	Tu/Tu
5	4000001	5000000	A3	Tu/Tu
5	4000001	5000000	A4	Tu/Tu
5	4000001	5000000	A5	Tu/Tu
5	4000001	5000000	A6	Tu/Tu
5	4000001	5000000	A7	Tu/Tu
5	4000001	5000000	A8	Tu/Tu
5	4000001	5000000	A9	Tu/Tu
5	4000001	5000000	A10	Tu/Tu
5	4000001	5000000	A11	Tu/Tu
5	4000001	5000000	A12	Tu/Tu
5	4000001	5000000	B1	Tu/Tu
5	4000001	5000000	B2	Tu/Tu
5	4000001	5000000	B3	Tu/Tu
5	4000001	5000000	B4	Tu/Tu
5	4000001	5000000	B5	Tu/Tu
5	4000001	5000000	B6	Tu/Tu
5	4000001	5000000	B7	Tu/Tu
5	4000001	5000000	B8	Tu/Tu
5	4000001	5000000	B9	Tu/Tu
5	4000001	5000000	B10	Tu/Tu
5	4000001	5000000	B11	Tu/Tu
5	4000001	5000000	B12	Tu/Tu
5	4000001	5000000	C1	Tu/Tu
5	4000001	5000000	C2	Tu/Tu
5	4000001	5000000	C3	Tu/Tu
5	4000001	5000000	C4	Tu/Tu
5	4000001	5000000	C5	Tu/Tu
5	4000001	5000000	C6	Tu/Tu
5	4000001	5000000	C7	Tu/Tu
5	4000001	5000000	C8	Tu/Tu
5	4000001	5000000	C9	Tu/Tu
5	4000001	5000000	C10	Tu/Tu
5	4000001	5000000	C11	Tu/Tu
5	4000001	5000000	C12	Tu/Tu
5	4000001	5000000	D1	Tu/Tu
5	4000001	5000000	D2	Tu/Tu
5	4000001	5000000	D3	Tu/Tu
5	4000001	5000000	D4	Tu/Tu
5	4000001	5000000	D5	Tu/Tu
5	4000001	5000000	D6	Tu/Tu
5	4000001	5000000	D7	Tu/Tu
5	4000001	5000000	D8	Tu/Tu
5	4000001	5000000	D9	Tu/Tu
5	4000001	5000000	D10	Tu/Tu
5	4000001	5000000	D11	Tu/Tu
5	4000001	5000000	D12	Tu/Tu
5	4000001	5000000	E1	Tu/Tu
5	4000001	5000000	E2	Tu/Tu
5	4000001	5000000	E3	Tu/Tu
5	4000001	5000000	E4	Tu/Tu
5	4000001	5000000	E5	Tu/Tu
5	4000001	5000000	E6	Tu/Tu
5	4000001	5000000	E7	Tu/Tu
5	4000001	5000000	E8	Tu/Tu
5	4000001	5000000	E9	Tu/Tu
5	4000001	5000000	E10	Tu/Tu
5	4000001	5000000	E11	Tu/Tu
5	4000001	5000000	E12	Tu/Tu
5	4000001	5000000	F1	Tu/Tu
5	4000001	5000000	F2	Tu/Tu
5	4000001	5000000	F3	Tu/Tu
5	4000001	5000000	F4	Tu/Tu
5	4000001	5000000	F5	Tu/Tu
5	4000001	5000000	F6	Tu/Tu
5	4000001	5000000	F7	Tu/Tu
5	4000001	5000000	F8	Tu/Tu
5	4000001	5000000	F9	Tu/Tu
5	4000001	5000000	F10	Tu/Tu
5	4000001	5000000	F11	Tu/Tu
5	4000001	5000000	F12	Tu/Tu
5	4000001	5000000	G1	Tu/Tu
5	4000001	5000000	G2	Tu/Tu
5	4000001	5000000	G3	Tu/Tu
5	4000001	5000000	G4	Tu/Tu
5	4000001	5000000	G5	Tu/Tu
5	4000001	5000000	G6	Tu/Tu
5	4000001	5000000	G7	Tu/Tu
5	4000001	5000000	G8	Tu/Tu
5	4000001	5000000	G9	Tu/Tu
5	4000001	5000000	G10	Tu/Tu
5	4000001	5000000	G11	Tu/Tu
5	4000001	5000000	G12	Tu/Tu
5	4000001	5000000	H1	Tu/Tu
5	4000001	5000000	H2	Tu/Tu
5	4000001	5000000	H3	Tu/Tu
5	4000001	5000000	H4	Tu/Tu
5	4000001	5000000	H5	Tu/Tu
5	4000001	5000000	H6	Tu/Tu
5	4000001	5000000	H7	Tu/Tu
5	4000001	5000000	H8	Tu/Tu
5	4000001	5000000	H9	Tu/Tu
5	4000001	5000000	H10	Tu/Tu
5	4000001	5000000	H11	Tu/Tu
5	4000001	5000000	H12	Tu/Tu
5	5000001	6000000	SAT_5	Tu/Tu
5	5000001	6000000	SAT_6	Tu/Tu
5	5000001	6000000	A1	Tu/Tu
5	5000001	6000000	A2	Tu/Tu
5	5000001	6000000	A3	Tu/Tu
5	5000001	6000000	A4	Tu/Tu
5	5000001	6000000	A5	Tu/Tu
5	5000001	6000000	A6	Tu/Tu
5	5000001	6000000	A7	Tu/Tu
5	5000001	6000000	A8	Tu/Tu
5	5000001	6000000	A9	Tu/Tu
5	5000001	6000000	A10	Tu/Tu
5	5000001	6000000	A11	Tu/Tu
5	5000001	6000000	A12	Tu/Tu
5	5000001	6000000	B1	Tu/Tu
5	5000001	6000000	B2	Tu/Tu
5	5000001	6000000	B3	Tu/Tu
5	5000001	6000000	B4	Tu/Tu
5	5000001	6000000	B5	Tu/Tu
5	5000001	6000000	B6	Tu/Tu
5	5000001	6000000	B7	Tu/Tu
5	5000001	6000000	B8	Tu/Tu
5	5000001	6000000	B9	Tu/Tu
5	5000001	6000000	B10	Tu/Tu
5	5000001	6000000	B11	Tu/Tu
5	5000001	6000000	B12	Tu/Tu
5	5000001	6000000	C1	Tu/Tu
5	5000001	6000000	C2	Tu/Tu
5	5000001	6000000	C3	Tu/Tu
5	5000001	6000000	C4	Tu/Tu
5	5000001	6000000	C5	Tu/Tu
5	5000001	6000000	C6	Tu/Tu
5	5000001	6000000	C7	Tu/Tu
5	5000001	6000000	C8	Tu/Tu
5	5000001	6000000	C9	Tu/Tu
5	5000001	6000000	C10	Tu/Tu
5	5000001	6000000	C11	Tu/Tu
5	5000001	6000000	C12	Tu/Tu
5	5000001	6000000	D1	Tu/Tu
5	5000001	6000000	D2	Tu/Tu
5	5000001	6000000	D3	Tu/Tu
5	5000001	6000000	D4	Tu/Tu
5	5000001	6000000	D5	Tu/Tu
5	5000001	6000000	D6	Tu/Tu
5	5000001	6000000	D7	Tu/Tu
5	5000001	6000000	D8	Tu/Tu
5	5000001	6000000	D9	Tu/Tu
5	5000001	6000000	D10	Tu/Tu
5	5000001	6000000	D11	Tu/Tu
5	5000001	6000000	D12	Tu/Tu
5	5000001	6000000	E1	Tu/Tu
5	5000001	6000000	E2	Tu/Tu
5	5000001	6000000	E3	Tu/Tu
5	5000001	6000000	E4	Tu/Tu
5	5000001	6000000	E5	Tu/Tu
5	5000001	6000000	E6	Tu/Tu
5	5000001	6000000	E7	Tu/Tu
5	5000001	6000000	E8	Tu/Tu
5	5000001	6000000	E9	Tu/Tu
5	5000001	6000000	E10	Tu/Tu
5	5000001	6000000	E11	Tu/Tu
5	5000001	6000000	E12	Tu/Tu
5	5000001	6000000	F1	Tu/Tu
5	5000001	6000000	F2	Tu/Tu
5	5000001	6000000	F3	Tu/Tu
5	5000001	6000000	F4	Tu/Tu
5	5000001	6000000	F5	Tu/Tu
5	5000001	6000000	F6	Tu/Tu
5	5000001	6000000	F7	Tu/Tu
5	5000001	6000000	F8	Tu/Tu
5	5000001	6000000	F9	Tu/Tu
5	5000001	6000000	F10	Tu/Tu
5	5000001	6000000	F11	Tu/Tu
5	5000001	6000000	F12	Tu/Tu
5	5000001	6000000	G1	Tu/Tu
5	5000001	6000000	G2	Tu/Tu
5	5000001	6000000	G3	Tu/Tu
5	5000001	6000000	G4	Tu/Tu
5	5000001	6000000	G5	Tu/Tu
5	5000001	6000000	G6	Tu/Tu
5	5000001	6000000	G7	Tu/Tu
5	5000001	6000000	G8	Tu/Tu
5	5000001	6000000	G9	Tu/Tu
5	5000001	6000000	G10	Tu/Tu
5	5000001	6000000	G11	Tu/Tu
5	5000001	6000000	G12	Tu/Tu
5	5000001	6000000	H1	Tu/Tu
5	5000001	6000000	H2	Tu/Tu
5	5000001	6000000	H3	Tu/Tu
5	5000001	6000000	H4	Tu/Tu
5	5000001	6000000	H5	Tu/Tu
5	5000001	6000000	H6	Tu/Tu
5	5000001	6000000	H7	Tu/Tu
5	5000001	6000000	H8	Tu/Tu
5	5000001	6000000	H9	Tu/Tu
5	5000001	6000000	H10	Tu/Tu
5	5000001	6000000	H11	Tu/Tu
5	5000001	6000000	H12	Tu/Tu
5	6000001	7000000	SAT_5	Tu/Tu
5	6000001	7000000	SAT_6	Tu/Tu
5	6000001	7000000	A1	Tu/Tu
5	6000001	7000000	A2	Tu/Tu
5	6000001	7000000	A3	Tu/Tu
5	6000001	7000000	A4	Tu/Tu
5	6000001	7000000	A5	Tu/Tu
5	6000001	7000000	A6	Tu/Tu
5	6000001	7000000	A7	Tu/Tu
5	6000001	7000000	A8	Tu/Tu
5	6000001	7000000	A9	Tu/Tu
5	6000001	7000000	A10	Tu/Tu
5	6000001	7000000	A11	Tu/Tu
5	6000001	7000000	A12	Tu/Tu
5	6000001	7000000	B1	Tu/Tu
5	6000001	7000000	B2	Tu/Tu
5	6000001	7000000	B3	Tu/Tu
5	6000001	7000000	B4	Tu/Tu
5	6000001	7000000	B5	Tu/Tu
5	6000001	7000000	B6	Tu/Tu
5	6000001	7000000	B7	Tu/Tu
5	6000001	7000000	B8	Tu/Tu
5	6000001	7000000	B9	Tu/Tu
5	6000001	7000000	B10	Tu/Tu
5	6000001	7000000	B11	Tu/Tu
5	6000001	7000000	B12	Tu/Tu
5	6000001	7000000	C1	Tu/Tu
5	6000001	7000000	C2	Tu/Tu
5	6000001	7000000	C3	Tu/Tu
5	6000001	7000000	C4	Tu/Tu
5	6000001	7000000	C5	Tu/Tu
5	6000001	7000000	C6	Tu/Tu
5	6000001	7000000	C7	Tu/Tu
5	6000001	7000000	C8	Tu/Tu
5	6000001	7000000	C9	Tu/Tu
5	6000001	7000000	C10	Tu/Tu
5	6000001	7000000	C11	Tu/Tu
5	6000001	7000000	C12	Tu/Tu
5	6000001	7000000	D1	Tu/Tu
5	6000001	7000000	D2	Tu/Tu
5	6000001	7000000	D3	Tu/Tu
5	6000001	7000000	D4	Tu/Tu
5	6000001	7000000	D5	Tu/Tu
5	6000001	7000000	D6	Tu/Tu
5	6000001	7000000	D7	Tu/Tu
5	6000001	7000000	D8	Tu/Tu
5	6000001	7000000	D9	Tu/Tu
5	6000001	7000000	D10	Tu/Tu
5	6000001	7000000	D11	Tu/Tu
5	6000001	7000000	D12	Tu/Tu
5	6000001	7000000	E1	Tu/Tu
5	6000001	7000000	E2	Tu/Tu
5	6000001	7000000	E3	Tu/Tu
5	6000001	7000000	E4	Tu/Tu
5	6000001	7000000	E5	Tu/Tu
5	6000001	7000000	E6	Tu/Tu
5	6000001	7000000	E7	Tu/Tu
5	6000001	7000000	E8	Tu/Tu
5	6000001	7000000	E9	Tu/Tu
5	6000001	7000000	E10	Tu/Tu
5	6000001	7000000	E11	Tu/Tu
5	6000001	7000000	E12	Tu/Tu
5	6000001	7000000	F1	Tu/Tu
5	6000001	7000000	F2	Tu/Tu
5	6000001	7000000	F3	Tu/Tu
5	6000001	7000000	F4	Tu/Tu
5	6000001	7000000	F5	Tu/Tu
5	6000001	7000000	F6	Tu/Tu
5	6000001	7000000	F7	Tu/Tu
5	6000001	7000000	F8	Tu/Tu
5	6000001	7000000	F9	Tu/Tu
5	6000001	7000000	F10	Tu/Tu
5	6000001	7000000	F11	Tu/Tu
5	6000001	7000000	F12	Tu/Tu
5	6000001	7000000	G1	Tu/Tu
5	6000001	7000000	G2	Tu/Tu
5	6000001	7000000	G3	Tu/Tu
5	6000001	7000000	G4	Tu/Tu
5	6000001	7000000	G5	Tu/Tu
5	6000001	7000000	G6	Tu/Tu
5	6000001	7000000	G7	Tu/Tu
5	6000001	7000000	G8	Tu/Tu
5	6000001	7000000	G9	Tu/Tu
5	6000001	7000000	G10	Tu/Tu
5	6000001	7000000	G11	Tu/Tu
5	6000001	7000000	G12	Tu/Tu
5	6000001	7000000	H1	Tu/Tu
5	6000001	7000000	H2	Tu/Tu
5	6000001	7000000	H3	Tu/Tu
5	6000001	7000000	H4	Tu/Tu
5	6000001	7000000	H5	Tu/Tu
5	6000001	7000000	H6	Tu/Tu
5	6000001	7000000	H7	Tu/Tu
5	6000001	7000000	H8	Tu/Tu
5	6000001	7000000	H9	Tu/Tu
5	6000001	7000000	H10	Tu/Tu
5	6000001	7000000	H11	Tu/Tu
5	6000001	7000000	H12	Tu/Tu
5	7000001	8000000	SAT_5	Tu/Tu
5	7000001	8000000	SAT_6	Tu/Tu
5	7000001	8000000	A1	Tu/Tu
5	7000001	8000000	A2	Tu/Tu
5	7000001	8000000	A3	Tu/Tu
5	7000001	8000000	A4	Tu/Tu
5	7000001	8000000	A5	Tu/Tu
5	7000001	8000000	A6	Tu/Tu
5	7000001	8000000	A7	Tu/Tu
5	7000001	8000000	A8	Tu/Tu
5	7000001	8000000	A9	Tu/Tu
5	7000001	8000000	A10	Tu/Tu
5	7000001	8000000	A11	Tu/Tu
5	7000001	8000000	A12	Tu/Tu
5	7000001	8000000	B1	Tu/Tu
5	7000001	8000000	B2	Tu/Tu
5	7000001	8000000	B3	Tu/Tu
5	7000001	8000000	B4	Tu/Tu
5	7000001	8000000	B5	Tu/Tu
5	7000001	8000000	B6	Tu/Tu
5	7000001	8000000	B7	Tu/Tu
5	7000001	8000000	B8	Tu/Tu
5	7000001	8000000	B9	Tu/Tu
5	7000001	8000000	B10	Tu/Tu
5	7000001	8000000	B11	Tu/Tu
5	7000001	8000000	B12	Tu/Tu
5	7000001	8000000	C1	Tu/Tu
5	7000001	8000000	C2	Tu/Tu
5	7000001	8000000	C3	Tu/Tu
5	7000001	8000000	C4	Tu/Tu
5	7000001	8000000	C5	Tu/Tu
5	7000001	8000000	C6	Tu/Tu
5	7000001	8000000	C7	Tu/Tu
5	7000001	8000000	C8	Tu/Tu
5	7000001	8000000	C9	Tu/Tu
5	7000001	8000000	C10	Tu/Tu
5	7000001	8000000	C11	Tu/Tu
5	7000001	8000000	C12	Tu/Tu
5	7000001	8000000	D1	Tu/Tu
5	7000001	8000000	D2	Tu/Tu
5	7000001	8000000	D3	Tu/Tu
5	7000001	8000000	D4	Tu/Tu
5	7000001	8000000	D5	Tu/Tu
5	7000001	8000000	D6	Tu/Tu
5	7000001	8000000	D7	Tu/Tu
5	7000001	8000000	D8	Tu/Tu
5	7000001	8000000	D9	Tu/Tu
5	7000001	8000000	D10	Tu/Tu
5	7000001	8000000	D11	Tu/Tu
5	7000001	8000000	D12	Tu/Tu
5	7000001	8000000	E1	Tu/Tu
5	7000001	8000000	E2	Tu/Tu
5	7000001	8000000	E3	Tu/Tu
5	7000001	8000000	E4	Tu/Tu
5	7000001	8000000	E5	Tu/Tu
5	7000001	8000000	E6	Tu/Tu
5	7000001	8000000	E7	Tu/Tu
5	7000001	8000000	E8	Tu/Tu
5	7000001	8000000	E9	Tu/Tu
5	7000001	8000000	E10	Tu/Tu
5	7000001	8000000	E11	Tu/Tu
5	7000001	8000000	E12	Tu/Tu
5	7000001	8000000	F1	Tu/Tu
5	7000001	8000000	F2	Tu/Tu
5	7000001	8000000	F3	Tu/Tu
5	7000001	8000000	F4	Tu/Tu
5	7000001	8000000	F5	Tu/Tu
5	7000001	8000000	F6	Tu/Tu
5	7000001	8000000	F7	Tu/Tu
5	7000001	8000000	F8	Tu/Tu
5	7000001	8000000	F9	Tu/Tu
5	7000001	8000000	F10	Tu/Tu
5	7000001	8000000	F11	Tu/Tu
5	7000001	8000000	F12	Tu/Tu
5	7000001	8000000	G1	Tu/Tu
5	7000001	8000000	G2	Tu/Tu
5	7000001	8000000	G3	Tu/Tu
5	7000001	8000000	G4	Tu/Tu
5	7000001	8000000	G5	Tu/Tu
5	7000001	8000000	G6	Tu/Tu
5	7000001	8000000	G7	Tu/Tu
5	7000001	8000000	G8	Tu/Tu
5	7000001	8000000	G9	Tu/Tu
5	7000001	8000000	G10	Tu/Tu
5	7000001	8000000	G11	Tu/Tu
5	7000001	8000000	G12	Tu/Tu
5	7000001	8000000	H1	Tu/Tu
5	7000001	8000000	H2	Tu/Tu
5	7000001	8000000	H3	Tu/Tu
5	7000001	8000000	H4	Tu/Tu
5	7000001	8000000	H5	Tu/Tu
5	7000001	8000000	H6	Tu/Tu
5	7000001	8000000	H7	Tu/Tu
5	7000001	8000000	H8	Tu/Tu
5	7000001	8000000	H9	Tu/Tu
5	7000001	8000000	H10	Tu/Tu
5	7000001	8000000	H11	Tu/Tu
5	7000001	8000000	H12	Tu/Tu
5	8000001	9000000	SAT_5	Tu/Tu
5	8000001	9000000	SAT_6	Tu/Tu
5	8000001	9000000	A1	Tu/Tu
5	8000001	9000000	A2	Tu/Tu
5	8000001	9000000	A3	Tu/Tu
5	8000001	9000000	A4	Tu/Tu
5	8000001	9000000	A5	Tu/Tu
5	8000001	9000000	A6	Tu/Tu
5	8000001	9000000	A7	Tu/Tu
5	8000001	9000000	A8	Tu/Tu
5	8000001	9000000	A9	Tu/Tu
5	8000001	9000000	A10	Tu/Tu
5	8000001	9000000	A11	Tu/Tu
5	8000001	9000000	A12	Tu/Tu
5	8000001	9000000	B1	Tu/Tu
5	8000001	9000000	B2	Tu/Tu
5	8000001	9000000	B3	Tu/Tu
5	8000001	9000000	B4	Tu/Tu
5	8000001	9000000	B5	Tu/Tu
5	8000001	9000000	B6	Tu/Tu
5	8000001	9000000	B7	Tu/Tu
5	8000001	9000000	B8	Tu/Tu
5	8000001	9000000	B9	Tu/Tu
5	8000001	9000000	B10	Tu/Tu
5	8000001	9000000	B11	Tu/Tu
5	8000001	9000000	B12	Tu/Tu
5	8000001	9000000	C1	Tu/Tu
5	8000001	9000000	C2	Tu/Tu
5	8000001	9000000	C3	Tu/Tu
5	8000001	9000000	C4	Tu/Tu
5	8000001	9000000	C5	Tu/Tu
5	8000001	9000000	C6	Tu/Tu
5	8000001	9000000	C7	Tu/Tu
5	8000001	9000000	C8	Tu/Tu
5	8000001	9000000	C9	Tu/Tu
5	8000001	9000000	C10	Tu/Tu
5	8000001	9000000	C11	Tu/Tu
5	8000001	9000000	C12	Tu/Tu
5	8000001	9000000	D1	Tu/Tu
5	8000001	9000000	D2	Tu/Tu
5	8000001	9000000	D3	Tu/Tu
5	8000001	9000000	D4	Tu/Tu
5	8000001	9000000	D5	Tu/Tu
5	8000001	9000000	D6	Tu/Tu
5	8000001	9000000	D7	Tu/Tu
5	8000001	9000000	D8	Tu/Tu
5	8000001	9000000	D9	Tu/Tu
5	8000001	9000000	D10	Tu/Tu
5	8000001	9000000	D11	Tu/Tu
5	8000001	9000000	D12	Tu/Tu
5	8000001	9000000	E1	Tu/Tu
5	8000001	9000000	E2	Tu/Tu
5	8000001	9000000	E3	Tu/Tu
5	8000001	9000000	E4	Tu/Tu
5	8000001	9000000	E5	Tu/Tu
5	8000001	9000000	E6	Tu/Tu
5	8000001	9000000	E7	Tu/Tu
5	8000001	9000000	E8	Tu/Tu
5	8000001	9000000	E9	Tu/Tu
5	8000001	9000000	E10	Tu/Tu
5	8000001	9000000	E11	Tu/Tu
5	8000001	9000000	E12	Tu/Tu
5	8000001	9000000	F1	Tu/Tu
5	8000001	9000000	F2	Tu/Tu
5	8000001	9000000	F3	Tu/Tu
5	8000001	9000000	F4	Tu/Tu
5	8000001	9000000	F5	Tu/Tu
5	8000001	9000000	F6	Tu/Tu
5	8000001	9000000	F7	Tu/Tu
5	8000001	9000000	F8	Tu/Tu
5	8000001	9000000	F9	Tu/Tu
5	8000001	9000000	F10	Tu/Tu
5	8000001	9000000	F11	Tu/Tu
5	8000001	9000000	F12	Tu/Tu
5	8000001	9000000	G1	Tu/Tu
5	8000001	9000000	G2	Tu/Tu
5	8000001	9000000	G3	Tu/Tu
5	8000001	9000000	G4	Tu/Tu
5	8000001	9000000	G5	Tu/Tu
5	8000001	9000000	G6	Tu/Tu
5	8000001	9000000	G7	Tu/Tu
5	8000001	9000000	G8	Tu/Tu
5	8000001	9000000	G9	Tu/Tu
5	8000001	9000000	G10	Tu/Tu
5	8000001	9000000	G11	Tu/Tu
5	8000001	9000000	G12	Tu/Tu
5	8000001	9000000	H1	Tu/Tu
5	8000001	9000000	H2	Tu/Tu
5	8000001	9000000	H3	Tu/Tu
5	8000001	9000000	H4	Tu/Tu
5	8000001	9000000	H5	Tu/Tu
5	8000001	9000000	H6	Tu/Tu
5	8000001	9000000	H7	Tu/Tu
5	8000001	9000000	H8	Tu/Tu
5	8000001	9000000	H9	Tu/Tu
5	8000001	9000000	H10	Tu/Tu
5	8000001	9000000	H11	Tu/Tu
5	8000001	9000000	H12	Tu/Tu
5	9000001	10000000	SAT_5	Tu/Tu
5	9000001	10000000	SAT_6	Tu/Tu
5	9000001	10000000	A1	Tu/Tu
5	9000001	10000000	A2	Tu/Tu
5	9000001	10000000	A3	Tu/Tu
5	9000001	10000000	A4	Tu/Tu
5	9000001	10000000	A5	Tu/Tu
5	9000001	10000000	A6	Tu/Tu
5	9000001	10000000	A7	Tu/Tu
5	9000001	10000000	A8	Tu/Tu
5	9000001	10000000	A9	Tu/Tu
5	9000001	10000000	A10	Tu/Tu
5	9000001	10000000	A11	Tu/Tu
5	9000001	10000000	A12	Tu/Tu
5	9000001	10000000	B1	Tu/Tu
5	9000001	10000000	B2	Tu/Tu
5	9000001	10000000	B3	Tu/Tu
5	9000001	10000000	B4	Tu/Tu
5	9000001	10000000	B5	Tu/Tu
5	9000001	10000000	B6	Tu/Tu
5	9000001	10000000	B7	Tu/Tu
5	9000001	10000000	B8	Tu/Tu
5	9000001	10000000	B9	Tu/Tu
5	9000001	10000000	B10	Tu/Tu
5	9000001	10000000	B11	Tu/Tu
5	9000001	10000000	B12	Tu/Tu
5	9000001	10000000	C1	Tu/Tu
5	9000001	10000000	C2	Tu/Tu
5	9000001	10000000	C3	Tu/Tu
5	9000001	10000000	C4	Tu/Tu
5	9000001	10000000	C5	Tu/Tu
5	9000001	10000000	C6	Tu/Tu
5	9000001	10000000	C7	Tu/Tu
5	9000001	10000000	C8	Tu/Tu
5	9000001	10000000	C9	Tu/Tu
5	9000001	10000000	C10	Tu/Tu
5	9000001	10000000	C11	Tu/Tu
5	9000001	10000000	C12	Tu/Tu
5	9000001	10000000	D1	Tu/Tu
5	9000001	10000000	D2	Tu/Tu
5	9000001	10000000	D3	Tu/Tu
5	9000001	10000000	D4	Tu/Tu
5	9000001	10000000	D5	Tu/Tu
5	9000001	10000000	D6	Tu/Tu
5	9000001	10000000	D7	Tu/Tu
5	9000001	10000000	D8	Tu/Tu
5	9000001	10000000	D9	Tu/Tu
5	9000001	10000000	D10	Tu/Tu
5	9000001	10000000	D11	Tu/Tu
5	9000001	10000000	D12	Tu/Tu
5	9000001	10000000	E1	Tu/Tu
5	9000001	10000000	E2	Tu/Tu
5	9000001	10000000	E3	Tu/Tu
5	9000001	10000000	E4	Tu/Tu
5	9000001	10000000	E5	Tu/Tu
5	9000001	10000000	E6	Tu/Tu
5	9000001	10000000	E7	Tu/Tu
5	9000001	10000000	E8	Tu/Tu
5	9000001	10000000	E9	Tu/Tu
5	9000001	10000000	E10	Tu/Tu
5	9000001	10000000	E11	Tu/Tu
5	9000001	10000000	E12	Tu/Tu
5	9000001	10000000	F1	Tu/Tu
5	9000001	10000000	F2	Tu/Tu
5	9000001	10000000	F3	Tu/Tu
5	9000001	10000000	F4	Tu/Tu
5	9000001	10000000	F5	Tu/Tu
5	9000001	10000000	F6	Tu/Tu
5	9000001	10000000	F7	Tu/Tu
5	9000001	10000000	F8	Tu/Tu
5	9000001	10000000	F9	Tu/Tu
5	9000001	10000000	F10	Tu/Tu
5	9000001	10000000	F11	Tu/Tu
5	9000001	10000000	F12	Tu/Tu
5	9000001	10000000	G1	Tu/Tu
5	9000001	10000000	G2	Tu/Tu
5	9000001	10000000	G3	Tu/Tu
5	9000001	10000000	G4	Tu/Tu
5	9000001	10000000	G5	Tu/Tu
5	9000001	10000000	G6	Tu/Tu
5	9000001	10000000	G7	Tu/Tu
5	9000001	10000000	G8	Tu/Tu
5	9000001	10000000	G9	Tu/Tu
5	9000001	10000000	G10	Tu/Tu
5	9000001	10000000	G11	Tu/Tu
5	9000001	10000000	G12	Tu/Tu
5	9000001	10000000	H1	Tu/Tu
5	9000001	10000000	H2	Tu/Tu
5	9000001	10000000	H3	Tu/Tu
5	9000001	10000000	H4	Tu/Tu
5	9000001	10000000	H5	Tu/Tu
5	9000001	10000000	H6	Tu/Tu
5	9000001	10000000	H7	Tu/Tu
5	9000001	10000000	H8	Tu/Tu
5	9000001	10000000	H9	Tu/Tu
5	9000001	10000000	H10	Tu/Tu
5	9000001	10000000	H11	Tu/Tu
5	9000001	10000000	H12	Tu/Tu
5	10000001	11000000	SAT_5	Tu/Tu
5	10000001	11000000	SAT_6	AB/AB
5	10000001	11000000	A1	NC
5	10000001	11000000	A2	NC
5	10000001	11000000	A3	NC
5	10000001	11000000	A4	NC
5	10000001	11000000	A5	NC
5	10000001	11000000	A6	NC
5	10000001	11000000	A7	NC
5	10000001	11000000	A8	NC
5	10000001	11000000	A9	NC
5	10000001	11000000	A10	NC
5	10000001	11000000	A11	NC
5	10000001	11000000	A12	NC
5	10000001	11000000	B1	NC
5	10000001	11000000	B2	NC
5	10000001	11000000	B3	NC
5	10000001	11000000	B4	NC
5	10000001	11000000	B5	NC
5	10000001	11000000	B6	NC
5	10000001	11000000	B7	NC
5	10000001	11000000	B8	NC
5	10000001	11000000	B9	NC
5	10000001	11000000	B10	NC
5	10000001	11000000	B11	NC
5	10000001	11000000	B12	NC
5	10000001	11000000	C1	NC
5	10000001	11000000	C2	NC
5	10000001	11000000	C3	NC
5	10000001	11000000	C4	NC
5	10000001	11000000	C5	NC
5	10000001	11000000	C6	NC
5	10000001	11000000	C7	NC
5	10000001	11000000	C8	NC
5	10000001	11000000	C9	NC
5	10000001	11000000	C10	NC
5	10000001	11000000	C11	NC
5	10000001	11000000	C12	NC
5	10000001	11000000	D1	NC
5	10000001	11000000	D2	NC
5	10000001	11000000	D3	NC
5	10000001	11000000	D4	NC
5	10000001	11000000	D5	NC
5	10000001	11000000	D6	NC
5	10000001	11000000	D7	NC
5	10000001	11000000	D8	NC
5	10000001	11000000	D9	NC
5	10000001	11000000	D10	NC
5	10000001	11000000	D11	NC
5	10000001	11000000	D12	NC
5	10000001	11000000	E1	NC
5	10000001	11000000	E2	NC
5	10000001	11000000	E3	NC
5	10000001	11000000	E4	NC
5	10000001	11000000	E5	NC
5	10000001	11000000	E6	NC
5	10000001	11000000	E7	NC
5	10000001	11000000	E8	NC
5	10000001	11000000	E9	NC
5	10000001	11000000	E10	NC
5	10000001	11000000	E11	NC
5	10000001	11000000	E12	NC
5	10000001	11000000	F1	NC
5	10000001	11000000	F2	NC
5	10000001	11000000	F3	NC
5	10000001	11000000	F4	NC
5	10000001	11000000	F5	NC
5	10000001	11000000	F6	NC
5	10000001	11000000	F7	NC
5	10000001	11000000	F8	NC
5	10000001	11000000	F9	NC
5	10000001	11000000	F10	NC
5	10000001	11000000	F11	NC
5	10000001	11000000	F12	NC
5	10000001	11000000	G1	NC
5	10000001	11000000	G2	NC
5	10000001	11000000	G3	NC
5	10000001	11000000	G4	NC
5	10000001	11000000	G5	NC
5	10000001	11000000	G6	NC
5	10000001	11000000	G7	NC
5	10000001	11000000	G8	NC
5	10000001	11000000	G9	NC
5	10000001	11000000	G10	NC
5	10000001	11000000	G11	NC
5	10000001	11000000	G12	NC
5	10000001	11000000	H1	NC
5	10000001	11000000	H2	NC
5	10000001	11000000	H3	NC
5	10000001	11000000	H4	NC
5	10000001	11000000	H5	NC
5	10000001	11000000	H6	NC
5	10000001	11000000	H7	NC
5	10000001	11000000	H8	NC
5	10000001	11000000	H9	NC
5	10000001	11000000	H10	NC
5	10000001	11000000	H11	NC
5	10000001	11000000	H12	NC
5	11000001	12000000	SAT_5	Tu/Tu
5	11000001	12000000	SAT_6	AB/AB
5	11000001	12000000	A1	NC
5	11000001	12000000	A2	NC
5	11000001	12000000	A3	NC
5	11000001	12000000	A4	NC
5	11000001	12000000	A5	NC
5	11000001	12000000	A6	NC
5	11000001	12000000	A7	NC
5	11000001	12000000	A8	NC
5	11000001	12000000	A9	NC
5	11000001	12000000	A10	NC
5	11000001	12000000	A11	NC
5	11000001	12000000	A12	NC
5	11000001	12000000	B1	NC
5	11000001	12000000	B2	NC
5	11000001	12000000	B3	NC
5	11000001	12000000	B4	NC
5	11000001	12000000	B5	NC
5	11000001	12000000	B6	NC
5	11000001	12000000	B7	NC
5	11000001	12000000	B8	NC
5	11000001	12000000	B9	NC
5	11000001	12000000	B10	NC
5	11000001	12000000	B11	NC
5	11000001	12000000	B12	NC
5	11000001	12000000	C1	NC
5	11000001	12000000	C2	NC
5	11000001	12000000	C3	NC
5	11000001	12000000	C4	NC
5	11000001	12000000	C5	NC
5	11000001	12000000	C6	NC
5	11000001	12000000	C7	NC
5	11000001	12000000	C8	NC
5	11000001	12000000	C9	NC
5	11000001	12000000	C10	NC
5	11000001	12000000	C11	NC
5	11000001	12000000	C12	NC
5	11000001	12000000	D1	NC
5	11000001	12000000	D2	NC
5	11000001	12000000	D3	NC
5	11000001	12000000	D4	NC
5	11000001	12000000	D5	NC
5	11000001	12000000	D6	NC
5	11000001	12000000	D7	NC
5	11000001	12000000	D8	NC
5	11000001	12000000	D9	NC
5	11000001	12000000	D10	NC
5	11000001	12000000	D11	NC
5	11000001	12000000	D12	NC
5	11000001	12000000	E1	NC
5	11000001	12000000	E2	NC
5	11000001	12000000	E3	NC
5	11000001	12000000	E4	NC
5	11000001	12000000	E5	NC
5	11000001	12000000	E6	NC
5	11000001	12000000	E7	NC
5	11000001	12000000	E8	NC
5	11000001	12000000	E9	NC
5	11000001	12000000	E10	NC
5	11000001	12000000	E11	NC
5	11000001	12000000	E12	NC
5	11000001	12000000	F1	NC
5	11000001	12000000	F2	NC
5	11000001	12000000	F3	NC
5	11000001	12000000	F4	NC
5	11000001	12000000	F5	NC
5	11000001	12000000	F6	NC
5	11000001	12000000	F7	NC
5	11000001	12000000	F8	NC
5	11000001	12000000	F9	NC
5	11000001	12000000	F10	NC
5	11000001	12000000	F11	NC
5	11000001	12000000	F12	NC
5	11000001	12000000	G1	NC
5	11000001	12000000	G2	NC
5	11000001	12000000	G3	NC
5	11000001	12000000	G4	NC
5	11000001	12000000	G5	NC
5	11000001	12000000	G6	NC
5	11000001	12000000	G7	NC
5	11000001	12000000	G8	NC
5	11000001	12000000	G9	NC
5	11000001	12000000	G10	NC
5	11000001	12000000	G11	NC
5	11000001	12000000	G12	NC
5	11000001	12000000	H1	NC
5	11000001	12000000	H2	NC
5	11000001	12000000	H3	NC
5	11000001	12000000	H4	NC
5	11000001	12000000	H5	NC
5	11000001	12000000	H6	NC
5	11000001	12000000	H7	NC
5	11000001	12000000	H8	NC
5	11000001	12000000	H9	NC
5	11000001	12000000	H10	NC
5	11000001	12000000	H11	NC
5	11000001	12000000	H12	NC
5	12000001	13000000	SAT_5	Tu/Tu
5	12000001	13000000	SAT_6	AB/AB
5	12000001	13000000	A1	NC
5	12000001	13000000	A2	NC
5	12000001	13000000	A3	NC
5	12000001	13000000	A4	NC
5	12000001	13000000	A5	NC
5	12000001	13000000	A6	NC
5	12000001	13000000	A7	NC
5	12000001	13000000	A8	NC
5	12000001	13000000	A9	NC
5	12000001	13000000	A10	NC
5	12000001	13000000	A11	NC
5	12000001	13000000	A12	NC
5	12000001	13000000	B1	NC
5	12000001	13000000	B2	NC
5	12000001	13000000	B3	NC
5	12000001	13000000	B4	NC
5	12000001	13000000	B5	NC
5	12000001	13000000	B6	NC
5	12000001	13000000	B7	NC
5	12000001	13000000	B8	NC
5	12000001	13000000	B9	NC
5	12000001	13000000	B10	NC
5	12000001	13000000	B11	NC
5	12000001	13000000	B12	NC
5	12000001	13000000	C1	NC
5	12000001	13000000	C2	NC
5	12000001	13000000	C3	NC
5	12000001	13000000	C4	NC
5	12000001	13000000	C5	NC
5	12000001	13000000	C6	NC
5	12000001	13000000	C7	NC
5	12000001	13000000	C8	NC
5	12000001	13000000	C9	NC
5	12000001	13000000	C10	NC
5	12000001	13000000	C11	NC
5	12000001	13000000	C12	NC
5	12000001	13000000	D1	NC
5	12000001	13000000	D2	NC
5	12000001	13000000	D3	NC
5	12000001	13000000	D4	NC
5	12000001	13000000	D5	NC
5	12000001	13000000	D6	NC
5	12000001	13000000	D7	NC
5	12000001	13000000	D8	NC
5	12000001	13000000	D9	NC
5	12000001	13000000	D10	NC
5	12000001	13000000	D11	NC
5	12000001	13000000	D12	NC
5	12000001	13000000	E1	NC
5	12000001	13000000	E2	NC
5	12000001	13000000	E3	NC
5	12000001	13000000	E4	NC
5	12000001	13000000	E5	NC
5	12000001	13000000	E6	NC
5	12000001	13000000	E7	NC
5	12000001	13000000	E8	NC
5	12000001	13000000	E9	NC
5	12000001	13000000	E10	NC
5	12000001	13000000	E11	NC
5	12000001	13000000	E12	NC
5	12000001	13000000	F1	NC
5	12000001	13000000	F2	NC
5	12000001	13000000	F3	NC
5	12000001	13000000	F4	NC
5	12000001	13000000	F5	NC
5	12000001	13000000	F6	NC
5	12000001	13000000	F7	NC
5	12000001	13000000	F8	NC
5	12000001	13000000	F9	NC
5	12000001	13000000	F10	NC
5	12000001	13000000	F11	NC
5	12000001	13000000	F12	NC
5	12000001	13000000	G1	NC
5	12000001	13000000	G2	NC
5	12000001	13000000	G3	NC
5	12000001	13000000	G4	NC
5	12000001	13000000	G5	NC
5	12000001	13000000	G6	NC
5	12000001	13000000	G7	NC
5	12000001	13000000	G8	NC
5	12000001	13000000	G9	NC
5	12000001	13000000	G10	NC
5	12000001	13000000	G11	NC
5	12000001	13000000	G12	NC
5	12000001	13000000	H1	NC
5	12000001	13000000	H2	NC
5	12000001	13000000	H3	NC
5	12000001	13000000	H4	NC
5	12000001	13000000	H5	NC
5	12000001	13000000	H6	NC
5	12000001	13000000	H7	NC
5	12000001	13000000	H8	NC
5	12000001	13000000	H9	NC
5	12000001	13000000	H10	NC
5	12000001	13000000	H11	NC
5	12000001	13000000	H12	NC
5	13000001	14000000	SAT_5	Tu/Tu
5	13000001	14000000	SAT_6	AB/AB
5	13000001	14000000	A1	NC
5	13000001	14000000	A2	NC
5	13000001	14000000	A3	NC
5	13000001	14000000	A4	NC
5	13000001	14000000	A5	NC
5	13000001	14000000	A6	NC
5	13000001	14000000	A7	NC
5	13000001	14000000	A8	NC
5	13000001	14000000	A9	NC
5	13000001	14000000	A10	NC
5	13000001	14000000	A11	NC
5	13000001	14000000	A12	NC
5	13000001	14000000	B1	NC
5	13000001	14000000	B2	NC
5	13000001	14000000	B3	NC
5	13000001	14000000	B4	NC
5	13000001	14000000	B5	NC
5	13000001	14000000	B6	NC
5	13000001	14000000	B7	NC
5	13000001	14000000	B8	NC
5	13000001	14000000	B9	NC
5	13000001	14000000	B10	NC
5	13000001	14000000	B11	NC
5	13000001	14000000	B12	NC
5	13000001	14000000	C1	NC
5	13000001	14000000	C2	NC
5	13000001	14000000	C3	NC
5	13000001	14000000	C4	NC
5	13000001	14000000	C5	NC
5	13000001	14000000	C6	NC
5	13000001	14000000	C7	NC
5	13000001	14000000	C8	NC
5	13000001	14000000	C9	NC
5	13000001	14000000	C10	NC
5	13000001	14000000	C11	NC
5	13000001	14000000	C12	NC
5	13000001	14000000	D1	NC
5	13000001	14000000	D2	NC
5	13000001	14000000	D3	NC
5	13000001	14000000	D4	NC
5	13000001	14000000	D5	NC
5	13000001	14000000	D6	NC
5	13000001	14000000	D7	NC
5	13000001	14000000	D8	NC
5	13000001	14000000	D9	NC
5	13000001	14000000	D10	NC
5	13000001	14000000	D11	NC
5	13000001	14000000	D12	NC
5	13000001	14000000	E1	NC
5	13000001	14000000	E2	NC
5	13000001	14000000	E3	NC
5	13000001	14000000	E4	NC
5	13000001	14000000	E5	NC
5	13000001	14000000	E6	NC
5	13000001	14000000	E7	NC
5	13000001	14000000	E8	NC
5	13000001	14000000	E9	NC
5	13000001	14000000	E10	NC
5	13000001	14000000	E11	NC
5	13000001	14000000	E12	NC
5	13000001	14000000	F1	NC
5	13000001	14000000	F2	NC
5	13000001	14000000	F3	NC
5	13000001	14000000	F4	NC
5	13000001	14000000	F5	NC
5	13000001	14000000	F6	NC
5	13000001	14000000	F7	NC
5	13000001	14000000	F8	NC
5	13000001	14000000	F9	NC
5	13000001	14000000	F10	NC
5	13000001	14000000	F11	NC
5	13000001	14000000	F12	NC
5	13000001	14000000	G1	NC
5	13000001	14000000	G2	NC
5	13000001	14000000	G3	NC
5	13000001	14000000	G4	NC
5	13000001	14000000	G5	NC
5	13000001	14000000	G6	NC
5	13000001	14000000	G7	NC
5	13000001	14000000	G8	NC
5	13000001	14000000	G9	NC
5	13000001	14000000	G10	NC
5	13000001	14000000	G11	NC
5	13000001	14000000	G12	NC
5	13000001	14000000	H1	NC
5	13000001	14000000	H2	NC
5	13000001	14000000	H3	NC
5	13000001	14000000	H4	NC
5	13000001	14000000	H5	NC
5	13000001	14000000	H6	NC
5	13000001	14000000	H7	NC
5	13000001	14000000	H8	NC
5	13000001	14000000	H9	NC
5	13000001	14000000	H10	NC
5	13000001	14000000	H11	NC
5	13000001	14000000	H12	NC
5	14000001	15000000	SAT_5	Tu/Tu
5	14000001	15000000	SAT_6	AB/AB
5	14000001	15000000	A1	NC
5	14000001	15000000	A2	NC
5	14000001	15000000	A3	NC
5	14000001	15000000	A4	NC
5	14000001	15000000	A5	NC
5	14000001	15000000	A6	NC
5	14000001	15000000	A7	NC
5	14000001	15000000	A8	NC
5	14000001	15000000	A9	NC
5	14000001	15000000	A10	NC
5	14000001	15000000	A11	NC
5	14000001	15000000	A12	NC
5	14000001	15000000	B1	NC
5	14000001	15000000	B2	NC
5	14000001	15000000	B3	NC
5	14000001	15000000	B4	NC
5	14000001	15000000	B5	NC
5	14000001	15000000	B6	NC
5	14000001	15000000	B7	NC
5	14000001	15000000	B8	NC
5	14000001	15000000	B9	NC
5	14000001	15000000	B10	NC
5	14000001	15000000	B11	NC
5	14000001	15000000	B12	NC
5	14000001	15000000	C1	NC
5	14000001	15000000	C2	NC
5	14000001	15000000	C3	NC
5	14000001	15000000	C4	NC
5	14000001	15000000	C5	NC
5	14000001	15000000	C6	NC
5	14000001	15000000	C7	NC
5	14000001	15000000	C8	NC
5	14000001	15000000	C9	NC
5	14000001	15000000	C10	NC
5	14000001	15000000	C11	NC
5	14000001	15000000	C12	NC
5	14000001	15000000	D1	NC
5	14000001	15000000	D2	NC
5	14000001	15000000	D3	NC
5	14000001	15000000	D4	NC
5	14000001	15000000	D5	NC
5	14000001	15000000	D6	NC
5	14000001	15000000	D7	NC
5	14000001	15000000	D8	NC
5	14000001	15000000	D9	NC
5	14000001	15000000	D10	NC
5	14000001	15000000	D11	NC
5	14000001	15000000	D12	NC
5	14000001	15000000	E1	NC
5	14000001	15000000	E2	NC
5	14000001	15000000	E3	NC
5	14000001	15000000	E4	NC
5	14000001	15000000	E5	NC
5	14000001	15000000	E6	NC
5	14000001	15000000	E7	NC
5	14000001	15000000	E8	NC
5	14000001	15000000	E9	NC
5	14000001	15000000	E10	NC
5	14000001	15000000	E11	NC
5	14000001	15000000	E12	NC
5	14000001	15000000	F1	NC
5	14000001	15000000	F2	NC
5	14000001	15000000	F3	NC
5	14000001	15000000	F4	NC
5	14000001	15000000	F5	NC
5	14000001	15000000	F6	NC
5	14000001	15000000	F7	NC
5	14000001	15000000	F8	NC
5	14000001	15000000	F9	NC
5	14000001	15000000	F10	NC
5	14000001	15000000	F11	NC
5	14000001	15000000	F12	NC
5	14000001	15000000	G1	NC
5	14000001	15000000	G2	NC
5	14000001	15000000	G3	NC
5	14000001	15000000	G4	NC
5	14000001	15000000	G5	NC
5	14000001	15000000	G6	NC
5	14000001	15000000	G7	NC
5	14000001	15000000	G8	NC
5	14000001	15000000	G9	NC
5	14000001	15000000	G10	NC
5	14000001	15000000	G11	NC
5	14000001	15000000	G12	NC
5	14000001	15000000	H1	NC
5	14000001	15000000	H2	NC
5	14000001	15000000	H3	NC
5	14000001	15000000	H4	NC
5	14000001	15000000	H5	NC
5	14000001	15000000	H6	NC
5	14000001	15000000	H7	NC
5	14000001	15000000	H8	NC
5	14000001	15000000	H9	NC
5	14000001	15000000	H10	NC
5	14000001	15000000	H11	NC
5	14000001	15000000	H12	NC
5	15000001	16000000	SAT_5	Tu/Tu
5	15000001	16000000	SAT_6	AB/AB
5	15000001	16000000	A1	NC
5	15000001	16000000	A2	NC
5	15000001	16000000	A3	NC
5	15000001	16000000	A4	NC
5	15000001	16000000	A5	NC
5	15000001	16000000	A6	NC
5	15000001	16000000	A7	NC
5	15000001	16000000	A8	NC
5	15000001	16000000	A9	NC
5	15000001	16000000	A10	NC
5	15000001	16000000	A11	NC
5	15000001	16000000	A12	NC
5	15000001	16000000	B1	NC
5	15000001	16000000	B2	NC
5	15000001	16000000	B3	NC
5	15000001	16000000	B4	NC
5	15000001	16000000	B5	NC
5	15000001	16000000	B6	NC
5	15000001	16000000	B7	NC
5	15000001	16000000	B8	NC
5	15000001	16000000	B9	NC
5	15000001	16000000	B10	NC
5	15000001	16000000	B11	NC
5	15000001	16000000	B12	NC
5	15000001	16000000	C1	NC
5	15000001	16000000	C2	NC
5	15000001	16000000	C3	NC
5	15000001	16000000	C4	NC
5	15000001	16000000	C5	NC
5	15000001	16000000	C6	NC
5	15000001	16000000	C7	NC
5	15000001	16000000	C8	NC
5	15000001	16000000	C9	NC
5	15000001	16000000	C10	NC
5	15000001	16000000	C11	NC
5	15000001	16000000	C12	NC
5	15000001	16000000	D1	NC
5	15000001	16000000	D2	NC
5	15000001	16000000	D3	NC
5	15000001	16000000	D4	NC
5	15000001	16000000	D5	NC
5	15000001	16000000	D6	NC
5	15000001	16000000	D7	NC
5	15000001	16000000	D8	NC
5	15000001	16000000	D9	NC
5	15000001	16000000	D10	NC
5	15000001	16000000	D11	NC
5	15000001	16000000	D12	NC
5	15000001	16000000	E1	NC
5	15000001	16000000	E2	NC
5	15000001	16000000	E3	NC
5	15000001	16000000	E4	NC
5	15000001	16000000	E5	NC
5	15000001	16000000	E6	NC
5	15000001	16000000	E7	NC
5	15000001	16000000	E8	NC
5	15000001	16000000	E9	NC
5	15000001	16000000	E10	NC
5	15000001	16000000	E11	NC
5	15000001	16000000	E12	NC
5	15000001	16000000	F1	NC
5	15000001	16000000	F2	NC
5	15000001	16000000	F3	NC
5	15000001	16000000	F4	NC
5	15000001	16000000	F5	NC
5	15000001	16000000	F6	NC
5	15000001	16000000	F7	NC
5	15000001	16000000	F8	NC
5	15000001	16000000	F9	NC
5	15000001	16000000	F10	NC
5	15000001	16000000	F11	NC
5	15000001	16000000	F12	NC
5	15000001	16000000	G1	NC
5	15000001	16000000	G2	NC
5	15000001	16000000	G3	NC
5	15000001	16000000	G4	NC
5	15000001	16000000	G5	NC
5	15000001	16000000	G6	NC
5	15000001	16000000	G7	NC
5	15000001	16000000	G8	NC
5	15000001	16000000	G9	NC
5	15000001	16000000	G10	NC
5	15000001	16000000	G11	NC
5	15000001	16000000	G12	NC
5	15000001	16000000	H1	NC
5	15000001	16000000	H2	NC
5	15000001	16000000	H3	NC
5	15000001	16000000	H4	NC
5	15000001	16000000	H5	NC
5	15000001	16000000	H6	NC
5	15000001	16000000	H7	NC
5	15000001	16000000	H8	NC
5	15000001	16000000	H9	NC
5	15000001	16000000	H10	NC
5	15000001	16000000	H11	NC
5	15000001	16000000	H12	NC
5	16000001	17000000	SAT_5	Tu/Tu
5	16000001	17000000	SAT_6	Tu/Tu
5	16000001	17000000	A1	Tu/Tu
5	16000001	17000000	A2	Tu/Tu
5	16000001	17000000	A3	Tu/Tu
5	16000001	17000000	A4	Tu/Tu
5	16000001	17000000	A5	Tu/Tu
5	16000001	17000000	A6	Tu/Tu
5	16000001	17000000	A7	Tu/Tu
5	16000001	17000000	A8	Tu/Tu
5	16000001	17000000	A9	Tu/Tu
5	16000001	17000000	A10	Tu/Tu
5	16000001	17000000	A11	Tu/Tu
5	16000001	17000000	A12	Tu/Tu
5	16000001	17000000	B1	Tu/Tu
5	16000001	17000000	B2	Tu/Tu
5	16000001	17000000	B3	Tu/Tu
5	16000001	17000000	B4	Tu/Tu
5	16000001	17000000	B5	Tu/Tu
5	16000001	17000000	B6	Tu/Tu
5	16000001	17000000	B7	Tu/Tu
5	16000001	17000000	B8	Tu/Tu
5	16000001	17000000	B9	Tu/Tu
5	16000001	17000000	B10	Tu/Tu
5	16000001	17000000	B11	Tu/Tu
5	16000001	17000000	B12	Tu/Tu
5	16000001	17000000	C1	Tu/Tu
5	16000001	17000000	C2	Tu/Tu
5	16000001	17000000	C3	Tu/Tu
5	16000001	17000000	C4	Tu/Tu
5	16000001	17000000	C5	Tu/Tu
5	16000001	17000000	C6	Tu/Tu
5	16000001	17000000	C7	Tu/Tu
5	16000001	17000000	C8	Tu/Tu
5	16000001	17000000	C9	Tu/Tu
5	16000001	17000000	C10	Tu/Tu
5	16000001	17000000	C11	Tu/Tu
5	16000001	17000000	C12	Tu/Tu
5	16000001	17000000	D1	Tu/Tu
5	16000001	17000000	D2	Tu/Tu
5	16000001	17000000	D3	Tu/Tu
5	16000001	17000000	D4	Tu/Tu
5	16000001	17000000	D5	Tu/Tu
5	16000001	17000000	D6	Tu/Tu
5	16000001	17000000	D7	Tu/Tu
5	16000001	17000000	D8	Tu/Tu
5	16000001	17000000	D9	Tu/Tu
5	16000001	17000000	D10	Tu/Tu
5	16000001	17000000	D11	Tu/Tu
5	16000001	17000000	D12	Tu/Tu
5	16000001	17000000	E1	Tu/Tu
5	16000001	17000000	E2	Tu/Tu
5	16000001	17000000	E3	Tu/Tu
5	16000001	17000000	E4	Tu/Tu
5	16000001	17000000	E5	Tu/Tu
5	16000001	17000000	E6	Tu/Tu
5	16000001	17000000	E7	Tu/Tu
5	16000001	17000000	E8	Tu/Tu
5	16000001	17000000	E9	Tu/Tu
5	16000001	17000000	E10	Tu/Tu
5	16000001	17000000	E11	Tu/Tu
5	16000001	17000000	E12	Tu/Tu
5	16000001	17000000	F1	Tu/Tu
5	16000001	17000000	F2	Tu/Tu
5	16000001	17000000	F3	Tu/Tu
5	16000001	17000000	F4	Tu/Tu
5	16000001	17000000	F5	Tu/Tu
5	16000001	17000000	F6	Tu/Tu
5	16000001	17000000	F7	Tu/Tu
5	16000001	17000000	F8	Tu/Tu
5	16000001	17000000	F9	Tu/Tu
5	16000001	17000000	F10	Tu/Tu
5	16000001	17000000	F11	Tu/Tu
5	16000001	17000000	F12	Tu/Tu
5	16000001	17000000	G1	Tu/Tu
5	16000001	17000000	G2	Tu/Tu
5	16000001	17000000	G3	Tu/Tu
5	16000001	17000000	G4	Tu/Tu
5	16000001	17000000	G5	Tu/Tu
5	16000001	17000000	G6	Tu/Tu
5	16000001	17000000	G7	Tu/Tu
5	16000001	17000000	G8	Tu/Tu
5	16000001	17000000	G9	Tu/Tu
5	16000001	17000000	G10	Tu/Tu
5	16000001	17000000	G11	Tu/Tu
5	16000001	17000000	G12	Tu/Tu
5	16000001	17000000	H1	Tu/Tu
5	16000001	17000000	H2	Tu/Tu
5	16000001	17000000	H3	Tu/Tu
5	16000001	17000000	H4	Tu/Tu
5	16000001	17000000	H5	Tu/Tu
5	16000001	17000000	H6	Tu/Tu
5	16000001	17000000	H7	Tu/Tu
5	16000001	17000000	H8	Tu/Tu
5	16000001	17000000	H9	Tu/Tu
5	16000001	17000000	H10	Tu/Tu
5	16000001	17000000	H11	Tu/Tu
5	16000001	17000000	H12	Tu/Tu
5	17000001	18000000	SAT_5	Tu/Tu
5	17000001	18000000	SAT_6	Tu/Tu
5	17000001	18000000	A1	Tu/Tu
5	17000001	18000000	A2	Tu/Tu
5	17000001	18000000	A3	Tu/Tu
5	17000001	18000000	A4	Tu/Tu
5	17000001	18000000	A5	Tu/Tu
5	17000001	18000000	A6	Tu/Tu
5	17000001	18000000	A7	Tu/Tu
5	17000001	18000000	A8	Tu/Tu
5	17000001	18000000	A9	Tu/Tu
5	17000001	18000000	A10	Tu/Tu
5	17000001	18000000	A11	Tu/Tu
5	17000001	18000000	A12	Tu/Tu
5	17000001	18000000	B1	Tu/Tu
5	17000001	18000000	B2	Tu/Tu
5	17000001	18000000	B3	Tu/Tu
5	17000001	18000000	B4	Tu/Tu
5	17000001	18000000	B5	Tu/Tu
5	17000001	18000000	B6	Tu/Tu
5	17000001	18000000	B7	Tu/Tu
5	17000001	18000000	B8	Tu/Tu
5	17000001	18000000	B9	Tu/Tu
5	17000001	18000000	B10	Tu/Tu
5	17000001	18000000	B11	Tu/Tu
5	17000001	18000000	B12	Tu/Tu
5	17000001	18000000	C1	Tu/Tu
5	17000001	18000000	C2	Tu/Tu
5	17000001	18000000	C3	Tu/Tu
5	17000001	18000000	C4	Tu/Tu
5	17000001	18000000	C5	Tu/Tu
5	17000001	18000000	C6	Tu/Tu
5	17000001	18000000	C7	Tu/Tu
5	17000001	18000000	C8	Tu/Tu
5	17000001	18000000	C9	Tu/Tu
5	17000001	18000000	C10	Tu/Tu
5	17000001	18000000	C11	Tu/Tu
5	17000001	18000000	C12	Tu/Tu
5	17000001	18000000	D1	Tu/Tu
5	17000001	18000000	D2	Tu/Tu
5	17000001	18000000	D3	Tu/Tu
5	17000001	18000000	D4	Tu/Tu
5	17000001	18000000	D5	Tu/Tu
5	17000001	18000000	D6	Tu/Tu
5	17000001	18000000	D7	Tu/Tu
5	17000001	18000000	D8	Tu/Tu
5	17000001	18000000	D9	Tu/Tu
5	17000001	18000000	D10	Tu/Tu
5	17000001	18000000	D11	Tu/Tu
5	17000001	18000000	D12	Tu/Tu
5	17000001	18000000	E1	Tu/Tu
5	17000001	18000000	E2	Tu/Tu
5	17000001	18000000	E3	Tu/Tu
5	17000001	18000000	E4	Tu/Tu
5	17000001	18000000	E5	Tu/Tu
5	17000001	18000000	E6	Tu/Tu
5	17000001	18000000	E7	Tu/Tu
5	17000001	18000000	E8	Tu/Tu
5	17000001	18000000	E9	Tu/Tu
5	17000001	18000000	E10	Tu/Tu
5	17000001	18000000	E11	Tu/Tu
5	17000001	18000000	E12	Tu/Tu
5	17000001	18000000	F1	Tu/Tu
5	17000001	18000000	F2	Tu/Tu
5	17000001	18000000	F3	Tu/Tu
5	17000001	18000000	F4	Tu/Tu
5	17000001	18000000	F5	Tu/Tu
5	17000001	18000000	F6	Tu/Tu
5	17000001	18000000	F7	Tu/Tu
5	17000001	18000000	F8	Tu/Tu
5	17000001	18000000	F9	Tu/Tu
5	17000001	18000000	F10	Tu/Tu
5	17000001	18000000	F11	Tu/Tu
5	17000001	18000000	F12	Tu/Tu
5	17000001	18000000	G1	Tu/Tu
5	17000001	18000000	G2	Tu/Tu
5	17000001	18000000	G3	Tu/Tu
5	17000001	18000000	G4	Tu/Tu
5	17000001	18000000	G5	Tu/Tu
5	17000001	18000000	G6	Tu/Tu
5	17000001	18000000	G7	Tu/Tu
5	17000001	18000000	G8	Tu/Tu
5	17000001	18000000	G9	Tu/Tu
5	17000001	18000000	G10	Tu/Tu
5	17000001	18000000	G11	Tu/Tu
5	17000001	18000000	G12	Tu/Tu
5	17000001	18000000	H1	Tu/Tu
5	17000001	18000000	H2	Tu/Tu
5	17000001	18000000	H3	Tu/Tu
5	17000001	18000000	H4	Tu/Tu
5	17000001	18000000	H5	Tu/Tu
5	17000001	18000000	H6	Tu/Tu
5	17000001	18000000	H7	Tu/Tu
5	17000001	18000000	H8	Tu/Tu
5	17000001	18000000	H9	Tu/Tu
5	17000001	18000000	H10	Tu/Tu
5	17000001	18000000	H11	Tu/Tu
5	17000001	18000000	H12	Tu/Tu
5	18000001	19000000	SAT_5	Tu/Tu
5	18000001	19000000	SAT_6	Tu/Tu
5	18000001	19000000	A1	Tu/Tu
5	18000001	19000000	A2	Tu/Tu
5	18000001	19000000	A3	Tu/Tu
5	18000001	19000000	A4	Tu/Tu
5	18000001	19000000	A5	Tu/Tu
5	18000001	19000000	A6	Tu/Tu
5	18000001	19000000	A7	Tu/Tu
5	18000001	19000000	A8	Tu/Tu
5	18000001	19000000	A9	Tu/Tu
5	18000001	19000000	A10	Tu/Tu
5	18000001	19000000	A11	Tu/Tu
5	18000001	19000000	A12	Tu/Tu
5	18000001	19000000	B1	Tu/Tu
5	18000001	19000000	B2	Tu/Tu
5	18000001	19000000	B3	Tu/Tu
5	18000001	19000000	B4	Tu/Tu
5	18000001	19000000	B5	Tu/Tu
5	18000001	19000000	B6	Tu/Tu
5	18000001	19000000	B7	Tu/Tu
5	18000001	19000000	B8	Tu/Tu
5	18000001	19000000	B9	Tu/Tu
5	18000001	19000000	B10	Tu/Tu
5	18000001	19000000	B11	Tu/Tu
5	18000001	19000000	B12	Tu/Tu
5	18000001	19000000	C1	Tu/Tu
5	18000001	19000000	C2	Tu/Tu
5	18000001	19000000	C3	Tu/Tu
5	18000001	19000000	C4	Tu/Tu
5	18000001	19000000	C5	Tu/Tu
5	18000001	19000000	C6	Tu/Tu
5	18000001	19000000	C7	Tu/Tu
5	18000001	19000000	C8	Tu/Tu
5	18000001	19000000	C9	Tu/Tu
5	18000001	19000000	C10	Tu/Tu
5	18000001	19000000	C11	Tu/Tu
5	18000001	19000000	C12	Tu/Tu
5	18000001	19000000	D1	Tu/Tu
5	18000001	19000000	D2	Tu/Tu
5	18000001	19000000	D3	Tu/Tu
5	18000001	19000000	D4	Tu/Tu
5	18000001	19000000	D5	Tu/Tu
5	18000001	19000000	D6	Tu/Tu
5	18000001	19000000	D7	Tu/Tu
5	18000001	19000000	D8	Tu/Tu
5	18000001	19000000	D9	Tu/Tu
5	18000001	19000000	D10	Tu/Tu
5	18000001	19000000	D11	Tu/Tu
5	18000001	19000000	D12	Tu/Tu
5	18000001	19000000	E1	Tu/Tu
5	18000001	19000000	E2	Tu/Tu
5	18000001	19000000	E3	Tu/Tu
5	18000001	19000000	E4	Tu/Tu
5	18000001	19000000	E5	Tu/Tu
5	18000001	19000000	E6	Tu/Tu
5	18000001	19000000	E7	Tu/Tu
5	18000001	19000000	E8	Tu/Tu
5	18000001	19000000	E9	Tu/Tu
5	18000001	19000000	E10	Tu/Tu
5	18000001	19000000	E11	Tu/Tu
5	18000001	19000000	E12	Tu/Tu
5	18000001	19000000	F1	Tu/Tu
5	18000001	19000000	F2	Tu/Tu
5	18000001	19000000	F3	Tu/Tu
5	18000001	19000000	F4	Tu/Tu
5	18000001	19000000	F5	Tu/Tu
5	18000001	19000000	F6	Tu/Tu
5	18000001	19000000	F7	Tu/Tu
5	18000001	19000000	F8	Tu/Tu
5	18000001	19000000	F9	Tu/Tu
5	18000001	19000000	F10	Tu/Tu
5	18000001	19000000	F11	Tu/Tu
5	18000001	19000000	F12	Tu/Tu
5	18000001	19000000	G1	Tu/Tu
5	18000001	19000000	G2	Tu/Tu
5	18000001	19000000	G3	Tu/Tu
5	18000001	19000000	G4	Tu/Tu
5	18000001	19000000	G5	Tu/Tu
5	18000001	19000000	G6	Tu/Tu
5	18000001	19000000	G7	Tu/Tu
5	18000001	19000000	G8	Tu/Tu
5	18000001	19000000	G9	Tu/Tu
5	18000001	19000000	G10	Tu/Tu
5	18000001	19000000	G11	Tu/Tu
5	18000001	19000000	G12	Tu/Tu
5	18000001	19000000	H1	Tu/Tu
5	18000001	19000000	H2	Tu/Tu
5	18000001	19000000	H3	Tu/Tu
5	18000001	19000000	H4	Tu/Tu
5	18000001	19000000	H5	Tu/Tu
5	18000001	19000000	H6	Tu/Tu
5	18000001	19000000	H7	Tu/Tu
5	18000001	19000000	H8	Tu/Tu
5	18000001	19000000	H9	Tu/Tu
5	18000001	19000000	H10	Tu/Tu
5	18000001	19000000	H11	Tu/Tu
5	18000001	19000000	H12	Tu/Tu
5	19000001	20000000	SAT_5	Tu/Tu
5	19000001	20000000	SAT_6	Tu/Tu
5	19000001	20000000	A1	Tu/Tu
5	19000001	20000000	A2	Tu/Tu
5	19000001	20000000	A3	Tu/Tu
5	19000001	20000000	A4	Tu/Tu
5	19000001	20000000	A5	Tu/Tu
5	19000001	20000000	A6	Tu/Tu
5	19000001	20000000	A7	Tu/Tu
5	19000001	20000000	A8	Tu/Tu
5	19000001	20000000	A9	Tu/Tu
5	19000001	20000000	A10	Tu/Tu
5	19000001	20000000	A11	Tu/Tu
5	19000001	20000000	A12	Tu/Tu
5	19000001	20000000	B1	Tu/Tu
5	19000001	20000000	B2	Tu/Tu
5	19000001	20000000	B3	Tu/Tu
5	19000001	20000000	B4	Tu/Tu
5	19000001	20000000	B5	Tu/Tu
5	19000001	20000000	B6	Tu/Tu
5	19000001	20000000	B7	Tu/Tu
5	19000001	20000000	B8	Tu/Tu
5	19000001	20000000	B9	Tu/Tu
5	19000001	20000000	B10	Tu/Tu
5	19000001	20000000	B11	Tu/Tu
5	19000001	20000000	B12	Tu/Tu
5	19000001	20000000	C1	Tu/Tu
5	19000001	20000000	C2	Tu/Tu
5	19000001	20000000	C3	Tu/Tu
5	19000001	20000000	C4	Tu/Tu
5	19000001	20000000	C5	Tu/Tu
5	19000001	20000000	C6	Tu/Tu
5	19000001	20000000	C7	Tu/Tu
5	19000001	20000000	C8	Tu/Tu
5	19000001	20000000	C9	Tu/Tu
5	19000001	20000000	C10	Tu/Tu
5	19000001	20000000	C11	Tu/Tu
5	19000001	20000000	C12	Tu/Tu
5	19000001	20000000	D1	Tu/Tu
5	19000001	20000000	D2	Tu/Tu
5	19000001	20000000	D3	Tu/Tu
5	19000001	20000000	D4	Tu/Tu
5	19000001	20000000	D5	Tu/Tu
5	19000001	20000000	D6	Tu/Tu
5	19000001	20000000	D7	Tu/Tu
5	19000001	20000000	D8	Tu/Tu
5	19000001	20000000	D9	Tu/Tu
5	19000001	20000000	D10	Tu/Tu
5	19000001	20000000	D11	Tu/Tu
5	19000001	20000000	D12	Tu/Tu
5	19000001	20000000	E1	Tu/Tu
5	19000001	20000000	E2	Tu/Tu
5	19000001	20000000	E3	Tu/Tu
5	19000001	20000000	E4	Tu/Tu
5	19000001	20000000	E5	Tu/Tu
5	19000001	20000000	E6	Tu/Tu
5	19000001	20000000	E7	Tu/Tu
5	19000001	20000000	E8	Tu/Tu
5	19000001	20000000	E9	Tu/Tu
5	19000001	20000000	E10	Tu/Tu
5	19000001	20000000	E11	Tu/Tu
5	19000001	20000000	E12	Tu/Tu
5	19000001	20000000	F1	Tu/Tu
5	19000001	20000000	F2	Tu/Tu
5	19000001	20000000	F3	Tu/Tu
5	19000001	20000000	F4	Tu/Tu
5	19000001	20000000	F5	Tu/Tu
5	19000001	20000000	F6	Tu/Tu
5	19000001	20000000	F7	Tu/Tu
5	19000001	20000000	F8	Tu/Tu
5	19000001	20000000	F9	Tu/Tu
5	19000001	20000000	F10	Tu/Tu
5	19000001	20000000	F11	Tu/Tu
5	19000001	20000000	F12	Tu/Tu
5	19000001	20000000	G1	Tu/Tu
5	19000001	20000000	G2	Tu/Tu
5	19000001	20000000	G3	Tu/Tu
5	19000001	20000000	G4	Tu/Tu
5	19000001	20000000	G5	Tu/Tu
5	19000001	20000000	G6	Tu/Tu
5	19000001	20000000	G7	Tu/Tu
5	19000001	20000000	G8	Tu/Tu
5	19000001	20000000	G9	Tu/Tu
5	19000001	20000000	G10	Tu/Tu
5	19000001	20000000	G11	Tu/Tu
5	19000001	20000000	G12	Tu/Tu
5	19000001	20000000	H1	Tu/Tu
5	19000001	20000000	H2	Tu/Tu
5	19000001	20000000	H3	Tu/Tu
5	19000001	20000000	H4	Tu/Tu
5	19000001	20000000	H5	Tu/Tu
5	19000001	20000000	H6	Tu/Tu
5	19000001	20000000	H7	Tu/Tu
5	19000001	20000000	H8	Tu/Tu
5	19000001	20000000	H9	Tu/Tu
5	19000001	20000000	H10	Tu/Tu
5	19000001	20000000	H11	Tu/Tu
5	19000001	20000000	H12	Tu/Tu
5	20000001	21000000	SAT_5	Tu/Tu
5	20000001	21000000	SAT_6	Tu/Tu
5	20000001	21000000	A1	Tu/Tu
5	20000001	21000000	A2	Tu/Tu
5	20000001	21000000	A3	Tu/Tu
5	20000001	21000000	A4	Tu/Tu
5	20000001	21000000	A5	Tu/Tu
5	20000001	21000000	A6	Tu/Tu
5	20000001	21000000	A7	Tu/Tu
5	20000001	21000000	A8	Tu/Tu
5	20000001	21000000	A9	Tu/Tu
5	20000001	21000000	A10	Tu/Tu
5	20000001	21000000	A11	Tu/Tu
5	20000001	21000000	A12	Tu/Tu
5	20000001	21000000	B1	Tu/Tu
5	20000001	21000000	B2	Tu/Tu
5	20000001	21000000	B3	Tu/Tu
5	20000001	21000000	B4	Tu/Tu
5	20000001	21000000	B5	Tu/Tu
5	20000001	21000000	B6	Tu/Tu
5	20000001	21000000	B7	Tu/Tu
5	20000001	21000000	B8	Tu/Tu
5	20000001	21000000	B9	Tu/Tu
5	20000001	21000000	B10	Tu/Tu
5	20000001	21000000	B11	Tu/Tu
5	20000001	21000000	B12	Tu/Tu
5	20000001	21000000	C1	Tu/Tu
5	20000001	21000000	C2	Tu/Tu
5	20000001	21000000	C3	Tu/Tu
5	20000001	21000000	C4	Tu/Tu
5	20000001	21000000	C5	Tu/Tu
5	20000001	21000000	C6	Tu/Tu
5	20000001	21000000	C7	Tu/Tu
5	20000001	21000000	C8	Tu/Tu
5	20000001	21000000	C9	Tu/Tu
5	20000001	21000000	C10	Tu/Tu
5	20000001	21000000	C11	Tu/Tu
5	20000001	21000000	C12	Tu/Tu
5	20000001	21000000	D1	Tu/Tu
[truncated: 5,155 more rows]
