# Supplementary material for: Allele-specific gene expression can underlie altered transcript abundance in zebrafish mutants
Source: eLife. 2022 Feb 17;11:e72825. doi: 10.7554/eLife.72825 (PMC8884726; doi:10.7554/eLife.72825)
Supplement: Figure 3—source data 2. — Normalised counts for myhc4 (ENSDARG00000035438) in wild-type SAT cross. [file elife-72825-fig3-data2.xlsx]

## Sheet: ENSDARG00000035438-counts
sample	condition	normalised_count
zmp_ph209_A1	AB/Tu	591.81
zmp_ph209_A10	AB/Tu	1287.32
zmp_ph209_A12	AB/Tu	1591.83
zmp_ph209_A2	AB/Tu	1194.54
zmp_ph209_A5	AB/Tu	928.667
zmp_ph209_A7	AB/Tu	1032.33
zmp_ph209_A8	AB/Tu	929.554
zmp_ph209_A9	AB/Tu	1240.61
zmp_ph209_B11	AB/Tu	787.434
zmp_ph209_B2	AB/Tu	1228.26
zmp_ph209_B3	AB/Tu	1058.23
zmp_ph209_B4	AB/Tu	971.464
zmp_ph209_B6	AB/Tu	1215.4
zmp_ph209_C10	AB/Tu	620.22
zmp_ph209_C11	AB/Tu	945.184
zmp_ph209_C12	AB/Tu	1193.67
zmp_ph209_C3	AB/Tu	819.026
zmp_ph209_C4	AB/Tu	715.272
zmp_ph209_C5	AB/Tu	1008.71
zmp_ph209_C7	AB/Tu	15.1562
zmp_ph209_C8	AB/Tu	892.94
zmp_ph209_D10	AB/Tu	912.065
zmp_ph209_D12	AB/Tu	999.929
zmp_ph209_D2	AB/Tu	986.016
zmp_ph209_D3	AB/Tu	738.37
zmp_ph209_D5	AB/Tu	616.272
zmp_ph209_D8	AB/Tu	1122.77
zmp_ph209_D9	AB/Tu	1159.4
zmp_ph209_E1	AB/Tu	1141.97
zmp_ph209_E10	AB/Tu	864.873
zmp_ph209_E11	AB/Tu	1017.58
zmp_ph209_E12	AB/Tu	1281.77
zmp_ph209_E2	AB/Tu	698.275
zmp_ph209_E3	AB/Tu	885.39
zmp_ph209_E4	AB/Tu	1016.37
zmp_ph209_E6	AB/Tu	608.337
zmp_ph209_F1	AB/Tu	1020.54
zmp_ph209_F10	AB/Tu	1052.45
zmp_ph209_F3	AB/Tu	519.431
zmp_ph209_F4	AB/Tu	667.676
zmp_ph209_F5	AB/Tu	585.065
zmp_ph209_F6	AB/Tu	691.872
zmp_ph209_F7	AB/Tu	633.013
zmp_ph209_F8	AB/Tu	732.761
zmp_ph209_G10	AB/Tu	875.616
zmp_ph209_G11	AB/Tu	859.386
zmp_ph209_G2	AB/Tu	669.512
zmp_ph209_G3	AB/Tu	823.762
zmp_ph209_G4	AB/Tu	789.068
zmp_ph209_G5	AB/Tu	912.685
zmp_ph209_G7	AB/Tu	848.959
zmp_ph209_G9	AB/Tu	853.288
zmp_ph209_H1	AB/Tu	1122.7
zmp_ph209_H10	AB/Tu	949.507
zmp_ph209_H12	AB/Tu	1164.03
zmp_ph209_H2	AB/Tu	918.44
zmp_ph209_H3	AB/Tu	993.819
zmp_ph209_H4	AB/Tu	781.661
zmp_ph209_H9	AB/Tu	914.754
zmp_ph209_A11	Tu/Tu	20.1384
zmp_ph209_A3	Tu/Tu	13.1223
zmp_ph209_A4	Tu/Tu	15.2728
zmp_ph209_A6	Tu/Tu	12.9334
zmp_ph209_B1	Tu/Tu	80.9904
zmp_ph209_B10	Tu/Tu	18.2071
zmp_ph209_B12	Tu/Tu	19.2507
zmp_ph209_B5	Tu/Tu	6.3364
zmp_ph209_B7	Tu/Tu	9.72967
zmp_ph209_B8	Tu/Tu	21.0774
zmp_ph209_B9	Tu/Tu	8.87074
zmp_ph209_C1	Tu/Tu	12.6721
zmp_ph209_C2	Tu/Tu	10.3675
zmp_ph209_C6	Tu/Tu	20.3293
zmp_ph209_C9	Tu/Tu	10.8386
zmp_ph209_D1	Tu/Tu	21.7427
zmp_ph209_D11	Tu/Tu	12.5155
zmp_ph209_D4	Tu/Tu	14.3038
zmp_ph209_D6	Tu/Tu	18.8879
zmp_ph209_D7	Tu/Tu	20.1082
zmp_ph209_E5	Tu/Tu	676.747
zmp_ph209_E7	Tu/Tu	16.9508
zmp_ph209_E8	Tu/Tu	31.4168
zmp_ph209_E9	Tu/Tu	12.1648
zmp_ph209_F11	Tu/Tu	7.57819
zmp_ph209_F12	Tu/Tu	11.915
zmp_ph209_F2	Tu/Tu	14.9966
zmp_ph209_F9	Tu/Tu	16.4423
zmp_ph209_G1	Tu/Tu	29.2945
zmp_ph209_G12	Tu/Tu	24.4245
zmp_ph209_G6	Tu/Tu	6.54182
zmp_ph209_G8	Tu/Tu	13.3045
zmp_ph209_H11	Tu/Tu	13.1608
zmp_ph209_H5	Tu/Tu	9.66125
zmp_ph209_H6	Tu/Tu	33.9405
zmp_ph209_H7	Tu/Tu	23.1907
zmp_ph209_H8	Tu/Tu	21.158
