# Supplementary material for: Allele-specific gene expression can underlie altered transcript abundance in zebrafish mutants
Source: eLife. 2022 Feb 17;11:e72825. doi: 10.7554/eLife.72825 (PMC8884726; doi:10.7554/eLife.72825)
Supplement: Figure 3—source data 3. — Normalised counts for slc4a4a (ENSDARG00000013730) in wild-type SAT cross. [file elife-72825-fig3-data3.xlsx]

## Sheet: ENSDARG00000013730-counts
sample	condition	normalised_count
zmp_ph209_A1	AB/AB	1343.11
zmp_ph209_A10	AB/AB	1510.53
zmp_ph209_A12	AB/AB	1601.52
zmp_ph209_A7	AB/AB	1654.33
zmp_ph209_A8	AB/AB	1626.72
zmp_ph209_B11	AB/AB	1791.7
zmp_ph209_B3	AB/AB	1638.42
zmp_ph209_B6	AB/AB	1558.9
zmp_ph209_C4	AB/AB	1423.25
zmp_ph209_C7	AB/AB	1568.16
zmp_ph209_D12	AB/AB	1684.34
zmp_ph209_D3	AB/AB	1392.75
zmp_ph209_D6	AB/AB	1561.4
zmp_ph209_D8	AB/AB	1560.58
zmp_ph209_E1	AB/AB	1507.27
zmp_ph209_E4	AB/AB	1479.1
zmp_ph209_E9	AB/AB	1405.04
zmp_ph209_F10	AB/AB	1520.42
zmp_ph209_F4	AB/AB	1554.67
zmp_ph209_F8	AB/AB	1558.35
zmp_ph209_G5	AB/AB	1357.97
zmp_ph209_G7	AB/AB	1565.09
zmp_ph209_H10	AB/AB	1665.54
zmp_ph209_H12	AB/AB	1587.68
zmp_ph209_H9	AB/AB	1549.16
zmp_ph209_A11	AB/Tu	1324.1
zmp_ph209_A2	AB/Tu	1518.23
zmp_ph209_A3	AB/Tu	1281.95
zmp_ph209_A4	AB/Tu	1429.91
zmp_ph209_A5	AB/Tu	1493.94
zmp_ph209_A6	AB/Tu	1394.81
zmp_ph209_A9	AB/Tu	1319.56
zmp_ph209_B12	AB/Tu	1472.11
zmp_ph209_B4	AB/Tu	1342.44
zmp_ph209_B5	AB/Tu	1500.67
zmp_ph209_B7	AB/Tu	1404.96
zmp_ph209_B8	AB/Tu	1357.98
zmp_ph209_B9	AB/Tu	1470.57
zmp_ph209_C10	AB/Tu	1411.94
zmp_ph209_C11	AB/Tu	1444.71
zmp_ph209_C12	AB/Tu	1346.55
zmp_ph209_C2	AB/Tu	1480.48
zmp_ph209_C3	AB/Tu	1361.12
zmp_ph209_C5	AB/Tu	1470.79
zmp_ph209_C6	AB/Tu	1288.14
zmp_ph209_C8	AB/Tu	1509.9
zmp_ph209_D1	AB/Tu	1436.05
zmp_ph209_D10	AB/Tu	1419.51
zmp_ph209_D11	AB/Tu	1471.46
zmp_ph209_D2	AB/Tu	1375.75
zmp_ph209_D4	AB/Tu	1307.9
zmp_ph209_D5	AB/Tu	1296
zmp_ph209_D9	AB/Tu	1338.84
zmp_ph209_E10	AB/Tu	1488.84
zmp_ph209_E11	AB/Tu	1465.53
zmp_ph209_E12	AB/Tu	1376.26
zmp_ph209_E2	AB/Tu	1421.67
zmp_ph209_E3	AB/Tu	1489.15
zmp_ph209_E5	AB/Tu	1413.57
zmp_ph209_E6	AB/Tu	1411.58
zmp_ph209_F1	AB/Tu	1421.76
zmp_ph209_F11	AB/Tu	1368.81
zmp_ph209_F2	AB/Tu	1282.78
zmp_ph209_F5	AB/Tu	1376.38
zmp_ph209_F6	AB/Tu	1327.65
zmp_ph209_F7	AB/Tu	1269.22
zmp_ph209_G11	AB/Tu	1475.67
zmp_ph209_G12	AB/Tu	1403.92
zmp_ph209_G3	AB/Tu	1379.78
zmp_ph209_G4	AB/Tu	1539.13
zmp_ph209_G6	AB/Tu	1413.03
zmp_ph209_G8	AB/Tu	1266.59
zmp_ph209_G9	AB/Tu	1408.37
zmp_ph209_H1	AB/Tu	1247.08
zmp_ph209_H11	AB/Tu	1339.36
zmp_ph209_H2	AB/Tu	1458.15
zmp_ph209_H3	AB/Tu	1326.63
zmp_ph209_H4	AB/Tu	1394.63
zmp_ph209_H6	AB/Tu	1359.62
zmp_ph209_H8	AB/Tu	1319.2
zmp_ph209_B1	Tu/Tu	1286.24
zmp_ph209_B10	Tu/Tu	1360.98
zmp_ph209_B2	Tu/Tu	1330.01
zmp_ph209_C1	Tu/Tu	1355.92
zmp_ph209_C9	Tu/Tu	1381.93
zmp_ph209_D7	Tu/Tu	1285.92
zmp_ph209_E7	Tu/Tu	1154.77
zmp_ph209_E8	Tu/Tu	1255.72
zmp_ph209_F12	Tu/Tu	1249.09
zmp_ph209_F3	Tu/Tu	1188.73
zmp_ph209_F9	Tu/Tu	1185.02
zmp_ph209_G1	Tu/Tu	1228.02
zmp_ph209_G10	Tu/Tu	1218
zmp_ph209_G2	Tu/Tu	1179.87
zmp_ph209_H5	Tu/Tu	1180.6
zmp_ph209_H7	Tu/Tu	1210.75
