# Supplementary material for: Allele-specific gene expression can underlie altered transcript abundance in zebrafish mutants
Source: eLife. 2022 Feb 17;11:e72825. doi: 10.7554/eLife.72825 (PMC8884726; doi:10.7554/eLife.72825)
Supplement: Figure 3—source data 4. — Log2 fold change data for differentially expressed genes in wild-type SAT cross. [file elife-72825-fig3-data4.xlsx]

## Sheet: log2fc-by_expt
Region	Comparison	Gene	Name	padj	log2fc
deseq2-5_31000001_37000000	AB_Tu_het_vs_Tu_hom	ENSDARG00000035438	myhc4	3.07039e-97	4.78979
deseq2-5_31000001_37000000	AB_Tu_het_vs_Tu_hom	ENSDARG00000095142	si:ch211-208h16.4	4.04868e-36	-0.746513
deseq2-5_31000001_37000000	AB_Tu_het_vs_Tu_hom	ENSDARG00000035398	enc1	1.58043e-28	0.266416
deseq2-5_31000001_37000000	AB_Tu_het_vs_Tu_hom	ENSDARG00000034368	hexb	1.41258e-22	0.289206
deseq2-5_31000001_37000000	AB_Tu_het_vs_Tu_hom	ENSDARG00000009939	micu2	1.11538e-18	-0.301598
deseq2-5_31000001_37000000	AB_Tu_het_vs_Tu_hom	ENSDARG00000035018	thy1	4.46681e-14	-0.76807
deseq2-5_31000001_37000000	AB_Tu_het_vs_Tu_hom	ENSDARG00000094937	CR450833.1	1.3341e-07	2.91721
deseq2-5_31000001_37000000	AB_Tu_het_vs_Tu_hom	ENSDARG00000035338	tppp2	1.09266e-06	-0.318236
deseq2-5_31000001_37000000	AB_Tu_het_vs_Tu_hom	ENSDARG00000078411	hspb15	9.76857e-06	-0.391548
deseq2-5_31000001_37000000	AB_Tu_het_vs_Tu_hom	ENSDARG00000108939	FQ378016.1	9.76857e-06	-0.931679
deseq2-5_31000001_37000000	AB_Tu_het_vs_Tu_hom	ENSDARG00000014003	stard8	3.14601e-05	-0.220309
deseq2-5_31000001_37000000	AB_Tu_het_vs_Tu_hom	ENSDARG00000008414	exoc3l2a	0.000101143	-0.307229
deseq2-5_31000001_37000000	AB_Tu_het_vs_Tu_hom	ENSDARG00000093303	ifitm1	0.000170803	-0.421505
deseq2-5_31000001_37000000	AB_Tu_het_vs_Tu_hom	ENSDARG00000102641	CR925761.3	0.000252673	0.639935
deseq2-5_31000001_37000000	AB_Tu_het_vs_Tu_hom	ENSDARG00000055229	ncs1a	0.000317924	-0.187554
deseq2-5_31000001_37000000	AB_Tu_het_vs_Tu_hom	ENSDARG00000067806	zgc:158432	0.000335484	-0.371618
deseq2-5_31000001_37000000	AB_Tu_het_vs_Tu_hom	ENSDARG00000067981	zgc:103697	0.00062083	0.164126
deseq2-5_31000001_37000000	AB_Tu_het_vs_Tu_hom	ENSDARG00000035434	zmat5	0.000692917	-0.203034
deseq2-5_31000001_37000000	AB_Tu_het_vs_Tu_hom	ENSDARG00000020364	fbp1b	0.00159964	0.225298
deseq2-5_31000001_37000000	AB_Tu_het_vs_Tu_hom	ENSDARG00000033953	entpd2a.2	0.00344155	-0.488013
deseq2-5_31000001_37000000	AB_Tu_het_vs_Tu_hom	ENSDARG00000035391	ptcd2	0.00419539	0.327216
deseq2-5_31000001_37000000	AB_Tu_het_vs_Tu_hom	ENSDARG00000035422	ccn1l1	0.0046072	0.414547
deseq2-5_31000001_37000000	AB_Tu_het_vs_Tu_hom	ENSDARG00000027750	dpp7	0.0100154	0.152702
deseq2-5_31000001_37000000	AB_Tu_het_vs_Tu_hom	ENSDARG00000077253	alkbh6	0.0173811	-0.283476
deseq2-5_31000001_37000000	AB_Tu_het_vs_Tu_hom	ENSDARG00000088492	cntrl	0.021463	-0.30052
deseq2-5_31000001_37000000	AB_Tu_het_vs_Tu_hom	ENSDARG00000116863	CU984579.1	0.022935	-0.343009
deseq2-5_31000001_37000000	AB_Tu_het_vs_Tu_hom	ENSDARG00000059606	ccdc84	0.022935	-0.223702
deseq2-5_31000001_37000000	AB_Tu_het_vs_Tu_hom	ENSDARG00000060415	arhgef28a	0.0249736	-0.150339
deseq2-5_31000001_37000000	AB_Tu_het_vs_Tu_hom	ENSDARG00000008912	slc8a2a	0.0263451	-0.271636
deseq2-5_31000001_37000000	AB_Tu_het_vs_Tu_hom	ENSDARG00000027501	usp20	0.032182	-0.101978
deseq2-5_31000001_37000000	AB_Tu_het_vs_Tu_hom	ENSDARG00000013730	slc4a4a	0.0330387	0.104698
deseq2-5_31000001_37000000	AB_Tu_het_vs_Tu_hom	ENSDARG00000059600	rabep1	0.0352164	0.149495
deseq2-18_44000001_46000000	AB_Tu_het_vs_AB_hom	ENSDARG00000054864	aplp2	8.70226e-16	0.208469
deseq2-18_44000001_46000000	AB_Tu_het_vs_AB_hom	ENSDARG00000034941	si:dkey-224e22.2	1.15282e-11	0.498438
deseq2-18_44000001_46000000	AB_Tu_het_vs_AB_hom	ENSDARG00000102234	si:ch211-71n6.4	4.60482e-05	0.443563
deseq2-18_44000001_46000000	AB_Tu_het_vs_AB_hom	ENSDARG00000054978	kifc3	0.0172827	0.108835
deseq2-18_44000001_46000000	AB_hom_vs_Tu_hom	ENSDARG00000054864	aplp2	9.67012e-47	-0.40229
deseq2-18_44000001_46000000	AB_hom_vs_Tu_hom	ENSDARG00000034941	si:dkey-224e22.2	1.14427e-28	-0.834514
deseq2-18_44000001_46000000	AB_hom_vs_Tu_hom	ENSDARG00000102234	si:ch211-71n6.4	1.38929e-15	-0.784727
deseq2-18_44000001_46000000	AB_hom_vs_Tu_hom	ENSDARG00000104251	prdm10	1.7843e-12	0.276913
deseq2-18_44000001_46000000	AB_hom_vs_Tu_hom	ENSDARG00000061168	dhx34	3.88489e-12	0.44636
deseq2-18_44000001_46000000	AB_hom_vs_Tu_hom	ENSDARG00000069038	si:ch211-242e8.1	9.84336e-08	-0.620839
deseq2-18_44000001_46000000	AB_hom_vs_Tu_hom	ENSDARG00000041623	mt2	1.65213e-06	-0.930063
deseq2-18_44000001_46000000	AB_hom_vs_Tu_hom	ENSDARG00000099253	CU861469.1	2.35189e-06	3.1745
deseq2-18_44000001_46000000	AB_hom_vs_Tu_hom	ENSDARG00000058857	zgc:112052	5.46662e-06	0.562502
deseq2-18_44000001_46000000	AB_hom_vs_Tu_hom	ENSDARG00000011693	ttc36	1.1342e-05	0.408835
deseq2-18_44000001_46000000	AB_hom_vs_Tu_hom	ENSDARG00000017058	large2	8.59108e-05	-0.157741
deseq2-18_44000001_46000000	AB_hom_vs_Tu_hom	ENSDARG00000005972	ric8b	0.00010277	0.289467
deseq2-18_44000001_46000000	AB_hom_vs_Tu_hom	ENSDARG00000062756	pllp	0.000117426	-0.655568
deseq2-18_44000001_46000000	AB_hom_vs_Tu_hom	ENSDARG00000078983	fam118b	0.000148494	0.346823
deseq2-18_44000001_46000000	AB_hom_vs_Tu_hom	ENSDARG00000094719	CR318588.3	0.000168733	-0.897892
deseq2-18_44000001_46000000	AB_hom_vs_Tu_hom	ENSDARG00000069037	akip1	0.000208921	0.667093
deseq2-18_44000001_46000000	AB_hom_vs_Tu_hom	ENSDARG00000068242	cngb1a	0.000364674	-0.249146
deseq2-18_44000001_46000000	AB_hom_vs_Tu_hom	ENSDARG00000113320	si:dkey-88n24.5	0.000371497	-1.7196
deseq2-18_44000001_46000000	AB_hom_vs_Tu_hom	ENSDARG00000020405	napab	0.000521327	0.207996
deseq2-18_44000001_46000000	AB_hom_vs_Tu_hom	ENSDARG00000063186	si:ch211-220f12.4	0.000554273	-0.816694
deseq2-18_44000001_46000000	AB_hom_vs_Tu_hom	ENSDARG00000054978	kifc3	0.000554273	-0.137987
deseq2-18_44000001_46000000	AB_hom_vs_Tu_hom	ENSDARG00000030753	prrg4	0.00112196	-0.255382
deseq2-18_44000001_46000000	AB_hom_vs_Tu_hom	ENSDARG00000034001	tango6	0.00114044	-0.411299
deseq2-18_44000001_46000000	AB_hom_vs_Tu_hom	ENSDARG00000062558	rspry1	0.00142518	-0.195809
deseq2-18_44000001_46000000	AB_hom_vs_Tu_hom	ENSDARG00000068814	spata2l	0.00142518	-0.944895
deseq2-18_44000001_46000000	AB_hom_vs_Tu_hom	ENSDARG00000062821	slc6a15	0.00244655	-0.4153
deseq2-18_44000001_46000000	AB_hom_vs_Tu_hom	ENSDARG00000030872	cetp	0.00559943	-0.682525
deseq2-18_44000001_46000000	AB_hom_vs_Tu_hom	ENSDARG00000073752	CACNA2D1	0.00566886	-0.577873
deseq2-18_44000001_46000000	AB_hom_vs_Tu_hom	ENSDARG00000025299	tspan9a	0.00566886	-0.446819
deseq2-18_44000001_46000000	AB_hom_vs_Tu_hom	ENSDARG00000041581	znf143b	0.00682881	0.203378
deseq2-18_44000001_46000000	AB_hom_vs_Tu_hom	ENSDARG00000095556	CR318588.4	0.0105682	0.625146
deseq2-18_44000001_46000000	AB_hom_vs_Tu_hom	ENSDARG00000061159	bicra	0.0109302	-0.122973
deseq2-18_44000001_46000000	AB_hom_vs_Tu_hom	ENSDARG00000093282	CR786582.1	0.0116978	2.10192
deseq2-18_44000001_46000000	AB_hom_vs_Tu_hom	ENSDARG00000068947	si:ch211-264e16.1	0.014471	-2.12916
deseq2-18_44000001_46000000	AB_hom_vs_Tu_hom	ENSDARG00000042188	ttc38	0.0156468	0.390545
deseq2-18_44000001_46000000	AB_hom_vs_Tu_hom	ENSDARG00000063332	shank3a	0.0213872	-0.287039
deseq2-18_44000001_46000000	AB_hom_vs_Tu_hom	ENSDARG00000062824	alx1	0.0483789	0.31204
deseq2-18_44000001_46000000	AB_hom_vs_Tu_hom	ENSDARG00000058345	si:dkey-5i3.5	0.0496247	0.433701
deseq2-18_44000001_46000000	AB_hom_vs_Tu_hom	ENSDARG00000061124	srpra	0.0497418	0.164902
deseq2-18_44000001_46000000	AB_hom_vs_Tu_hom	ENSDARG00000021466	ireb2	0.0497457	0.121194
deseq2-18_44000001_46000000	AB_Tu_het_vs_Tu_hom	ENSDARG00000054864	aplp2	5.11404e-13	-0.193821
deseq2-18_44000001_46000000	AB_Tu_het_vs_Tu_hom	ENSDARG00000104251	prdm10	7.82566e-06	0.183219
deseq2-18_44000001_46000000	AB_Tu_het_vs_Tu_hom	ENSDARG00000034941	si:dkey-224e22.2	1.62788e-05	-0.336076
deseq2-18_44000001_46000000	AB_Tu_het_vs_Tu_hom	ENSDARG00000061168	dhx34	0.000196823	0.272201
deseq2-18_44000001_46000000	AB_Tu_het_vs_Tu_hom	ENSDARG00000102234	si:ch211-71n6.4	0.00890692	-0.341164
deseq2-18_44000001_46000000	AB_Tu_het_vs_Tu_hom	ENSDARG00000099253	CU861469.1	0.0137215	2.33303
deseq2-14_8000001_9000000	AB_Tu_het_vs_AB_hom	ENSDARG00000071871	glod5	1.31784e-13	0.522219
deseq2-14_8000001_9000000	AB_Tu_het_vs_AB_hom	ENSDARG00000100366	si:dkey-102m7.3	4.21999e-12	-0.358624
deseq2-14_8000001_9000000	AB_Tu_het_vs_AB_hom	ENSDARG00000104572	si:dkey-35h6.1	7.11059e-07	-1.00095
deseq2-14_8000001_9000000	AB_Tu_het_vs_AB_hom	ENSDARG00000098293	si:dkey-27i16.2	4.836e-06	0.484195
deseq2-14_8000001_9000000	AB_Tu_het_vs_AB_hom	ENSDARG00000003035	hspa9	3.21251e-05	0.143799
deseq2-14_8000001_9000000	AB_Tu_het_vs_AB_hom	ENSDARG00000099315	nsdhl	0.00556352	0.373719
deseq2-14_8000001_9000000	AB_Tu_het_vs_AB_hom	ENSDARG00000104285	armh3	0.0449583	-0.0918739
deseq2-16_37000001_40000000	AB_Tu_het_vs_AB_hom	ENSDARG00000099419	CABZ01025780.1	1.05554e-46	6.62316
deseq2-16_37000001_40000000	AB_Tu_het_vs_AB_hom	ENSDARG00000073799	zgc:194210	3.91278e-39	2.33892
deseq2-16_37000001_40000000	AB_Tu_het_vs_AB_hom	ENSDARG00000086847	irgq1	1.81941e-29	3.36004
deseq2-16_37000001_40000000	AB_Tu_het_vs_AB_hom	ENSDARG00000108060	LO017771.1	9.98205e-28	1.15909
deseq2-16_37000001_40000000	AB_Tu_het_vs_AB_hom	ENSDARG00000109267	CABZ01024501.1	1.08071e-13	6.73647
deseq2-16_37000001_40000000	AB_Tu_het_vs_AB_hom	ENSDARG00000055901	steap4	2.74448e-13	0.58949
deseq2-16_37000001_40000000	AB_Tu_het_vs_AB_hom	ENSDARG00000101481	rbp5	5.13605e-13	0.364699
deseq2-16_37000001_40000000	AB_Tu_het_vs_AB_hom	ENSDARG00000040251	ctsk	5.12353e-11	0.544866
deseq2-16_37000001_40000000	AB_Tu_het_vs_AB_hom	ENSDARG00000088693	dcst2	1.78677e-09	2.27745
deseq2-16_37000001_40000000	AB_Tu_het_vs_AB_hom	ENSDARG00000070317	irge4	2.07113e-09	2.83836
deseq2-16_37000001_40000000	AB_Tu_het_vs_AB_hom	ENSDARG00000086495	BX546500.1	8.18215e-09	-1.12014
deseq2-16_37000001_40000000	AB_Tu_het_vs_AB_hom	ENSDARG00000053215	me1	2.43552e-08	-0.595923
deseq2-16_37000001_40000000	AB_Tu_het_vs_AB_hom	ENSDARG00000099412	bcan	3.98419e-08	-0.24318
deseq2-16_37000001_40000000	AB_Tu_het_vs_AB_hom	ENSDARG00000028715	mindy3	4.30303e-07	-0.181176
deseq2-16_37000001_40000000	AB_Tu_het_vs_AB_hom	ENSDARG00000076752	tmem67	7.70199e-07	-0.312951
deseq2-16_37000001_40000000	AB_Tu_het_vs_AB_hom	ENSDARG00000070132	aste1a	4.2427e-06	3.96803
deseq2-16_37000001_40000000	AB_Tu_het_vs_AB_hom	ENSDARG00000039943	tent5ba	4.2427e-06	-0.162102
deseq2-16_37000001_40000000	AB_Tu_het_vs_AB_hom	ENSDARG00000097819	znf576.1	4.4597e-06	-0.217944
deseq2-16_37000001_40000000	AB_Tu_het_vs_AB_hom	ENSDARG00000097110	si:dkey-56f14.4	7.72585e-06	-0.709375
deseq2-16_37000001_40000000	AB_Tu_het_vs_AB_hom	ENSDARG00000095553	lenep	3.45815e-05	1.61325
deseq2-16_37000001_40000000	AB_Tu_het_vs_AB_hom	ENSDARG00000020890	tmod4	5.25139e-05	0.188356
deseq2-16_37000001_40000000	AB_Tu_het_vs_AB_hom	ENSDARG00000093087	BX649388.3	6.73767e-05	3.17715
deseq2-16_37000001_40000000	AB_Tu_het_vs_AB_hom	ENSDARG00000079788	fam171a1	0.000128721	0.193755
deseq2-16_37000001_40000000	AB_Tu_het_vs_AB_hom	ENSDARG00000097001	FP245462.1	0.000428937	2.8861
deseq2-16_37000001_40000000	AB_Tu_het_vs_AB_hom	ENSDARG00000085572	RF00001	0.000640309	-1.35451
deseq2-16_37000001_40000000	AB_Tu_het_vs_AB_hom	ENSDARG00000054914	dgat1b	0.000647711	0.294989
deseq2-16_37000001_40000000	AB_Tu_het_vs_AB_hom	ENSDARG00000094881	si:ch211-197h24.8	0.000762493	0.990332
deseq2-16_37000001_40000000	AB_Tu_het_vs_AB_hom	ENSDARG00000088452	si:dkey-24i24.3	0.000762493	2.3109
deseq2-16_37000001_40000000	AB_Tu_het_vs_AB_hom	ENSDARG00000040291	cadm4	0.00100504	-0.12463
deseq2-16_37000001_40000000	AB_Tu_het_vs_AB_hom	ENSDARG00000117648	AL954832.1	0.00135363	2.42863
deseq2-16_37000001_40000000	AB_Tu_het_vs_AB_hom	ENSDARG00000086126	trim33l	0.00158033	0.341604
deseq2-16_37000001_40000000	AB_Tu_het_vs_AB_hom	ENSDARG00000013771	ctss2.2	0.00159781	0.478383
deseq2-16_37000001_40000000	AB_Tu_het_vs_AB_hom	ENSDARG00000060112	sybu	0.00172174	0.228299
deseq2-16_37000001_40000000	AB_Tu_het_vs_AB_hom	ENSDARG00000057844	zgc:171470	0.00179842	-0.381918
deseq2-16_37000001_40000000	AB_Tu_het_vs_AB_hom	ENSDARG00000025789	chd4b	0.00188917	0.0883888
deseq2-16_37000001_40000000	AB_Tu_het_vs_AB_hom	ENSDARG00000093232	CR847566.1	0.00192766	-0.662904
deseq2-16_37000001_40000000	AB_Tu_het_vs_AB_hom	ENSDARG00000089033	rrnad1	0.00589777	-0.277752
deseq2-16_37000001_40000000	AB_Tu_het_vs_AB_hom	ENSDARG00000070455	tmem245	0.0112046	-0.189568
deseq2-16_37000001_40000000	AB_Tu_het_vs_AB_hom	ENSDARG00000089123	negaly6	0.0139969	0.357081
deseq2-16_37000001_40000000	AB_Tu_het_vs_AB_hom	ENSDARG00000070399	alg2	0.0149622	0.270268
deseq2-16_37000001_40000000	AB_Tu_het_vs_AB_hom	ENSDARG00000086626	im:7147486	0.0169148	0.118799
deseq2-16_37000001_40000000	AB_Tu_het_vs_AB_hom	ENSDARG00000040027	osbpl10b	0.0207404	0.15501
deseq2-16_37000001_40000000	AB_Tu_het_vs_AB_hom	ENSDARG00000044365	angptl3	0.0215138	-0.232905
deseq2-16_37000001_40000000	AB_Tu_het_vs_AB_hom	ENSDARG00000073786	cmbl	0.0215138	-0.337019
deseq2-16_37000001_40000000	AB_Tu_het_vs_AB_hom	ENSDARG00000037154	hivep3b	0.0255396	0.12569
deseq2-16_37000001_40000000	AB_Tu_het_vs_AB_hom	ENSDARG00000016856	pon2	0.0280241	-0.240961
deseq2-16_37000001_40000000	AB_Tu_het_vs_AB_hom	ENSDARG00000117633	CABZ01024499.1	0.0293912	2.37328
deseq2-16_37000001_40000000	AB_Tu_het_vs_AB_hom	ENSDARG00000076627	smg9	0.0293912	-0.171567
deseq2-16_37000001_40000000	AB_Tu_het_vs_AB_hom	ENSDARG00000074807	tbrg4	0.0348862	0.184314
deseq2-16_37000001_40000000	AB_Tu_het_vs_AB_hom	ENSDARG00000111701	lbh	0.0361078	-0.221822
deseq2-16_37000001_40000000	AB_Tu_het_vs_AB_hom	ENSDARG00000008363	mcl1b	0.0384151	-0.241572
deseq2-16_37000001_40000000	AB_Tu_het_vs_AB_hom	ENSDARG00000101145	lipeb	0.0399471	0.288979
deseq2-16_37000001_40000000	AB_Tu_het_vs_AB_hom	ENSDARG00000069807	zdhhc18a	0.0454105	-0.125345
deseq2-16_37000001_40000000	AB_Tu_het_vs_AB_hom	ENSDARG00000032496	pon1	0.0455119	-0.252443
deseq2-16_37000001_40000000	AB_Tu_het_vs_AB_hom	ENSDARG00000103940	frrs1l	0.0485872	0.251778
deseq2-16_37000001_40000000	AB_Tu_het_vs_AB_hom	ENSDARG00000071012	ifit14	0.0485872	-1.58774
deseq2-16_37000001_40000000	AB_Tu_het_vs_AB_hom	ENSDARG00000101313	MCHR2 (1 of many)	0.04913	2.00634
deseq2-16_37000001_40000000	AB_Tu_het_vs_AB_hom	ENSDARG00000010420	ndrg1b	0.0497919	0.330042
deseq2-16_37000001_40000000	AB_hom_vs_Tu_hom	ENSDARG00000073799	zgc:194210	9.40596e-69	-3.26056
deseq2-16_37000001_40000000	AB_hom_vs_Tu_hom	ENSDARG00000099419	CABZ01025780.1	1.49693e-60	-7.56745
deseq2-16_37000001_40000000	AB_hom_vs_Tu_hom	ENSDARG00000108060	LO017771.1	1.2072e-52	-1.75503
deseq2-16_37000001_40000000	AB_hom_vs_Tu_hom	ENSDARG00000086847	irgq1	5.33442e-41	-4.07245
deseq2-16_37000001_40000000	AB_hom_vs_Tu_hom	ENSDARG00000053215	me1	5.33442e-41	1.51936
deseq2-16_37000001_40000000	AB_hom_vs_Tu_hom	ENSDARG00000097110	si:dkey-56f14.4	9.0991e-40	1.99329
deseq2-16_37000001_40000000	AB_hom_vs_Tu_hom	ENSDARG00000055901	steap4	1.29476e-33	-1.03456
deseq2-16_37000001_40000000	AB_hom_vs_Tu_hom	ENSDARG00000099412	bcan	2.17303e-27	0.497237
deseq2-16_37000001_40000000	AB_hom_vs_Tu_hom	ENSDARG00000101481	rbp5	2.76142e-26	-0.580449
deseq2-16_37000001_40000000	AB_hom_vs_Tu_hom	ENSDARG00000040251	ctsk	7.00044e-26	-0.923438
deseq2-16_37000001_40000000	AB_hom_vs_Tu_hom	ENSDARG00000097819	znf576.1	1.36932e-25	0.486996
deseq2-16_37000001_40000000	AB_hom_vs_Tu_hom	ENSDARG00000086495	BX546500.1	4.83539e-25	4.13881
deseq2-16_37000001_40000000	AB_hom_vs_Tu_hom	ENSDARG00000076752	tmem67	1.02487e-22	0.641241
deseq2-16_37000001_40000000	AB_hom_vs_Tu_hom	ENSDARG00000088693	dcst2	1.91318e-18	-3.13137
deseq2-16_37000001_40000000	AB_hom_vs_Tu_hom	ENSDARG00000020890	tmod4	2.10888e-17	-0.374357
deseq2-16_37000001_40000000	AB_hom_vs_Tu_hom	ENSDARG00000070317	irge4	9.3325e-17	-3.73362
deseq2-16_37000001_40000000	AB_hom_vs_Tu_hom	ENSDARG00000028715	mindy3	3.52402e-16	0.307073
deseq2-16_37000001_40000000	AB_hom_vs_Tu_hom	ENSDARG00000109267	CABZ01024501.1	3.18732e-15	-7.80865
deseq2-16_37000001_40000000	AB_hom_vs_Tu_hom	ENSDARG00000032496	pon1	2.73393e-14	0.664613
deseq2-16_37000001_40000000	AB_hom_vs_Tu_hom	ENSDARG00000039943	tent5ba	6.50294e-14	0.271871
deseq2-16_37000001_40000000	AB_hom_vs_Tu_hom	ENSDARG00000060112	sybu	7.35293e-13	-0.455257
deseq2-16_37000001_40000000	AB_hom_vs_Tu_hom	ENSDARG00000095553	lenep	7.88548e-13	-2.62082
deseq2-16_37000001_40000000	AB_hom_vs_Tu_hom	ENSDARG00000016856	pon2	2.4984e-12	0.563954
deseq2-16_37000001_40000000	AB_hom_vs_Tu_hom	ENSDARG00000092134	rad54b	1.83094e-11	0.759978
deseq2-16_37000001_40000000	AB_hom_vs_Tu_hom	ENSDARG00000085572	RF00001	2.56513e-11	3.71134
deseq2-16_37000001_40000000	AB_hom_vs_Tu_hom	ENSDARG00000025789	chd4b	1.61094e-10	-0.16223
deseq2-16_37000001_40000000	AB_hom_vs_Tu_hom	ENSDARG00000040291	cadm4	5.87419e-10	0.217401
deseq2-16_37000001_40000000	AB_hom_vs_Tu_hom	ENSDARG00000070399	alg2	1.03431e-09	-0.518396
deseq2-16_37000001_40000000	AB_hom_vs_Tu_hom	ENSDARG00000070132	aste1a	1.35096e-09	-5.19381
deseq2-16_37000001_40000000	AB_hom_vs_Tu_hom	ENSDARG00000093232	CR847566.1	1.94266e-09	1.26343
deseq2-16_37000001_40000000	AB_hom_vs_Tu_hom	ENSDARG00000070455	tmem245	2.83159e-09	0.36741
deseq2-16_37000001_40000000	AB_hom_vs_Tu_hom	ENSDARG00000093087	BX649388.3	5.38898e-09	-4.3187
deseq2-16_37000001_40000000	AB_hom_vs_Tu_hom	ENSDARG00000101145	lipeb	6.48888e-09	-0.573595
deseq2-16_37000001_40000000	AB_hom_vs_Tu_hom	ENSDARG00000086626	im:7147486	1.14167e-08	-0.222295
deseq2-16_37000001_40000000	AB_hom_vs_Tu_hom	ENSDARG00000076627	smg9	1.17523e-08	0.344579
deseq2-16_37000001_40000000	AB_hom_vs_Tu_hom	ENSDARG00000054914	dgat1b	4.74283e-08	-0.448777
deseq2-16_37000001_40000000	AB_hom_vs_Tu_hom	ENSDARG00000010420	ndrg1b	5.00835e-08	-0.649803
deseq2-16_37000001_40000000	AB_hom_vs_Tu_hom	ENSDARG00000013771	ctss2.2	9.07988e-08	-0.752338
deseq2-16_37000001_40000000	AB_hom_vs_Tu_hom	ENSDARG00000089033	rrnad1	9.61176e-08	0.488736
deseq2-16_37000001_40000000	AB_hom_vs_Tu_hom	ENSDARG00000040027	osbpl10b	1.04532e-07	-0.277965
deseq2-16_37000001_40000000	AB_hom_vs_Tu_hom	ENSDARG00000088452	si:dkey-24i24.3	1.20765e-07	-3.08199
deseq2-16_37000001_40000000	AB_hom_vs_Tu_hom	ENSDARG00000090190	bcam	3.29674e-07	0.314551
deseq2-16_37000001_40000000	AB_hom_vs_Tu_hom	ENSDARG00000097761	BX005234.1	4.67811e-07	-1.30834
deseq2-16_37000001_40000000	AB_hom_vs_Tu_hom	ENSDARG00000111795	CR855311.5	4.84895e-07	1.49824
deseq2-16_37000001_40000000	AB_hom_vs_Tu_hom	ENSDARG00000094881	si:ch211-197h24.8	5.35474e-07	-1.3502
deseq2-16_37000001_40000000	AB_hom_vs_Tu_hom	ENSDARG00000086126	trim33l	7.5536e-07	-0.499271
deseq2-16_37000001_40000000	AB_hom_vs_Tu_hom	ENSDARG00000098809	snap91a	8.36316e-07	-0.166012
deseq2-16_37000001_40000000	AB_hom_vs_Tu_hom	ENSDARG00000061335	galnt1	1.15981e-06	-0.206698
deseq2-16_37000001_40000000	AB_hom_vs_Tu_hom	ENSDARG00000079788	fam171a1	1.34548e-06	-0.253956
deseq2-16_37000001_40000000	AB_hom_vs_Tu_hom	ENSDARG00000040282	zgc:92590	1.89948e-06	2.56384
deseq2-16_37000001_40000000	AB_hom_vs_Tu_hom	ENSDARG00000075824	virma	2.13455e-06	-0.197442
deseq2-16_37000001_40000000	AB_hom_vs_Tu_hom	ENSDARG00000102717	tmem42a	3.14434e-06	-0.505206
deseq2-16_37000001_40000000	AB_hom_vs_Tu_hom	ENSDARG00000000189	sema6e	8.41931e-06	-0.169214
deseq2-16_37000001_40000000	AB_hom_vs_Tu_hom	ENSDARG00000117228	CT025588.2	9.09027e-06	2.93536
deseq2-16_37000001_40000000	AB_hom_vs_Tu_hom	ENSDARG00000008363	mcl1b	9.30694e-06	0.402844
deseq2-16_37000001_40000000	AB_hom_vs_Tu_hom	ENSDARG00000092272	BX511161.1	9.30694e-06	-0.839883
deseq2-16_37000001_40000000	AB_hom_vs_Tu_hom	ENSDARG00000024717	selenbp1	9.66296e-06	-0.306466
deseq2-16_37000001_40000000	AB_hom_vs_Tu_hom	ENSDARG00000097396	BX539313.1	1.03944e-05	-1.45466
deseq2-16_37000001_40000000	AB_hom_vs_Tu_hom	ENSDARG00000101313	MCHR2 (1 of many)	1.44464e-05	-2.98374
deseq2-16_37000001_40000000	AB_hom_vs_Tu_hom	ENSDARG00000037154	hivep3b	1.49932e-05	-0.19836
deseq2-16_37000001_40000000	AB_hom_vs_Tu_hom	ENSDARG00000094400	si:dkey-199f5.6	2.33596e-05	-2.63931
deseq2-16_37000001_40000000	AB_hom_vs_Tu_hom	ENSDARG00000097001	FP245462.1	2.34676e-05	-3.36236
deseq2-16_37000001_40000000	AB_hom_vs_Tu_hom	ENSDARG00000082825	dre-let-7d-1	2.67376e-05	-2.93029
deseq2-16_37000001_40000000	AB_hom_vs_Tu_hom	ENSDARG00000055889	zgc:153215	2.85636e-05	-0.434272
deseq2-16_37000001_40000000	AB_hom_vs_Tu_hom	ENSDARG00000097757	BX511010.1	2.93287e-05	-2.87765
deseq2-16_37000001_40000000	AB_hom_vs_Tu_hom	ENSDARG00000074947	calhm5.1	5.81693e-05	-0.733522
deseq2-16_37000001_40000000	AB_hom_vs_Tu_hom	ENSDARG00000117633	CABZ01024499.1	6.73454e-05	-3.30826
deseq2-16_37000001_40000000	AB_hom_vs_Tu_hom	ENSDARG00000006598	sgk2b	7.93077e-05	0.480854
deseq2-16_37000001_40000000	AB_hom_vs_Tu_hom	ENSDARG00000086950	si:ch211-269k10.2	0.000185012	-0.438775
deseq2-16_37000001_40000000	AB_hom_vs_Tu_hom	ENSDARG00000040159	wnt4b	0.000185012	-0.336106
deseq2-16_37000001_40000000	AB_hom_vs_Tu_hom	ENSDARG00000007842	MCHR2 (1 of many)	0.000276495	0.649318
deseq2-16_37000001_40000000	AB_hom_vs_Tu_hom	ENSDARG00000070170	si:ch211-225p5.8	0.000348446	0.429802
deseq2-16_37000001_40000000	AB_hom_vs_Tu_hom	ENSDARG00000092136	cenpw	0.000380436	0.616512
deseq2-16_37000001_40000000	AB_hom_vs_Tu_hom	ENSDARG00000060222	scn1ba	0.000380782	-0.245262
deseq2-16_37000001_40000000	AB_hom_vs_Tu_hom	ENSDARG00000075149	nagpa	0.000380782	0.413059
deseq2-16_37000001_40000000	AB_hom_vs_Tu_hom	ENSDARG00000102094	wu:fd46c06	0.000447735	-2.77761
deseq2-16_37000001_40000000	AB_hom_vs_Tu_hom	ENSDARG00000074807	tbrg4	0.00047044	-0.26077
deseq2-16_37000001_40000000	AB_hom_vs_Tu_hom	ENSDARG00000054789	lysmd1	0.000473478	0.309169
deseq2-16_37000001_40000000	AB_hom_vs_Tu_hom	ENSDARG00000069929	CABZ01053976.1	0.000837323	-0.478254
deseq2-16_37000001_40000000	AB_hom_vs_Tu_hom	ENSDARG00000077641	thbs3a	0.00154386	0.361087
deseq2-16_37000001_40000000	AB_hom_vs_Tu_hom	ENSDARG00000069807	zdhhc18a	0.00154386	0.175407
deseq2-16_37000001_40000000	AB_hom_vs_Tu_hom	ENSDARG00000117648	AL954832.1	0.00154386	-2.54227
deseq2-16_37000001_40000000	AB_hom_vs_Tu_hom	ENSDARG00000069833	rhbdl2	0.00164684	-0.396249
deseq2-16_37000001_40000000	AB_hom_vs_Tu_hom	ENSDARG00000053479	gdf6a	0.00184676	-0.313152
deseq2-16_37000001_40000000	AB_hom_vs_Tu_hom	ENSDARG00000074763	mrap2a	0.00186421	-0.367447
deseq2-16_37000001_40000000	AB_hom_vs_Tu_hom	ENSDARG00000098129	si:dkeyp-97a10.2	0.00201055	-0.495067
deseq2-16_37000001_40000000	AB_hom_vs_Tu_hom	ENSDARG00000101543	washc5	0.00211179	0.180667
deseq2-16_37000001_40000000	AB_hom_vs_Tu_hom	ENSDARG00000054814	ptp4a3b	0.00222753	-0.271095
deseq2-16_37000001_40000000	AB_hom_vs_Tu_hom	ENSDARG00000021021	trim35-28	0.00297422	-0.215697
deseq2-16_37000001_40000000	AB_hom_vs_Tu_hom	ENSDARG00000104344	ccdc127a	0.00348283	0.390844
deseq2-16_37000001_40000000	AB_hom_vs_Tu_hom	ENSDARG00000054941	ldlrad4b	0.0035683	0.468676
deseq2-16_37000001_40000000	AB_hom_vs_Tu_hom	ENSDARG00000103940	frrs1l	0.00369412	-0.328377
deseq2-16_37000001_40000000	AB_hom_vs_Tu_hom	ENSDARG00000055400	si:dkey-56f14.7	0.00425401	0.224217
deseq2-16_37000001_40000000	AB_hom_vs_Tu_hom	ENSDARG00000002213	invs	0.00462912	-0.343867
deseq2-16_37000001_40000000	AB_hom_vs_Tu_hom	ENSDARG00000019962	dop1a	0.00478862	-0.163461
deseq2-16_37000001_40000000	AB_hom_vs_Tu_hom	ENSDARG00000076262	pou3f2b	0.00540603	-0.225632
deseq2-16_37000001_40000000	AB_hom_vs_Tu_hom	ENSDARG00000079751	megf8	0.00540603	0.157688
deseq2-16_37000001_40000000	AB_hom_vs_Tu_hom	ENSDARG00000069995	dpy19l1l	0.00577851	0.352813
deseq2-16_37000001_40000000	AB_hom_vs_Tu_hom	ENSDARG00000104760	si:ch211-1i11.3	0.00590937	0.27357
deseq2-16_37000001_40000000	AB_hom_vs_Tu_hom	ENSDARG00000003027	scnm1	0.00598022	-0.32306
deseq2-16_37000001_40000000	AB_hom_vs_Tu_hom	ENSDARG00000117273	FO905052.1	0.00700862	-0.416287
deseq2-16_37000001_40000000	AB_hom_vs_Tu_hom	ENSDARG00000017427	phf20l1	0.00727298	-0.137529
deseq2-16_37000001_40000000	AB_hom_vs_Tu_hom	ENSDARG00000015930	rwdd1	0.00783083	-0.202536
deseq2-16_37000001_40000000	AB_hom_vs_Tu_hom	ENSDARG00000040076	pycard	0.00801632	-0.309037
deseq2-16_37000001_40000000	AB_hom_vs_Tu_hom	ENSDARG00000097126	CR854927.3	0.0085847	-2.63699
deseq2-16_37000001_40000000	AB_hom_vs_Tu_hom	ENSDARG00000040249	tlr18	0.00999448	-0.357684
deseq2-16_37000001_40000000	AB_hom_vs_Tu_hom	ENSDARG00000104641	si:ch211-261d7.6	0.0104752	0.219586
deseq2-16_37000001_40000000	AB_hom_vs_Tu_hom	ENSDARG00000040130	si:ch211-215k15.4	0.0105416	0.74155
deseq2-16_37000001_40000000	AB_hom_vs_Tu_hom	ENSDARG00000044365	angptl3	0.0119782	0.269664
deseq2-16_37000001_40000000	AB_hom_vs_Tu_hom	ENSDARG00000094929	apoa4b.2	0.0131151	-0.703559
deseq2-16_37000001_40000000	AB_hom_vs_Tu_hom	ENSDARG00000089441	si:ch211-105c13.3	0.0131399	-0.376536
deseq2-16_37000001_40000000	AB_hom_vs_Tu_hom	ENSDARG00000111123	BX537263.1	0.0131399	10.8151
deseq2-16_37000001_40000000	AB_hom_vs_Tu_hom	ENSDARG00000103181	si:dkey-34d22.1	0.0163863	-0.183507
deseq2-16_37000001_40000000	AB_hom_vs_Tu_hom	ENSDARG00000078527	lingo4b	0.0167325	-0.309561
deseq2-16_37000001_40000000	AB_hom_vs_Tu_hom	ENSDARG00000060445	elp6	0.0174113	0.286002
deseq2-16_37000001_40000000	AB_hom_vs_Tu_hom	ENSDARG00000046148	tnfaip8l2b	0.0191747	0.26552
deseq2-16_37000001_40000000	AB_hom_vs_Tu_hom	ENSDARG00000092052	gstk4	0.0207981	0.765031
deseq2-16_37000001_40000000	AB_hom_vs_Tu_hom	ENSDARG00000040081	zp3d.1	0.0210144	-0.987637
deseq2-16_37000001_40000000	AB_hom_vs_Tu_hom	ENSDARG00000009978	icn	0.0210144	0.342522
deseq2-16_37000001_40000000	AB_hom_vs_Tu_hom	ENSDARG00000099448	sh3d21	0.0215791	-0.319988
deseq2-16_37000001_40000000	AB_hom_vs_Tu_hom	ENSDARG00000033436	mboat7	0.021897	-0.236462
deseq2-16_37000001_40000000	AB_hom_vs_Tu_hom	ENSDARG00000009133	myo1eb	0.021897	0.233111
deseq2-16_37000001_40000000	AB_hom_vs_Tu_hom	ENSDARG00000034577	si:dkey-23o4.6	0.0222232	-0.332987
deseq2-16_37000001_40000000	AB_hom_vs_Tu_hom	ENSDARG00000068947	si:ch211-264e16.1	0.0222232	1.9654
deseq2-16_37000001_40000000	AB_hom_vs_Tu_hom	ENSDARG00000098228	thrap3b	0.0248102	-0.0968888
deseq2-16_37000001_40000000	AB_hom_vs_Tu_hom	ENSDARG00000076568	sec61b	0.0264562	-0.190581
deseq2-16_37000001_40000000	AB_hom_vs_Tu_hom	ENSDARG00000089123	negaly6	0.0266512	-0.375474
deseq2-16_37000001_40000000	AB_hom_vs_Tu_hom	ENSDARG00000100691	prss35	0.0297074	0.20603
deseq2-16_37000001_40000000	AB_hom_vs_Tu_hom	ENSDARG00000092759	si:dkey-61p9.9	0.0313339	0.450605
deseq2-16_37000001_40000000	AB_hom_vs_Tu_hom	ENSDARG00000088342	tmem145	0.0392219	-0.244287
deseq2-16_37000001_40000000	AB_hom_vs_Tu_hom	ENSDARG00000098295	efna3b	0.0403862	-0.254796
deseq2-16_37000001_40000000	AB_hom_vs_Tu_hom	ENSDARG00000093279	si:dkey-11o1.3	0.0431116	-0.83947
deseq2-16_37000001_40000000	AB_hom_vs_Tu_hom	ENSDARG00000077987	zfat	0.0431116	0.204165
deseq2-16_37000001_40000000	AB_hom_vs_Tu_hom	ENSDARG00000060948	dync1i1	0.0440446	-0.13911
deseq2-16_37000001_40000000	AB_hom_vs_Tu_hom	ENSDARG00000058508	cfap70	0.0450177	-0.253348
deseq2-16_37000001_40000000	AB_hom_vs_Tu_hom	ENSDARG00000055339	si:ch73-1a9.4	0.0493715	0.157247
deseq2-16_37000001_40000000	AB_Tu_het_vs_Tu_hom	ENSDARG00000097110	si:dkey-56f14.4	1.05934e-20	1.28391
deseq2-16_37000001_40000000	AB_Tu_het_vs_Tu_hom	ENSDARG00000053215	me1	4.0197e-18	0.923436
deseq2-16_37000001_40000000	AB_Tu_het_vs_Tu_hom	ENSDARG00000073799	zgc:194210	1.29808e-12	-0.921638
deseq2-16_37000001_40000000	AB_Tu_het_vs_Tu_hom	ENSDARG00000086495	BX546500.1	1.29808e-12	3.01867
deseq2-16_37000001_40000000	AB_Tu_het_vs_Tu_hom	ENSDARG00000099419	CABZ01025780.1	2.13001e-11	-0.944296
deseq2-16_37000001_40000000	AB_Tu_het_vs_Tu_hom	ENSDARG00000097819	znf576.1	3.15611e-09	0.269052
deseq2-16_37000001_40000000	AB_Tu_het_vs_Tu_hom	ENSDARG00000108060	LO017771.1	1.16136e-08	-0.595937
deseq2-16_37000001_40000000	AB_Tu_het_vs_Tu_hom	ENSDARG00000099412	bcan	2.24299e-08	0.254057
deseq2-16_37000001_40000000	AB_Tu_het_vs_Tu_hom	ENSDARG00000055901	steap4	1.2195e-07	-0.445075
deseq2-16_37000001_40000000	AB_Tu_het_vs_Tu_hom	ENSDARG00000076752	tmem67	1.61477e-06	0.32829
deseq2-16_37000001_40000000	AB_Tu_het_vs_Tu_hom	ENSDARG00000032496	pon1	3.17137e-06	0.41217
deseq2-16_37000001_40000000	AB_Tu_het_vs_Tu_hom	ENSDARG00000040251	ctsk	8.39241e-05	-0.378572
deseq2-16_37000001_40000000	AB_Tu_het_vs_Tu_hom	ENSDARG00000020890	tmod4	0.000104317	-0.186001
deseq2-16_37000001_40000000	AB_Tu_het_vs_Tu_hom	ENSDARG00000092134	rad54b	0.00021193	0.46313
deseq2-16_37000001_40000000	AB_Tu_het_vs_Tu_hom	ENSDARG00000016856	pon2	0.000254864	0.322993
deseq2-16_37000001_40000000	AB_Tu_het_vs_Tu_hom	ENSDARG00000101481	rbp5	0.000872102	-0.215749
deseq2-16_37000001_40000000	AB_Tu_het_vs_Tu_hom	ENSDARG00000088693	dcst2	0.000883037	-0.853926
deseq2-16_37000001_40000000	AB_Tu_het_vs_Tu_hom	ENSDARG00000086847	irgq1	0.000941999	-0.712404
deseq2-16_37000001_40000000	AB_Tu_het_vs_Tu_hom	ENSDARG00000040282	zgc:92590	0.00101358	1.85556
deseq2-16_37000001_40000000	AB_Tu_het_vs_Tu_hom	ENSDARG00000085572	RF00001	0.00116352	2.35682
deseq2-16_37000001_40000000	AB_Tu_het_vs_Tu_hom	ENSDARG00000060112	sybu	0.00238531	-0.226959
deseq2-16_37000001_40000000	AB_Tu_het_vs_Tu_hom	ENSDARG00000070317	irge4	0.00438276	-0.895266
deseq2-16_37000001_40000000	AB_Tu_het_vs_Tu_hom	ENSDARG00000090190	bcam	0.00531398	0.199251
deseq2-16_37000001_40000000	AB_Tu_het_vs_Tu_hom	ENSDARG00000041490	afp4	0.0104979	-2.14726
deseq2-16_37000001_40000000	AB_Tu_het_vs_Tu_hom	ENSDARG00000092272	BX511161.1	0.0108461	-0.517629
deseq2-16_37000001_40000000	AB_Tu_het_vs_Tu_hom	ENSDARG00000086950	si:ch211-269k10.2	0.0111003	-0.324277
deseq2-16_37000001_40000000	AB_Tu_het_vs_Tu_hom	ENSDARG00000004952	rsad2	0.0177969	-1.32678
deseq2-16_37000001_40000000	AB_Tu_het_vs_Tu_hom	ENSDARG00000028715	mindy3	0.0180618	0.125897
deseq2-16_37000001_40000000	AB_Tu_het_vs_Tu_hom	ENSDARG00000070399	alg2	0.027596	-0.248128
deseq2-16_37000001_40000000	AB_Tu_het_vs_Tu_hom	ENSDARG00000101145	lipeb	0.0331235	-0.284616
deseq2-16_37000001_40000000	AB_Tu_het_vs_Tu_hom	ENSDARG00000098809	snap91a	0.0349914	-0.0953041
deseq2-16_37000001_40000000	AB_Tu_het_vs_Tu_hom	ENSDARG00000103013	pcdh1g22	0.0447773	0.204976
deseq2-16_37000001_40000000	AB_Tu_het_vs_Tu_hom	ENSDARG00000095553	lenep	0.0452835	-1.00757
deseq2-16_37000001_40000000	AB_Tu_het_vs_Tu_hom	ENSDARG00000092500	si:dkey-222h21.1	0.049684	-1.20803
deseq2-16_37000001_40000000	AB_Tu_het_vs_Tu_hom	ENSDARG00000111795	CR855311.5	0.049684	0.906656
deseq2-5_44000001_53000000	AB_Tu_het_vs_AB_hom	ENSDARG00000098373	BX276102.1	1.78555e-16	4.07222
deseq2-5_44000001_53000000	AB_Tu_het_vs_AB_hom	ENSDARG00000067664	si:dkey-172m14.2	2.79592e-16	1.0203
deseq2-5_44000001_53000000	AB_Tu_het_vs_AB_hom	ENSDARG00000013730	slc4a4a	4.85699e-09	-0.149611
deseq2-5_44000001_53000000	AB_Tu_het_vs_AB_hom	ENSDARG00000052734	hmgcra	4.90323e-07	0.663047
deseq2-5_44000001_53000000	AB_Tu_het_vs_AB_hom	ENSDARG00000052693	si:dkey-172m14.1	5.94455e-07	-0.342942
deseq2-5_44000001_53000000	AB_Tu_het_vs_AB_hom	ENSDARG00000035338	tppp2	3.09984e-06	0.317682
deseq2-5_44000001_53000000	AB_Tu_het_vs_AB_hom	ENSDARG00000101759	homer1b	4.20418e-05	0.163189
deseq2-5_44000001_53000000	AB_Tu_het_vs_AB_hom	ENSDARG00000024693	lysmd3	6.09583e-05	0.193505
deseq2-5_44000001_53000000	AB_Tu_het_vs_AB_hom	ENSDARG00000099679	tent2	0.000104033	0.185986
deseq2-5_44000001_53000000	AB_Tu_het_vs_AB_hom	ENSDARG00000051916	cdk7	0.00348655	-0.20569
deseq2-5_44000001_53000000	AB_Tu_het_vs_AB_hom	ENSDARG00000039929	ckmt2b	0.0206433	-0.129063
deseq2-5_44000001_53000000	AB_Tu_het_vs_AB_hom	ENSDARG00000024325	col4a3bpa	0.0249659	0.199575
deseq2-5_44000001_53000000	AB_Tu_het_vs_AB_hom	ENSDARG00000060012	f2r	0.032741	0.663783
deseq2-5_44000001_53000000	AB_hom_vs_Tu_hom	ENSDARG00000052693	si:dkey-172m14.1	6.74859e-26	0.867284
deseq2-5_44000001_53000000	AB_hom_vs_Tu_hom	ENSDARG00000067664	si:dkey-172m14.2	1.95265e-24	-1.45594
deseq2-5_44000001_53000000	AB_hom_vs_Tu_hom	ENSDARG00000098373	BX276102.1	1.95265e-24	-5.00432
deseq2-5_44000001_53000000	AB_hom_vs_Tu_hom	ENSDARG00000013730	slc4a4a	6.0988e-24	0.303984
deseq2-5_44000001_53000000	AB_hom_vs_Tu_hom	ENSDARG00000035338	tppp2	4.40181e-16	-0.611189
deseq2-5_44000001_53000000	AB_hom_vs_Tu_hom	ENSDARG00000099679	tent2	1.79157e-11	-0.343477
deseq2-5_44000001_53000000	AB_hom_vs_Tu_hom	ENSDARG00000024693	lysmd3	3.63556e-11	-0.344897
deseq2-5_44000001_53000000	AB_hom_vs_Tu_hom	ENSDARG00000101759	homer1b	2.50607e-09	-0.269255
deseq2-5_44000001_53000000	AB_hom_vs_Tu_hom	ENSDARG00000060012	f2r	6.11467e-08	-1.22046
deseq2-5_44000001_53000000	AB_hom_vs_Tu_hom	ENSDARG00000039929	ckmt2b	2.37151e-07	0.248542
deseq2-5_44000001_53000000	AB_hom_vs_Tu_hom	ENSDARG00000078250	zgc:194398	6.99129e-06	-0.371239
deseq2-5_44000001_53000000	AB_hom_vs_Tu_hom	ENSDARG00000108939	FQ378016.1	1.09173e-05	-1.41056
deseq2-5_44000001_53000000	AB_hom_vs_Tu_hom	ENSDARG00000052734	hmgcra	1.09771e-05	-0.78355
deseq2-5_44000001_53000000	AB_hom_vs_Tu_hom	ENSDARG00000024325	col4a3bpa	3.06178e-05	-0.334296
deseq2-5_44000001_53000000	AB_hom_vs_Tu_hom	ENSDARG00000090352	CR855311.1	0.000114903	-1.59016
deseq2-5_44000001_53000000	AB_hom_vs_Tu_hom	ENSDARG00000067795	ifngr2	0.000114903	0.228662
deseq2-5_44000001_53000000	AB_hom_vs_Tu_hom	ENSDARG00000035018	thy1	0.000262664	-0.826139
deseq2-5_44000001_53000000	AB_hom_vs_Tu_hom	ENSDARG00000101479	BX908782.2	0.00042462	-1.85279
deseq2-5_44000001_53000000	AB_hom_vs_Tu_hom	ENSDARG00000059997	sv2ca	0.000516335	-0.468228
deseq2-5_44000001_53000000	AB_hom_vs_Tu_hom	ENSDARG00000074314	ttc37	0.00114272	0.270566
deseq2-5_44000001_53000000	AB_hom_vs_Tu_hom	ENSDARG00000051916	cdk7	0.00119374	0.283764
deseq2-5_44000001_53000000	AB_hom_vs_Tu_hom	ENSDARG00000100476	si:dkeyp-110c7.4	0.00134942	-0.347301
deseq2-5_44000001_53000000	AB_hom_vs_Tu_hom	ENSDARG00000008912	slc8a2a	0.00151981	-0.470706
deseq2-5_44000001_53000000	AB_hom_vs_Tu_hom	ENSDARG00000015937	kptn	0.00250716	-0.280317
deseq2-5_44000001_53000000	AB_hom_vs_Tu_hom	ENSDARG00000059606	ccdc84	0.0040952	-0.364368
deseq2-5_44000001_53000000	AB_hom_vs_Tu_hom	ENSDARG00000086654	cbln11	0.00561003	-1.2262
deseq2-5_44000001_53000000	AB_hom_vs_Tu_hom	ENSDARG00000021137	adgrv1	0.00561003	0.214119
deseq2-5_44000001_53000000	AB_hom_vs_Tu_hom	ENSDARG00000067670	pomt1	0.00674944	0.187333
deseq2-5_44000001_53000000	AB_hom_vs_Tu_hom	ENSDARG00000006409	mapk12b	0.0161279	-1.05586
deseq2-5_44000001_53000000	AB_hom_vs_Tu_hom	ENSDARG00000089362	grn1	0.0161279	-1.00384
deseq2-5_44000001_53000000	AB_hom_vs_Tu_hom	ENSDARG00000116863	CU984579.1	0.021842	-0.519565
deseq2-5_44000001_53000000	AB_hom_vs_Tu_hom	ENSDARG00000095136	si:ch211-130m23.2	0.0340408	-0.707841
deseq2-5_44000001_53000000	AB_hom_vs_Tu_hom	ENSDARG00000055252	snap23.2	0.0492034	-0.50339
deseq2-5_44000001_53000000	AB_Tu_het_vs_Tu_hom	ENSDARG00000052693	si:dkey-172m14.1	1.17744e-09	0.524342
deseq2-5_44000001_53000000	AB_Tu_het_vs_Tu_hom	ENSDARG00000013730	slc4a4a	8.04829e-06	0.154373
deseq2-5_44000001_53000000	AB_Tu_het_vs_Tu_hom	ENSDARG00000035338	tppp2	0.00606463	-0.293507
deseq2-5_44000001_53000000	AB_Tu_het_vs_Tu_hom	ENSDARG00000098373	BX276102.1	0.0142206	-0.932102
deseq2-5_44000001_53000000	AB_Tu_het_vs_Tu_hom	ENSDARG00000101479	BX908782.2	0.0194339	-1.48982
deseq2-6_43000001_48000000	AB_Tu_het_vs_AB_hom	ENSDARG00000042590	rbm19	1.02458e-07	0.23743
deseq2-6_43000001_48000000	AB_Tu_het_vs_AB_hom	ENSDARG00000096954	si:dkeyp-67f1.1	5.65359e-07	-0.467832
deseq2-6_43000001_48000000	AB_Tu_het_vs_AB_hom	ENSDARG00000086724	im:7151449	0.00291937	0.309544
deseq2-6_43000001_48000000	AB_Tu_het_vs_AB_hom	ENSDARG00000040156	grm4	0.0097613	-0.13296
deseq2-6_43000001_48000000	AB_Tu_het_vs_AB_hom	ENSDARG00000112767	LO017951.1	0.0484568	-0.189645
deseq2-6_43000001_48000000	AB_Tu_het_vs_AB_hom	ENSDARG00000080152	dre-mir-29b-1	0.0486648	0.906288
deseq2-6_43000001_48000000	AB_hom_vs_Tu_hom	ENSDARG00000096954	si:dkeyp-67f1.1	6.91255e-37	1.19331
deseq2-6_43000001_48000000	AB_hom_vs_Tu_hom	ENSDARG00000040156	grm4	4.11271e-14	0.272849
deseq2-6_43000001_48000000	AB_hom_vs_Tu_hom	ENSDARG00000042590	rbm19	3.36615e-12	-0.30933
deseq2-6_43000001_48000000	AB_hom_vs_Tu_hom	ENSDARG00000091625	si:dkeyp-67f1.2	2.94555e-10	0.684619
deseq2-6_43000001_48000000	AB_hom_vs_Tu_hom	ENSDARG00000086724	im:7151449	5.95905e-10	-0.493247
deseq2-6_43000001_48000000	AB_hom_vs_Tu_hom	ENSDARG00000086490	si:dkey-92f12.2	1.19757e-08	0.327861
deseq2-6_43000001_48000000	AB_hom_vs_Tu_hom	ENSDARG00000080152	dre-mir-29b-1	1.51656e-08	-1.53397
deseq2-6_43000001_48000000	AB_hom_vs_Tu_hom	ENSDARG00000098161	cntn4	1.5986e-06	0.214309
deseq2-6_43000001_48000000	AB_hom_vs_Tu_hom	ENSDARG00000100446	si:ch211-286o17.1	5.70289e-06	-0.316005
deseq2-6_43000001_48000000	AB_hom_vs_Tu_hom	ENSDARG00000070435	vapb	6.09224e-06	-0.183653
deseq2-6_43000001_48000000	AB_hom_vs_Tu_hom	ENSDARG00000075530	pigu	8.39751e-06	-0.579254
deseq2-6_43000001_48000000	AB_hom_vs_Tu_hom	ENSDARG00000112767	LO017951.1	0.00900093	0.219695
deseq2-6_43000001_48000000	AB_hom_vs_Tu_hom	ENSDARG00000095783	si:dkey-249d8.1	0.00900093	0.433847
deseq2-6_43000001_48000000	AB_hom_vs_Tu_hom	ENSDARG00000020893	slc25a55a	0.015791	0.144924
deseq2-6_43000001_48000000	AB_hom_vs_Tu_hom	ENSDARG00000053447	ppp4r2b	0.0494744	0.131712
deseq2-6_43000001_48000000	AB_Tu_het_vs_Tu_hom	ENSDARG00000096954	si:dkeyp-67f1.1	1.5788e-14	0.72548
deseq2-6_43000001_48000000	AB_Tu_het_vs_Tu_hom	ENSDARG00000040156	grm4	0.00481012	0.139889
deseq2-6_43000001_48000000	AB_Tu_het_vs_Tu_hom	ENSDARG00000086490	si:dkey-92f12.2	0.00699956	0.203875
deseq2-6_43000001_48000000	AB_Tu_het_vs_Tu_hom	ENSDARG00000091625	si:dkeyp-67f1.2	0.0212197	0.378956
deseq2-11_14000001_22000000	AB_Tu_het_vs_Tu_hom	ENSDARG00000096988	CR589944.1	2.11242e-132	4.95531
deseq2-11_14000001_22000000	AB_Tu_het_vs_Tu_hom	ENSDARG00000058256	draxin	2.76337e-09	0.263097
deseq2-11_14000001_22000000	AB_Tu_het_vs_Tu_hom	ENSDARG00000031907	ptbp1b	4.06641e-08	0.210564
deseq2-11_14000001_22000000	AB_Tu_het_vs_Tu_hom	ENSDARG00000016773	cishb	2.31341e-07	0.502186
deseq2-11_14000001_22000000	AB_Tu_het_vs_Tu_hom	ENSDARG00000076120	foxp4	1.46503e-05	0.132168
deseq2-11_14000001_22000000	AB_Tu_het_vs_Tu_hom	ENSDARG00000079740	efna2b	1.46503e-05	0.418923
deseq2-11_14000001_22000000	AB_Tu_het_vs_Tu_hom	ENSDARG00000077404	ncoa3	8.37254e-05	-0.119154
deseq2-11_14000001_22000000	AB_Tu_het_vs_Tu_hom	ENSDARG00000097323	si:ch211-14i3.2	0.000201603	1.09213
deseq2-11_14000001_22000000	AB_Tu_het_vs_Tu_hom	ENSDARG00000086998	zgc:64002	0.000483395	-0.843208
deseq2-11_14000001_22000000	AB_Tu_het_vs_Tu_hom	ENSDARG00000104286	CU019562.3	0.000715354	-1.21578
deseq2-11_14000001_22000000	AB_Tu_het_vs_Tu_hom	ENSDARG00000097955	CT956066.1	0.000715354	2.17335
deseq2-11_14000001_22000000	AB_Tu_het_vs_Tu_hom	ENSDARG00000099409	zgc:162182	0.00130781	0.524119
deseq2-11_14000001_22000000	AB_Tu_het_vs_Tu_hom	ENSDARG00000086505	mast3b	0.00166881	-0.167703
deseq2-11_14000001_22000000	AB_Tu_het_vs_Tu_hom	ENSDARG00000074804	atxn7	0.00204069	0.156588
deseq2-11_14000001_22000000	AB_Tu_het_vs_Tu_hom	ENSDARG00000070059	si:ch211-262i1.5	0.00282157	0.281183
deseq2-11_14000001_22000000	AB_Tu_het_vs_Tu_hom	ENSDARG00000074508	si:dkey-28e7.3	0.00303315	0.158952
deseq2-11_14000001_22000000	AB_Tu_het_vs_Tu_hom	ENSDARG00000097536	CR848844.1	0.00317609	0.700278
deseq2-11_14000001_22000000	AB_Tu_het_vs_Tu_hom	ENSDARG00000096950	BX927244.1	0.00550453	-0.467364
deseq2-11_14000001_22000000	AB_Tu_het_vs_Tu_hom	ENSDARG00000007601	zmynd8	0.0478998	0.115222
deseq2-11_14000001_22000000	AB_Tu_het_vs_Tu_hom	ENSDARG00000053315	tmprss3a	0.0496267	0.374093
deseq2-20_52000001_54000000	AB_Tu_het_vs_AB_hom	ENSDARG00000015236	pycr3	1.81129e-52	0.928124
deseq2-20_52000001_54000000	AB_Tu_het_vs_AB_hom	ENSDARG00000039652	si:dkey-235d18.5	1.26709e-19	0.675306
deseq2-20_52000001_54000000	AB_Tu_het_vs_AB_hom	ENSDARG00000039669	TSTA3 (1 of many)	1.59905e-19	0.584515
deseq2-20_52000001_54000000	AB_Tu_het_vs_AB_hom	ENSDARG00000102877	bphl	8.55344e-08	-0.316278
deseq2-20_52000001_54000000	AB_Tu_het_vs_AB_hom	ENSDARG00000100007	arhgap39	0.00343342	-0.223288
deseq2-20_52000001_54000000	AB_hom_vs_Tu_hom	ENSDARG00000015236	pycr3	1.70543e-111	-1.50588
deseq2-20_52000001_54000000	AB_hom_vs_Tu_hom	ENSDARG00000039652	si:dkey-235d18.5	4.14651e-46	-1.1562
deseq2-20_52000001_54000000	AB_hom_vs_Tu_hom	ENSDARG00000039669	TSTA3 (1 of many)	6.04441e-41	-0.983551
deseq2-20_52000001_54000000	AB_hom_vs_Tu_hom	ENSDARG00000102877	bphl	1.94353e-22	0.619468
deseq2-20_52000001_54000000	AB_hom_vs_Tu_hom	ENSDARG00000100007	arhgap39	2.43858e-13	0.464845
deseq2-20_52000001_54000000	AB_hom_vs_Tu_hom	ENSDARG00000059923	slc25a47a	1.72106e-12	0.619182
deseq2-20_52000001_54000000	AB_hom_vs_Tu_hom	ENSDARG00000023916	phactr1	9.99841e-11	0.342238
deseq2-20_52000001_54000000	AB_hom_vs_Tu_hom	ENSDARG00000052178	eif2s1b	2.59617e-10	-0.317097
deseq2-20_52000001_54000000	AB_hom_vs_Tu_hom	ENSDARG00000093317	si:ch211-209j10.6	1.1696e-06	-1.25591
deseq2-20_52000001_54000000	AB_hom_vs_Tu_hom	ENSDARG00000014532	aida	1.22667e-05	-0.317633
deseq2-20_52000001_54000000	AB_hom_vs_Tu_hom	ENSDARG00000030053	eef1db	1.22667e-05	-0.225616
deseq2-20_52000001_54000000	AB_hom_vs_Tu_hom	ENSDARG00000090708	si:dkey-28g23.6	3.4739e-05	-0.784968
deseq2-20_52000001_54000000	AB_hom_vs_Tu_hom	ENSDARG00000013659	brox	6.12608e-05	-0.317941
deseq2-20_52000001_54000000	AB_hom_vs_Tu_hom	ENSDARG00000052405	pak6b	9.40893e-05	0.534585
deseq2-20_52000001_54000000	AB_hom_vs_Tu_hom	ENSDARG00000029581	tbc1d7	9.40893e-05	-0.292678
deseq2-20_52000001_54000000	AB_hom_vs_Tu_hom	ENSDARG00000096688	CU660013.1	9.61311e-05	-3.19843
deseq2-20_52000001_54000000	AB_hom_vs_Tu_hom	ENSDARG00000110608	CABZ01115113.1	0.00170432	-0.329698
deseq2-20_52000001_54000000	AB_hom_vs_Tu_hom	ENSDARG00000091595	LO018154.1	0.00929077	-0.295439
deseq2-20_52000001_54000000	AB_hom_vs_Tu_hom	ENSDARG00000090120	si:dkey-248g21.1	0.0109942	-0.336282
deseq2-20_52000001_54000000	AB_hom_vs_Tu_hom	ENSDARG00000026811	extl3	0.012831	-0.426751
deseq2-20_52000001_54000000	AB_hom_vs_Tu_hom	ENSDARG00000099801	topaz1	0.012831	-0.521701
deseq2-20_52000001_54000000	AB_hom_vs_Tu_hom	ENSDARG00000093457	si:ch211-14a11.2	0.0133166	-2.54924
deseq2-20_52000001_54000000	AB_hom_vs_Tu_hom	ENSDARG00000092996	BX005329.2	0.0280987	-0.70122
deseq2-20_52000001_54000000	AB_Tu_het_vs_Tu_hom	ENSDARG00000015236	pycr3	4.06741e-21	-0.577759
deseq2-20_52000001_54000000	AB_Tu_het_vs_Tu_hom	ENSDARG00000039652	si:dkey-235d18.5	2.10734e-08	-0.480896
deseq2-20_52000001_54000000	AB_Tu_het_vs_Tu_hom	ENSDARG00000039669	TSTA3 (1 of many)	3.25021e-06	-0.399036
deseq2-20_52000001_54000000	AB_Tu_het_vs_Tu_hom	ENSDARG00000059923	slc25a47a	3.25021e-06	0.436568
deseq2-20_52000001_54000000	AB_Tu_het_vs_Tu_hom	ENSDARG00000102877	bphl	0.000194352	0.30319
deseq2-20_52000001_54000000	AB_Tu_het_vs_Tu_hom	ENSDARG00000023916	phactr1	0.00367091	0.206542
deseq2-20_52000001_54000000	AB_Tu_het_vs_Tu_hom	ENSDARG00000100007	arhgap39	0.0118776	0.241558
deseq2-20_52000001_54000000	AB_Tu_het_vs_Tu_hom	ENSDARG00000090708	si:dkey-28g23.6	0.0238155	-0.562168
deseq2-1_11000001_12000000	AB_Tu_het_vs_AB_hom	ENSDARG00000096564	CU915827.1	1.73546e-50	-0.91238
deseq2-1_11000001_12000000	AB_Tu_het_vs_AB_hom	ENSDARG00000012297	cnga3b	4.05132e-15	0.389167
deseq2-1_11000001_12000000	AB_Tu_het_vs_AB_hom	ENSDARG00000070502	si:dkey-31e10.5	1.10143e-11	-0.762769
deseq2-1_11000001_12000000	AB_Tu_het_vs_AB_hom	ENSDARG00000037679	zgc:103678	8.06863e-09	-0.200148
deseq2-1_11000001_12000000	AB_Tu_het_vs_AB_hom	ENSDARG00000096661	si:ch211-286b5.5	0.00676066	-0.198108
deseq2-1_11000001_12000000	AB_Tu_het_vs_AB_hom	ENSDARG00000061970	lingo3a	0.0102692	0.168499
deseq2-1_11000001_12000000	AB_Tu_het_vs_AB_hom	ENSDARG00000059060	lgalsla	0.0102692	-0.453243
deseq2-1_11000001_12000000	AB_Tu_het_vs_AB_hom	ENSDARG00000004952	rsad2	0.0116704	-1.48124
deseq2-1_11000001_12000000	AB_Tu_het_vs_AB_hom	ENSDARG00000077897	znf296	0.020108	-0.164687
deseq2-1_11000001_12000000	AB_Tu_het_vs_AB_hom	ENSDARG00000075785	si:ch73-190m4.1	0.0358565	-1.55839
deseq2-4_69000001_70000000	AB_Tu_het_vs_Tu_hom	ENSDARG00000085818	RF00001	0.0373706	2.15481
deseq2-13_22000001_37000000	AB_Tu_het_vs_Tu_hom	ENSDARG00000022614	ddx43	4.31519e-191	3.26498
deseq2-13_22000001_37000000	AB_Tu_het_vs_Tu_hom	ENSDARG00000053744	dcdc2b	1.36407e-66	1.35
deseq2-13_22000001_37000000	AB_Tu_het_vs_Tu_hom	ENSDARG00000092483	iqcc	2.33856e-43	0.864575
deseq2-13_22000001_37000000	AB_Tu_het_vs_Tu_hom	ENSDARG00000033566	cyp17a1	2.0669e-31	1.25992
deseq2-13_22000001_37000000	AB_Tu_het_vs_Tu_hom	ENSDARG00000076139	si:dkey-71p21.13	2.6469e-29	2.69251
deseq2-13_22000001_37000000	AB_Tu_het_vs_Tu_hom	ENSDARG00000079249	ogdhl	1.36329e-27	-0.358476
deseq2-13_22000001_37000000	AB_Tu_het_vs_Tu_hom	ENSDARG00000069269	wdr35	1.66821e-21	-0.313052
deseq2-13_22000001_37000000	AB_Tu_het_vs_Tu_hom	ENSDARG00000094491	si:ch211-202m22.1	2.87057e-19	1.55843
deseq2-13_22000001_37000000	AB_Tu_het_vs_Tu_hom	ENSDARG00000102389	ved	5.35094e-19	-0.737155
deseq2-13_22000001_37000000	AB_Tu_het_vs_Tu_hom	ENSDARG00000033285	gsto2	1.03235e-17	0.544108
deseq2-13_22000001_37000000	AB_Tu_het_vs_Tu_hom	ENSDARG00000061525	slka	1.58036e-17	-0.183204
deseq2-13_22000001_37000000	AB_Tu_het_vs_Tu_hom	ENSDARG00000019728	bmpr1aa	1.2886e-16	-0.219217
deseq2-13_22000001_37000000	AB_Tu_het_vs_Tu_hom	ENSDARG00000074502	zmiz1a	1.71592e-16	0.152639
deseq2-13_22000001_37000000	AB_Tu_het_vs_Tu_hom	ENSDARG00000026359	pbld2	1.19941e-14	0.520077
deseq2-13_22000001_37000000	AB_Tu_het_vs_Tu_hom	ENSDARG00000034605	zgc:153169	8.32829e-12	0.433376
deseq2-13_22000001_37000000	AB_Tu_het_vs_Tu_hom	ENSDARG00000021547	vrk2	4.57608e-11	0.377875
deseq2-13_22000001_37000000	AB_Tu_het_vs_Tu_hom	ENSDARG00000003829	galnt2	2.47859e-09	-0.142795
deseq2-13_22000001_37000000	AB_Tu_het_vs_Tu_hom	ENSDARG00000031819	eif4ebp2	9.31672e-09	0.191793
deseq2-13_22000001_37000000	AB_Tu_het_vs_Tu_hom	ENSDARG00000075459	ptpn20	5.96298e-08	0.263033
deseq2-13_22000001_37000000	AB_Tu_het_vs_Tu_hom	ENSDARG00000062019	rufy2	7.72499e-08	-0.189198
deseq2-13_22000001_37000000	AB_Tu_het_vs_Tu_hom	ENSDARG00000002219	si:dkey-103j14.5	1.20575e-07	-0.338232
deseq2-13_22000001_37000000	AB_Tu_het_vs_Tu_hom	ENSDARG00000069529	zgc:153981	1.45106e-07	0.266599
deseq2-13_22000001_37000000	AB_Tu_het_vs_Tu_hom	ENSDARG00000007382	ubtd1a	3.97939e-07	-0.21424
deseq2-13_22000001_37000000	AB_Tu_het_vs_Tu_hom	ENSDARG00000031981	pcbd1	1.15231e-06	0.205732
deseq2-13_22000001_37000000	AB_Tu_het_vs_Tu_hom	ENSDARG00000030265	scdb	3.30903e-06	-0.143545
deseq2-13_22000001_37000000	AB_Tu_het_vs_Tu_hom	ENSDARG00000027172	phactr2	1.24211e-05	-0.176146
deseq2-13_22000001_37000000	AB_Tu_het_vs_Tu_hom	ENSDARG00000040131	zfyve26	1.65305e-05	0.200836
deseq2-13_22000001_37000000	AB_Tu_het_vs_Tu_hom	ENSDARG00000029100	chchd1	1.65601e-05	0.280962
deseq2-13_22000001_37000000	AB_Tu_het_vs_Tu_hom	ENSDARG00000021681	asrgl1	3.89364e-05	0.26961
deseq2-13_22000001_37000000	AB_Tu_het_vs_Tu_hom	ENSDARG00000094739	BX530079.1	4.3906e-05	2.06182
deseq2-13_22000001_37000000	AB_Tu_het_vs_Tu_hom	ENSDARG00000016855	sf3b5	0.000179922	0.305391
deseq2-13_22000001_37000000	AB_Tu_het_vs_Tu_hom	ENSDARG00000030743	sptlc3	0.000232662	0.327426
deseq2-13_22000001_37000000	AB_Tu_het_vs_Tu_hom	ENSDARG00000032155	ppm1aa	0.000252698	-0.190907
deseq2-13_22000001_37000000	AB_Tu_het_vs_Tu_hom	ENSDARG00000007885	fancl	0.000305662	-0.44925
deseq2-13_22000001_37000000	AB_Tu_het_vs_Tu_hom	ENSDARG00000015854	chata	0.000590111	-0.12252
deseq2-13_22000001_37000000	AB_Tu_het_vs_Tu_hom	ENSDARG00000039466	hnrnph3	0.000905267	0.220958
deseq2-13_22000001_37000000	AB_Tu_het_vs_Tu_hom	ENSDARG00000069265	matn3b	0.000905267	-0.268677
deseq2-13_22000001_37000000	AB_Tu_het_vs_Tu_hom	ENSDARG00000079602	calhm3	0.000905267	0.44538
deseq2-13_22000001_37000000	AB_Tu_het_vs_Tu_hom	ENSDARG00000039279	golga5	0.00125526	0.147375
deseq2-13_22000001_37000000	AB_Tu_het_vs_Tu_hom	ENSDARG00000079155	si:ch211-67f13.8	0.00146992	-0.725565
deseq2-13_22000001_37000000	AB_Tu_het_vs_Tu_hom	ENSDARG00000075265	plaua	0.00239325	-0.590779
deseq2-13_22000001_37000000	AB_Tu_het_vs_Tu_hom	ENSDARG00000030441	ppa1b	0.00240417	0.160739
deseq2-13_22000001_37000000	AB_Tu_het_vs_Tu_hom	ENSDARG00000091212	si:dkey-192p21.6	0.00273584	0.522391
deseq2-13_22000001_37000000	AB_Tu_het_vs_Tu_hom	ENSDARG00000075393	spock2	0.00343518	-0.134511
deseq2-13_22000001_37000000	AB_Tu_het_vs_Tu_hom	ENSDARG00000069044	agpat4	0.00394489	-0.217629
deseq2-13_22000001_37000000	AB_Tu_het_vs_Tu_hom	ENSDARG00000057648	dnttip2	0.00394489	0.214233
deseq2-13_22000001_37000000	AB_Tu_het_vs_Tu_hom	ENSDARG00000039486	bag3	0.00424018	0.21513
deseq2-13_22000001_37000000	AB_Tu_het_vs_Tu_hom	ENSDARG00000055305	ret	0.00551074	-0.0948422
deseq2-13_22000001_37000000	AB_Tu_het_vs_Tu_hom	ENSDARG00000011819	pcnx1	0.00766117	-0.113411
deseq2-13_22000001_37000000	AB_Tu_het_vs_Tu_hom	ENSDARG00000006891	kcns3a	0.00881284	-0.178993
deseq2-13_22000001_37000000	AB_Tu_het_vs_Tu_hom	ENSDARG00000117286	CABZ01032351.1	0.0104583	1.24977
deseq2-13_22000001_37000000	AB_Tu_het_vs_Tu_hom	ENSDARG00000039429	adka	0.015724	0.168924
deseq2-13_22000001_37000000	AB_Tu_het_vs_Tu_hom	ENSDARG00000103435	sorbs1	0.015724	0.128476
deseq2-13_22000001_37000000	AB_Tu_het_vs_Tu_hom	ENSDARG00000029663	rab1ab	0.017682	0.102875
deseq2-13_22000001_37000000	AB_Tu_het_vs_Tu_hom	ENSDARG00000039499	soul2	0.0239429	0.213151
deseq2-13_22000001_37000000	AB_Tu_het_vs_Tu_hom	ENSDARG00000077845	si:ch211-67f13.7	0.0249562	-0.56343
deseq2-13_22000001_37000000	AB_Tu_het_vs_Tu_hom	ENSDARG00000060580	tasp1	0.0256557	-0.126274
deseq2-13_22000001_37000000	AB_Tu_het_vs_Tu_hom	ENSDARG00000056206	camk2g2	0.0256557	-0.0696585
deseq2-13_22000001_37000000	AB_Tu_het_vs_Tu_hom	ENSDARG00000078333	tmem234	0.0269994	0.230982
deseq2-13_22000001_37000000	AB_Tu_het_vs_Tu_hom	ENSDARG00000079011	col17a1b	0.0269994	0.206233
deseq2-13_22000001_37000000	AB_Tu_het_vs_Tu_hom	ENSDARG00000054251	pqlc3	0.0295201	-0.205688
deseq2-13_22000001_37000000	AB_Tu_het_vs_Tu_hom	ENSDARG00000075561	si:dkey-76k16.5	0.0311708	-0.422552
deseq2-13_22000001_37000000	AB_Tu_het_vs_Tu_hom	ENSDARG00000112690	CR931802.4	0.0329909	1.04943
deseq2-13_22000001_37000000	AB_Tu_het_vs_Tu_hom	ENSDARG00000017128	myofl	0.0380243	0.232283
deseq2-13_22000001_37000000	AB_Tu_het_vs_Tu_hom	ENSDARG00000111840	cxcl18a.1	0.0408124	-0.567701
deseq2-13_22000001_37000000	AB_Tu_het_vs_Tu_hom	ENSDARG00000039270	vti1b	0.0492014	0.145031
deseq2-8_2000001_3000000	AB_Tu_het_vs_Tu_hom	ENSDARG00000038881	acaa2	3.15636e-32	0.772571
deseq2-8_2000001_3000000	AB_Tu_het_vs_Tu_hom	ENSDARG00000099056	CABZ01065076.1	2.9496e-30	-0.63493
deseq2-8_2000001_3000000	AB_Tu_het_vs_Tu_hom	ENSDARG00000008983	sh3glb2a	8.68001e-07	-0.311579
deseq2-8_2000001_3000000	AB_Tu_het_vs_Tu_hom	ENSDARG00000038518	snap29	1.94564e-06	-0.224966
deseq2-8_2000001_3000000	AB_Tu_het_vs_Tu_hom	ENSDARG00000017140	zgc:63587	4.12979e-05	-0.294141
deseq2-8_2000001_3000000	AB_Tu_het_vs_Tu_hom	ENSDARG00000078551	zgc:171242	0.000129043	1.5879
deseq2-8_2000001_3000000	AB_Tu_het_vs_Tu_hom	ENSDARG00000029479	zgc:86609	0.0013458	0.236764
deseq2-8_2000001_3000000	AB_Tu_het_vs_Tu_hom	ENSDARG00000095437	si:dkeyp-117b11.3	0.00211239	-0.431914
deseq2-8_2000001_3000000	AB_Tu_het_vs_Tu_hom	ENSDARG00000074761	bicdl1	0.00211239	-0.368855
deseq2-8_2000001_3000000	AB_Tu_het_vs_Tu_hom	ENSDARG00000076170	pcsk1nl	0.0108816	-0.17334
deseq2-8_2000001_3000000	AB_Tu_het_vs_Tu_hom	ENSDARG00000076419	si:dkeyp-117b11.2	0.0142153	-0.227259
deseq2-8_2000001_3000000	AB_Tu_het_vs_Tu_hom	ENSDARG00000055723	hsp70l	0.0326779	-0.579543
deseq2-8_2000001_3000000	AB_Tu_het_vs_Tu_hom	ENSDARG00000101205	mbd1a	0.0326779	0.171036
deseq2-8_2000001_3000000	AB_Tu_het_vs_Tu_hom	ENSDARG00000008384	hdac6	0.0476792	-0.134446
deseq2-8_2000001_3000000	AB_Tu_het_vs_Tu_hom	ENSDARG00000093019	si:dkey-83k24.5	0.0495179	-0.821539
deseq2-16_40000001_44000000	AB_Tu_het_vs_AB_hom	ENSDARG00000109267	CABZ01024501.1	4.22531e-144	7.82596
deseq2-16_40000001_44000000	AB_Tu_het_vs_AB_hom	ENSDARG00000095553	lenep	7.15765e-77	2.64132
deseq2-16_40000001_44000000	AB_Tu_het_vs_AB_hom	ENSDARG00000070132	aste1a	1.49457e-47	5.19436
deseq2-16_40000001_44000000	AB_Tu_het_vs_AB_hom	ENSDARG00000097761	BX005234.1	1.71218e-41	1.4414
deseq2-16_40000001_44000000	AB_Tu_het_vs_AB_hom	ENSDARG00000093087	BX649388.3	7.19678e-33	4.28872
deseq2-16_40000001_44000000	AB_Tu_het_vs_AB_hom	ENSDARG00000090190	bcam	3.37058e-26	-0.308899
deseq2-16_40000001_44000000	AB_Tu_het_vs_AB_hom	ENSDARG00000097001	FP245462.1	3.9503e-21	3.52591
deseq2-16_40000001_44000000	AB_Tu_het_vs_AB_hom	ENSDARG00000094400	si:dkey-199f5.6	5.66066e-21	2.88633
deseq2-16_40000001_44000000	AB_Tu_het_vs_AB_hom	ENSDARG00000016573	mroh1	7.71289e-18	0.353799
deseq2-16_40000001_44000000	AB_Tu_het_vs_AB_hom	ENSDARG00000098129	si:dkeyp-97a10.2	1.86986e-17	0.566055
deseq2-16_40000001_44000000	AB_Tu_het_vs_AB_hom	ENSDARG00000075149	nagpa	4.26574e-17	-0.439933
deseq2-16_40000001_44000000	AB_Tu_het_vs_AB_hom	ENSDARG00000117633	CABZ01024499.1	1.34563e-14	3.23786
deseq2-16_40000001_44000000	AB_Tu_het_vs_AB_hom	ENSDARG00000108060	LO017771.1	2.8276e-14	0.887453
deseq2-16_40000001_44000000	AB_Tu_het_vs_AB_hom	ENSDARG00000070170	si:ch211-225p5.8	5.57214e-13	-0.42351
deseq2-16_40000001_44000000	AB_Tu_het_vs_AB_hom	ENSDARG00000086495	BX546500.1	6.27259e-12	-1.74344
deseq2-16_40000001_44000000	AB_Tu_het_vs_AB_hom	ENSDARG00000099412	bcan	1.93835e-11	-0.278135
deseq2-16_40000001_44000000	AB_Tu_het_vs_AB_hom	ENSDARG00000040130	si:ch211-215k15.4	2.77149e-11	-0.820781
deseq2-16_40000001_44000000	AB_Tu_het_vs_AB_hom	ENSDARG00000097819	znf576.1	7.95085e-11	-0.271333
deseq2-16_40000001_44000000	AB_Tu_het_vs_AB_hom	ENSDARG00000069929	CABZ01053976.1	1.20464e-10	0.462492
deseq2-16_40000001_44000000	AB_Tu_het_vs_AB_hom	ENSDARG00000086950	si:ch211-269k10.2	1.2181e-10	0.407928
deseq2-16_40000001_44000000	AB_Tu_het_vs_AB_hom	ENSDARG00000097110	si:dkey-56f14.4	2.27307e-10	-0.990675
deseq2-16_40000001_44000000	AB_Tu_het_vs_AB_hom	ENSDARG00000060222	scn1ba	4.29744e-10	0.223942
deseq2-16_40000001_44000000	AB_Tu_het_vs_AB_hom	ENSDARG00000053215	me1	7.11707e-10	-0.737434
deseq2-16_40000001_44000000	AB_Tu_het_vs_AB_hom	ENSDARG00000076752	tmem67	1.89217e-09	-0.35027
deseq2-16_40000001_44000000	AB_Tu_het_vs_AB_hom	ENSDARG00000104344	ccdc127a	2.66258e-09	-0.386175
deseq2-16_40000001_44000000	AB_Tu_het_vs_AB_hom	ENSDARG00000094929	apoa4b.2	7.47643e-09	0.745368
deseq2-16_40000001_44000000	AB_Tu_het_vs_AB_hom	ENSDARG00000055901	steap4	1.79652e-08	0.499686
deseq2-16_40000001_44000000	AB_Tu_het_vs_AB_hom	ENSDARG00000073799	zgc:194210	2.71212e-08	1.25062
deseq2-16_40000001_44000000	AB_Tu_het_vs_AB_hom	ENSDARG00000032496	pon1	1.46403e-07	-0.379135
deseq2-16_40000001_44000000	AB_Tu_het_vs_AB_hom	ENSDARG00000040251	ctsk	1.4853e-07	0.456065
deseq2-16_40000001_44000000	AB_Tu_het_vs_AB_hom	ENSDARG00000003927	cldn12	1.53588e-07	0.166334
deseq2-16_40000001_44000000	AB_Tu_het_vs_AB_hom	ENSDARG00000089441	si:ch211-105c13.3	2.74017e-07	0.368796
deseq2-16_40000001_44000000	AB_Tu_het_vs_AB_hom	ENSDARG00000100886	si:dkeyp-97a10.1	2.98992e-07	0.593566
deseq2-16_40000001_44000000	AB_Tu_het_vs_AB_hom	ENSDARG00000088693	dcst2	2.98992e-07	1.26124
deseq2-16_40000001_44000000	AB_Tu_het_vs_AB_hom	ENSDARG00000092134	rad54b	3.28191e-07	-0.44845
deseq2-16_40000001_44000000	AB_Tu_het_vs_AB_hom	ENSDARG00000070317	irge4	1.23545e-06	1.43152
deseq2-16_40000001_44000000	AB_Tu_het_vs_AB_hom	ENSDARG00000117273	FO905052.1	1.33068e-06	0.38301
deseq2-16_40000001_44000000	AB_Tu_het_vs_AB_hom	ENSDARG00000082825	dre-let-7d-1	2.18773e-06	2.26203
deseq2-16_40000001_44000000	AB_Tu_het_vs_AB_hom	ENSDARG00000016856	pon2	2.6677e-06	-0.316211
deseq2-16_40000001_44000000	AB_Tu_het_vs_AB_hom	ENSDARG00000040076	pycard	2.6677e-06	0.280239
deseq2-16_40000001_44000000	AB_Tu_het_vs_AB_hom	ENSDARG00000040291	cadm4	3.47108e-06	-0.130014
deseq2-16_40000001_44000000	AB_Tu_het_vs_AB_hom	ENSDARG00000077641	thbs3a	5.54723e-06	-0.295624
deseq2-16_40000001_44000000	AB_Tu_het_vs_AB_hom	ENSDARG00000039943	tent5ba	5.74192e-06	-0.146494
deseq2-16_40000001_44000000	AB_Tu_het_vs_AB_hom	ENSDARG00000040121	psma2	5.89004e-06	-0.192455
deseq2-16_40000001_44000000	AB_Tu_het_vs_AB_hom	ENSDARG00000086847	irgq1	7.60725e-06	1.37537
deseq2-16_40000001_44000000	AB_Tu_het_vs_AB_hom	ENSDARG00000070399	alg2	1.78464e-05	0.294444
deseq2-16_40000001_44000000	AB_Tu_het_vs_AB_hom	ENSDARG00000069995	dpy19l1l	1.89235e-05	-0.297003
deseq2-16_40000001_44000000	AB_Tu_het_vs_AB_hom	ENSDARG00000093232	CR847566.1	2.09365e-05	-0.726793
deseq2-16_40000001_44000000	AB_Tu_het_vs_AB_hom	ENSDARG00000028715	mindy3	3.33688e-05	-0.152094
deseq2-16_40000001_44000000	AB_Tu_het_vs_AB_hom	ENSDARG00000008165	caspa	3.35612e-05	0.335062
deseq2-16_40000001_44000000	AB_Tu_het_vs_AB_hom	ENSDARG00000101481	rbp5	3.65686e-05	0.254384
deseq2-16_40000001_44000000	AB_Tu_het_vs_AB_hom	ENSDARG00000098295	efna3b	4.4045e-05	0.23574
deseq2-16_40000001_44000000	AB_Tu_het_vs_AB_hom	ENSDARG00000013771	ctss2.2	4.66909e-05	0.4503
deseq2-16_40000001_44000000	AB_Tu_het_vs_AB_hom	ENSDARG00000009978	icn	5.08795e-05	-0.304246
deseq2-16_40000001_44000000	AB_Tu_het_vs_AB_hom	ENSDARG00000020890	tmod4	5.4846e-05	0.178683
deseq2-16_40000001_44000000	AB_Tu_het_vs_AB_hom	ENSDARG00000076627	smg9	5.82224e-05	-0.197979
deseq2-16_40000001_44000000	AB_Tu_het_vs_AB_hom	ENSDARG00000117160	CABZ01034596.1	7.47016e-05	-2.88266
deseq2-16_40000001_44000000	AB_Tu_het_vs_AB_hom	ENSDARG00000088452	si:dkey-24i24.3	9.57711e-05	1.40846
deseq2-16_40000001_44000000	AB_Tu_het_vs_AB_hom	ENSDARG00000101543	washc5	0.000113323	-0.138329
deseq2-16_40000001_44000000	AB_Tu_het_vs_AB_hom	ENSDARG00000087564	nek11	0.000130614	1.03185
deseq2-16_40000001_44000000	AB_Tu_het_vs_AB_hom	ENSDARG00000101145	lipeb	0.000141884	0.318024
deseq2-16_40000001_44000000	AB_Tu_het_vs_AB_hom	ENSDARG00000055589	s100t	0.000217894	0.190906
deseq2-16_40000001_44000000	AB_Tu_het_vs_AB_hom	ENSDARG00000097039	CR759845.1	0.000231739	0.594072
deseq2-16_40000001_44000000	AB_Tu_het_vs_AB_hom	ENSDARG00000013734	polr3glb	0.00048853	0.158581
deseq2-16_40000001_44000000	AB_Tu_het_vs_AB_hom	ENSDARG00000016481	ptpn2a	0.000632546	0.150705
deseq2-16_40000001_44000000	AB_Tu_het_vs_AB_hom	ENSDARG00000009250	etfb	0.000700218	-0.111209
deseq2-16_40000001_44000000	AB_Tu_het_vs_AB_hom	ENSDARG00000085572	RF00001	0.000700218	-1.5133
deseq2-16_40000001_44000000	AB_Tu_het_vs_AB_hom	ENSDARG00000010420	ndrg1b	0.0014363	0.344325
deseq2-16_40000001_44000000	AB_Tu_het_vs_AB_hom	ENSDARG00000017143	brd9	0.00149612	-0.139556
deseq2-16_40000001_44000000	AB_Tu_het_vs_AB_hom	ENSDARG00000101313	MCHR2 (1 of many)	0.00160821	1.75093
deseq2-16_40000001_44000000	AB_Tu_het_vs_AB_hom	ENSDARG00000060112	sybu	0.00266876	0.205273
deseq2-16_40000001_44000000	AB_Tu_het_vs_AB_hom	ENSDARG00000111795	CR855311.5	0.00291828	-0.739129
deseq2-16_40000001_44000000	AB_Tu_het_vs_AB_hom	ENSDARG00000099419	CABZ01025780.1	0.00422128	1.53329
deseq2-16_40000001_44000000	AB_Tu_het_vs_AB_hom	ENSDARG00000079543	dpys	0.00422128	-0.189658
deseq2-16_40000001_44000000	AB_Tu_het_vs_AB_hom	ENSDARG00000025254	s100a10b	0.00448939	0.17243
deseq2-16_40000001_44000000	AB_Tu_het_vs_AB_hom	ENSDARG00000040081	zp3d.1	0.00464642	0.703215
deseq2-16_40000001_44000000	AB_Tu_het_vs_AB_hom	ENSDARG00000094881	si:ch211-197h24.8	0.00522751	0.652838
deseq2-16_40000001_44000000	AB_Tu_het_vs_AB_hom	ENSDARG00000089033	rrnad1	0.00528549	-0.246942
deseq2-16_40000001_44000000	AB_Tu_het_vs_AB_hom	ENSDARG00000102717	tmem42a	0.00554902	0.268514
deseq2-16_40000001_44000000	AB_Tu_het_vs_AB_hom	ENSDARG00000086626	im:7147486	0.00723846	0.107301
deseq2-16_40000001_44000000	AB_Tu_het_vs_AB_hom	ENSDARG00000025789	chd4b	0.00726206	0.0742789
deseq2-16_40000001_44000000	AB_Tu_het_vs_AB_hom	ENSDARG00000054914	dgat1b	0.00765979	0.219793
deseq2-16_40000001_44000000	AB_Tu_het_vs_AB_hom	ENSDARG00000040027	osbpl10b	0.00896251	0.136839
deseq2-16_40000001_44000000	AB_Tu_het_vs_AB_hom	ENSDARG00000070455	tmem245	0.00896251	-0.171241
deseq2-16_40000001_44000000	AB_Tu_het_vs_AB_hom	ENSDARG00000020866	apoa4b.2	0.0104514	0.226982
deseq2-16_40000001_44000000	AB_Tu_het_vs_AB_hom	ENSDARG00000100474	LO017721.1	0.014136	2.1451
deseq2-16_40000001_44000000	AB_Tu_het_vs_AB_hom	ENSDARG00000060215	cep85	0.014373	0.108513
deseq2-16_40000001_44000000	AB_Tu_het_vs_AB_hom	ENSDARG00000053479	gdf6a	0.0176917	0.192637
deseq2-16_40000001_44000000	AB_Tu_het_vs_AB_hom	ENSDARG00000021021	trim35-28	0.0179298	0.136296
deseq2-16_40000001_44000000	AB_Tu_het_vs_AB_hom	ENSDARG00000092272	BX511161.1	0.0215541	0.43374
deseq2-16_40000001_44000000	AB_Tu_het_vs_AB_hom	ENSDARG00000005085	ggctb	0.0294454	0.153197
deseq2-16_40000001_44000000	AB_Tu_het_vs_AB_hom	ENSDARG00000057844	zgc:171470	0.0377249	-0.263942
deseq2-16_40000001_44000000	AB_Tu_het_vs_AB_hom	ENSDARG00000059811	smpd5	0.0387864	0.107591
deseq2-16_40000001_44000000	AB_Tu_het_vs_AB_hom	ENSDARG00000075824	virma	0.0409923	0.095569
deseq2-16_40000001_44000000	AB_Tu_het_vs_AB_hom	ENSDARG00000040282	zgc:92590	0.0457854	-1.18634
deseq2-16_40000001_44000000	AB_Tu_het_vs_AB_hom	ENSDARG00000074947	calhm5.1	0.0457854	0.371165
deseq2-16_40000001_44000000	AB_Tu_het_vs_AB_hom	ENSDARG00000070964	si:rp71-15k1.1	0.0490822	-0.43659
deseq2-22_7000001_13000000	AB_Tu_het_vs_AB_hom	ENSDARG00000093402	si:dkey-286j17.4	2.66691e-133	3.32692
deseq2-22_7000001_13000000	AB_Tu_het_vs_AB_hom	ENSDARG00000090600	si:ch211-213a13.1	7.16908e-133	1.54382
deseq2-22_7000001_13000000	AB_Tu_het_vs_AB_hom	ENSDARG00000077068	si:ch211-11p18.6	1.55018e-125	3.17633
deseq2-22_7000001_13000000	AB_Tu_het_vs_AB_hom	ENSDARG00000043173	cela1.3	7.50626e-117	5.25887
deseq2-22_7000001_13000000	AB_Tu_het_vs_AB_hom	ENSDARG00000074844	CABZ01061495.1	1.02127e-86	1.07597
deseq2-22_7000001_13000000	AB_Tu_het_vs_AB_hom	ENSDARG00000109202	BX324216.3	3.79375e-78	1.4962
deseq2-22_7000001_13000000	AB_Tu_het_vs_AB_hom	ENSDARG00000013022	si:ch211-59h6.1	5.51171e-67	7.48812
deseq2-22_7000001_13000000	AB_Tu_het_vs_AB_hom	ENSDARG00000071629	BX511034.1	4.87721e-64	7.36063
deseq2-22_7000001_13000000	AB_Tu_het_vs_AB_hom	ENSDARG00000104640	BX511034.7	2.53986e-56	6.87721
deseq2-22_7000001_13000000	AB_Tu_het_vs_AB_hom	ENSDARG00000099364	BX511034.5	8.37033e-51	6.66578
deseq2-22_7000001_13000000	AB_Tu_het_vs_AB_hom	ENSDARG00000043168	cela1.5	2.13767e-37	5.78749
deseq2-22_7000001_13000000	AB_Tu_het_vs_AB_hom	ENSDARG00000071604	si:ch211-156p11.1	2.15981e-33	2.94028
deseq2-22_7000001_13000000	AB_Tu_het_vs_AB_hom	ENSDARG00000116618	si:ch73-27e22.8	6.84538e-33	5.42883
deseq2-22_7000001_13000000	AB_Tu_het_vs_AB_hom	ENSDARG00000074546	si:ch211-213a13.2	1.0049e-32	-0.556656
deseq2-22_7000001_13000000	AB_Tu_het_vs_AB_hom	ENSDARG00000071590	si:ch211-236g6.1	8.22418e-31	5.1678
deseq2-22_7000001_13000000	AB_Tu_het_vs_AB_hom	ENSDARG00000095643	si:dkey-253d23.3	2.24536e-26	0.570118
deseq2-22_7000001_13000000	AB_Tu_het_vs_AB_hom	ENSDARG00000111515	CABZ01061498.1	4.10316e-25	2.3078
deseq2-22_7000001_13000000	AB_Tu_het_vs_AB_hom	ENSDARG00000040640	si:ch73-44m9.3	8.08444e-24	-1.16525
deseq2-22_7000001_13000000	AB_Tu_het_vs_AB_hom	ENSDARG00000087046	si:ch211-222k6.2	1.15108e-20	1.05745
deseq2-22_7000001_13000000	AB_Tu_het_vs_AB_hom	ENSDARG00000109109	FO393424.2	8.27305e-20	4.41853
deseq2-22_7000001_13000000	AB_Tu_het_vs_AB_hom	ENSDARG00000004840	rassf1	1.56742e-15	0.289554
deseq2-22_7000001_13000000	AB_Tu_het_vs_AB_hom	ENSDARG00000109368	si:dkey-182g1.2	6.25662e-15	-1.00674
deseq2-22_7000001_13000000	AB_Tu_het_vs_AB_hom	ENSDARG00000093024	si:ch211-213a13.2	3.40178e-13	-0.652438
deseq2-22_7000001_13000000	AB_Tu_het_vs_AB_hom	ENSDARG00000043131	BX664625.1	3.61974e-13	1.91835
deseq2-22_7000001_13000000	AB_Tu_het_vs_AB_hom	ENSDARG00000079986	BX927329.1	9.03592e-13	1.72733
deseq2-22_7000001_13000000	AB_Tu_het_vs_AB_hom	ENSDARG00000077115	si:ch73-44m9.1	3.68541e-12	-0.814484
deseq2-22_7000001_13000000	AB_Tu_het_vs_AB_hom	ENSDARG00000043171	cela1.4	1.1936e-11	0.96114
deseq2-22_7000001_13000000	AB_Tu_het_vs_AB_hom	ENSDARG00000077415	zmp:0000001175	1.76113e-11	1.51768
deseq2-22_7000001_13000000	AB_Tu_het_vs_AB_hom	ENSDARG00000008306	rdh5	2.74531e-11	0.301436
deseq2-22_7000001_13000000	AB_Tu_het_vs_AB_hom	ENSDARG00000058537	si:dkey-102c8.2	2.91701e-11	-1.06455
deseq2-22_7000001_13000000	AB_Tu_het_vs_AB_hom	ENSDARG00000093964	si:ch211-250k18.6	3.35873e-11	-0.614567
deseq2-22_7000001_13000000	AB_Tu_het_vs_AB_hom	ENSDARG00000108332	FO393424.1	5.86623e-10	3.37381
deseq2-22_7000001_13000000	AB_Tu_het_vs_AB_hom	ENSDARG00000095147	krt96	1.34698e-09	-0.792217
deseq2-22_7000001_13000000	AB_Tu_het_vs_AB_hom	ENSDARG00000092266	si:ch73-27e22.2	3.26988e-09	-1.52598
deseq2-22_7000001_13000000	AB_Tu_het_vs_AB_hom	ENSDARG00000095820	BX649485.4	3.52251e-09	3.63034
deseq2-22_7000001_13000000	AB_Tu_het_vs_AB_hom	ENSDARG00000116843	BX324216.4	3.52251e-09	2.7825
deseq2-22_7000001_13000000	AB_Tu_het_vs_AB_hom	ENSDARG00000003446	ippk	6.3605e-09	0.40258
deseq2-22_7000001_13000000	AB_Tu_het_vs_AB_hom	ENSDARG00000091230	CR450686.1	1.62612e-07	2.96186
deseq2-22_7000001_13000000	AB_Tu_het_vs_AB_hom	ENSDARG00000094089	sult3st3	4.18707e-07	3.98608
deseq2-22_7000001_13000000	AB_Tu_het_vs_AB_hom	ENSDARG00000113572	si:dkey-102c8.3	6.14625e-07	0.3781
deseq2-22_7000001_13000000	AB_Tu_het_vs_AB_hom	ENSDARG00000029841	tmprss9	6.5384e-07	0.359648
deseq2-22_7000001_13000000	AB_Tu_het_vs_AB_hom	ENSDARG00000099023	CABZ01034698.1	2.08746e-06	-0.950289
deseq2-22_7000001_13000000	AB_Tu_het_vs_AB_hom	ENSDARG00000111423	si:ch73-27e22.1	2.26133e-06	-1.06546
deseq2-22_7000001_13000000	AB_Tu_het_vs_AB_hom	ENSDARG00000071578	si:ch211-222k6.3	3.46837e-06	0.405979
deseq2-22_7000001_13000000	AB_Tu_het_vs_AB_hom	ENSDARG00000115428	CABZ01101813.1	5.42351e-06	0.765178
deseq2-22_7000001_13000000	AB_Tu_het_vs_AB_hom	ENSDARG00000117520	FO393424.4	5.92329e-06	2.78504
deseq2-22_7000001_13000000	AB_Tu_het_vs_AB_hom	ENSDARG00000087623	BX649485.1	1.24892e-05	2.75239
deseq2-22_7000001_13000000	AB_Tu_het_vs_AB_hom	ENSDARG00000095801	BX649485.2	1.30897e-05	2.64067
deseq2-22_7000001_13000000	AB_Tu_het_vs_AB_hom	ENSDARG00000071589	si:dkey-253d23.2	1.39332e-05	0.283786
deseq2-22_7000001_13000000	AB_Tu_het_vs_AB_hom	ENSDARG00000040141	si:ch73-138e16.5	5.99217e-05	1.23188
deseq2-22_7000001_13000000	AB_Tu_het_vs_AB_hom	ENSDARG00000071518	krt222	0.000134175	-0.170166
deseq2-22_7000001_13000000	AB_Tu_het_vs_AB_hom	ENSDARG00000079236	si:dkey-253d23.11	0.000159265	0.543405
deseq2-22_7000001_13000000	AB_Tu_het_vs_AB_hom	ENSDARG00000055831	si:dkey-182g1.6	0.00016129	1.61
deseq2-22_7000001_13000000	AB_Tu_het_vs_AB_hom	ENSDARG00000032087	sgsh	0.000176812	-0.286857
deseq2-22_7000001_13000000	AB_Tu_het_vs_AB_hom	ENSDARG00000099428	si:dkey-15h8.17	0.000312401	1.63842
deseq2-22_7000001_13000000	AB_Tu_het_vs_AB_hom	ENSDARG00000102678	znf1181	0.000615285	0.359474
deseq2-22_7000001_13000000	AB_Tu_het_vs_AB_hom	ENSDARG00000059367	mfap2	0.000759754	0.365796
deseq2-22_7000001_13000000	AB_Tu_het_vs_AB_hom	ENSDARG00000094427	si:dkey-253d23.8	0.000868047	0.821999
deseq2-22_7000001_13000000	AB_Tu_het_vs_AB_hom	ENSDARG00000076965	cep70	0.000868047	0.325467
deseq2-22_7000001_13000000	AB_Tu_het_vs_AB_hom	ENSDARG00000100755	CU074330.1	0.000875747	1.47718
deseq2-22_7000001_13000000	AB_Tu_het_vs_AB_hom	ENSDARG00000104894	si:ch73-138e16.2	0.00111305	-0.356394
deseq2-22_7000001_13000000	AB_Tu_het_vs_AB_hom	ENSDARG00000007421	ftcd	0.00149247	-0.275069
deseq2-22_7000001_13000000	AB_Tu_het_vs_AB_hom	ENSDARG00000117571	BX927329.2	0.00191703	2.40244
deseq2-22_7000001_13000000	AB_Tu_het_vs_AB_hom	ENSDARG00000113065	AL929276.1	0.00195372	2.27824
deseq2-22_7000001_13000000	AB_Tu_het_vs_AB_hom	ENSDARG00000098800	znf1156	0.00220906	1.78142
deseq2-22_7000001_13000000	AB_Tu_het_vs_AB_hom	ENSDARG00000078476	znf990	0.00289194	0.514253
deseq2-22_7000001_13000000	AB_Tu_het_vs_AB_hom	ENSDARG00000040781	sult3st4	0.00367866	-0.68244
deseq2-22_7000001_13000000	AB_Tu_het_vs_AB_hom	ENSDARG00000000229	usp49	0.00520512	0.267908
deseq2-22_7000001_13000000	AB_Tu_het_vs_AB_hom	ENSDARG00000071588	BX539307.1	0.00588359	-0.984876
deseq2-22_7000001_13000000	AB_Tu_het_vs_AB_hom	ENSDARG00000073820	zgc:174917	0.00726657	1.88461
deseq2-22_7000001_13000000	AB_Tu_het_vs_AB_hom	ENSDARG00000068749	si:ch211-250k18.5	0.00726657	-0.682106
deseq2-22_7000001_13000000	AB_Tu_het_vs_AB_hom	ENSDARG00000079325	CABZ01046432.1	0.00826693	-0.988054
deseq2-22_7000001_13000000	AB_Tu_het_vs_AB_hom	ENSDARG00000002293	si:ch211-197g15.6	0.00853387	0.497824
deseq2-22_7000001_13000000	AB_Tu_het_vs_AB_hom	ENSDARG00000112723	LO018508.1	0.010033	-0.49629
deseq2-22_7000001_13000000	AB_Tu_het_vs_AB_hom	ENSDARG00000102602	si:ch211-220m17.4	0.0150671	0.528416
deseq2-22_7000001_13000000	AB_Tu_het_vs_AB_hom	ENSDARG00000112931	ndufaf3	0.0171214	-0.311757
deseq2-22_7000001_13000000	AB_Tu_het_vs_AB_hom	ENSDARG00000098740	CABZ01046427.2	0.0171884	-0.885643
deseq2-22_7000001_13000000	AB_Tu_het_vs_AB_hom	ENSDARG00000058322	enc3	0.0287133	0.129077
deseq2-22_7000001_13000000	AB_Tu_het_vs_AB_hom	ENSDARG00000068474	si:dkey-94e7.2	0.0287133	0.294792
deseq2-22_7000001_13000000	AB_Tu_het_vs_AB_hom	ENSDARG00000079762	si:dkey-253d23.4	0.0315082	0.196978
deseq2-22_7000001_13000000	AB_Tu_het_vs_AB_hom	ENSDARG00000042308	arhgef18b	0.0386909	0.246577
deseq2-22_7000001_13000000	AB_Tu_het_vs_AB_hom	ENSDARG00000116833	CABZ01077220.2	0.0395939	-0.255401
deseq2-22_7000001_13000000	AB_Tu_het_vs_AB_hom	ENSDARG00000012381	hsc70	0.0403066	0.195515
deseq2-22_7000001_13000000	AB_Tu_het_vs_AB_hom	ENSDARG00000034667	CABZ01090041.1	0.044194	-0.468143
deseq2-22_7000001_13000000	AB_Tu_het_vs_AB_hom	ENSDARG00000013681	si:dkey-42i9.6	0.0458154	0.101618
deseq2-22_7000001_13000000	AB_Tu_het_vs_AB_hom	ENSDARG00000016143	xiap	0.0479233	-0.158662
deseq2-22_7000001_13000000	AB_hom_vs_Tu_hom	ENSDARG00000090600	si:ch211-213a13.1	4.25154e-243	-2.25984
deseq2-22_7000001_13000000	AB_hom_vs_Tu_hom	ENSDARG00000093402	si:dkey-286j17.4	1.74909e-195	-4.17014
deseq2-22_7000001_13000000	AB_hom_vs_Tu_hom	ENSDARG00000077068	si:ch211-11p18.6	1.42641e-173	-3.94909
deseq2-22_7000001_13000000	AB_hom_vs_Tu_hom	ENSDARG00000074844	CABZ01061495.1	7.37506e-152	-1.58016
deseq2-22_7000001_13000000	AB_hom_vs_Tu_hom	ENSDARG00000043173	cela1.3	4.42875e-149	-6.27023
deseq2-22_7000001_13000000	AB_hom_vs_Tu_hom	ENSDARG00000109202	BX324216.3	7.96136e-145	-2.13649
deseq2-22_7000001_13000000	AB_hom_vs_Tu_hom	ENSDARG00000074546	si:ch211-213a13.2	4.7919e-110	1.27621
deseq2-22_7000001_13000000	AB_hom_vs_Tu_hom	ENSDARG00000013022	si:ch211-59h6.1	1.35104e-84	-8.4163
deseq2-22_7000001_13000000	AB_hom_vs_Tu_hom	ENSDARG00000093024	si:ch211-213a13.2	7.03553e-81	2.09892
deseq2-22_7000001_13000000	AB_hom_vs_Tu_hom	ENSDARG00000071629	BX511034.1	8.13695e-81	-8.27978
deseq2-22_7000001_13000000	AB_hom_vs_Tu_hom	ENSDARG00000104640	BX511034.7	1.35633e-73	-7.84939
deseq2-22_7000001_13000000	AB_hom_vs_Tu_hom	ENSDARG00000099364	BX511034.5	3.97857e-62	-7.41457
deseq2-22_7000001_13000000	AB_hom_vs_Tu_hom	ENSDARG00000095643	si:dkey-253d23.3	1.43707e-59	-0.92764
deseq2-22_7000001_13000000	AB_hom_vs_Tu_hom	ENSDARG00000004840	rassf1	8.41818e-52	-0.578136
deseq2-22_7000001_13000000	AB_hom_vs_Tu_hom	ENSDARG00000043168	cela1.5	2.26862e-50	-6.74203
deseq2-22_7000001_13000000	AB_hom_vs_Tu_hom	ENSDARG00000040640	si:ch73-44m9.3	1.0521e-47	5.18334
deseq2-22_7000001_13000000	AB_hom_vs_Tu_hom	ENSDARG00000116618	si:ch73-27e22.8	7.64414e-46	-6.40719
deseq2-22_7000001_13000000	AB_hom_vs_Tu_hom	ENSDARG00000099006	CABZ01029938.1	8.62534e-45	5.02842
deseq2-22_7000001_13000000	AB_hom_vs_Tu_hom	ENSDARG00000071590	si:ch211-236g6.1	6.30056e-43	-6.07746
deseq2-22_7000001_13000000	AB_hom_vs_Tu_hom	ENSDARG00000111515	CABZ01061498.1	9.6988e-42	-3.02675
deseq2-22_7000001_13000000	AB_hom_vs_Tu_hom	ENSDARG00000071604	si:ch211-156p11.1	7.3205e-41	-3.44246
deseq2-22_7000001_13000000	AB_hom_vs_Tu_hom	ENSDARG00000087046	si:ch211-222k6.2	2.29958e-39	-1.54526
deseq2-22_7000001_13000000	AB_hom_vs_Tu_hom	ENSDARG00000077058	cela1.5	2.21662e-38	4.81071
deseq2-22_7000001_13000000	AB_hom_vs_Tu_hom	ENSDARG00000099511	CABZ01034698.2	2.97818e-38	4.90269
deseq2-22_7000001_13000000	AB_hom_vs_Tu_hom	ENSDARG00000109368	si:dkey-182g1.2	7.68797e-38	4.88899
deseq2-22_7000001_13000000	AB_hom_vs_Tu_hom	ENSDARG00000093964	si:ch211-250k18.6	1.66281e-34	1.45256
deseq2-22_7000001_13000000	AB_hom_vs_Tu_hom	ENSDARG00000077115	si:ch73-44m9.1	1.7471e-34	5.02991
deseq2-22_7000001_13000000	AB_hom_vs_Tu_hom	ENSDARG00000095147	krt96	2.18287e-34	1.68938
deseq2-22_7000001_13000000	AB_hom_vs_Tu_hom	ENSDARG00000109109	FO393424.2	1.80614e-28	-5.3083
deseq2-22_7000001_13000000	AB_hom_vs_Tu_hom	ENSDARG00000058537	si:dkey-102c8.2	3.4495e-28	5.03896
deseq2-22_7000001_13000000	AB_hom_vs_Tu_hom	ENSDARG00000043131	BX664625.1	7.95953e-28	-2.77983
deseq2-22_7000001_13000000	AB_hom_vs_Tu_hom	ENSDARG00000008306	rdh5	1.0783e-27	-0.52095
deseq2-22_7000001_13000000	AB_hom_vs_Tu_hom	ENSDARG00000092890	si:ch73-44m9.5	1.63175e-24	4.92853
deseq2-22_7000001_13000000	AB_hom_vs_Tu_hom	ENSDARG00000043171	cela1.4	1.09892e-22	-1.49535
deseq2-22_7000001_13000000	AB_hom_vs_Tu_hom	ENSDARG00000079645	sc:d217	1.43307e-22	4.58405
deseq2-22_7000001_13000000	AB_hom_vs_Tu_hom	ENSDARG00000111423	si:ch73-27e22.1	1.64232e-22	3.96925
deseq2-22_7000001_13000000	AB_hom_vs_Tu_hom	ENSDARG00000077415	zmp:0000001175	1.83379e-21	-2.1034
deseq2-22_7000001_13000000	AB_hom_vs_Tu_hom	ENSDARG00000108332	FO393424.1	2.64698e-21	-4.78669
deseq2-22_7000001_13000000	AB_hom_vs_Tu_hom	ENSDARG00000092266	si:ch73-27e22.2	9.60762e-21	4.508
deseq2-22_7000001_13000000	AB_hom_vs_Tu_hom	ENSDARG00000079986	BX927329.1	9.66123e-21	-2.25089
deseq2-22_7000001_13000000	AB_hom_vs_Tu_hom	ENSDARG00000095820	BX649485.4	2.41833e-20	-5.39842
deseq2-22_7000001_13000000	AB_hom_vs_Tu_hom	ENSDARG00000098740	CABZ01046427.2	1.43218e-19	4.50087
deseq2-22_7000001_13000000	AB_hom_vs_Tu_hom	ENSDARG00000099023	CABZ01034698.1	3.87235e-19	3.91512
deseq2-22_7000001_13000000	AB_hom_vs_Tu_hom	ENSDARG00000029841	tmprss9	4.06706e-18	-0.616854
deseq2-22_7000001_13000000	AB_hom_vs_Tu_hom	ENSDARG00000071588	BX539307.1	1.39734e-17	4.25052
deseq2-22_7000001_13000000	AB_hom_vs_Tu_hom	ENSDARG00000007421	ftcd	2.04716e-16	0.61571
deseq2-22_7000001_13000000	AB_hom_vs_Tu_hom	ENSDARG00000116833	CABZ01077220.2	2.06484e-16	0.738156
deseq2-22_7000001_13000000	AB_hom_vs_Tu_hom	ENSDARG00000113572	si:dkey-102c8.3	2.65289e-16	-0.629398
deseq2-22_7000001_13000000	AB_hom_vs_Tu_hom	ENSDARG00000116843	BX324216.4	2.48876e-15	-3.55014
deseq2-22_7000001_13000000	AB_hom_vs_Tu_hom	ENSDARG00000095801	BX649485.2	3.33521e-15	-4.25565
deseq2-22_7000001_13000000	AB_hom_vs_Tu_hom	ENSDARG00000071518	krt222	4.2823e-15	0.33186
deseq2-22_7000001_13000000	AB_hom_vs_Tu_hom	ENSDARG00000087623	BX649485.1	4.15937e-14	-4.15838
deseq2-22_7000001_13000000	AB_hom_vs_Tu_hom	ENSDARG00000076965	cep70	4.79706e-14	-0.629449
deseq2-22_7000001_13000000	AB_hom_vs_Tu_hom	ENSDARG00000079325	CABZ01046432.1	9.45983e-14	3.75946
deseq2-22_7000001_13000000	AB_hom_vs_Tu_hom	ENSDARG00000003446	ippk	1.37021e-13	-0.548346
deseq2-22_7000001_13000000	AB_hom_vs_Tu_hom	ENSDARG00000093761	si:ch211-250k18.7	7.45452e-13	1.89152
deseq2-22_7000001_13000000	AB_hom_vs_Tu_hom	ENSDARG00000032087	sgsh	9.40333e-13	0.525763
deseq2-22_7000001_13000000	AB_hom_vs_Tu_hom	ENSDARG00000058322	enc3	1.34174e-12	-0.293659
deseq2-22_7000001_13000000	AB_hom_vs_Tu_hom	ENSDARG00000094427	si:dkey-253d23.8	2.83046e-10	-1.31923
deseq2-22_7000001_13000000	AB_hom_vs_Tu_hom	ENSDARG00000055831	si:dkey-182g1.6	3.77358e-10	-2.32741
deseq2-22_7000001_13000000	AB_hom_vs_Tu_hom	ENSDARG00000091230	CR450686.1	6.00878e-10	-3.43944
deseq2-22_7000001_13000000	AB_hom_vs_Tu_hom	ENSDARG00000117520	FO393424.4	1.05054e-09	-3.52351
deseq2-22_7000001_13000000	AB_hom_vs_Tu_hom	ENSDARG00000113065	AL929276.1	1.30796e-09	-3.48653
deseq2-22_7000001_13000000	AB_hom_vs_Tu_hom	ENSDARG00000068749	si:ch211-250k18.5	1.54179e-09	1.5367
deseq2-22_7000001_13000000	AB_hom_vs_Tu_hom	ENSDARG00000071578	si:ch211-222k6.3	4.48597e-09	-0.5368
deseq2-22_7000001_13000000	AB_hom_vs_Tu_hom	ENSDARG00000013681	si:dkey-42i9.6	4.56521e-09	-0.207786
deseq2-22_7000001_13000000	AB_hom_vs_Tu_hom	ENSDARG00000094089	sult3st3	5.89812e-09	-4.74258
deseq2-22_7000001_13000000	AB_hom_vs_Tu_hom	ENSDARG00000103309	BX664625.4	1.21798e-08	3.3799
deseq2-22_7000001_13000000	AB_hom_vs_Tu_hom	ENSDARG00000115428	CABZ01101813.1	1.59619e-08	-1.00645
deseq2-22_7000001_13000000	AB_hom_vs_Tu_hom	ENSDARG00000078476	znf990	3.04478e-08	-0.820554
deseq2-22_7000001_13000000	AB_hom_vs_Tu_hom	ENSDARG00000079236	si:dkey-253d23.11	3.64254e-08	-0.759645
deseq2-22_7000001_13000000	AB_hom_vs_Tu_hom	ENSDARG00000040781	sult3st4	1.11094e-07	1.14037
deseq2-22_7000001_13000000	AB_hom_vs_Tu_hom	ENSDARG00000075476	nlrp15	2.07403e-07	2.96915
deseq2-22_7000001_13000000	AB_hom_vs_Tu_hom	ENSDARG00000058566	si:dkey-253d23.5	2.09367e-07	0.495037
deseq2-22_7000001_13000000	AB_hom_vs_Tu_hom	ENSDARG00000099428	si:dkey-15h8.17	5.57713e-07	-2.26184
deseq2-22_7000001_13000000	AB_hom_vs_Tu_hom	ENSDARG00000095462	cela1.2	6.33944e-07	-0.837186
deseq2-22_7000001_13000000	AB_hom_vs_Tu_hom	ENSDARG00000079762	si:dkey-253d23.4	1.07325e-06	-0.341969
deseq2-22_7000001_13000000	AB_hom_vs_Tu_hom	ENSDARG00000104894	si:ch73-138e16.2	1.29932e-06	0.533794
deseq2-22_7000001_13000000	AB_hom_vs_Tu_hom	ENSDARG00000043055	hiat1b	1.55818e-06	-0.202117
deseq2-22_7000001_13000000	AB_hom_vs_Tu_hom	ENSDARG00000104142	si:dkey-15h8.10	2.35944e-06	-2.83024
deseq2-22_7000001_13000000	AB_hom_vs_Tu_hom	ENSDARG00000036510	ccnt2b	2.51994e-06	-0.134051
deseq2-22_7000001_13000000	AB_hom_vs_Tu_hom	ENSDARG00000063051	bap1	2.70925e-06	-0.181474
deseq2-22_7000001_13000000	AB_hom_vs_Tu_hom	ENSDARG00000040141	si:ch73-138e16.5	3.76936e-06	-1.46756
deseq2-22_7000001_13000000	AB_hom_vs_Tu_hom	ENSDARG00000008735	atp6ap2	6.67086e-06	-0.233077
deseq2-22_7000001_13000000	AB_hom_vs_Tu_hom	ENSDARG00000002293	si:ch211-197g15.6	9.34355e-06	-0.736769
deseq2-22_7000001_13000000	AB_hom_vs_Tu_hom	ENSDARG00000043077	nisch	9.36058e-06	-0.208424
deseq2-22_7000001_13000000	AB_hom_vs_Tu_hom	ENSDARG00000071589	si:dkey-253d23.2	9.43443e-06	-0.321847
deseq2-22_7000001_13000000	AB_hom_vs_Tu_hom	ENSDARG00000059367	mfap2	1.01172e-05	-0.485324
deseq2-22_7000001_13000000	AB_hom_vs_Tu_hom	ENSDARG00000020054	aox6	1.41643e-05	0.369669
deseq2-22_7000001_13000000	AB_hom_vs_Tu_hom	ENSDARG00000086584	CABZ01077217.2	2.51915e-05	-1.64559
deseq2-22_7000001_13000000	AB_hom_vs_Tu_hom	ENSDARG00000100755	CU074330.1	3.37275e-05	-1.78985
deseq2-22_7000001_13000000	AB_hom_vs_Tu_hom	ENSDARG00000093345	si:ch73-27e22.7	3.42144e-05	2.63188
deseq2-22_7000001_13000000	AB_hom_vs_Tu_hom	ENSDARG00000071549	ecm2	3.42189e-05	0.377036
deseq2-22_7000001_13000000	AB_hom_vs_Tu_hom	ENSDARG00000098800	znf1156	3.46936e-05	-2.37978
deseq2-22_7000001_13000000	AB_hom_vs_Tu_hom	ENSDARG00000102678	znf1181	4.57225e-05	-0.439311
deseq2-22_7000001_13000000	AB_hom_vs_Tu_hom	ENSDARG00000088227	tmem163b	6.10836e-05	0.299011
deseq2-22_7000001_13000000	AB_hom_vs_Tu_hom	ENSDARG00000114409	CR450686.5	0.000125933	-2.91066
deseq2-22_7000001_13000000	AB_hom_vs_Tu_hom	ENSDARG00000042308	arhgef18b	0.000233982	-0.358907
deseq2-22_7000001_13000000	AB_hom_vs_Tu_hom	ENSDARG00000034667	CABZ01090041.1	0.000237467	0.705283
deseq2-22_7000001_13000000	AB_hom_vs_Tu_hom	ENSDARG00000071543	si:dkey-42i9.7	0.000245188	-2.54364
deseq2-22_7000001_13000000	AB_hom_vs_Tu_hom	ENSDARG00000093873	BX324213.1	0.000327415	-2.57321
deseq2-22_7000001_13000000	AB_hom_vs_Tu_hom	ENSDARG00000011152	rpp14	0.000526851	-0.31795
deseq2-22_7000001_13000000	AB_hom_vs_Tu_hom	ENSDARG00000093787	CR450686.3	0.000663441	-1.44248
deseq2-22_7000001_13000000	AB_hom_vs_Tu_hom	ENSDARG00000055841	CABZ01046427.1	0.00119468	2.64338
deseq2-22_7000001_13000000	AB_hom_vs_Tu_hom	ENSDARG00000042742	stx6	0.00119468	-0.222208
deseq2-22_7000001_13000000	AB_hom_vs_Tu_hom	ENSDARG00000055334	zmp:0000000652	0.0012447	-2.70743
deseq2-22_7000001_13000000	AB_hom_vs_Tu_hom	ENSDARG00000071355	si:ch211-197g15.7	0.00135313	1.00088
deseq2-22_7000001_13000000	AB_hom_vs_Tu_hom	ENSDARG00000116259	chia.6	0.00139888	-1.15626
deseq2-22_7000001_13000000	AB_hom_vs_Tu_hom	ENSDARG00000102295	dnaja3b	0.00148556	-0.228688
deseq2-22_7000001_13000000	AB_hom_vs_Tu_hom	ENSDARG00000112301	CU570881.2	0.00150816	0.725275
deseq2-22_7000001_13000000	AB_hom_vs_Tu_hom	ENSDARG00000041609	adarb1a	0.00150939	0.17602
deseq2-22_7000001_13000000	AB_hom_vs_Tu_hom	ENSDARG00000002917	gls2b	0.00161869	0.493875
deseq2-22_7000001_13000000	AB_hom_vs_Tu_hom	ENSDARG00000017798	bcor	0.00201957	0.147223
deseq2-22_7000001_13000000	AB_hom_vs_Tu_hom	ENSDARG00000101926	zgc:101130	0.00204387	0.279018
deseq2-22_7000001_13000000	AB_hom_vs_Tu_hom	ENSDARG00000042753	cts12	0.0021148	-0.556965
deseq2-22_7000001_13000000	AB_hom_vs_Tu_hom	ENSDARG00000042992	crygs1	0.0021849	2.55719
deseq2-22_7000001_13000000	AB_hom_vs_Tu_hom	ENSDARG00000093538	CR450686.2	0.00359569	-2.68305
deseq2-22_7000001_13000000	AB_hom_vs_Tu_hom	ENSDARG00000052680	si:dkey-182g1.2	0.00391729	-0.254135
deseq2-22_7000001_13000000	AB_hom_vs_Tu_hom	ENSDARG00000046002	necap2	0.00393333	-0.197893
deseq2-22_7000001_13000000	AB_hom_vs_Tu_hom	ENSDARG00000105075	BX324216.2	0.00407784	0.345839
deseq2-22_7000001_13000000	AB_hom_vs_Tu_hom	ENSDARG00000075768	sdhb	0.00481147	-0.170575
deseq2-22_7000001_13000000	AB_hom_vs_Tu_hom	ENSDARG00000000229	usp49	0.00500996	-0.300264
deseq2-22_7000001_13000000	AB_hom_vs_Tu_hom	ENSDARG00000094388	celsr2	0.00589517	-0.415095
deseq2-22_7000001_13000000	AB_hom_vs_Tu_hom	ENSDARG00000116789	CR352310.1	0.00819536	0.365131
deseq2-22_7000001_13000000	AB_hom_vs_Tu_hom	ENSDARG00000093297	CU570889.1	0.00919549	-1.48872
deseq2-22_7000001_13000000	AB_hom_vs_Tu_hom	ENSDARG00000031731	si:ch73-27e22.6	0.0104959	2.59092
deseq2-22_7000001_13000000	AB_hom_vs_Tu_hom	ENSDARG00000025340	tusc2b	0.0104959	-0.161784
deseq2-22_7000001_13000000	AB_hom_vs_Tu_hom	ENSDARG00000102493	ticam1	0.0110416	-0.308348
deseq2-22_7000001_13000000	AB_hom_vs_Tu_hom	ENSDARG00000036084	itln2	0.013101	-2.61585
deseq2-22_7000001_13000000	AB_hom_vs_Tu_hom	ENSDARG00000071506	mgat5	0.0136123	0.132505
deseq2-22_7000001_13000000	AB_hom_vs_Tu_hom	ENSDARG00000021346	pdhb	0.0146884	0.142618
deseq2-22_7000001_13000000	AB_hom_vs_Tu_hom	ENSDARG00000062355	axdnd1	0.0185039	0.425108
deseq2-22_7000001_13000000	AB_hom_vs_Tu_hom	ENSDARG00000009134	hlx1	0.0185039	-0.242898
deseq2-22_7000001_13000000	AB_hom_vs_Tu_hom	ENSDARG00000055295	cyb561d1	0.0199985	0.675807
deseq2-22_7000001_13000000	AB_hom_vs_Tu_hom	ENSDARG00000057159	ankrd29	0.0215786	0.375015
deseq2-22_7000001_13000000	AB_hom_vs_Tu_hom	ENSDARG00000101479	BX908782.2	0.0224878	-1.35536
deseq2-22_7000001_13000000	AB_hom_vs_Tu_hom	ENSDARG00000112931	ndufaf3	0.0282726	0.337526
deseq2-22_7000001_13000000	AB_hom_vs_Tu_hom	ENSDARG00000037892	psmc3ip	0.028496	-0.407001
deseq2-22_7000001_13000000	AB_hom_vs_Tu_hom	ENSDARG00000089399	tmem176l.2	0.0299996	-0.593017
deseq2-22_7000001_13000000	AB_hom_vs_Tu_hom	ENSDARG00000111659	BX322657.2	0.0299996	-0.360229
deseq2-22_7000001_13000000	AB_hom_vs_Tu_hom	ENSDARG00000021186	si:dkeyp-4h4.1	0.0299996	-0.489475
deseq2-22_7000001_13000000	AB_hom_vs_Tu_hom	ENSDARG00000071790	znf1153	0.0299996	-0.404655
deseq2-22_7000001_13000000	AB_hom_vs_Tu_hom	ENSDARG00000090193	si:ch73-286h23.4	0.0310745	1.5875
deseq2-22_7000001_13000000	AB_hom_vs_Tu_hom	ENSDARG00000088198	CABZ01077220.1	0.0311718	2.1514
deseq2-22_7000001_13000000	AB_hom_vs_Tu_hom	ENSDARG00000056029	cyp26c1	0.0311718	0.326818
deseq2-22_7000001_13000000	AB_hom_vs_Tu_hom	ENSDARG00000011961	csrp2	0.0313741	0.185644
deseq2-22_7000001_13000000	AB_hom_vs_Tu_hom	ENSDARG00000077263	si:ch73-27e22.3	0.0349639	0.6924
deseq2-22_7000001_13000000	AB_hom_vs_Tu_hom	ENSDARG00000044132	ogna	0.0349639	-0.261439
deseq2-22_7000001_13000000	AB_hom_vs_Tu_hom	ENSDARG00000101600	BX640576.1	0.0355381	-1.98427
deseq2-22_7000001_13000000	AB_hom_vs_Tu_hom	ENSDARG00000077253	alkbh6	0.0430051	-0.346292
deseq2-22_7000001_13000000	AB_hom_vs_Tu_hom	ENSDARG00000093574	si:ch73-256j6.4	0.0433121	1.49405
deseq2-22_7000001_13000000	AB_hom_vs_Tu_hom	ENSDARG00000012381	hsc70	0.0433321	-0.215869
deseq2-22_7000001_13000000	AB_hom_vs_Tu_hom	ENSDARG00000038424	c4b	0.0441729	-1.03876
deseq2-22_7000001_13000000	AB_hom_vs_Tu_hom	ENSDARG00000100449	BX322631.1	0.0452149	0.534346
deseq2-22_7000001_13000000	AB_hom_vs_Tu_hom	ENSDARG00000114451	mmp13a	0.0466237	-0.894058
deseq2-22_7000001_13000000	AB_hom_vs_Tu_hom	ENSDARG00000086027	si:ch211-168d23.3	0.0466237	0.26389
deseq2-22_7000001_13000000	AB_hom_vs_Tu_hom	ENSDARG00000093600	omd	0.0488722	-0.473609
deseq2-22_7000001_13000000	AB_hom_vs_Tu_hom	ENSDARG00000117571	BX927329.2	0.0491943	-2.1691
deseq2-22_7000001_13000000	AB_Tu_het_vs_Tu_hom	ENSDARG00000093024	si:ch211-213a13.2	2.37895e-43	1.44648
deseq2-22_7000001_13000000	AB_Tu_het_vs_Tu_hom	ENSDARG00000090600	si:ch211-213a13.1	2.09582e-42	-0.716016
deseq2-22_7000001_13000000	AB_Tu_het_vs_Tu_hom	ENSDARG00000074546	si:ch211-213a13.2	3.36912e-40	0.71955
deseq2-22_7000001_13000000	AB_Tu_het_vs_Tu_hom	ENSDARG00000099006	CABZ01029938.1	2.12711e-35	4.05914
deseq2-22_7000001_13000000	AB_Tu_het_vs_Tu_hom	ENSDARG00000013022	si:ch211-59h6.1	1.14643e-32	-0.928176
deseq2-22_7000001_13000000	AB_Tu_het_vs_Tu_hom	ENSDARG00000104640	BX511034.7	2.1088e-31	-0.972185
deseq2-22_7000001_13000000	AB_Tu_het_vs_Tu_hom	ENSDARG00000099511	CABZ01034698.2	5.81661e-30	3.91172
deseq2-22_7000001_13000000	AB_Tu_het_vs_Tu_hom	ENSDARG00000077058	cela1.5	1.2998e-28	3.7812
deseq2-22_7000001_13000000	AB_Tu_het_vs_Tu_hom	ENSDARG00000040640	si:ch73-44m9.3	3.29289e-28	4.01808
deseq2-22_7000001_13000000	AB_Tu_het_vs_Tu_hom	ENSDARG00000109202	BX324216.3	7.93374e-28	-0.640292
deseq2-22_7000001_13000000	AB_Tu_het_vs_Tu_hom	ENSDARG00000093402	si:dkey-286j17.4	2.36808e-27	-0.843219
deseq2-22_7000001_13000000	AB_Tu_het_vs_Tu_hom	ENSDARG00000077115	si:ch73-44m9.1	1.02784e-23	4.21543
deseq2-22_7000001_13000000	AB_Tu_het_vs_Tu_hom	ENSDARG00000109368	si:dkey-182g1.2	1.94724e-23	3.88225
deseq2-22_7000001_13000000	AB_Tu_het_vs_Tu_hom	ENSDARG00000074844	CABZ01061495.1	1.12232e-22	-0.504195
deseq2-22_7000001_13000000	AB_Tu_het_vs_Tu_hom	ENSDARG00000071629	BX511034.1	1.29666e-22	-0.919151
deseq2-22_7000001_13000000	AB_Tu_het_vs_Tu_hom	ENSDARG00000092890	si:ch73-44m9.5	9.71716e-20	3.94392
deseq2-22_7000001_13000000	AB_Tu_het_vs_Tu_hom	ENSDARG00000079645	sc:d217	1.55274e-17	3.58577
deseq2-22_7000001_13000000	AB_Tu_het_vs_Tu_hom	ENSDARG00000004840	rassf1	2.49349e-17	-0.288582
deseq2-22_7000001_13000000	AB_Tu_het_vs_Tu_hom	ENSDARG00000058537	si:dkey-102c8.2	4.98389e-17	3.97441
deseq2-22_7000001_13000000	AB_Tu_het_vs_Tu_hom	ENSDARG00000071590	si:ch211-236g6.1	1.20451e-16	-0.909667
deseq2-22_7000001_13000000	AB_Tu_het_vs_Tu_hom	ENSDARG00000077068	si:ch211-11p18.6	1.84784e-16	-0.772757
deseq2-22_7000001_13000000	AB_Tu_het_vs_Tu_hom	ENSDARG00000095643	si:dkey-253d23.3	6.33476e-13	-0.357522
deseq2-22_7000001_13000000	AB_Tu_het_vs_Tu_hom	ENSDARG00000098740	CABZ01046427.2	1.98242e-12	3.61522
deseq2-22_7000001_13000000	AB_Tu_het_vs_Tu_hom	ENSDARG00000111423	si:ch73-27e22.1	8.55495e-12	2.90379
deseq2-22_7000001_13000000	AB_Tu_het_vs_Tu_hom	ENSDARG00000093964	si:ch211-250k18.6	1.00681e-11	0.837996
deseq2-22_7000001_13000000	AB_Tu_het_vs_Tu_hom	ENSDARG00000095147	krt96	1.16135e-11	0.897162
deseq2-22_7000001_13000000	AB_Tu_het_vs_Tu_hom	ENSDARG00000043168	cela1.5	3.26349e-11	-0.954546
deseq2-22_7000001_13000000	AB_Tu_het_vs_Tu_hom	ENSDARG00000043173	cela1.3	1.79643e-10	-1.01135
deseq2-22_7000001_13000000	AB_Tu_het_vs_Tu_hom	ENSDARG00000099023	CABZ01034698.1	1.79643e-10	2.96483
deseq2-22_7000001_13000000	AB_Tu_het_vs_Tu_hom	ENSDARG00000116618	si:ch73-27e22.8	4.49533e-10	-0.978357
deseq2-22_7000001_13000000	AB_Tu_het_vs_Tu_hom	ENSDARG00000071588	BX539307.1	5.57211e-10	3.26565
deseq2-22_7000001_13000000	AB_Tu_het_vs_Tu_hom	ENSDARG00000092266	si:ch73-27e22.2	4.31997e-08	2.98202
deseq2-22_7000001_13000000	AB_Tu_het_vs_Tu_hom	ENSDARG00000116833	CABZ01077220.2	8.063e-08	0.482755
deseq2-22_7000001_13000000	AB_Tu_het_vs_Tu_hom	ENSDARG00000099364	BX511034.5	1.53457e-07	-0.748788
deseq2-22_7000001_13000000	AB_Tu_het_vs_Tu_hom	ENSDARG00000043131	BX664625.1	2.98701e-07	-0.861487
deseq2-22_7000001_13000000	AB_Tu_het_vs_Tu_hom	ENSDARG00000111515	CABZ01061498.1	3.86555e-07	-0.71896
deseq2-22_7000001_13000000	AB_Tu_het_vs_Tu_hom	ENSDARG00000079325	CABZ01046432.1	6.84054e-07	2.7714
deseq2-22_7000001_13000000	AB_Tu_het_vs_Tu_hom	ENSDARG00000093761	si:ch211-250k18.7	1.96232e-06	1.34823
deseq2-22_7000001_13000000	AB_Tu_het_vs_Tu_hom	ENSDARG00000087046	si:ch211-222k6.2	3.51853e-06	-0.48781
deseq2-22_7000001_13000000	AB_Tu_het_vs_Tu_hom	ENSDARG00000007421	ftcd	8.60359e-06	0.340641
deseq2-22_7000001_13000000	AB_Tu_het_vs_Tu_hom	ENSDARG00000008306	rdh5	8.8175e-06	-0.219514
deseq2-22_7000001_13000000	AB_Tu_het_vs_Tu_hom	ENSDARG00000108332	FO393424.1	1.62109e-05	-1.41288
deseq2-22_7000001_13000000	AB_Tu_het_vs_Tu_hom	ENSDARG00000075476	nlrp15	4.82331e-05	2.48157
deseq2-22_7000001_13000000	AB_Tu_het_vs_Tu_hom	ENSDARG00000095801	BX649485.2	5.5219e-05	-1.61498
deseq2-22_7000001_13000000	AB_Tu_het_vs_Tu_hom	ENSDARG00000095820	BX649485.4	6.4818e-05	-1.76807
deseq2-22_7000001_13000000	AB_Tu_het_vs_Tu_hom	ENSDARG00000058322	enc3	0.000123614	-0.164582
deseq2-22_7000001_13000000	AB_Tu_het_vs_Tu_hom	ENSDARG00000076965	cep70	0.000630144	-0.303982
deseq2-22_7000001_13000000	AB_Tu_het_vs_Tu_hom	ENSDARG00000071518	krt222	0.000976514	0.161694
deseq2-22_7000001_13000000	AB_Tu_het_vs_Tu_hom	ENSDARG00000087623	BX649485.1	0.000979867	-1.40599
deseq2-22_7000001_13000000	AB_Tu_het_vs_Tu_hom	ENSDARG00000029841	tmprss9	0.0011931	-0.257206
deseq2-22_7000001_13000000	AB_Tu_het_vs_Tu_hom	ENSDARG00000098837	tgm5l	0.00257092	-0.760862
deseq2-22_7000001_13000000	AB_Tu_het_vs_Tu_hom	ENSDARG00000043055	hiat1b	0.0026726	-0.134803
deseq2-22_7000001_13000000	AB_Tu_het_vs_Tu_hom	ENSDARG00000109109	FO393424.2	0.00365734	-0.889771
deseq2-22_7000001_13000000	AB_Tu_het_vs_Tu_hom	ENSDARG00000077415	zmp:0000001175	0.00384784	-0.585718
deseq2-22_7000001_13000000	AB_Tu_het_vs_Tu_hom	ENSDARG00000043171	cela1.4	0.00653353	-0.534214
deseq2-22_7000001_13000000	AB_Tu_het_vs_Tu_hom	ENSDARG00000103309	BX664625.4	0.00817271	2.1611
deseq2-22_7000001_13000000	AB_Tu_het_vs_Tu_hom	ENSDARG00000093345	si:ch73-27e22.7	0.0100254	2.02969
deseq2-22_7000001_13000000	AB_Tu_het_vs_Tu_hom	ENSDARG00000038242	zgc:113333	0.0113902	0.187807
deseq2-22_7000001_13000000	AB_Tu_het_vs_Tu_hom	ENSDARG00000113572	si:dkey-102c8.3	0.0138466	-0.251298
deseq2-22_7000001_13000000	AB_Tu_het_vs_Tu_hom	ENSDARG00000008735	atp6ap2	0.014148	-0.149173
deseq2-22_7000001_13000000	AB_Tu_het_vs_Tu_hom	ENSDARG00000011371	zgc:64106	0.0151691	-0.231951
deseq2-22_7000001_13000000	AB_Tu_het_vs_Tu_hom	ENSDARG00000116843	BX324216.4	0.0166851	-0.767636
deseq2-22_7000001_13000000	AB_Tu_het_vs_Tu_hom	ENSDARG00000036084	itln2	0.017255	-2.13923
deseq2-22_7000001_13000000	AB_Tu_het_vs_Tu_hom	ENSDARG00000032087	sgsh	0.0173856	0.238907
deseq2-22_7000001_13000000	AB_Tu_het_vs_Tu_hom	ENSDARG00000012789	plek2	0.0194101	-0.537097
deseq2-22_7000001_13000000	AB_Tu_het_vs_Tu_hom	ENSDARG00000068749	si:ch211-250k18.5	0.0198512	0.854596
deseq2-22_7000001_13000000	AB_Tu_het_vs_Tu_hom	ENSDARG00000024189	pnocb	0.0214198	-0.249126
deseq2-22_7000001_13000000	AB_Tu_het_vs_Tu_hom	ENSDARG00000013681	si:dkey-42i9.6	0.0214198	-0.106168
deseq2-22_7000001_13000000	AB_Tu_het_vs_Tu_hom	ENSDARG00000058566	si:dkey-253d23.5	0.0246241	0.288151
deseq2-22_7000001_13000000	AB_Tu_het_vs_Tu_hom	ENSDARG00000071012	ifit14	0.0267394	-1.60162
deseq2-22_7000001_13000000	AB_Tu_het_vs_Tu_hom	ENSDARG00000104142	si:dkey-15h8.10	0.0367741	-1.15822
deseq2-22_7000001_13000000	AB_Tu_het_vs_Tu_hom	ENSDARG00000095665	si:ch211-191a16.2	0.0376874	0.423554
deseq2-22_7000001_13000000	AB_Tu_het_vs_Tu_hom	ENSDARG00000042874	phlda2	0.0443417	-0.248422
deseq2-22_7000001_13000000	AB_Tu_het_vs_Tu_hom	ENSDARG00000114451	mmp13a	0.0496273	-0.794094
deseq2-22_7000001_13000000	AB_Tu_het_vs_Tu_hom	ENSDARG00000104773	junbb	0.0496273	-0.339581
deseq2-22_7000001_13000000	AB_Tu_het_vs_Tu_hom	ENSDARG00000094747	si:ch211-197g15.6	0.0496273	-0.801167
deseq2-5_59000001_64000000	AB_Tu_het_vs_AB_hom	ENSDARG00000098537	spata22	8.38299e-44	3.13044
deseq2-5_59000001_64000000	AB_Tu_het_vs_AB_hom	ENSDARG00000088069	CR759879.1	2.22504e-16	-0.894463
deseq2-5_59000001_64000000	AB_Tu_het_vs_AB_hom	ENSDARG00000088492	cntrl	1.06369e-09	0.415228
deseq2-5_59000001_64000000	AB_Tu_het_vs_AB_hom	ENSDARG00000090830	tmem132e	1.06369e-09	0.184141
deseq2-5_59000001_64000000	AB_Tu_het_vs_AB_hom	ENSDARG00000029480	specc1	3.12243e-07	0.265445
deseq2-5_59000001_64000000	AB_Tu_het_vs_AB_hom	ENSDARG00000111249	CR394528.1	4.57959e-07	0.438088
deseq2-5_59000001_64000000	AB_Tu_het_vs_AB_hom	ENSDARG00000045262	gsnb	1.22138e-06	0.526871
deseq2-5_59000001_64000000	AB_Tu_het_vs_AB_hom	ENSDARG00000101133	BX510960.1	1.51819e-06	-0.889214
deseq2-5_59000001_64000000	AB_Tu_het_vs_AB_hom	ENSDARG00000059583	rcc1l	3.62762e-06	-0.23081
deseq2-5_59000001_64000000	AB_Tu_het_vs_AB_hom	ENSDARG00000067606	rsph4a	5.59691e-06	0.517033
deseq2-5_59000001_64000000	AB_Tu_het_vs_AB_hom	ENSDARG00000108939	FQ378016.1	1.60102e-05	0.947858
deseq2-5_59000001_64000000	AB_Tu_het_vs_AB_hom	ENSDARG00000094214	si:dkeyp-117b8.4	7.61155e-05	0.1812
deseq2-5_59000001_64000000	AB_Tu_het_vs_AB_hom	ENSDARG00000067605	napaa	0.000263252	0.170321
deseq2-5_59000001_64000000	AB_Tu_het_vs_AB_hom	ENSDARG00000035151	drll.1	0.000289829	0.965241
deseq2-5_59000001_64000000	AB_Tu_het_vs_AB_hom	ENSDARG00000114187	BX927212.1	0.000815628	0.896704
deseq2-5_59000001_64000000	AB_Tu_het_vs_AB_hom	ENSDARG00000095635	drll.3	0.00366749	-1.29945
deseq2-5_59000001_64000000	AB_Tu_het_vs_AB_hom	ENSDARG00000052247	alkbh4	0.00466136	-0.293867
deseq2-5_59000001_64000000	AB_Tu_het_vs_AB_hom	ENSDARG00000059606	ccdc84	0.0175067	0.246391
deseq2-5_59000001_64000000	AB_Tu_het_vs_AB_hom	ENSDARG00000115549	NCEH1	0.0310518	0.633535
deseq2-5_59000001_64000000	AB_hom_vs_Tu_hom	ENSDARG00000098537	spata22	2.68153e-74	-3.99466
deseq2-5_59000001_64000000	AB_hom_vs_Tu_hom	ENSDARG00000088069	CR759879.1	1.14944e-69	7.42262
deseq2-5_59000001_64000000	AB_hom_vs_Tu_hom	ENSDARG00000101133	BX510960.1	3.68522e-38	5.63194
deseq2-5_59000001_64000000	AB_hom_vs_Tu_hom	ENSDARG00000111249	CR394528.1	1.34028e-34	-0.897636
deseq2-5_59000001_64000000	AB_hom_vs_Tu_hom	ENSDARG00000090830	tmem132e	4.92338e-33	-0.336903
deseq2-5_59000001_64000000	AB_hom_vs_Tu_hom	ENSDARG00000088492	cntrl	9.25961e-31	-0.725102
deseq2-5_59000001_64000000	AB_hom_vs_Tu_hom	ENSDARG00000059583	rcc1l	3.41723e-28	0.492668
deseq2-5_59000001_64000000	AB_hom_vs_Tu_hom	ENSDARG00000035151	drll.1	1.62359e-18	-1.78694
deseq2-5_59000001_64000000	AB_hom_vs_Tu_hom	ENSDARG00000029480	specc1	1.47093e-17	-0.405814
deseq2-5_59000001_64000000	AB_hom_vs_Tu_hom	ENSDARG00000045262	gsnb	3.98335e-17	-0.836699
deseq2-5_59000001_64000000	AB_hom_vs_Tu_hom	ENSDARG00000114187	BX927212.1	2.56228e-16	-1.6205
deseq2-5_59000001_64000000	AB_hom_vs_Tu_hom	ENSDARG00000067606	rsph4a	1.2642e-15	-0.795693
deseq2-5_59000001_64000000	AB_hom_vs_Tu_hom	ENSDARG00000108939	FQ378016.1	2.13077e-13	-1.45519
deseq2-5_59000001_64000000	AB_hom_vs_Tu_hom	ENSDARG00000095635	drll.3	3.43976e-13	3.65979
deseq2-5_59000001_64000000	AB_hom_vs_Tu_hom	ENSDARG00000052247	alkbh4	7.12163e-13	0.575577
deseq2-5_59000001_64000000	AB_hom_vs_Tu_hom	ENSDARG00000067605	napaa	2.88005e-12	-0.272725
deseq2-5_59000001_64000000	AB_hom_vs_Tu_hom	ENSDARG00000110503	BX510960.2	9.53912e-12	3.44833
deseq2-5_59000001_64000000	AB_hom_vs_Tu_hom	ENSDARG00000026400	rad51d	4.36069e-08	-0.772946
deseq2-5_59000001_64000000	AB_hom_vs_Tu_hom	ENSDARG00000094214	si:dkeyp-117b8.4	1.9604e-07	-0.225055
deseq2-5_59000001_64000000	AB_hom_vs_Tu_hom	ENSDARG00000018825	tmem248	1.36525e-06	-0.333144
deseq2-5_59000001_64000000	AB_hom_vs_Tu_hom	ENSDARG00000059606	ccdc84	1.39001e-06	-0.366337
deseq2-5_59000001_64000000	AB_hom_vs_Tu_hom	ENSDARG00000110147	zgc:85789	2.7169e-06	-0.381094
deseq2-5_59000001_64000000	AB_hom_vs_Tu_hom	ENSDARG00000102641	CR925761.3	1.72683e-05	0.842508
deseq2-5_59000001_64000000	AB_hom_vs_Tu_hom	ENSDARG00000019525	tbcelb	8.0965e-05	-0.387901
deseq2-5_59000001_64000000	AB_hom_vs_Tu_hom	ENSDARG00000035132	rgs3b	8.0965e-05	-0.299282
deseq2-5_59000001_64000000	AB_hom_vs_Tu_hom	ENSDARG00000035152	ap2b1	0.000132778	0.0799271
deseq2-5_59000001_64000000	AB_hom_vs_Tu_hom	ENSDARG00000094587	si:dkey-35m8.1	0.000169916	-0.33045
deseq2-5_59000001_64000000	AB_hom_vs_Tu_hom	ENSDARG00000007791	ppp2r1ba	0.000184696	0.125396
deseq2-5_59000001_64000000	AB_hom_vs_Tu_hom	ENSDARG00000052450	hspb2	0.00131809	0.321708
deseq2-5_59000001_64000000	AB_hom_vs_Tu_hom	ENSDARG00000081800	CU929237.1	0.00302063	0.507285
deseq2-5_59000001_64000000	AB_hom_vs_Tu_hom	ENSDARG00000035148	orai2	0.0117134	0.466229
deseq2-5_59000001_64000000	AB_hom_vs_Tu_hom	ENSDARG00000009939	micu2	0.0170739	-0.212061
deseq2-5_59000001_64000000	AB_hom_vs_Tu_hom	ENSDARG00000095142	si:ch211-208h16.4	0.0220536	-0.458273
deseq2-5_59000001_64000000	AB_hom_vs_Tu_hom	ENSDARG00000076483	dhrs13b.2	0.0309472	1.39658
deseq2-5_59000001_64000000	AB_hom_vs_Tu_hom	ENSDARG00000035398	enc1	0.0449252	0.160596
deseq2-5_59000001_64000000	AB_Tu_het_vs_Tu_hom	ENSDARG00000088069	CR759879.1	1.56591e-52	6.52815
deseq2-5_59000001_64000000	AB_Tu_het_vs_Tu_hom	ENSDARG00000101133	BX510960.1	1.85616e-25	4.74272
deseq2-5_59000001_64000000	AB_Tu_het_vs_Tu_hom	ENSDARG00000098537	spata22	2.61112e-12	-0.86422
deseq2-5_59000001_64000000	AB_Tu_het_vs_Tu_hom	ENSDARG00000111249	CR394528.1	2.90953e-08	-0.459548
deseq2-5_59000001_64000000	AB_Tu_het_vs_Tu_hom	ENSDARG00000059583	rcc1l	4.78116e-06	0.261858
deseq2-5_59000001_64000000	AB_Tu_het_vs_Tu_hom	ENSDARG00000090830	tmem132e	3.41264e-05	-0.152762
deseq2-5_59000001_64000000	AB_Tu_het_vs_Tu_hom	ENSDARG00000088492	cntrl	0.000375952	-0.309874
deseq2-5_59000001_64000000	AB_Tu_het_vs_Tu_hom	ENSDARG00000110503	BX510960.2	0.00175387	2.35088
deseq2-5_59000001_64000000	AB_Tu_het_vs_Tu_hom	ENSDARG00000095635	drll.3	0.00175387	2.36033
deseq2-5_59000001_64000000	AB_Tu_het_vs_Tu_hom	ENSDARG00000035151	drll.1	0.00287195	-0.821701
deseq2-5_59000001_64000000	AB_Tu_het_vs_Tu_hom	ENSDARG00000114187	BX927212.1	0.0183436	-0.723801
deseq2-12_44000001_48000000	AB_Tu_het_vs_AB_hom	ENSDARG00000089369	fdxr	2.15106e-33	0.695028
deseq2-12_44000001_48000000	AB_Tu_het_vs_AB_hom	ENSDARG00000095409	si:ch211-226h7.8	2.01571e-24	2.6088
deseq2-12_44000001_48000000	AB_Tu_het_vs_AB_hom	ENSDARG00000099933	ppa1a	2.08251e-24	0.853184
deseq2-12_44000001_48000000	AB_Tu_het_vs_AB_hom	ENSDARG00000105570	crestin	1.41704e-20	3.47817
deseq2-12_44000001_48000000	AB_Tu_het_vs_AB_hom	ENSDARG00000117808	CABZ01068366.1	1.21995e-17	-0.831011
deseq2-12_44000001_48000000	AB_Tu_het_vs_AB_hom	ENSDARG00000109276	CABZ01068367.1	5.76305e-17	0.396337
deseq2-12_44000001_48000000	AB_Tu_het_vs_AB_hom	ENSDARG00000102793	slc16a6a	2.34481e-16	0.788039
deseq2-12_44000001_48000000	AB_Tu_het_vs_AB_hom	ENSDARG00000096700	FP565451.1	3.56992e-15	-1.98899
deseq2-12_44000001_48000000	AB_Tu_het_vs_AB_hom	ENSDARG00000062442	msrb1b	4.09777e-14	-1.35297
deseq2-12_44000001_48000000	AB_Tu_het_vs_AB_hom	ENSDARG00000101010	hpdl	7.34614e-14	1.02321
deseq2-12_44000001_48000000	AB_Tu_het_vs_AB_hom	ENSDARG00000075046	rnf151	7.60252e-14	-0.88549
deseq2-12_44000001_48000000	AB_Tu_het_vs_AB_hom	ENSDARG00000033537	p4ha1a	3.16248e-13	0.483812
deseq2-12_44000001_48000000	AB_Tu_het_vs_AB_hom	ENSDARG00000076196	si:ch211-226h7.6	7.02616e-13	2.3594
deseq2-12_44000001_48000000	AB_Tu_het_vs_AB_hom	ENSDARG00000045153	slc16a8	2.40024e-11	-0.764366
deseq2-12_44000001_48000000	AB_Tu_het_vs_AB_hom	ENSDARG00000055642	si:ch211-217a12.1	2.40686e-11	-0.550078
deseq2-12_44000001_48000000	AB_Tu_het_vs_AB_hom	ENSDARG00000104531	zcchc4	2.09769e-10	-0.40716
deseq2-12_44000001_48000000	AB_Tu_het_vs_AB_hom	ENSDARG00000055128	armc4	2.09769e-10	-0.482085
deseq2-12_44000001_48000000	AB_Tu_het_vs_AB_hom	ENSDARG00000101715	arsg	4.53051e-09	-0.777153
deseq2-12_44000001_48000000	AB_Tu_het_vs_AB_hom	ENSDARG00000096687	rgs7b	1.53144e-07	0.289983
deseq2-12_44000001_48000000	AB_Tu_het_vs_AB_hom	ENSDARG00000062943	taco1	1.71082e-07	-0.683074
deseq2-12_44000001_48000000	AB_Tu_het_vs_AB_hom	ENSDARG00000075340	med1	5.17244e-07	-0.210118
deseq2-12_44000001_48000000	AB_Tu_het_vs_AB_hom	ENSDARG00000055291	rab18a	6.0457e-07	0.201195
deseq2-12_44000001_48000000	AB_Tu_het_vs_AB_hom	ENSDARG00000100072	mgrn1a	3.09039e-06	0.192614
deseq2-12_44000001_48000000	AB_Tu_het_vs_AB_hom	ENSDARG00000100552	taco1	1.17817e-05	0.280659
deseq2-12_44000001_48000000	AB_Tu_het_vs_AB_hom	ENSDARG00000113809	RF00001	1.4327e-05	-1.01344
deseq2-12_44000001_48000000	AB_Tu_het_vs_AB_hom	ENSDARG00000079128	becn1	3.07377e-05	-0.159158
deseq2-12_44000001_48000000	AB_Tu_het_vs_AB_hom	ENSDARG00000056079	l3mbtl2	4.0734e-05	0.179945
deseq2-12_44000001_48000000	AB_Tu_het_vs_AB_hom	ENSDARG00000045064	ablim1b	5.39397e-05	-0.153942
deseq2-12_44000001_48000000	AB_Tu_het_vs_AB_hom	ENSDARG00000055569	ghdc	8.84186e-05	-0.342174
deseq2-12_44000001_48000000	AB_Tu_het_vs_AB_hom	ENSDARG00000095300	mxra7	8.94249e-05	-0.267651
deseq2-12_44000001_48000000	AB_Tu_het_vs_AB_hom	ENSDARG00000074169	gpam	0.000102076	0.213685
deseq2-12_44000001_48000000	AB_Tu_het_vs_AB_hom	ENSDARG00000076980	ppp1r16a	0.000149575	-0.328998
deseq2-12_44000001_48000000	AB_Tu_het_vs_AB_hom	ENSDARG00000090537	ifit11	0.000152493	-1.74122
deseq2-12_44000001_48000000	AB_Tu_het_vs_AB_hom	ENSDARG00000111997	npffr1	0.000240025	-0.287807
deseq2-12_44000001_48000000	AB_Tu_het_vs_AB_hom	ENSDARG00000094504	plekha1b	0.000466394	0.315446
deseq2-12_44000001_48000000	AB_Tu_het_vs_AB_hom	ENSDARG00000027070	acbd4	0.000471506	-0.318637
deseq2-12_44000001_48000000	AB_Tu_het_vs_AB_hom	ENSDARG00000076015	si:ch73-139e5.2	0.000577127	0.497045
deseq2-12_44000001_48000000	AB_Tu_het_vs_AB_hom	ENSDARG00000045268	tectb	0.000863686	0.353163
deseq2-12_44000001_48000000	AB_Tu_het_vs_AB_hom	ENSDARG00000055652	aclyb	0.00100757	0.237504
deseq2-12_44000001_48000000	AB_Tu_het_vs_AB_hom	ENSDARG00000058076	snf8	0.00109037	-0.157582
deseq2-12_44000001_48000000	AB_Tu_het_vs_AB_hom	ENSDARG00000091768	dclre1a	0.00129161	0.274104
deseq2-12_44000001_48000000	AB_Tu_het_vs_AB_hom	ENSDARG00000103261	CABZ01038699.1	0.00135208	0.761279
deseq2-12_44000001_48000000	AB_Tu_het_vs_AB_hom	ENSDARG00000074160	paqr4b	0.00135208	-0.413864
deseq2-12_44000001_48000000	AB_Tu_het_vs_AB_hom	ENSDARG00000101969	CABZ01084347.1	0.00165095	0.534265
deseq2-12_44000001_48000000	AB_Tu_het_vs_AB_hom	ENSDARG00000109626	si:ch211-226h7.3	0.00291397	-0.648418
deseq2-12_44000001_48000000	AB_Tu_het_vs_AB_hom	ENSDARG00000020041	vps35l	0.00403411	0.118967
deseq2-12_44000001_48000000	AB_Tu_het_vs_AB_hom	ENSDARG00000026840	arhgap23b	0.00479456	0.21895
deseq2-12_44000001_48000000	AB_Tu_het_vs_AB_hom	ENSDARG00000095603	grid2ipb	0.00485578	-0.141595
deseq2-12_44000001_48000000	AB_Tu_het_vs_AB_hom	ENSDARG00000091535	ccser2b	0.0057491	-0.328746
deseq2-12_44000001_48000000	AB_Tu_het_vs_AB_hom	ENSDARG00000002298	ankrd22	0.0108559	-0.296398
deseq2-12_44000001_48000000	AB_Tu_het_vs_AB_hom	ENSDARG00000087059	selenou1b	0.0141798	-0.232719
deseq2-12_44000001_48000000	AB_Tu_het_vs_AB_hom	ENSDARG00000104629	SLC16A6 (1 of many)	0.0224576	-2.5707
deseq2-12_44000001_48000000	AB_Tu_het_vs_AB_hom	ENSDARG00000040712	adprh	0.0283254	0.234915
deseq2-12_44000001_48000000	AB_Tu_het_vs_AB_hom	ENSDARG00000057060	tvp23b	0.0312339	-0.124802
deseq2-12_44000001_48000000	AB_Tu_het_vs_AB_hom	ENSDARG00000077900	si:ch211-141o9.10	0.0328406	-0.442014
deseq2-12_44000001_48000000	AB_Tu_het_vs_AB_hom	ENSDARG00000061990	kcnh4b	0.03931	0.185382
deseq2-12_44000001_48000000	AB_Tu_het_vs_AB_hom	ENSDARG00000041998	zgc:113337	0.0480427	0.227059
deseq2-12_44000001_48000000	AB_Tu_het_vs_AB_hom	ENSDARG00000098856	RYR2 (1 of many)	0.0489004	0.118059
deseq2-12_44000001_48000000	AB_Tu_het_vs_AB_hom	ENSDARG00000052626	AL954655.1	0.0493169	1.3931
deseq2-3_7000001_13000000	AB_Tu_het_vs_AB_hom	ENSDARG00000074752	hlfa	4.09524e-13	-0.492378
deseq2-3_7000001_13000000	AB_Tu_het_vs_AB_hom	ENSDARG00000086654	cbln11	0.00710799	-1.11577
deseq2-3_7000001_13000000	AB_hom_vs_Tu_hom	ENSDARG00000074752	hlfa	3.12514e-53	1.01885
deseq2-3_7000001_13000000	AB_hom_vs_Tu_hom	ENSDARG00000040387	mmd	6.14482e-07	-0.500925
deseq2-3_7000001_13000000	AB_hom_vs_Tu_hom	ENSDARG00000098923	zgc:173577	2.95354e-06	-1.7471
deseq2-3_7000001_13000000	AB_hom_vs_Tu_hom	ENSDARG00000111323	si:ch211-51i16.1	2.95354e-06	-1.73103
deseq2-3_7000001_13000000	AB_hom_vs_Tu_hom	ENSDARG00000104985	zgc:110249	6.404e-06	-1.00881
deseq2-3_7000001_13000000	AB_hom_vs_Tu_hom	ENSDARG00000099684	trim35-24	1.05237e-05	-1.82527
deseq2-3_7000001_13000000	AB_hom_vs_Tu_hom	ENSDARG00000101055	trim35-25	0.000494238	-1.79362
deseq2-3_7000001_13000000	AB_hom_vs_Tu_hom	ENSDARG00000092233	vtg1	0.00115426	-4.77091
deseq2-3_7000001_13000000	AB_hom_vs_Tu_hom	ENSDARG00000039309	hook2	0.00173596	0.639102
deseq2-3_7000001_13000000	AB_hom_vs_Tu_hom	ENSDARG00000041490	afp4	0.00297035	-3.39623
deseq2-3_7000001_13000000	AB_hom_vs_Tu_hom	ENSDARG00000114964	pimr80	0.0163242	0.962524
deseq2-3_7000001_13000000	AB_hom_vs_Tu_hom	ENSDARG00000078442	AL954696.1	0.0355769	0.362948
deseq2-3_7000001_13000000	AB_Tu_het_vs_Tu_hom	ENSDARG00000074752	hlfa	2.54485e-20	0.526469
deseq2-3_7000001_13000000	AB_Tu_het_vs_Tu_hom	ENSDARG00000041490	afp4	0.002192	-2.76796
deseq2-3_7000001_13000000	AB_Tu_het_vs_Tu_hom	ENSDARG00000092233	vtg1	0.0152778	-3.31892
deseq2-3_7000001_13000000	AB_Tu_het_vs_Tu_hom	ENSDARG00000098923	zgc:173577	0.0175532	-0.833629
deseq2-14_10000001_13000000	AB_Tu_het_vs_AB_hom	ENSDARG00000100366	si:dkey-102m7.3	2.25614e-16	-0.38709
deseq2-14_10000001_13000000	AB_Tu_het_vs_AB_hom	ENSDARG00000071871	glod5	2.31763e-15	0.533281
deseq2-14_10000001_13000000	AB_Tu_het_vs_AB_hom	ENSDARG00000104572	si:dkey-35h6.1	8.91712e-11	-1.12243
deseq2-14_10000001_13000000	AB_Tu_het_vs_AB_hom	ENSDARG00000098293	si:dkey-27i16.2	2.19836e-08	0.526891
deseq2-14_10000001_13000000	AB_Tu_het_vs_AB_hom	ENSDARG00000003035	hspa9	9.35721e-07	0.153398
deseq2-14_10000001_13000000	AB_Tu_het_vs_AB_hom	ENSDARG00000099315	nsdhl	0.00834411	0.367514
deseq2-14_10000001_13000000	AB_Tu_het_vs_AB_hom	ENSDARG00000103053	CR383680.2	0.0230252	1.8277
deseq2-9_41000001_47000000	AB_Tu_het_vs_AB_hom	ENSDARG00000078415	lrrc3	0.00679511	-0.613748
deseq2-9_41000001_47000000	AB_Tu_het_vs_AB_hom	ENSDARG00000101367	si:ch73-193i22.1	0.00679511	0.363823
deseq2-9_41000001_47000000	AB_Tu_het_vs_AB_hom	ENSDARG00000092404	si:dkey-79p17.3	0.00679511	0.820473
deseq2-9_41000001_47000000	AB_Tu_het_vs_AB_hom	ENSDARG00000062549	acmsd	0.00796178	-0.329367
deseq2-9_41000001_47000000	AB_Tu_het_vs_AB_hom	ENSDARG00000079703	si:dkey-18p12.4	0.00796178	-0.565182
deseq2-9_41000001_47000000	AB_Tu_het_vs_AB_hom	ENSDARG00000076321	col28a2a	0.00796178	0.945751
deseq2-9_41000001_47000000	AB_Tu_het_vs_AB_hom	ENSDARG00000020573	ddx3xa	0.0430369	0.0870548
deseq2-9_41000001_47000000	AB_hom_vs_Tu_hom	ENSDARG00000078415	lrrc3	4.13354e-13	1.41186
deseq2-9_41000001_47000000	AB_hom_vs_Tu_hom	ENSDARG00000040614	sestd1	3.38396e-08	0.230739
deseq2-9_41000001_47000000	AB_hom_vs_Tu_hom	ENSDARG00000079703	si:dkey-18p12.4	3.38396e-08	0.98983
deseq2-9_41000001_47000000	AB_hom_vs_Tu_hom	ENSDARG00000092404	si:dkey-79p17.3	2.7517e-07	-1.29178
deseq2-9_41000001_47000000	AB_hom_vs_Tu_hom	ENSDARG00000101367	si:ch73-193i22.1	2.7517e-07	-0.556935
deseq2-9_41000001_47000000	AB_hom_vs_Tu_hom	ENSDARG00000094821	si:ch73-44m9.2	8.15914e-07	3.48557
deseq2-9_41000001_47000000	AB_hom_vs_Tu_hom	ENSDARG00000055159	cyp27a1.4	3.2574e-06	0.714447
deseq2-9_41000001_47000000	AB_hom_vs_Tu_hom	ENSDARG00000040910	ildr1b	1.38082e-05	0.392411
deseq2-9_41000001_47000000	AB_hom_vs_Tu_hom	ENSDARG00000002305	me3	1.38082e-05	0.215302
deseq2-9_41000001_47000000	AB_hom_vs_Tu_hom	ENSDARG00000041998	zgc:113337	2.27759e-05	-0.447846
deseq2-9_41000001_47000000	AB_hom_vs_Tu_hom	ENSDARG00000031678	col5a2a	2.28766e-05	0.319369
deseq2-9_41000001_47000000	AB_hom_vs_Tu_hom	ENSDARG00000063212	prmt2	4.36216e-05	0.811973
deseq2-9_41000001_47000000	AB_hom_vs_Tu_hom	ENSDARG00000104105	ttf2	4.55119e-05	-0.845473
deseq2-9_41000001_47000000	AB_hom_vs_Tu_hom	ENSDARG00000061062	nemp2	0.000128225	-0.286346
deseq2-9_41000001_47000000	AB_hom_vs_Tu_hom	ENSDARG00000076321	col28a2a	0.000179446	-1.24985
deseq2-9_41000001_47000000	AB_hom_vs_Tu_hom	ENSDARG00000095475	BX649377.1	0.000249787	-1.0413
deseq2-9_41000001_47000000	AB_hom_vs_Tu_hom	ENSDARG00000069186	cyp27a1.2	0.000271484	-0.975311
deseq2-9_41000001_47000000	AB_hom_vs_Tu_hom	ENSDARG00000095301	BX247868.1	0.000292571	0.45418
deseq2-9_41000001_47000000	AB_hom_vs_Tu_hom	ENSDARG00000062045	il1rapl1a	0.000308007	0.196857
deseq2-9_41000001_47000000	AB_hom_vs_Tu_hom	ENSDARG00000060875	pde1a	0.000556369	0.389749
deseq2-9_41000001_47000000	AB_hom_vs_Tu_hom	ENSDARG00000060671	lct	0.000663561	-0.703218
deseq2-9_41000001_47000000	AB_hom_vs_Tu_hom	ENSDARG00000094518	si:ch211-125e6.8	0.000663561	0.884412
deseq2-9_41000001_47000000	AB_hom_vs_Tu_hom	ENSDARG00000060682	agr1	0.000957117	0.408507
deseq2-9_41000001_47000000	AB_hom_vs_Tu_hom	ENSDARG00000013708	usp9	0.00205772	0.116482
deseq2-9_41000001_47000000	AB_hom_vs_Tu_hom	ENSDARG00000090844	CABZ01054965.1	0.00542134	-0.751274
deseq2-9_41000001_47000000	AB_hom_vs_Tu_hom	ENSDARG00000020573	ddx3xa	0.00697342	-0.105503
deseq2-9_41000001_47000000	AB_hom_vs_Tu_hom	ENSDARG00000070155	tuba8l3	0.00697342	-0.444809
deseq2-9_41000001_47000000	AB_hom_vs_Tu_hom	ENSDARG00000092610	lamp1b	0.00697342	-0.272356
deseq2-9_41000001_47000000	AB_hom_vs_Tu_hom	ENSDARG00000086215	gpr156	0.011853	-0.525467
deseq2-9_41000001_47000000	AB_hom_vs_Tu_hom	ENSDARG00000095595	BX322575.1	0.011853	0.759883
deseq2-9_41000001_47000000	AB_hom_vs_Tu_hom	ENSDARG00000063375	pter	0.0145034	0.261646
deseq2-9_41000001_47000000	AB_hom_vs_Tu_hom	ENSDARG00000076733	bard1	0.0185931	-0.716341
deseq2-9_41000001_47000000	AB_hom_vs_Tu_hom	ENSDARG00000076122	si:ch211-160b11.4	0.0203857	1.25275
deseq2-9_41000001_47000000	AB_hom_vs_Tu_hom	ENSDARG00000074225	si:ch211-269e2.1	0.021893	-0.184373
deseq2-9_41000001_47000000	AB_hom_vs_Tu_hom	ENSDARG00000089190	tanc1b	0.021893	-0.393247
deseq2-9_41000001_47000000	AB_hom_vs_Tu_hom	ENSDARG00000088013	CYP27A1 (1 of many)	0.0226012	-0.697436
deseq2-9_41000001_47000000	AB_hom_vs_Tu_hom	ENSDARG00000006065	znf385b	0.0252808	-0.248661
deseq2-9_41000001_47000000	AB_hom_vs_Tu_hom	ENSDARG00000102265	smarcal1	0.0256288	-0.834071
deseq2-9_41000001_47000000	AB_hom_vs_Tu_hom	ENSDARG00000035562	mpdu1a	0.0256288	0.284625
deseq2-9_41000001_47000000	AB_hom_vs_Tu_hom	ENSDARG00000094466	si:ch73-199e17.1	0.033697	0.572372
deseq2-9_41000001_47000000	AB_hom_vs_Tu_hom	ENSDARG00000016059	rab5b	0.0345676	0.185817
deseq2-9_41000001_47000000	AB_hom_vs_Tu_hom	ENSDARG00000055388	vtna	0.0353096	0.322704
deseq2-9_41000001_47000000	AB_hom_vs_Tu_hom	ENSDARG00000086963	BX649442.1	0.0380306	-1.93936
deseq2-9_41000001_47000000	AB_hom_vs_Tu_hom	ENSDARG00000051912	hpxb	0.0388939	0.807426
deseq2-9_41000001_47000000	AB_hom_vs_Tu_hom	ENSDARG00000033227	lect2l	0.04018	0.897503
deseq2-9_41000001_47000000	AB_hom_vs_Tu_hom	ENSDARG00000026028	ankrd44	0.04018	0.328409
deseq2-9_41000001_47000000	AB_hom_vs_Tu_hom	ENSDARG00000024433	pvalb4	0.0411926	-0.192284
deseq2-9_41000001_47000000	AB_hom_vs_Tu_hom	ENSDARG00000010962	fkbp7	0.0475825	-0.455267
deseq2-9_41000001_47000000	AB_Tu_het_vs_Tu_hom	ENSDARG00000040614	sestd1	0.00104663	0.161389
deseq2-9_41000001_47000000	AB_Tu_het_vs_Tu_hom	ENSDARG00000078415	lrrc3	0.00333847	0.798114
deseq2-9_41000001_47000000	AB_Tu_het_vs_Tu_hom	ENSDARG00000094821	si:ch73-44m9.2	0.00333847	2.67837
deseq2-9_41000001_47000000	AB_Tu_het_vs_Tu_hom	ENSDARG00000073820	zgc:174917	0.0251757	2.08315
deseq2-9_41000001_47000000	AB_Tu_het_vs_Tu_hom	ENSDARG00000062045	il1rapl1a	0.032048	0.151741
deseq2-22_14000001_16000000	AB_Tu_het_vs_Tu_hom	ENSDARG00000094089	sult3st3	3.49582e-49	4.74342
deseq2-22_14000001_16000000	AB_Tu_het_vs_Tu_hom	ENSDARG00000071355	si:ch211-197g15.7	2.36434e-21	-1.34876
deseq2-22_14000001_16000000	AB_Tu_het_vs_Tu_hom	ENSDARG00000002293	si:ch211-197g15.6	1.27482e-19	0.746685
deseq2-22_14000001_16000000	AB_Tu_het_vs_Tu_hom	ENSDARG00000057159	ankrd29	1.24707e-17	-0.521098
deseq2-22_14000001_16000000	AB_Tu_het_vs_Tu_hom	ENSDARG00000020054	aox6	3.67066e-16	-0.370706
deseq2-22_14000001_16000000	AB_Tu_het_vs_Tu_hom	ENSDARG00000040781	sult3st4	2.05092e-15	-1.05064
deseq2-22_14000001_16000000	AB_Tu_het_vs_Tu_hom	ENSDARG00000042742	stx6	2.45526e-14	0.244857
deseq2-22_14000001_16000000	AB_Tu_het_vs_Tu_hom	ENSDARG00000109371	pdgfaa	9.01849e-11	-2.64345
deseq2-22_14000001_16000000	AB_Tu_het_vs_Tu_hom	ENSDARG00000095006	CR388079.2	2.96721e-10	-2.13723
deseq2-22_14000001_16000000	AB_Tu_het_vs_Tu_hom	ENSDARG00000055100	cxcl12b	3.16462e-10	-0.39189
deseq2-22_14000001_16000000	AB_Tu_het_vs_Tu_hom	ENSDARG00000062355	axdnd1	5.44349e-10	-0.509986
deseq2-22_14000001_16000000	AB_Tu_het_vs_Tu_hom	ENSDARG00000074546	si:ch211-213a13.2	1.04423e-09	-0.578827
deseq2-22_14000001_16000000	AB_Tu_het_vs_Tu_hom	ENSDARG00000005783	ncanb	1.25288e-09	0.40889
deseq2-22_14000001_16000000	AB_Tu_het_vs_Tu_hom	ENSDARG00000004840	rassf1	3.21096e-09	0.281955
deseq2-22_14000001_16000000	AB_Tu_het_vs_Tu_hom	ENSDARG00000018542	hapln4	1.08752e-08	-0.398078
deseq2-22_14000001_16000000	AB_Tu_het_vs_Tu_hom	ENSDARG00000034211	capn2l	1.5241e-08	0.445144
deseq2-22_14000001_16000000	AB_Tu_het_vs_Tu_hom	ENSDARG00000095147	krt96	1.68521e-08	-0.872224
deseq2-22_14000001_16000000	AB_Tu_het_vs_Tu_hom	ENSDARG00000093024	si:ch211-213a13.2	1.78959e-08	-0.927795
deseq2-22_14000001_16000000	AB_Tu_het_vs_Tu_hom	ENSDARG00000109202	BX324216.3	2.65222e-08	0.855305
deseq2-22_14000001_16000000	AB_Tu_het_vs_Tu_hom	ENSDARG00000111515	CABZ01061498.1	2.71326e-08	1.15777
deseq2-22_14000001_16000000	AB_Tu_het_vs_Tu_hom	ENSDARG00000110069	pdgfaa	4.81232e-08	0.784484
deseq2-22_14000001_16000000	AB_Tu_het_vs_Tu_hom	ENSDARG00000074844	CABZ01061495.1	1.13632e-07	0.648433
deseq2-22_14000001_16000000	AB_Tu_het_vs_Tu_hom	ENSDARG00000071518	krt222	3.28725e-07	-0.194432
deseq2-22_14000001_16000000	AB_Tu_het_vs_Tu_hom	ENSDARG00000092266	si:ch73-27e22.2	3.40234e-07	-1.98166
deseq2-22_14000001_16000000	AB_Tu_het_vs_Tu_hom	ENSDARG00000025670	fstl3	3.41028e-07	-0.278068
deseq2-22_14000001_16000000	AB_Tu_het_vs_Tu_hom	ENSDARG00000095643	si:dkey-253d23.3	9.42096e-07	0.389269
deseq2-22_14000001_16000000	AB_Tu_het_vs_Tu_hom	ENSDARG00000100940	nr5a2	1.02679e-06	-0.22816
deseq2-22_14000001_16000000	AB_Tu_het_vs_Tu_hom	ENSDARG00000061138	senp7b	1.0931e-06	0.187576
deseq2-22_14000001_16000000	AB_Tu_het_vs_Tu_hom	ENSDARG00000057598	s100b	1.11367e-06	-0.287713
deseq2-22_14000001_16000000	AB_Tu_het_vs_Tu_hom	ENSDARG00000093964	si:ch211-250k18.6	1.11367e-06	-0.64489
deseq2-22_14000001_16000000	AB_Tu_het_vs_Tu_hom	ENSDARG00000071495	sult3st5	2.29064e-06	-0.592956
deseq2-22_14000001_16000000	AB_Tu_het_vs_Tu_hom	ENSDARG00000079986	BX927329.1	2.49258e-06	0.953999
deseq2-22_14000001_16000000	AB_Tu_het_vs_Tu_hom	ENSDARG00000093761	si:ch211-250k18.7	3.81962e-06	-0.970057
deseq2-22_14000001_16000000	AB_Tu_het_vs_Tu_hom	ENSDARG00000071333	si:ch211-212d10.2	4.23004e-06	0.214387
deseq2-22_14000001_16000000	AB_Tu_het_vs_Tu_hom	ENSDARG00000058537	si:dkey-102c8.2	4.51476e-06	-1.5683
deseq2-22_14000001_16000000	AB_Tu_het_vs_Tu_hom	ENSDARG00000103309	BX664625.4	4.55731e-06	-2.27176
deseq2-22_14000001_16000000	AB_Tu_het_vs_Tu_hom	ENSDARG00000094747	si:ch211-197g15.6	1.08389e-05	0.983542
deseq2-22_14000001_16000000	AB_Tu_het_vs_Tu_hom	ENSDARG00000099023	CABZ01034698.1	1.3146e-05	-1.39638
deseq2-22_14000001_16000000	AB_Tu_het_vs_Tu_hom	ENSDARG00000077415	zmp:0000001175	2.27244e-05	0.856508
deseq2-22_14000001_16000000	AB_Tu_het_vs_Tu_hom	ENSDARG00000079325	CABZ01046432.1	2.31717e-05	-1.59432
deseq2-22_14000001_16000000	AB_Tu_het_vs_Tu_hom	ENSDARG00000090600	si:ch211-213a13.1	2.70913e-05	0.775968
deseq2-22_14000001_16000000	AB_Tu_het_vs_Tu_hom	ENSDARG00000109368	si:dkey-182g1.2	2.87e-05	-1.56837
deseq2-22_14000001_16000000	AB_Tu_het_vs_Tu_hom	ENSDARG00000008306	rdh5	3.12188e-05	0.235266
deseq2-22_14000001_16000000	AB_Tu_het_vs_Tu_hom	ENSDARG00000077115	si:ch73-44m9.1	3.74982e-05	-1.47841
deseq2-22_14000001_16000000	AB_Tu_het_vs_Tu_hom	ENSDARG00000043131	BX664625.1	4.76485e-05	1.00243
deseq2-22_14000001_16000000	AB_Tu_het_vs_Tu_hom	ENSDARG00000042753	cts12	5.26615e-05	0.455116
deseq2-22_14000001_16000000	AB_Tu_het_vs_Tu_hom	ENSDARG00000102295	dnaja3b	5.828e-05	0.18439
deseq2-22_14000001_16000000	AB_Tu_het_vs_Tu_hom	ENSDARG00000093619	sult3st2	6.02216e-05	-0.285811
deseq2-22_14000001_16000000	AB_Tu_het_vs_Tu_hom	ENSDARG00000063051	bap1	6.80623e-05	0.120119
deseq2-22_14000001_16000000	AB_Tu_het_vs_Tu_hom	ENSDARG00000071588	BX539307.1	7.28672e-05	-1.57446
deseq2-22_14000001_16000000	AB_Tu_het_vs_Tu_hom	ENSDARG00000108332	FO393424.1	8.42152e-05	1.62181
deseq2-22_14000001_16000000	AB_Tu_het_vs_Tu_hom	ENSDARG00000061414	slx4	9.3569e-05	-0.192667
deseq2-22_14000001_16000000	AB_Tu_het_vs_Tu_hom	ENSDARG00000032087	sgsh	0.000118281	-0.278306
deseq2-22_14000001_16000000	AB_Tu_het_vs_Tu_hom	ENSDARG00000102308	ttc39c	0.000142735	-0.117474
deseq2-22_14000001_16000000	AB_Tu_het_vs_Tu_hom	ENSDARG00000111423	si:ch73-27e22.1	0.000164219	-1.42481
deseq2-22_14000001_16000000	AB_Tu_het_vs_Tu_hom	ENSDARG00000098740	CABZ01046427.2	0.000267249	-1.45124
deseq2-22_14000001_16000000	AB_Tu_het_vs_Tu_hom	ENSDARG00000093402	si:dkey-286j17.4	0.000267249	1.21238
deseq2-22_14000001_16000000	AB_Tu_het_vs_Tu_hom	ENSDARG00000029841	tmprss9	0.000279812	0.28111
deseq2-22_14000001_16000000	AB_Tu_het_vs_Tu_hom	ENSDARG00000062372	nrd1b	0.000293463	0.202804
deseq2-22_14000001_16000000	AB_Tu_het_vs_Tu_hom	ENSDARG00000042308	arhgef18b	0.000402015	0.254351
deseq2-22_14000001_16000000	AB_Tu_het_vs_Tu_hom	ENSDARG00000071590	si:ch211-236g6.1	0.00040917	1.41313
deseq2-22_14000001_16000000	AB_Tu_het_vs_Tu_hom	ENSDARG00000038242	zgc:113333	0.00052033	-0.172733
deseq2-22_14000001_16000000	AB_Tu_het_vs_Tu_hom	ENSDARG00000040640	si:ch73-44m9.3	0.000557115	-1.52235
deseq2-22_14000001_16000000	AB_Tu_het_vs_Tu_hom	ENSDARG00000087046	si:ch211-222k6.2	0.000564294	0.551508
deseq2-22_14000001_16000000	AB_Tu_het_vs_Tu_hom	ENSDARG00000116833	CABZ01077220.2	0.00077114	-0.331819
deseq2-22_14000001_16000000	AB_Tu_het_vs_Tu_hom	ENSDARG00000069708	cdc34a	0.000973876	-0.136629
deseq2-22_14000001_16000000	AB_Tu_het_vs_Tu_hom	ENSDARG00000043171	cela1.4	0.0011389	0.621845
deseq2-22_14000001_16000000	AB_Tu_het_vs_Tu_hom	ENSDARG00000034667	CABZ01090041.1	0.00119474	-0.488154
deseq2-22_14000001_16000000	AB_Tu_het_vs_Tu_hom	ENSDARG00000116843	BX324216.4	0.0013039	1.07187
deseq2-22_14000001_16000000	AB_Tu_het_vs_Tu_hom	ENSDARG00000077068	si:ch211-11p18.6	0.00139567	1.08693
deseq2-22_14000001_16000000	AB_Tu_het_vs_Tu_hom	ENSDARG00000007421	ftcd	0.00240611	-0.270732
deseq2-22_14000001_16000000	AB_Tu_het_vs_Tu_hom	ENSDARG00000051914	slc14a2	0.00279039	-0.382443
deseq2-22_14000001_16000000	AB_Tu_het_vs_Tu_hom	ENSDARG00000019998	slc30a7	0.00378016	-0.116966
deseq2-22_14000001_16000000	AB_Tu_het_vs_Tu_hom	ENSDARG00000075476	nlrp15	0.00378016	-1.31798
deseq2-22_14000001_16000000	AB_Tu_het_vs_Tu_hom	ENSDARG00000036767	urgcp	0.00424201	-0.718604
deseq2-22_14000001_16000000	AB_Tu_het_vs_Tu_hom	ENSDARG00000079236	si:dkey-253d23.11	0.00431343	0.377677
deseq2-22_14000001_16000000	AB_Tu_het_vs_Tu_hom	ENSDARG00000032516	rrp36	0.00532031	-0.177572
deseq2-22_14000001_16000000	AB_Tu_het_vs_Tu_hom	ENSDARG00000013928	plekhb2	0.00532031	0.12026
deseq2-22_14000001_16000000	AB_Tu_het_vs_Tu_hom	ENSDARG00000001818	c3b.2	0.00540806	0.267266
deseq2-22_14000001_16000000	AB_Tu_het_vs_Tu_hom	ENSDARG00000058322	enc3	0.00554472	0.133555
deseq2-22_14000001_16000000	AB_Tu_het_vs_Tu_hom	ENSDARG00000071549	ecm2	0.00632823	-0.22587
deseq2-22_14000001_16000000	AB_Tu_het_vs_Tu_hom	ENSDARG00000069453	zgc:113314	0.00666515	-0.263127
deseq2-22_14000001_16000000	AB_Tu_het_vs_Tu_hom	ENSDARG00000113065	AL929276.1	0.00687704	1.50393
deseq2-22_14000001_16000000	AB_Tu_het_vs_Tu_hom	ENSDARG00000094427	si:dkey-253d23.8	0.0100875	0.552897
deseq2-22_14000001_16000000	AB_Tu_het_vs_Tu_hom	ENSDARG00000042925	mfng	0.0112916	-0.277046
deseq2-22_14000001_16000000	AB_Tu_het_vs_Tu_hom	ENSDARG00000090461	si:ch211-197f20.1	0.0119339	-0.474242
deseq2-22_14000001_16000000	AB_Tu_het_vs_Tu_hom	ENSDARG00000069476	spint2	0.0126859	-0.180218
deseq2-22_14000001_16000000	AB_Tu_het_vs_Tu_hom	ENSDARG00000087575	zmp:0000000912	0.013732	-0.816265
deseq2-22_14000001_16000000	AB_Tu_het_vs_Tu_hom	ENSDARG00000043168	cela1.5	0.0141783	1.36408
deseq2-22_14000001_16000000	AB_Tu_het_vs_Tu_hom	ENSDARG00000091954	si:dkeyp-122a9.1	0.0146182	1.54627
deseq2-22_14000001_16000000	AB_Tu_het_vs_Tu_hom	ENSDARG00000109109	FO393424.2	0.0151943	1.16115
deseq2-22_14000001_16000000	AB_Tu_het_vs_Tu_hom	ENSDARG00000076146	zgc:172075	0.0154073	-0.38416
deseq2-22_14000001_16000000	AB_Tu_het_vs_Tu_hom	ENSDARG00000086584	CABZ01077217.2	0.0163327	0.855557
deseq2-22_14000001_16000000	AB_Tu_het_vs_Tu_hom	ENSDARG00000006192	gatad2ab	0.0163327	-0.0861474
deseq2-22_14000001_16000000	AB_Tu_het_vs_Tu_hom	ENSDARG00000017127	pdzk1ip1	0.0168201	0.233722
deseq2-22_14000001_16000000	AB_Tu_het_vs_Tu_hom	ENSDARG00000062702	ankmy1	0.0168201	-0.373511
deseq2-22_14000001_16000000	AB_Tu_het_vs_Tu_hom	ENSDARG00000003446	ippk	0.0171068	0.229768
deseq2-22_14000001_16000000	AB_Tu_het_vs_Tu_hom	ENSDARG00000009134	hlx1	0.0171068	0.174842
deseq2-22_14000001_16000000	AB_Tu_het_vs_Tu_hom	ENSDARG00000034705	pvalb7	0.0171068	-0.161931
deseq2-22_14000001_16000000	AB_Tu_het_vs_Tu_hom	ENSDARG00000043173	cela1.3	0.017277	1.34073
deseq2-22_14000001_16000000	AB_Tu_het_vs_Tu_hom	ENSDARG00000076965	cep70	0.0173619	0.255078
deseq2-22_14000001_16000000	AB_Tu_het_vs_Tu_hom	ENSDARG00000099006	CABZ01029938.1	0.0192881	-1.5531
deseq2-22_14000001_16000000	AB_Tu_het_vs_Tu_hom	ENSDARG00000028159	tead1a	0.0192881	0.236911
deseq2-22_14000001_16000000	AB_Tu_het_vs_Tu_hom	ENSDARG00000019881	bsg	0.0194052	-0.0572894
deseq2-22_14000001_16000000	AB_Tu_het_vs_Tu_hom	ENSDARG00000100311	si:dkey-165e24.1	0.0210765	-0.282663
deseq2-22_14000001_16000000	AB_Tu_het_vs_Tu_hom	ENSDARG00000091757	adgrf6	0.0232637	-0.21139
deseq2-22_14000001_16000000	AB_Tu_het_vs_Tu_hom	ENSDARG00000093316	adgrf8	0.0238415	-0.48595
deseq2-22_14000001_16000000	AB_Tu_het_vs_Tu_hom	ENSDARG00000021688	mxa	0.0280871	-0.820826
deseq2-22_14000001_16000000	AB_Tu_het_vs_Tu_hom	ENSDARG00000003091	oclnb	0.0287761	-0.20788
deseq2-22_14000001_16000000	AB_Tu_het_vs_Tu_hom	ENSDARG00000099511	CABZ01034698.2	0.0287761	-1.52051
deseq2-22_14000001_16000000	AB_Tu_het_vs_Tu_hom	ENSDARG00000103351	FP102192.2	0.0305832	-0.501916
deseq2-22_14000001_16000000	AB_Tu_het_vs_Tu_hom	ENSDARG00000045661	irf7	0.0349367	-0.386123
deseq2-22_14000001_16000000	AB_Tu_het_vs_Tu_hom	ENSDARG00000061256	si:dkey-44g23.5	0.0355735	-0.122773
deseq2-22_14000001_16000000	AB_Tu_het_vs_Tu_hom	ENSDARG00000021346	pdhb	0.0356055	-0.097373
deseq2-22_14000001_16000000	AB_Tu_het_vs_Tu_hom	ENSDARG00000070542	mafbb	0.0364192	-0.216982
deseq2-22_14000001_16000000	AB_Tu_het_vs_Tu_hom	ENSDARG00000095820	BX649485.4	0.0392064	1.55488
deseq2-22_14000001_16000000	AB_Tu_het_vs_Tu_hom	ENSDARG00000087623	BX649485.1	0.0401217	1.29023
deseq2-22_14000001_16000000	AB_Tu_het_vs_Tu_hom	ENSDARG00000012381	hsc70	0.0404116	0.15878
deseq2-22_14000001_16000000	AB_Tu_het_vs_Tu_hom	ENSDARG00000078476	znf990	0.0448276	0.359857
deseq2-22_14000001_16000000	AB_Tu_het_vs_Tu_hom	ENSDARG00000097700	si:dkey-23k10.2	0.0448276	-0.402326
deseq2-22_14000001_16000000	AB_Tu_het_vs_Tu_hom	ENSDARG00000011797	tent5bb	0.0448824	-0.15724
deseq2-22_14000001_16000000	AB_Tu_het_vs_Tu_hom	ENSDARG00000103193	CR394535.1	0.0483531	-0.406981
deseq2-22_14000001_16000000	AB_Tu_het_vs_Tu_hom	ENSDARG00000014995	jagn1b	0.0493856	-0.133625
deseq2-2_30000001_31000000	AB_Tu_het_vs_AB_hom	ENSDARG00000076043	si:dkeyp-73d8.9	6.17531e-20	2.206
deseq2-2_30000001_31000000	AB_Tu_het_vs_AB_hom	ENSDARG00000038826	jph1b	7.06552e-07	0.298238
deseq2-2_30000001_31000000	AB_Tu_het_vs_AB_hom	ENSDARG00000079589	si:dkeyp-73d8.6	4.49185e-06	2.72072
deseq2-2_30000001_31000000	AB_Tu_het_vs_AB_hom	ENSDARG00000094045	si:dkeyp-73d8.8	9.76113e-05	-1.06944
deseq2-2_30000001_31000000	AB_Tu_het_vs_AB_hom	ENSDARG00000011998	bfsp2	0.000106405	0.218297
deseq2-2_30000001_31000000	AB_Tu_het_vs_AB_hom	ENSDARG00000068474	si:dkey-94e7.2	0.000373049	0.352094
deseq2-2_30000001_31000000	AB_Tu_het_vs_AB_hom	ENSDARG00000091280	si:ch211-66k16.27	0.00107779	0.783758
deseq2-2_30000001_31000000	AB_Tu_het_vs_AB_hom	ENSDARG00000053101	prpf38b	0.00144188	0.21557
deseq2-2_30000001_31000000	AB_Tu_het_vs_AB_hom	ENSDARG00000038898	zgc:113691	0.00172508	1.24327
deseq2-2_30000001_31000000	AB_Tu_het_vs_AB_hom	ENSDARG00000038786	smarcd3a	0.00596042	0.214416
deseq2-2_30000001_31000000	AB_Tu_het_vs_AB_hom	ENSDARG00000031783	adcy8	0.00676792	0.480801
deseq2-2_30000001_31000000	AB_Tu_het_vs_AB_hom	ENSDARG00000054202	hbl4	0.00676792	-0.655206
deseq2-2_30000001_31000000	AB_Tu_het_vs_AB_hom	ENSDARG00000038743	copb2	0.0113776	0.169996
deseq2-2_30000001_31000000	AB_Tu_het_vs_AB_hom	ENSDARG00000023157	cbln10	0.012505	-0.549689
deseq2-2_30000001_31000000	AB_Tu_het_vs_AB_hom	ENSDARG00000060637	clstn2	0.014764	-0.206043
deseq2-2_30000001_31000000	AB_Tu_het_vs_AB_hom	ENSDARG00000068143	slc39a6	0.0212033	0.134645
deseq2-2_30000001_31000000	AB_Tu_het_vs_AB_hom	ENSDARG00000027584	ttpa	0.0367609	-0.364541
deseq2-2_30000001_31000000	AB_Tu_het_vs_AB_hom	ENSDARG00000053155	alg3	0.0367609	-0.250276
deseq2-2_30000001_31000000	AB_Tu_het_vs_AB_hom	ENSDARG00000044923	ube2w	0.0488428	-0.194384
deseq2-2_30000001_31000000	AB_hom_vs_Tu_hom	ENSDARG00000076043	si:dkeyp-73d8.9	1.35e-33	-3.00501
deseq2-2_30000001_31000000	AB_hom_vs_Tu_hom	ENSDARG00000094045	si:dkeyp-73d8.8	1.70813e-29	3.91353
deseq2-2_30000001_31000000	AB_hom_vs_Tu_hom	ENSDARG00000079412	ftr02	9.2486e-24	2.60417
deseq2-2_30000001_31000000	AB_hom_vs_Tu_hom	ENSDARG00000068431	si:ch211-195h23.3	2.51065e-22	2.28964
deseq2-2_30000001_31000000	AB_hom_vs_Tu_hom	ENSDARG00000038826	jph1b	1.78482e-20	-0.49977
deseq2-2_30000001_31000000	AB_hom_vs_Tu_hom	ENSDARG00000011998	bfsp2	3.3428e-17	-0.395218
deseq2-2_30000001_31000000	AB_hom_vs_Tu_hom	ENSDARG00000023157	cbln10	1.06276e-16	1.24512
deseq2-2_30000001_31000000	AB_hom_vs_Tu_hom	ENSDARG00000054202	hbl4	2.47866e-16	1.44456
deseq2-2_30000001_31000000	AB_hom_vs_Tu_hom	ENSDARG00000053155	alg3	6.77422e-16	0.594524
deseq2-2_30000001_31000000	AB_hom_vs_Tu_hom	ENSDARG00000097911	CU179756.1	4.51303e-15	3.71261
deseq2-2_30000001_31000000	AB_hom_vs_Tu_hom	ENSDARG00000031783	adcy8	4.51303e-15	-0.973005
deseq2-2_30000001_31000000	AB_hom_vs_Tu_hom	ENSDARG00000027584	ttpa	1.33908e-12	0.768561
deseq2-2_30000001_31000000	AB_hom_vs_Tu_hom	ENSDARG00000079589	si:dkeyp-73d8.6	9.4923e-12	-3.71582
deseq2-2_30000001_31000000	AB_hom_vs_Tu_hom	ENSDARG00000060637	clstn2	1.46315e-11	0.393106
deseq2-2_30000001_31000000	AB_hom_vs_Tu_hom	ENSDARG00000021398	mul1a	2.30817e-11	-0.552651
deseq2-2_30000001_31000000	AB_hom_vs_Tu_hom	ENSDARG00000033451	atpsckmt	2.38524e-11	0.729711
deseq2-2_30000001_31000000	AB_hom_vs_Tu_hom	ENSDARG00000038743	copb2	2.80355e-11	-0.311894
deseq2-2_30000001_31000000	AB_hom_vs_Tu_hom	ENSDARG00000017038	zgc:152670	2.80355e-11	3.00571
deseq2-2_30000001_31000000	AB_hom_vs_Tu_hom	ENSDARG00000068474	si:dkey-94e7.2	2.86688e-11	-0.535571
deseq2-2_30000001_31000000	AB_hom_vs_Tu_hom	ENSDARG00000091280	si:ch211-66k16.27	5.47728e-11	-1.24879
deseq2-2_30000001_31000000	AB_hom_vs_Tu_hom	ENSDARG00000004880	acsm3	9.71489e-10	-0.522518
deseq2-2_30000001_31000000	AB_hom_vs_Tu_hom	ENSDARG00000007553	opn4.1	1.09439e-09	-0.272453
deseq2-2_30000001_31000000	AB_hom_vs_Tu_hom	ENSDARG00000038585	eif4e2	1.15271e-09	0.45263
deseq2-2_30000001_31000000	AB_hom_vs_Tu_hom	ENSDARG00000117510	CU302321.1	3.57424e-08	3.37515
deseq2-2_30000001_31000000	AB_hom_vs_Tu_hom	ENSDARG00000094514	si:dkey-7l6.3	7.17934e-08	-0.485418
deseq2-2_30000001_31000000	AB_hom_vs_Tu_hom	ENSDARG00000092813	fndc7rs4	8.51769e-08	0.486027
deseq2-2_30000001_31000000	AB_hom_vs_Tu_hom	ENSDARG00000053845	cbln14	1.19732e-07	-1.10387
deseq2-2_30000001_31000000	AB_hom_vs_Tu_hom	ENSDARG00000053366	ftr12	1.19732e-07	-1.91694
deseq2-2_30000001_31000000	AB_hom_vs_Tu_hom	ENSDARG00000068240	trim110	1.60638e-07	1.02899
deseq2-2_30000001_31000000	AB_hom_vs_Tu_hom	ENSDARG00000018077	rbp1.1	1.60786e-07	0.490089
deseq2-2_30000001_31000000	AB_hom_vs_Tu_hom	ENSDARG00000021022	ift57	1.82555e-07	-0.397284
deseq2-2_30000001_31000000	AB_hom_vs_Tu_hom	ENSDARG00000023181	pcp4l1	1.98343e-07	-0.3678
deseq2-2_30000001_31000000	AB_hom_vs_Tu_hom	ENSDARG00000103889	mettl17	3.17247e-07	0.296636
deseq2-2_30000001_31000000	AB_hom_vs_Tu_hom	ENSDARG00000038898	zgc:113691	6.48944e-07	-1.61448
deseq2-2_30000001_31000000	AB_hom_vs_Tu_hom	ENSDARG00000053101	prpf38b	1.85366e-06	-0.2765
deseq2-2_30000001_31000000	AB_hom_vs_Tu_hom	ENSDARG00000010583	pard3ab	5.44905e-06	-0.249248
deseq2-2_30000001_31000000	AB_hom_vs_Tu_hom	ENSDARG00000086104	slco5a1a	1.23333e-05	-0.205776
deseq2-2_30000001_31000000	AB_hom_vs_Tu_hom	ENSDARG00000099617	sdr39u1	1.79947e-05	-0.258599
deseq2-2_30000001_31000000	AB_hom_vs_Tu_hom	ENSDARG00000053293	ftr14	5.58991e-05	-0.574575
deseq2-2_30000001_31000000	AB_hom_vs_Tu_hom	ENSDARG00000075886	vwa5b2	5.63331e-05	-0.688615
deseq2-2_30000001_31000000	AB_hom_vs_Tu_hom	ENSDARG00000057013	cadm3	7.35349e-05	0.167465
deseq2-2_30000001_31000000	AB_hom_vs_Tu_hom	ENSDARG00000038786	smarcd3a	8.02492e-05	-0.260434
deseq2-2_30000001_31000000	AB_hom_vs_Tu_hom	ENSDARG00000054292	si:ch211-14a17.11	9.84467e-05	-0.303242
deseq2-2_30000001_31000000	AB_hom_vs_Tu_hom	ENSDARG00000102729	SAMD9	0.000100916	-2.10943
deseq2-2_30000001_31000000	AB_hom_vs_Tu_hom	ENSDARG00000014692	znf622	0.000158261	-0.224371
deseq2-2_30000001_31000000	AB_hom_vs_Tu_hom	ENSDARG00000003244	gbp3	0.000158261	0.320374
deseq2-2_30000001_31000000	AB_hom_vs_Tu_hom	ENSDARG00000054170	ltb4r2b	0.000337954	-0.719788
deseq2-2_30000001_31000000	AB_hom_vs_Tu_hom	ENSDARG00000105141	FO704635.1	0.000337954	-0.63654
deseq2-2_30000001_31000000	AB_hom_vs_Tu_hom	ENSDARG00000086990	carmil3	0.000337954	0.210528
deseq2-2_30000001_31000000	AB_hom_vs_Tu_hom	ENSDARG00000038742	rbp1.2	0.000410729	-0.948305
deseq2-2_30000001_31000000	AB_hom_vs_Tu_hom	ENSDARG00000041960	si:ch211-173a9.6	0.000410729	0.438917
deseq2-2_30000001_31000000	AB_hom_vs_Tu_hom	ENSDARG00000008784	prpf4ba	0.000410729	-0.234047
deseq2-2_30000001_31000000	AB_hom_vs_Tu_hom	ENSDARG00000079202	parp2	0.000410729	0.333944
deseq2-2_30000001_31000000	AB_hom_vs_Tu_hom	ENSDARG00000074118	ftr12	0.000475986	0.566923
deseq2-2_30000001_31000000	AB_hom_vs_Tu_hom	ENSDARG00000093150	fndc7rs3	0.000614607	0.701768
deseq2-2_30000001_31000000	AB_hom_vs_Tu_hom	ENSDARG00000001721	oc90	0.000637945	0.911069
deseq2-2_30000001_31000000	AB_hom_vs_Tu_hom	ENSDARG00000097253	yeats2	0.0006883	-0.356223
deseq2-2_30000001_31000000	AB_hom_vs_Tu_hom	ENSDARG00000079727	selenop2	0.000998542	0.511377
deseq2-2_30000001_31000000	AB_hom_vs_Tu_hom	ENSDARG00000054754	hs6st1a	0.00105369	-0.289369
deseq2-2_30000001_31000000	AB_hom_vs_Tu_hom	ENSDARG00000074435	ttc19	0.00141237	0.19605
deseq2-2_30000001_31000000	AB_hom_vs_Tu_hom	ENSDARG00000008548	arhgap12a	0.00198409	0.154233
deseq2-2_30000001_31000000	AB_hom_vs_Tu_hom	ENSDARG00000012600	si:dkey-97a13.6	0.00267917	0.485149
deseq2-2_30000001_31000000	AB_hom_vs_Tu_hom	ENSDARG00000117380	LO017954.1	0.002765	-0.584963
deseq2-2_30000001_31000000	AB_hom_vs_Tu_hom	ENSDARG00000093932	ftr04	0.00440233	-2.18585
deseq2-2_30000001_31000000	AB_hom_vs_Tu_hom	ENSDARG00000011600	epha4b	0.00440233	-0.24294
deseq2-2_30000001_31000000	AB_hom_vs_Tu_hom	ENSDARG00000038713	tep1	0.00475912	-0.431184
deseq2-2_30000001_31000000	AB_hom_vs_Tu_hom	ENSDARG00000010816	slc7a14a	0.00814772	-0.17096
deseq2-2_30000001_31000000	AB_hom_vs_Tu_hom	ENSDARG00000078226	cdh12a	0.00991896	0.302681
deseq2-2_30000001_31000000	AB_hom_vs_Tu_hom	ENSDARG00000061196	emilin2a	0.0105074	-0.56741
deseq2-2_30000001_31000000	AB_hom_vs_Tu_hom	ENSDARG00000038894	tmx3a	0.0112615	0.212731
deseq2-2_30000001_31000000	AB_hom_vs_Tu_hom	ENSDARG00000088423	si:ch211-66k16.28	0.0112615	-0.409803
deseq2-2_30000001_31000000	AB_hom_vs_Tu_hom	ENSDARG00000076634	capn10	0.0112615	-0.25308
deseq2-2_30000001_31000000	AB_hom_vs_Tu_hom	ENSDARG00000054337	ap1g2	0.0116535	-0.16192
deseq2-2_30000001_31000000	AB_hom_vs_Tu_hom	ENSDARG00000044923	ube2w	0.0119722	0.214563
deseq2-2_30000001_31000000	AB_hom_vs_Tu_hom	ENSDARG00000079784	si:ch211-235o23.1	0.01275	-0.241983
deseq2-2_30000001_31000000	AB_hom_vs_Tu_hom	ENSDARG00000068143	slc39a6	0.0184164	-0.136266
deseq2-2_30000001_31000000	AB_hom_vs_Tu_hom	ENSDARG00000053318	lrrc6	0.0298304	-0.484159
deseq2-2_30000001_31000000	AB_hom_vs_Tu_hom	ENSDARG00000014209	odf3l2a	0.0320492	0.473855
deseq2-2_30000001_31000000	AB_hom_vs_Tu_hom	ENSDARG00000055192	zgc:136930	0.0405526	0.314797
deseq2-2_30000001_31000000	AB_hom_vs_Tu_hom	ENSDARG00000038905	hectd3	0.0409065	-0.121746
deseq2-2_30000001_31000000	AB_hom_vs_Tu_hom	ENSDARG00000000324	dcaf8	0.0493795	-0.153938
deseq2-2_30000001_31000000	AB_Tu_het_vs_Tu_hom	ENSDARG00000094045	si:dkeyp-73d8.8	5.8948e-15	2.84409
deseq2-2_30000001_31000000	AB_Tu_het_vs_Tu_hom	ENSDARG00000079412	ftr02	3.04112e-14	1.91901
deseq2-2_30000001_31000000	AB_Tu_het_vs_Tu_hom	ENSDARG00000068431	si:ch211-195h23.3	4.84616e-13	1.60764
deseq2-2_30000001_31000000	AB_Tu_het_vs_Tu_hom	ENSDARG00000097911	CU179756.1	2.0374e-10	2.88152
deseq2-2_30000001_31000000	AB_Tu_het_vs_Tu_hom	ENSDARG00000017038	zgc:152670	3.01401e-08	2.44466
deseq2-2_30000001_31000000	AB_Tu_het_vs_Tu_hom	ENSDARG00000038585	eif4e2	3.24694e-06	0.345755
deseq2-2_30000001_31000000	AB_Tu_het_vs_Tu_hom	ENSDARG00000018077	rbp1.1	6.59328e-06	0.414672
deseq2-2_30000001_31000000	AB_Tu_het_vs_Tu_hom	ENSDARG00000117510	CU302321.1	1.72984e-05	2.64056
deseq2-2_30000001_31000000	AB_Tu_het_vs_Tu_hom	ENSDARG00000053155	alg3	1.72984e-05	0.344247
deseq2-2_30000001_31000000	AB_Tu_het_vs_Tu_hom	ENSDARG00000023157	cbln10	1.93543e-05	0.695429
deseq2-2_30000001_31000000	AB_Tu_het_vs_Tu_hom	ENSDARG00000054202	hbl4	8.27466e-05	0.789349
deseq2-2_30000001_31000000	AB_Tu_het_vs_Tu_hom	ENSDARG00000079202	parp2	0.000144509	0.322336
deseq2-2_30000001_31000000	AB_Tu_het_vs_Tu_hom	ENSDARG00000033451	atpsckmt	0.000166202	0.46031
deseq2-2_30000001_31000000	AB_Tu_het_vs_Tu_hom	ENSDARG00000021398	mul1a	0.000277813	-0.327622
deseq2-2_30000001_31000000	AB_Tu_het_vs_Tu_hom	ENSDARG00000031783	adcy8	0.000586982	-0.492204
deseq2-2_30000001_31000000	AB_Tu_het_vs_Tu_hom	ENSDARG00000027584	ttpa	0.00258057	0.40402
deseq2-2_30000001_31000000	AB_Tu_het_vs_Tu_hom	ENSDARG00000011998	bfsp2	0.00270376	-0.176922
deseq2-2_30000001_31000000	AB_Tu_het_vs_Tu_hom	ENSDARG00000004880	acsm3	0.00361497	-0.296792
deseq2-2_30000001_31000000	AB_Tu_het_vs_Tu_hom	ENSDARG00000075886	vwa5b2	0.00401826	-0.50909
deseq2-2_30000001_31000000	AB_Tu_het_vs_Tu_hom	ENSDARG00000038826	jph1b	0.00401826	-0.201532
deseq2-2_30000001_31000000	AB_Tu_het_vs_Tu_hom	ENSDARG00000079784	si:ch211-235o23.1	0.00458233	-0.2367
deseq2-2_30000001_31000000	AB_Tu_het_vs_Tu_hom	ENSDARG00000079605	prmt5	0.00704399	0.201569
deseq2-2_30000001_31000000	AB_Tu_het_vs_Tu_hom	ENSDARG00000041960	si:ch211-173a9.6	0.0117369	0.344145
deseq2-2_30000001_31000000	AB_Tu_het_vs_Tu_hom	ENSDARG00000105141	FO704635.1	0.0122122	-0.487027
deseq2-2_30000001_31000000	AB_Tu_het_vs_Tu_hom	ENSDARG00000092813	fndc7rs4	0.0183585	0.284362
deseq2-2_30000001_31000000	AB_Tu_het_vs_Tu_hom	ENSDARG00000005606	paxip1	0.0183585	0.17535
deseq2-2_30000001_31000000	AB_Tu_het_vs_Tu_hom	ENSDARG00000038894	tmx3a	0.0198822	0.190775
deseq2-2_30000001_31000000	AB_Tu_het_vs_Tu_hom	ENSDARG00000053366	ftr12	0.0207526	-0.972432
deseq2-2_30000001_31000000	AB_Tu_het_vs_Tu_hom	ENSDARG00000091628	cspp1b	0.0219766	0.220087
deseq2-2_30000001_31000000	AB_Tu_het_vs_Tu_hom	ENSDARG00000060637	clstn2	0.0237094	0.187062
deseq2-2_30000001_31000000	AB_Tu_het_vs_Tu_hom	ENSDARG00000053293	ftr14	0.0266842	-0.379648
deseq2-2_30000001_31000000	AB_Tu_het_vs_Tu_hom	ENSDARG00000068240	trim110	0.0278177	0.625902
deseq2-2_30000001_31000000	AB_Tu_het_vs_Tu_hom	ENSDARG00000098820	ftr67	0.0355352	-0.19022
deseq2-2_30000001_31000000	AB_Tu_het_vs_Tu_hom	ENSDARG00000021022	ift57	0.0355352	-0.219136
deseq2-2_30000001_31000000	AB_Tu_het_vs_Tu_hom	ENSDARG00000038742	rbp1.2	0.0366742	-0.677463
deseq2-2_30000001_31000000	AB_Tu_het_vs_Tu_hom	ENSDARG00000078850	plekhm2	0.0366742	-0.186594
deseq2-2_30000001_31000000	AB_Tu_het_vs_Tu_hom	ENSDARG00000007553	opn4.1	0.0389656	-0.133523
deseq2-2_30000001_31000000	AB_Tu_het_vs_Tu_hom	ENSDARG00000103889	mettl17	0.0421122	0.169316
deseq2-2_30000001_31000000	AB_Tu_het_vs_Tu_hom	ENSDARG00000076043	si:dkeyp-73d8.9	0.043184	-0.799018
deseq2-2_30000001_31000000	AB_Tu_het_vs_Tu_hom	ENSDARG00000038743	copb2	0.043184	-0.141898
deseq2-2_30000001_31000000	AB_Tu_het_vs_Tu_hom	ENSDARG00000042613	crp3	0.043184	-0.39823
deseq2-2_30000001_31000000	AB_Tu_het_vs_Tu_hom	ENSDARG00000039354	ska1	0.0445694	0.347458
deseq2-2_30000001_31000000	AB_Tu_het_vs_Tu_hom	ENSDARG00000026540	ppp4r2a	0.0488992	0.18861
deseq2-14_14000001_15000000	AB_Tu_het_vs_AB_hom	ENSDARG00000100366	si:dkey-102m7.3	2.25614e-16	-0.38709
deseq2-14_14000001_15000000	AB_Tu_het_vs_AB_hom	ENSDARG00000071871	glod5	2.31763e-15	0.533281
deseq2-14_14000001_15000000	AB_Tu_het_vs_AB_hom	ENSDARG00000104572	si:dkey-35h6.1	8.91712e-11	-1.12243
deseq2-14_14000001_15000000	AB_Tu_het_vs_AB_hom	ENSDARG00000098293	si:dkey-27i16.2	2.19836e-08	0.526891
deseq2-14_14000001_15000000	AB_Tu_het_vs_AB_hom	ENSDARG00000003035	hspa9	9.35721e-07	0.153398
deseq2-14_14000001_15000000	AB_Tu_het_vs_AB_hom	ENSDARG00000099315	nsdhl	0.00834411	0.367514
deseq2-14_14000001_15000000	AB_Tu_het_vs_AB_hom	ENSDARG00000103053	CR383680.2	0.0230252	1.8277
deseq2-2_32000001_33000000	AB_Tu_het_vs_AB_hom	ENSDARG00000076043	si:dkeyp-73d8.9	6.56634e-187	3.55343
deseq2-2_32000001_33000000	AB_Tu_het_vs_AB_hom	ENSDARG00000079589	si:dkeyp-73d8.6	3.16162e-84	9.00125
deseq2-2_32000001_33000000	AB_Tu_het_vs_AB_hom	ENSDARG00000011998	bfsp2	2.0914e-08	0.258082
deseq2-2_32000001_33000000	AB_Tu_het_vs_AB_hom	ENSDARG00000091280	si:ch211-66k16.27	2.20298e-08	1.02454
deseq2-2_32000001_33000000	AB_Tu_het_vs_AB_hom	ENSDARG00000094045	si:dkeyp-73d8.8	5.67327e-08	-1.16152
deseq2-2_32000001_33000000	AB_Tu_het_vs_AB_hom	ENSDARG00000031783	adcy8	4.17173e-07	0.638672
deseq2-2_32000001_33000000	AB_Tu_het_vs_AB_hom	ENSDARG00000053101	prpf38b	4.15245e-06	0.260013
deseq2-2_32000001_33000000	AB_Tu_het_vs_AB_hom	ENSDARG00000038786	smarcd3a	8.99363e-05	0.254176
deseq2-2_32000001_33000000	AB_Tu_het_vs_AB_hom	ENSDARG00000054202	hbl4	8.99363e-05	-0.769819
deseq2-2_32000001_33000000	AB_Tu_het_vs_AB_hom	ENSDARG00000038826	jph1b	0.000231469	0.281812
deseq2-2_32000001_33000000	AB_Tu_het_vs_AB_hom	ENSDARG00000007553	opn4.1	0.000295764	0.181043
deseq2-2_32000001_33000000	AB_Tu_het_vs_AB_hom	ENSDARG00000038743	copb2	0.000389084	0.189404
deseq2-2_32000001_33000000	AB_Tu_het_vs_AB_hom	ENSDARG00000023157	cbln10	0.000389084	-0.654214
deseq2-2_32000001_33000000	AB_Tu_het_vs_AB_hom	ENSDARG00000053366	ftr12	0.000687695	1.69742
deseq2-2_32000001_33000000	AB_Tu_het_vs_AB_hom	ENSDARG00000053845	cbln14	0.000711378	0.834039
deseq2-2_32000001_33000000	AB_Tu_het_vs_AB_hom	ENSDARG00000021398	mul1a	0.000978646	0.337898
deseq2-2_32000001_33000000	AB_Tu_het_vs_AB_hom	ENSDARG00000060637	clstn2	0.00210365	-0.21505
deseq2-2_32000001_33000000	AB_Tu_het_vs_AB_hom	ENSDARG00000023181	pcp4l1	0.00277132	0.258234
deseq2-2_32000001_33000000	AB_Tu_het_vs_AB_hom	ENSDARG00000068474	si:dkey-94e7.2	0.00277132	0.34728
deseq2-2_32000001_33000000	AB_Tu_het_vs_AB_hom	ENSDARG00000079412	ftr02	0.00598396	-0.848035
deseq2-2_32000001_33000000	AB_Tu_het_vs_AB_hom	ENSDARG00000038716	casq1a	0.0204921	0.416007
deseq2-2_32000001_33000000	AB_Tu_het_vs_AB_hom	ENSDARG00000053155	alg3	0.021417	-0.251401
deseq2-2_32000001_33000000	AB_Tu_het_vs_AB_hom	ENSDARG00000038898	zgc:113691	0.021417	1.1824
deseq2-2_32000001_33000000	AB_Tu_het_vs_AB_hom	ENSDARG00000021022	ift57	0.0261319	0.251414
deseq2-2_32000001_33000000	AB_Tu_het_vs_AB_hom	ENSDARG00000004880	acsm3	0.0308774	0.28109
deseq2-2_32000001_33000000	AB_Tu_het_vs_AB_hom	ENSDARG00000093124	scpp8	0.0308774	-1.07582
deseq2-2_32000001_33000000	AB_Tu_het_vs_AB_hom	ENSDARG00000045089	si:ch211-270n8.1	0.0371099	-1.4773
deseq2-2_32000001_33000000	AB_Tu_het_vs_AB_hom	ENSDARG00000068431	si:ch211-195h23.3	0.0422514	-0.787594
deseq2-2_32000001_33000000	AB_Tu_het_vs_AB_hom	ENSDARG00000086104	slco5a1a	0.0493027	0.136452
deseq2-2_32000001_33000000	AB_Tu_het_vs_AB_hom	ENSDARG00000005104	limk2	0.0496548	-0.102224
deseq2-2_32000001_33000000	AB_hom_vs_Tu_hom	ENSDARG00000076043	si:dkeyp-73d8.9	4.46003e-287	-4.4668
deseq2-2_32000001_33000000	AB_hom_vs_Tu_hom	ENSDARG00000079589	si:dkeyp-73d8.6	5.24334e-107	-10.1352
deseq2-2_32000001_33000000	AB_hom_vs_Tu_hom	ENSDARG00000094045	si:dkeyp-73d8.8	1.22843e-36	4.10492
deseq2-2_32000001_33000000	AB_hom_vs_Tu_hom	ENSDARG00000079412	ftr02	9.45426e-31	2.72992
deseq2-2_32000001_33000000	AB_hom_vs_Tu_hom	ENSDARG00000068431	si:ch211-195h23.3	6.14952e-28	2.44037
deseq2-2_32000001_33000000	AB_hom_vs_Tu_hom	ENSDARG00000011998	bfsp2	3.41631e-27	-0.452638
deseq2-2_32000001_33000000	AB_hom_vs_Tu_hom	ENSDARG00000031783	adcy8	1.31336e-24	-1.14777
deseq2-2_32000001_33000000	AB_hom_vs_Tu_hom	ENSDARG00000097911	CU179756.1	8.59843e-22	4.12244
deseq2-2_32000001_33000000	AB_hom_vs_Tu_hom	ENSDARG00000054202	hbl4	1.8973e-20	1.55067
deseq2-2_32000001_33000000	AB_hom_vs_Tu_hom	ENSDARG00000053155	alg3	4.37483e-20	0.64092
deseq2-2_32000001_33000000	AB_hom_vs_Tu_hom	ENSDARG00000091280	si:ch211-66k16.27	2.39354e-19	-1.53069
deseq2-2_32000001_33000000	AB_hom_vs_Tu_hom	ENSDARG00000023157	cbln10	3.24747e-18	1.29687
deseq2-2_32000001_33000000	AB_hom_vs_Tu_hom	ENSDARG00000060637	clstn2	6.04102e-18	0.452059
deseq2-2_32000001_33000000	AB_hom_vs_Tu_hom	ENSDARG00000038743	copb2	1.75202e-17	-0.361283
deseq2-2_32000001_33000000	AB_hom_vs_Tu_hom	ENSDARG00000007553	opn4.1	5.0906e-16	-0.325308
deseq2-2_32000001_33000000	AB_hom_vs_Tu_hom	ENSDARG00000021398	mul1a	2.59095e-15	-0.628893
deseq2-2_32000001_33000000	AB_hom_vs_Tu_hom	ENSDARG00000004880	acsm3	2.40004e-14	-0.60455
deseq2-2_32000001_33000000	AB_hom_vs_Tu_hom	ENSDARG00000053366	ftr12	4.27071e-14	-2.81188
deseq2-2_32000001_33000000	AB_hom_vs_Tu_hom	ENSDARG00000038826	jph1b	1.76957e-13	-0.465245
deseq2-2_32000001_33000000	AB_hom_vs_Tu_hom	ENSDARG00000117510	CU302321.1	1.11502e-11	3.78113
deseq2-2_32000001_33000000	AB_hom_vs_Tu_hom	ENSDARG00000038585	eif4e2	2.8793e-11	0.485822
deseq2-2_32000001_33000000	AB_hom_vs_Tu_hom	ENSDARG00000053845	cbln14	2.8793e-11	-1.31801
deseq2-2_32000001_33000000	AB_hom_vs_Tu_hom	ENSDARG00000023181	pcp4l1	1.05902e-10	-0.42849
deseq2-2_32000001_33000000	AB_hom_vs_Tu_hom	ENSDARG00000021022	ift57	1.83982e-10	-0.461972
deseq2-2_32000001_33000000	AB_hom_vs_Tu_hom	ENSDARG00000017038	zgc:152670	3.76158e-10	2.92059
deseq2-2_32000001_33000000	AB_hom_vs_Tu_hom	ENSDARG00000053101	prpf38b	3.76158e-10	-0.330336
deseq2-2_32000001_33000000	AB_hom_vs_Tu_hom	ENSDARG00000018077	rbp1.1	1.20992e-08	0.522954
deseq2-2_32000001_33000000	AB_hom_vs_Tu_hom	ENSDARG00000068240	trim110	1.34836e-08	1.09031
deseq2-2_32000001_33000000	AB_hom_vs_Tu_hom	ENSDARG00000092813	fndc7rs4	1.36913e-08	0.513815
deseq2-2_32000001_33000000	AB_hom_vs_Tu_hom	ENSDARG00000103889	mettl17	2.04548e-08	0.320011
deseq2-2_32000001_33000000	AB_hom_vs_Tu_hom	ENSDARG00000086104	slco5a1a	2.50957e-08	-0.240063
deseq2-2_32000001_33000000	AB_hom_vs_Tu_hom	ENSDARG00000068474	si:dkey-94e7.2	2.9456e-08	-0.509799
deseq2-2_32000001_33000000	AB_hom_vs_Tu_hom	ENSDARG00000027584	ttpa	2.99901e-08	0.695006
deseq2-2_32000001_33000000	AB_hom_vs_Tu_hom	ENSDARG00000038786	smarcd3a	4.17074e-08	-0.319737
deseq2-2_32000001_33000000	AB_hom_vs_Tu_hom	ENSDARG00000099617	sdr39u1	4.33126e-08	-0.299385
deseq2-2_32000001_33000000	AB_hom_vs_Tu_hom	ENSDARG00000094514	si:dkey-7l6.3	7.51687e-08	-0.505126
deseq2-2_32000001_33000000	AB_hom_vs_Tu_hom	ENSDARG00000075886	vwa5b2	2.77775e-07	-0.848319
deseq2-2_32000001_33000000	AB_hom_vs_Tu_hom	ENSDARG00000057013	cadm3	6.50853e-07	0.192512
deseq2-2_32000001_33000000	AB_hom_vs_Tu_hom	ENSDARG00000054292	si:ch211-14a17.11	7.72425e-07	-0.35464
deseq2-2_32000001_33000000	AB_hom_vs_Tu_hom	ENSDARG00000074118	ftr12	9.026e-07	0.684609
deseq2-2_32000001_33000000	AB_hom_vs_Tu_hom	ENSDARG00000001721	oc90	1.03993e-06	1.10737
deseq2-2_32000001_33000000	AB_hom_vs_Tu_hom	ENSDARG00000033451	atpsckmt	1.14343e-06	0.631746
deseq2-2_32000001_33000000	AB_hom_vs_Tu_hom	ENSDARG00000053293	ftr14	1.45457e-06	-0.654688
deseq2-2_32000001_33000000	AB_hom_vs_Tu_hom	ENSDARG00000010583	pard3ab	2.12143e-06	-0.260281
deseq2-2_32000001_33000000	AB_hom_vs_Tu_hom	ENSDARG00000003244	gbp3	4.66926e-06	0.356875
deseq2-2_32000001_33000000	AB_hom_vs_Tu_hom	ENSDARG00000014692	znf622	9.59978e-06	-0.250442
deseq2-2_32000001_33000000	AB_hom_vs_Tu_hom	ENSDARG00000054754	hs6st1a	2.87256e-05	-0.336744
deseq2-2_32000001_33000000	AB_hom_vs_Tu_hom	ENSDARG00000076634	capn10	4.05117e-05	-0.327233
deseq2-2_32000001_33000000	AB_hom_vs_Tu_hom	ENSDARG00000102729	SAMD9	6.04783e-05	-2.34065
deseq2-2_32000001_33000000	AB_hom_vs_Tu_hom	ENSDARG00000105141	FO704635.1	6.82618e-05	-0.702371
deseq2-2_32000001_33000000	AB_hom_vs_Tu_hom	ENSDARG00000054337	ap1g2	8.62232e-05	-0.202286
deseq2-2_32000001_33000000	AB_hom_vs_Tu_hom	ENSDARG00000012600	si:dkey-97a13.6	0.000171238	0.551032
deseq2-2_32000001_33000000	AB_hom_vs_Tu_hom	ENSDARG00000008548	arhgap12a	0.000220966	0.173005
deseq2-2_32000001_33000000	AB_hom_vs_Tu_hom	ENSDARG00000038898	zgc:113691	0.000269207	-1.45271
deseq2-2_32000001_33000000	AB_hom_vs_Tu_hom	ENSDARG00000008784	prpf4ba	0.000288069	-0.245765
deseq2-2_32000001_33000000	AB_hom_vs_Tu_hom	ENSDARG00000038742	rbp1.2	0.000318292	-0.998302
deseq2-2_32000001_33000000	AB_hom_vs_Tu_hom	ENSDARG00000117380	LO017954.1	0.000344066	-0.671124
deseq2-2_32000001_33000000	AB_hom_vs_Tu_hom	ENSDARG00000086990	carmil3	0.000400356	0.217951
deseq2-2_32000001_33000000	AB_hom_vs_Tu_hom	ENSDARG00000074435	ttc19	0.000455471	0.210815
deseq2-2_32000001_33000000	AB_hom_vs_Tu_hom	ENSDARG00000088423	si:ch211-66k16.28	0.00075534	-0.478043
deseq2-2_32000001_33000000	AB_hom_vs_Tu_hom	ENSDARG00000097253	yeats2	0.000776117	-0.371518
deseq2-2_32000001_33000000	AB_hom_vs_Tu_hom	ENSDARG00000054170	ltb4r2b	0.000880147	-0.714465
deseq2-2_32000001_33000000	AB_hom_vs_Tu_hom	ENSDARG00000061196	emilin2a	0.000926335	-0.68261
deseq2-2_32000001_33000000	AB_hom_vs_Tu_hom	ENSDARG00000093150	fndc7rs3	0.0016084	0.696899
deseq2-2_32000001_33000000	AB_hom_vs_Tu_hom	ENSDARG00000079727	selenop2	0.00196722	0.509355
deseq2-2_32000001_33000000	AB_hom_vs_Tu_hom	ENSDARG00000053318	lrrc6	0.00210568	-0.578676
deseq2-2_32000001_33000000	AB_hom_vs_Tu_hom	ENSDARG00000038713	tep1	0.00325253	-0.460159
deseq2-2_32000001_33000000	AB_hom_vs_Tu_hom	ENSDARG00000011600	epha4b	0.00352611	-0.252853
deseq2-2_32000001_33000000	AB_hom_vs_Tu_hom	ENSDARG00000014209	odf3l2a	0.00405411	0.534776
deseq2-2_32000001_33000000	AB_hom_vs_Tu_hom	ENSDARG00000113756	RF00001	0.00405411	-2.37597
deseq2-2_32000001_33000000	AB_hom_vs_Tu_hom	ENSDARG00000079202	parp2	0.00499897	0.314851
deseq2-2_32000001_33000000	AB_hom_vs_Tu_hom	ENSDARG00000054162	nfatc4	0.00604957	-0.399859
deseq2-2_32000001_33000000	AB_hom_vs_Tu_hom	ENSDARG00000008191	tmeff1a	0.00618415	-0.385933
deseq2-2_32000001_33000000	AB_hom_vs_Tu_hom	ENSDARG00000093932	ftr04	0.00670483	-2.26114
deseq2-2_32000001_33000000	AB_hom_vs_Tu_hom	ENSDARG00000044923	ube2w	0.00747291	0.230224
deseq2-2_32000001_33000000	AB_hom_vs_Tu_hom	ENSDARG00000000324	dcaf8	0.0100655	-0.174341
deseq2-2_32000001_33000000	AB_hom_vs_Tu_hom	ENSDARG00000079784	si:ch211-235o23.1	0.0102462	-0.256978
deseq2-2_32000001_33000000	AB_hom_vs_Tu_hom	ENSDARG00000021739	klhl24a	0.0163252	0.31263
deseq2-2_32000001_33000000	AB_hom_vs_Tu_hom	ENSDARG00000025593	plekhj1	0.0171262	0.202639
deseq2-2_32000001_33000000	AB_hom_vs_Tu_hom	ENSDARG00000068143	slc39a6	0.017283	-0.14399
deseq2-2_32000001_33000000	AB_hom_vs_Tu_hom	ENSDARG00000079537	ftr13	0.0174888	-0.75881
deseq2-2_32000001_33000000	AB_hom_vs_Tu_hom	ENSDARG00000016132	keap1a	0.0223336	-0.210951
deseq2-2_32000001_33000000	AB_hom_vs_Tu_hom	ENSDARG00000092469	fndc7rs1	0.0249408	0.578411
deseq2-2_32000001_33000000	AB_hom_vs_Tu_hom	ENSDARG00000032175	puf60a	0.0339981	-0.112561
deseq2-2_32000001_33000000	AB_hom_vs_Tu_hom	ENSDARG00000053358	basp1	0.0356957	-0.125657
deseq2-2_32000001_33000000	AB_hom_vs_Tu_hom	ENSDARG00000010816	slc7a14a	0.0356957	-0.163259
deseq2-2_32000001_33000000	AB_hom_vs_Tu_hom	ENSDARG00000038716	casq1a	0.0356957	-0.399537
deseq2-2_32000001_33000000	AB_hom_vs_Tu_hom	ENSDARG00000030254	cbln9	0.0382185	-0.36057
deseq2-2_32000001_33000000	AB_hom_vs_Tu_hom	ENSDARG00000055192	zgc:136930	0.0394063	0.320062
deseq2-2_32000001_33000000	AB_hom_vs_Tu_hom	ENSDARG00000078226	cdh12a	0.0472197	0.289516
deseq2-2_32000001_33000000	AB_hom_vs_Tu_hom	ENSDARG00000038905	hectd3	0.0491855	-0.122065
deseq2-2_32000001_33000000	AB_Tu_het_vs_Tu_hom	ENSDARG00000079589	si:dkeyp-73d8.6	1.94237e-53	-1.13397
deseq2-2_32000001_33000000	AB_Tu_het_vs_Tu_hom	ENSDARG00000076043	si:dkeyp-73d8.9	3.16964e-43	-0.913371
deseq2-2_32000001_33000000	AB_Tu_het_vs_Tu_hom	ENSDARG00000094045	si:dkeyp-73d8.8	4.22615e-19	2.94339
deseq2-2_32000001_33000000	AB_Tu_het_vs_Tu_hom	ENSDARG00000097911	CU179756.1	2.51306e-18	3.28072
deseq2-2_32000001_33000000	AB_Tu_het_vs_Tu_hom	ENSDARG00000079412	ftr02	6.55264e-18	1.88188
deseq2-2_32000001_33000000	AB_Tu_het_vs_Tu_hom	ENSDARG00000068431	si:ch211-195h23.3	8.7981e-18	1.65278
deseq2-2_32000001_33000000	AB_Tu_het_vs_Tu_hom	ENSDARG00000053155	alg3	2.32577e-09	0.389519
deseq2-2_32000001_33000000	AB_Tu_het_vs_Tu_hom	ENSDARG00000117510	CU302321.1	2.32577e-09	2.95101
deseq2-2_32000001_33000000	AB_Tu_het_vs_Tu_hom	ENSDARG00000017038	zgc:152670	2.19463e-07	2.22989
deseq2-2_32000001_33000000	AB_Tu_het_vs_Tu_hom	ENSDARG00000038585	eif4e2	2.38118e-07	0.343143
deseq2-2_32000001_33000000	AB_Tu_het_vs_Tu_hom	ENSDARG00000018077	rbp1.1	6.03186e-07	0.41374
deseq2-2_32000001_33000000	AB_Tu_het_vs_Tu_hom	ENSDARG00000031783	adcy8	3.05531e-06	-0.509095
deseq2-2_32000001_33000000	AB_Tu_het_vs_Tu_hom	ENSDARG00000011998	bfsp2	3.21781e-06	-0.194556
deseq2-2_32000001_33000000	AB_Tu_het_vs_Tu_hom	ENSDARG00000053366	ftr12	3.59278e-06	-1.11445
deseq2-2_32000001_33000000	AB_Tu_het_vs_Tu_hom	ENSDARG00000060637	clstn2	4.07563e-06	0.237009
deseq2-2_32000001_33000000	AB_Tu_het_vs_Tu_hom	ENSDARG00000054202	hbl4	5.19964e-06	0.780855
deseq2-2_32000001_33000000	AB_Tu_het_vs_Tu_hom	ENSDARG00000004880	acsm3	1.98565e-05	-0.32346
deseq2-2_32000001_33000000	AB_Tu_het_vs_Tu_hom	ENSDARG00000023157	cbln10	2.56101e-05	0.642652
deseq2-2_32000001_33000000	AB_Tu_het_vs_Tu_hom	ENSDARG00000038743	copb2	8.47233e-05	-0.171879
deseq2-2_32000001_33000000	AB_Tu_het_vs_Tu_hom	ENSDARG00000021398	mul1a	0.000617703	-0.290995
deseq2-2_32000001_33000000	AB_Tu_het_vs_Tu_hom	ENSDARG00000007553	opn4.1	0.00105862	-0.144265
deseq2-2_32000001_33000000	AB_Tu_het_vs_Tu_hom	ENSDARG00000003244	gbp3	0.00242573	0.244487
deseq2-2_32000001_33000000	AB_Tu_het_vs_Tu_hom	ENSDARG00000033451	atpsckmt	0.00299372	0.415902
deseq2-2_32000001_33000000	AB_Tu_het_vs_Tu_hom	ENSDARG00000099617	sdr39u1	0.00411138	-0.170411
deseq2-2_32000001_33000000	AB_Tu_het_vs_Tu_hom	ENSDARG00000053293	ftr14	0.00487306	-0.393001
deseq2-2_32000001_33000000	AB_Tu_het_vs_Tu_hom	ENSDARG00000079202	parp2	0.00487306	0.272471
deseq2-2_32000001_33000000	AB_Tu_het_vs_Tu_hom	ENSDARG00000068240	trim110	0.00717043	0.648562
deseq2-2_32000001_33000000	AB_Tu_het_vs_Tu_hom	ENSDARG00000100813	nudt12	0.00728737	-0.196068
deseq2-2_32000001_33000000	AB_Tu_het_vs_Tu_hom	ENSDARG00000092813	fndc7rs4	0.00739627	0.282187
deseq2-2_32000001_33000000	AB_Tu_het_vs_Tu_hom	ENSDARG00000010583	pard3ab	0.00739627	-0.159353
deseq2-2_32000001_33000000	AB_Tu_het_vs_Tu_hom	ENSDARG00000103889	mettl17	0.0131755	0.173559
deseq2-2_32000001_33000000	AB_Tu_het_vs_Tu_hom	ENSDARG00000092181	im:7140055	0.0145161	0.17635
deseq2-2_32000001_33000000	AB_Tu_het_vs_Tu_hom	ENSDARG00000086393	dbx1a	0.0145161	0.288229
deseq2-2_32000001_33000000	AB_Tu_het_vs_Tu_hom	ENSDARG00000001721	oc90	0.0166041	0.670338
deseq2-2_32000001_33000000	AB_Tu_het_vs_Tu_hom	ENSDARG00000021022	ift57	0.0174238	-0.210558
deseq2-2_32000001_33000000	AB_Tu_het_vs_Tu_hom	ENSDARG00000079605	prmt5	0.0218042	0.182225
deseq2-2_32000001_33000000	AB_Tu_het_vs_Tu_hom	ENSDARG00000079784	si:ch211-235o23.1	0.0236248	-0.20779
deseq2-2_32000001_33000000	AB_Tu_het_vs_Tu_hom	ENSDARG00000098820	ftr67	0.0282896	-0.185639
deseq2-2_32000001_33000000	AB_Tu_het_vs_Tu_hom	ENSDARG00000102729	SAMD9	0.0305044	-1.13134
deseq2-2_32000001_33000000	AB_Tu_het_vs_Tu_hom	ENSDARG00000091280	si:ch211-66k16.27	0.0352675	-0.506151
deseq2-2_32000001_33000000	AB_Tu_het_vs_Tu_hom	ENSDARG00000038894	tmx3a	0.0363548	0.178223
deseq2-2_32000001_33000000	AB_Tu_het_vs_Tu_hom	ENSDARG00000102887	abhd4	0.0363548	-0.163661
deseq2-2_32000001_33000000	AB_Tu_het_vs_Tu_hom	ENSDARG00000025593	plekhj1	0.0363548	0.165146
deseq2-2_32000001_33000000	AB_Tu_het_vs_Tu_hom	ENSDARG00000075886	vwa5b2	0.0378914	-0.411438
deseq2-2_32000001_33000000	AB_Tu_het_vs_Tu_hom	ENSDARG00000042613	crp3	0.0378914	-0.387605
deseq2-2_32000001_33000000	AB_Tu_het_vs_Tu_hom	ENSDARG00000038826	jph1b	0.0397416	-0.183433
deseq2-2_32000001_33000000	AB_Tu_het_vs_Tu_hom	ENSDARG00000105141	FO704635.1	0.0414657	-0.425024
deseq2-2_32000001_33000000	AB_Tu_het_vs_Tu_hom	ENSDARG00000117627	CR925737.1	0.0461846	0.412216
deseq2-2_32000001_33000000	AB_Tu_het_vs_Tu_hom	ENSDARG00000091628	cspp1b	0.049576	0.198582
deseq2-2_32000001_33000000	AB_Tu_het_vs_Tu_hom	ENSDARG00000038905	hectd3	0.049576	-0.10299
deseq2-2_32000001_33000000	AB_Tu_het_vs_Tu_hom	ENSDARG00000055192	zgc:136930	0.049576	0.267057
deseq2-5_37000001_38000000	AB_Tu_het_vs_AB_hom	ENSDARG00000035338	tppp2	1.6934e-16	0.38784
deseq2-5_37000001_38000000	AB_Tu_het_vs_AB_hom	ENSDARG00000098373	BX276102.1	7.65814e-08	2.39466
deseq2-5_37000001_38000000	AB_Tu_het_vs_AB_hom	ENSDARG00000100476	si:dkeyp-110c7.4	8.75787e-06	0.306356
deseq2-5_37000001_38000000	AB_Tu_het_vs_AB_hom	ENSDARG00000052734	hmgcra	0.0003313	0.582594
deseq2-5_37000001_38000000	AB_Tu_het_vs_AB_hom	ENSDARG00000051916	cdk7	0.000785749	-0.221017
deseq2-5_37000001_38000000	AB_Tu_het_vs_AB_hom	ENSDARG00000013730	slc4a4a	0.00126369	-0.128369
deseq2-5_37000001_38000000	AB_Tu_het_vs_AB_hom	ENSDARG00000008912	slc8a2a	0.00145249	0.363506
deseq2-5_37000001_38000000	AB_Tu_het_vs_AB_hom	ENSDARG00000024325	col4a3bpa	0.00274898	0.229034
deseq2-5_37000001_38000000	AB_Tu_het_vs_AB_hom	ENSDARG00000015937	kptn	0.0043894	0.202672
deseq2-5_37000001_38000000	AB_Tu_het_vs_AB_hom	ENSDARG00000099679	tent2	0.00478386	0.167369
deseq2-5_37000001_38000000	AB_Tu_het_vs_AB_hom	ENSDARG00000095136	si:ch211-130m23.2	0.0106478	0.613155
deseq2-5_37000001_38000000	AB_Tu_het_vs_AB_hom	ENSDARG00000067664	si:dkey-172m14.2	0.0111402	0.611565
deseq2-5_37000001_38000000	AB_Tu_het_vs_AB_hom	ENSDARG00000007465	tdrd1	0.0259656	0.53045
deseq2-5_37000001_38000000	AB_Tu_het_vs_AB_hom	ENSDARG00000039929	ckmt2b	0.0304415	-0.134142
deseq2-5_37000001_38000000	AB_Tu_het_vs_AB_hom	ENSDARG00000001414	mctp2a	0.0492002	0.332557
deseq2-5_37000001_38000000	AB_hom_vs_Tu_hom	ENSDARG00000035338	tppp2	1.61308e-36	-0.746222
deseq2-5_37000001_38000000	AB_hom_vs_Tu_hom	ENSDARG00000035438	myhc4	1.0856e-17	5.3065
deseq2-5_37000001_38000000	AB_hom_vs_Tu_hom	ENSDARG00000052693	si:dkey-172m14.1	7.73977e-11	0.737769
deseq2-5_37000001_38000000	AB_hom_vs_Tu_hom	ENSDARG00000098373	BX276102.1	1.33894e-10	-3.23135
deseq2-5_37000001_38000000	AB_hom_vs_Tu_hom	ENSDARG00000013730	slc4a4a	9.53762e-09	0.248626
deseq2-5_37000001_38000000	AB_hom_vs_Tu_hom	ENSDARG00000008912	slc8a2a	5.10457e-08	-0.639064
deseq2-5_37000001_38000000	AB_hom_vs_Tu_hom	ENSDARG00000099679	tent2	9.16716e-08	-0.321793
deseq2-5_37000001_38000000	AB_hom_vs_Tu_hom	ENSDARG00000116863	CU984579.1	5.98274e-07	-0.75142
deseq2-5_37000001_38000000	AB_hom_vs_Tu_hom	ENSDARG00000035018	thy1	7.414e-07	-0.990492
deseq2-5_37000001_38000000	AB_hom_vs_Tu_hom	ENSDARG00000015937	kptn	7.414e-07	-0.363756
deseq2-5_37000001_38000000	AB_hom_vs_Tu_hom	ENSDARG00000060012	f2r	2.26896e-06	-1.15204
deseq2-5_37000001_38000000	AB_hom_vs_Tu_hom	ENSDARG00000100476	si:dkeyp-110c7.4	4.98015e-06	-0.4127
deseq2-5_37000001_38000000	AB_hom_vs_Tu_hom	ENSDARG00000067664	si:dkey-172m14.2	0.00413368	-0.860683
deseq2-5_37000001_38000000	AB_hom_vs_Tu_hom	ENSDARG00000101759	homer1b	0.00448654	-0.208159
deseq2-5_37000001_38000000	AB_hom_vs_Tu_hom	ENSDARG00000101479	BX908782.2	0.00776594	-1.77838
deseq2-5_37000001_38000000	AB_hom_vs_Tu_hom	ENSDARG00000095142	si:ch211-208h16.4	0.0159101	-0.616337
deseq2-5_37000001_38000000	AB_hom_vs_Tu_hom	ENSDARG00000067981	zgc:103697	0.0164219	0.23643
deseq2-5_37000001_38000000	AB_hom_vs_Tu_hom	ENSDARG00000035325	srsf7a	0.0168087	-0.178933
deseq2-5_37000001_38000000	AB_hom_vs_Tu_hom	ENSDARG00000034368	hexb	0.018436	0.255252
deseq2-5_37000001_38000000	AB_hom_vs_Tu_hom	ENSDARG00000024693	lysmd3	0.018436	-0.234022
deseq2-5_37000001_38000000	AB_hom_vs_Tu_hom	ENSDARG00000051916	cdk7	0.0256202	0.25894
deseq2-5_37000001_38000000	AB_hom_vs_Tu_hom	ENSDARG00000009939	micu2	0.0360516	-0.268826
deseq2-5_37000001_38000000	AB_hom_vs_Tu_hom	ENSDARG00000108939	FQ378016.1	0.0384406	-1.12409
deseq2-5_37000001_38000000	AB_hom_vs_Tu_hom	ENSDARG00000051890	hp	0.0384406	-2.02671
deseq2-5_37000001_38000000	AB_hom_vs_Tu_hom	ENSDARG00000011239	ppp1r14aa	0.0384406	-0.227589
deseq2-5_37000001_38000000	AB_hom_vs_Tu_hom	ENSDARG00000052734	hmgcra	0.0483618	-0.609264
deseq2-5_37000001_38000000	AB_hom_vs_Tu_hom	ENSDARG00000090352	CR855311.1	0.0486489	-1.29197
deseq2-5_37000001_38000000	AB_hom_vs_Tu_hom	ENSDARG00000008414	exoc3l2a	0.0486489	-0.382433
deseq2-5_37000001_38000000	AB_Tu_het_vs_Tu_hom	ENSDARG00000035438	myhc4	7.36372e-16	4.5717
deseq2-5_37000001_38000000	AB_Tu_het_vs_Tu_hom	ENSDARG00000035338	tppp2	2.5147e-09	-0.358381
deseq2-5_37000001_38000000	AB_Tu_het_vs_Tu_hom	ENSDARG00000052693	si:dkey-172m14.1	0.000247411	0.480862
deseq2-5_37000001_38000000	AB_Tu_het_vs_Tu_hom	ENSDARG00000035018	thy1	0.00154815	-0.719209
deseq2-18_7000001_19000000	AB_Tu_het_vs_AB_hom	ENSDARG00000113320	si:dkey-88n24.5	8.06564e-44	2.84694
deseq2-18_7000001_19000000	AB_Tu_het_vs_AB_hom	ENSDARG00000058857	zgc:112052	1.8731e-42	-0.430057
deseq2-18_7000001_19000000	AB_Tu_het_vs_AB_hom	ENSDARG00000068814	spata2l	5.31252e-34	1.26578
deseq2-18_7000001_19000000	AB_Tu_het_vs_AB_hom	ENSDARG00000094719	CR318588.3	9.2136e-27	1.00121
deseq2-18_7000001_19000000	AB_Tu_het_vs_AB_hom	ENSDARG00000041623	mt2	2.95597e-20	0.727877
deseq2-18_7000001_19000000	AB_Tu_het_vs_AB_hom	ENSDARG00000063186	si:ch211-220f12.4	1.85018e-14	0.77845
deseq2-18_7000001_19000000	AB_Tu_het_vs_AB_hom	ENSDARG00000069038	si:ch211-242e8.1	6.91425e-14	0.461311
deseq2-18_7000001_19000000	AB_Tu_het_vs_AB_hom	ENSDARG00000062821	slc6a15	3.53932e-13	0.413955
deseq2-18_7000001_19000000	AB_Tu_het_vs_AB_hom	ENSDARG00000092833	CR318588.2	1.84827e-12	3.35247
deseq2-18_7000001_19000000	AB_Tu_het_vs_AB_hom	ENSDARG00000034001	tango6	2.87524e-11	0.377477
deseq2-18_7000001_19000000	AB_Tu_het_vs_AB_hom	ENSDARG00000062756	pllp	3.06148e-10	0.543292
deseq2-18_7000001_19000000	AB_Tu_het_vs_AB_hom	ENSDARG00000058345	si:dkey-5i3.5	3.32829e-07	-0.396062
deseq2-18_7000001_19000000	AB_Tu_het_vs_AB_hom	ENSDARG00000095556	CR318588.4	3.39034e-07	-0.447697
deseq2-18_7000001_19000000	AB_Tu_het_vs_AB_hom	ENSDARG00000068947	si:ch211-264e16.1	2.17365e-06	2.32633
deseq2-18_7000001_19000000	AB_Tu_het_vs_AB_hom	ENSDARG00000073752	CACNA2D1	6.53827e-06	0.528463
deseq2-18_7000001_19000000	AB_Tu_het_vs_AB_hom	ENSDARG00000068876	zgc:153031	3.42736e-05	-0.243005
deseq2-18_7000001_19000000	AB_Tu_het_vs_AB_hom	ENSDARG00000111261	FO834850.1	0.00134178	-0.192906
deseq2-18_7000001_19000000	AB_Tu_het_vs_AB_hom	ENSDARG00000063167	chkb	0.00204323	0.23645
deseq2-18_7000001_19000000	AB_Tu_het_vs_AB_hom	ENSDARG00000094415	si:ch211-264e16.2	0.00666136	2.04617
deseq2-18_7000001_19000000	AB_Tu_het_vs_AB_hom	ENSDARG00000101630	si:dkey-8l13.5	0.0103127	-0.418875
deseq2-18_7000001_19000000	AB_Tu_het_vs_AB_hom	ENSDARG00000092233	vtg1	0.0219629	3.28469
deseq2-18_7000001_19000000	AB_Tu_het_vs_AB_hom	ENSDARG00000040633	PRMT8	0.0271534	-0.282388
deseq2-18_7000001_19000000	AB_Tu_het_vs_AB_hom	ENSDARG00000041569	ces2	0.0280752	0.303587
deseq2-18_7000001_19000000	AB_Tu_het_vs_AB_hom	ENSDARG00000042188	ttc38	0.0303807	-0.263799
deseq2-18_7000001_19000000	AB_Tu_het_vs_AB_hom	ENSDARG00000063293	neto2b	0.039855	0.275535
deseq2-18_7000001_19000000	AB_Tu_het_vs_AB_hom	ENSDARG00000057167	eif4g2b	0.0411142	-0.0902703
deseq2-18_7000001_19000000	AB_Tu_het_vs_AB_hom	ENSDARG00000093282	CR786582.1	0.047005	-0.981518
deseq2-18_7000001_19000000	AB_Tu_het_vs_AB_hom	ENSDARG00000025299	tspan9a	0.047005	0.298792
deseq2-18_7000001_19000000	AB_Tu_het_vs_AB_hom	ENSDARG00000078094	lmf2a	0.0499754	0.247775
deseq2-18_7000001_19000000	AB_hom_vs_Tu_hom	ENSDARG00000058857	zgc:112052	2.67437e-146	0.972983
deseq2-18_7000001_19000000	AB_hom_vs_Tu_hom	ENSDARG00000113320	si:dkey-88n24.5	1.37594e-72	-3.66623
deseq2-18_7000001_19000000	AB_hom_vs_Tu_hom	ENSDARG00000068814	spata2l	1.56226e-70	-1.89929
deseq2-18_7000001_19000000	AB_hom_vs_Tu_hom	ENSDARG00000041623	mt2	5.60635e-63	-1.42794
deseq2-18_7000001_19000000	AB_hom_vs_Tu_hom	ENSDARG00000094719	CR318588.3	2.46312e-51	-1.56798
deseq2-18_7000001_19000000	AB_hom_vs_Tu_hom	ENSDARG00000095556	CR318588.4	6.13232e-48	1.23258
deseq2-18_7000001_19000000	AB_hom_vs_Tu_hom	ENSDARG00000063186	si:ch211-220f12.4	1.17866e-42	-1.41617
deseq2-18_7000001_19000000	AB_hom_vs_Tu_hom	ENSDARG00000069038	si:ch211-242e8.1	1.6046e-40	-0.860101
deseq2-18_7000001_19000000	AB_hom_vs_Tu_hom	ENSDARG00000034001	tango6	4.26174e-36	-0.711021
deseq2-18_7000001_19000000	AB_hom_vs_Tu_hom	ENSDARG00000062821	slc6a15	1.00449e-33	-0.724152
deseq2-18_7000001_19000000	AB_hom_vs_Tu_hom	ENSDARG00000111261	FO834850.1	1.00103e-31	0.586687
deseq2-18_7000001_19000000	AB_hom_vs_Tu_hom	ENSDARG00000062756	pllp	3.75454e-31	-1.01246
deseq2-18_7000001_19000000	AB_hom_vs_Tu_hom	ENSDARG00000068876	zgc:153031	8.78138e-29	0.610018
deseq2-18_7000001_19000000	AB_hom_vs_Tu_hom	ENSDARG00000058345	si:dkey-5i3.5	8.34067e-24	0.837034
deseq2-18_7000001_19000000	AB_hom_vs_Tu_hom	ENSDARG00000068947	si:ch211-264e16.1	5.82947e-18	-3.89628
deseq2-18_7000001_19000000	AB_hom_vs_Tu_hom	ENSDARG00000073752	CACNA2D1	1.81019e-17	-0.927059
deseq2-18_7000001_19000000	AB_hom_vs_Tu_hom	ENSDARG00000092833	CR318588.2	9.384e-17	-4.34943
deseq2-18_7000001_19000000	AB_hom_vs_Tu_hom	ENSDARG00000093282	CR786582.1	3.16702e-16	4.13973
deseq2-18_7000001_19000000	AB_hom_vs_Tu_hom	ENSDARG00000062558	rspry1	1.93299e-15	-0.277486
deseq2-18_7000001_19000000	AB_hom_vs_Tu_hom	ENSDARG00000005972	ric8b	6.51457e-14	0.367917
deseq2-18_7000001_19000000	AB_hom_vs_Tu_hom	ENSDARG00000101630	si:dkey-8l13.5	2.65772e-13	0.981979
deseq2-18_7000001_19000000	AB_hom_vs_Tu_hom	ENSDARG00000069037	akip1	1.32821e-12	0.874544
deseq2-18_7000001_19000000	AB_hom_vs_Tu_hom	ENSDARG00000042188	ttc38	3.42276e-12	0.58905
deseq2-18_7000001_19000000	AB_hom_vs_Tu_hom	ENSDARG00000057167	eif4g2b	9.20858e-12	0.197897
deseq2-18_7000001_19000000	AB_hom_vs_Tu_hom	ENSDARG00000063167	chkb	9.80505e-12	-0.43397
deseq2-18_7000001_19000000	AB_hom_vs_Tu_hom	ENSDARG00000025299	tspan9a	3.19604e-11	-0.625197
deseq2-18_7000001_19000000	AB_hom_vs_Tu_hom	ENSDARG00000063332	shank3a	3.27263e-11	-0.427559
deseq2-18_7000001_19000000	AB_hom_vs_Tu_hom	ENSDARG00000063293	neto2b	3.44253e-10	-0.54716
deseq2-18_7000001_19000000	AB_hom_vs_Tu_hom	ENSDARG00000063026	mlc1	9.46014e-09	-0.38634
deseq2-18_7000001_19000000	AB_hom_vs_Tu_hom	ENSDARG00000017369	sema3d	2.64764e-08	-0.368789
deseq2-18_7000001_19000000	AB_hom_vs_Tu_hom	ENSDARG00000041569	ces2	3.41927e-08	-0.549567
deseq2-18_7000001_19000000	AB_hom_vs_Tu_hom	ENSDARG00000041581	znf143b	3.60508e-08	0.260376
deseq2-18_7000001_19000000	AB_hom_vs_Tu_hom	ENSDARG00000041791	mgat4c	4.8752e-08	-0.568444
deseq2-18_7000001_19000000	AB_hom_vs_Tu_hom	ENSDARG00000062915	polr3b	7.03894e-08	-0.24048
deseq2-18_7000001_19000000	AB_hom_vs_Tu_hom	ENSDARG00000058003	wfdc1	8.9773e-08	-0.536442
deseq2-18_7000001_19000000	AB_hom_vs_Tu_hom	ENSDARG00000013950	pdf	9.58368e-08	-0.510774
deseq2-18_7000001_19000000	AB_hom_vs_Tu_hom	ENSDARG00000092862	si:ch211-260p9.3	1.44693e-07	-1.21603
deseq2-18_7000001_19000000	AB_hom_vs_Tu_hom	ENSDARG00000097158	BX294100.1	2.05819e-07	0.96187
deseq2-18_7000001_19000000	AB_hom_vs_Tu_hom	ENSDARG00000054864	aplp2	7.81901e-07	-0.242089
deseq2-18_7000001_19000000	AB_hom_vs_Tu_hom	ENSDARG00000069168	si:dkey-73n10.1	2.0457e-06	-0.324406
deseq2-18_7000001_19000000	AB_hom_vs_Tu_hom	ENSDARG00000094415	si:ch211-264e16.2	3.17486e-06	-2.70973
deseq2-18_7000001_19000000	AB_hom_vs_Tu_hom	ENSDARG00000063361	si:ch211-1e14.1	9.17568e-06	-0.437051
deseq2-18_7000001_19000000	AB_hom_vs_Tu_hom	ENSDARG00000030872	cetp	9.8996e-06	-0.774959
deseq2-18_7000001_19000000	AB_hom_vs_Tu_hom	ENSDARG00000069122	si:ch211-216l23.2	1.36287e-05	0.214466
deseq2-18_7000001_19000000	AB_hom_vs_Tu_hom	ENSDARG00000062483	lyve1b	1.45774e-05	-0.42871
deseq2-18_7000001_19000000	AB_hom_vs_Tu_hom	ENSDARG00000095058	CT025776.1	1.80848e-05	-1.97712
deseq2-18_7000001_19000000	AB_hom_vs_Tu_hom	ENSDARG00000033020	ppcdc	4.79229e-05	0.457766
deseq2-18_7000001_19000000	AB_hom_vs_Tu_hom	ENSDARG00000040633	PRMT8	5.71489e-05	0.422007
deseq2-18_7000001_19000000	AB_hom_vs_Tu_hom	ENSDARG00000062824	alx1	5.71489e-05	0.379907
deseq2-18_7000001_19000000	AB_hom_vs_Tu_hom	ENSDARG00000004529	zgc:173742	0.000112301	0.671024
deseq2-18_7000001_19000000	AB_hom_vs_Tu_hom	ENSDARG00000010745	dnaja2b	0.00015006	-0.160448
deseq2-18_7000001_19000000	AB_hom_vs_Tu_hom	ENSDARG00000040100	si:dkey-95h12.1	0.000210154	-0.614042
deseq2-18_7000001_19000000	AB_hom_vs_Tu_hom	ENSDARG00000062893	si:dkey-103i16.6	0.000360878	0.407946
deseq2-18_7000001_19000000	AB_hom_vs_Tu_hom	ENSDARG00000093117	si:dkey-266m15.7	0.000361307	0.813137
deseq2-18_7000001_19000000	AB_hom_vs_Tu_hom	ENSDARG00000041951	selenoo1	0.000471892	0.262562
deseq2-18_7000001_19000000	AB_hom_vs_Tu_hom	ENSDARG00000016038	hacd3	0.000493892	-0.252919
deseq2-18_7000001_19000000	AB_hom_vs_Tu_hom	ENSDARG00000078094	lmf2a	0.000721776	-0.337742
deseq2-18_7000001_19000000	AB_hom_vs_Tu_hom	ENSDARG00000069027	admb	0.000771468	-0.345505
deseq2-18_7000001_19000000	AB_hom_vs_Tu_hom	ENSDARG00000034941	si:dkey-224e22.2	0.0011175	-0.433475
deseq2-18_7000001_19000000	AB_hom_vs_Tu_hom	ENSDARG00000099487	si:ch73-233f7.7	0.00115852	-0.658957
deseq2-18_7000001_19000000	AB_hom_vs_Tu_hom	ENSDARG00000057698	ctsd	0.00224394	0.189799
deseq2-18_7000001_19000000	AB_hom_vs_Tu_hom	ENSDARG00000042021	mapk12a	0.00250244	0.239209
deseq2-18_7000001_19000000	AB_hom_vs_Tu_hom	ENSDARG00000062964	si:dkey-246g23.2	0.00407537	0.527288
deseq2-18_7000001_19000000	AB_hom_vs_Tu_hom	ENSDARG00000112898	st3gal2	0.00637924	-0.310051
deseq2-18_7000001_19000000	AB_hom_vs_Tu_hom	ENSDARG00000026865	fam107b	0.00665654	-0.194183
deseq2-18_7000001_19000000	AB_hom_vs_Tu_hom	ENSDARG00000007461	srgap1a	0.00665654	-0.237322
deseq2-18_7000001_19000000	AB_hom_vs_Tu_hom	ENSDARG00000069654	ppp6r2b	0.0148662	-0.347449
deseq2-18_7000001_19000000	AB_hom_vs_Tu_hom	ENSDARG00000024631	nlrc5	0.0159578	1.20624
deseq2-18_7000001_19000000	AB_hom_vs_Tu_hom	ENSDARG00000075343	csf1a	0.0173419	-0.28463
deseq2-18_7000001_19000000	AB_hom_vs_Tu_hom	ENSDARG00000093781	lrriq1	0.0173419	0.327437
deseq2-18_7000001_19000000	AB_hom_vs_Tu_hom	ENSDARG00000041631	fam192a	0.0230265	0.153552
deseq2-18_7000001_19000000	AB_hom_vs_Tu_hom	ENSDARG00000102234	si:ch211-71n6.4	0.0246863	-0.412237
deseq2-18_7000001_19000000	AB_hom_vs_Tu_hom	ENSDARG00000114099	trim35-30	0.0313699	-0.790654
deseq2-18_7000001_19000000	AB_hom_vs_Tu_hom	ENSDARG00000058966	zgc:112332	0.0371665	-0.222045
deseq2-18_7000001_19000000	AB_Tu_het_vs_Tu_hom	ENSDARG00000058857	zgc:112052	4.36043e-51	0.542926
deseq2-18_7000001_19000000	AB_Tu_het_vs_Tu_hom	ENSDARG00000095556	CR318588.4	6.22876e-23	0.784882
deseq2-18_7000001_19000000	AB_Tu_het_vs_Tu_hom	ENSDARG00000041623	mt2	8.14224e-18	-0.700063
deseq2-18_7000001_19000000	AB_Tu_het_vs_Tu_hom	ENSDARG00000113320	si:dkey-88n24.5	5.34231e-16	-0.819295
deseq2-18_7000001_19000000	AB_Tu_het_vs_Tu_hom	ENSDARG00000111261	FO834850.1	5.34231e-16	0.393781
deseq2-18_7000001_19000000	AB_Tu_het_vs_Tu_hom	ENSDARG00000068814	spata2l	2.6814e-13	-0.633513
deseq2-18_7000001_19000000	AB_Tu_het_vs_Tu_hom	ENSDARG00000068876	zgc:153031	2.15599e-11	0.367013
deseq2-18_7000001_19000000	AB_Tu_het_vs_Tu_hom	ENSDARG00000063186	si:ch211-220f12.4	5.00477e-11	-0.637715
deseq2-18_7000001_19000000	AB_Tu_het_vs_Tu_hom	ENSDARG00000069038	si:ch211-242e8.1	5.05984e-10	-0.39879
deseq2-18_7000001_19000000	AB_Tu_het_vs_Tu_hom	ENSDARG00000034001	tango6	8.05101e-10	-0.333544
deseq2-18_7000001_19000000	AB_Tu_het_vs_Tu_hom	ENSDARG00000062558	rspry1	1.12118e-08	-0.192044
deseq2-18_7000001_19000000	AB_Tu_het_vs_Tu_hom	ENSDARG00000093282	CR786582.1	1.35423e-08	3.15821
deseq2-18_7000001_19000000	AB_Tu_het_vs_Tu_hom	ENSDARG00000062756	pllp	1.01266e-07	-0.469165
deseq2-18_7000001_19000000	AB_Tu_het_vs_Tu_hom	ENSDARG00000094719	CR318588.3	3.51109e-07	-0.56677
deseq2-18_7000001_19000000	AB_Tu_het_vs_Tu_hom	ENSDARG00000062821	slc6a15	8.19952e-07	-0.310197
deseq2-18_7000001_19000000	AB_Tu_het_vs_Tu_hom	ENSDARG00000005972	ric8b	1.46979e-06	0.242168
deseq2-18_7000001_19000000	AB_Tu_het_vs_Tu_hom	ENSDARG00000058345	si:dkey-5i3.5	2.37277e-06	0.440972
deseq2-18_7000001_19000000	AB_Tu_het_vs_Tu_hom	ENSDARG00000069037	akip1	1.97972e-05	0.581174
deseq2-18_7000001_19000000	AB_Tu_het_vs_Tu_hom	ENSDARG00000068947	si:ch211-264e16.1	0.000423581	-1.56995
deseq2-18_7000001_19000000	AB_Tu_het_vs_Tu_hom	ENSDARG00000101630	si:dkey-8l13.5	0.000717203	0.563104
deseq2-18_7000001_19000000	AB_Tu_het_vs_Tu_hom	ENSDARG00000063332	shank3a	0.00127514	-0.240893
deseq2-18_7000001_19000000	AB_Tu_het_vs_Tu_hom	ENSDARG00000042188	ttc38	0.00178133	0.325251
deseq2-18_7000001_19000000	AB_Tu_het_vs_Tu_hom	ENSDARG00000073752	CACNA2D1	0.00220888	-0.398596
deseq2-18_7000001_19000000	AB_Tu_het_vs_Tu_hom	ENSDARG00000057167	eif4g2b	0.00234702	0.107627
deseq2-18_7000001_19000000	AB_Tu_het_vs_Tu_hom	ENSDARG00000025299	tspan9a	0.0042788	-0.326405
deseq2-18_7000001_19000000	AB_Tu_het_vs_Tu_hom	ENSDARG00000017369	sema3d	0.00489385	-0.22403
deseq2-18_7000001_19000000	AB_Tu_het_vs_Tu_hom	ENSDARG00000097158	BX294100.1	0.0050592	0.652867
deseq2-18_7000001_19000000	AB_Tu_het_vs_Tu_hom	ENSDARG00000063026	mlc1	0.00671229	-0.222244
deseq2-18_7000001_19000000	AB_Tu_het_vs_Tu_hom	ENSDARG00000041581	znf143b	0.00693274	0.158731
deseq2-18_7000001_19000000	AB_Tu_het_vs_Tu_hom	ENSDARG00000041791	mgat4c	0.0110818	-0.330131
deseq2-18_7000001_19000000	AB_Tu_het_vs_Tu_hom	ENSDARG00000069122	si:ch211-216l23.2	0.0110818	0.149664
deseq2-18_7000001_19000000	AB_Tu_het_vs_Tu_hom	ENSDARG00000042021	mapk12a	0.0116172	0.204622
deseq2-18_7000001_19000000	AB_Tu_het_vs_Tu_hom	ENSDARG00000004529	zgc:173742	0.0117389	0.517093
deseq2-18_7000001_19000000	AB_Tu_het_vs_Tu_hom	ENSDARG00000062915	polr3b	0.0135056	-0.140434
deseq2-18_7000001_19000000	AB_Tu_het_vs_Tu_hom	ENSDARG00000043701	gpd1a	0.0217376	0.174615
deseq2-18_7000001_19000000	AB_Tu_het_vs_Tu_hom	ENSDARG00000063293	neto2b	0.0223363	-0.271625
deseq2-18_7000001_19000000	AB_Tu_het_vs_Tu_hom	ENSDARG00000058003	wfdc1	0.0234571	-0.306025
deseq2-18_7000001_19000000	AB_Tu_het_vs_Tu_hom	ENSDARG00000024631	nlrc5	0.0267322	1.12785
deseq2-18_7000001_19000000	AB_Tu_het_vs_Tu_hom	ENSDARG00000062483	lyve1b	0.0305353	-0.273474
deseq2-18_7000001_19000000	AB_Tu_het_vs_Tu_hom	ENSDARG00000033020	ppcdc	0.0379287	0.312639
deseq2-18_7000001_19000000	AB_Tu_het_vs_Tu_hom	ENSDARG00000063167	chkb	0.0382304	-0.197519
deseq2-18_7000001_19000000	AB_Tu_het_vs_Tu_hom	ENSDARG00000091851	tsen2	0.0490721	-0.245632
deseq2-12_9000001_10000000	AB_Tu_het_vs_AB_hom	ENSDARG00000104629	SLC16A6 (1 of many)	1.70839e-152	-9.04948
deseq2-12_9000001_10000000	AB_Tu_het_vs_AB_hom	ENSDARG00000062442	msrb1b	2.92617e-67	-2.03115
deseq2-12_9000001_10000000	AB_Tu_het_vs_AB_hom	ENSDARG00000033537	p4ha1a	9.67772e-56	0.646001
deseq2-12_9000001_10000000	AB_Tu_het_vs_AB_hom	ENSDARG00000102793	slc16a6a	4.30074e-49	0.979652
deseq2-12_9000001_10000000	AB_Tu_het_vs_AB_hom	ENSDARG00000101715	arsg	1.86416e-41	-1.14469
deseq2-12_9000001_10000000	AB_Tu_het_vs_AB_hom	ENSDARG00000055642	si:ch211-217a12.1	9.01373e-39	-0.744992
deseq2-12_9000001_10000000	AB_Tu_het_vs_AB_hom	ENSDARG00000075046	rnf151	9.01373e-39	-1.16137
deseq2-12_9000001_10000000	AB_Tu_het_vs_AB_hom	ENSDARG00000090537	ifit11	2.44406e-35	-4.15612
deseq2-12_9000001_10000000	AB_Tu_het_vs_AB_hom	ENSDARG00000096700	FP565451.1	1.23281e-30	-2.73516
deseq2-12_9000001_10000000	AB_Tu_het_vs_AB_hom	ENSDARG00000055128	armc4	1.95425e-27	-0.631562
deseq2-12_9000001_10000000	AB_Tu_het_vs_AB_hom	ENSDARG00000055291	rab18a	1.88044e-25	0.283233
deseq2-12_9000001_10000000	AB_Tu_het_vs_AB_hom	ENSDARG00000045153	slc16a8	1.88044e-25	-0.95012
deseq2-12_9000001_10000000	AB_Tu_het_vs_AB_hom	ENSDARG00000075340	med1	5.36742e-22	-0.286583
deseq2-12_9000001_10000000	AB_Tu_het_vs_AB_hom	ENSDARG00000062943	taco1	1.66338e-16	-0.924522
deseq2-12_9000001_10000000	AB_Tu_het_vs_AB_hom	ENSDARG00000104531	zcchc4	1.99596e-16	-0.467257
deseq2-12_9000001_10000000	AB_Tu_het_vs_AB_hom	ENSDARG00000027070	acbd4	8.87299e-16	-0.495991
deseq2-12_9000001_10000000	AB_Tu_het_vs_AB_hom	ENSDARG00000094504	plekha1b	1.78465e-15	0.465979
deseq2-12_9000001_10000000	AB_Tu_het_vs_AB_hom	ENSDARG00000074160	paqr4b	1.02232e-13	-0.635848
deseq2-12_9000001_10000000	AB_Tu_het_vs_AB_hom	ENSDARG00000100552	taco1	1.69434e-13	0.36897
deseq2-12_9000001_10000000	AB_Tu_het_vs_AB_hom	ENSDARG00000055569	ghdc	1.9695e-12	-0.465204
deseq2-12_9000001_10000000	AB_Tu_het_vs_AB_hom	ENSDARG00000100072	mgrn1a	1.97686e-12	0.235737
deseq2-12_9000001_10000000	AB_Tu_het_vs_AB_hom	ENSDARG00000079128	becn1	4.6599e-12	-0.208215
deseq2-12_9000001_10000000	AB_Tu_het_vs_AB_hom	ENSDARG00000095300	mxra7	1.04062e-11	-0.357092
deseq2-12_9000001_10000000	AB_Tu_het_vs_AB_hom	ENSDARG00000076980	ppp1r16a	1.15485e-11	-0.444514
deseq2-12_9000001_10000000	AB_Tu_het_vs_AB_hom	ENSDARG00000095409	si:ch211-226h7.8	1.71807e-11	1.95879
deseq2-12_9000001_10000000	AB_Tu_het_vs_AB_hom	ENSDARG00000113809	RF00001	2.21174e-11	-1.35205
deseq2-12_9000001_10000000	AB_Tu_het_vs_AB_hom	ENSDARG00000103261	CABZ01038699.1	5.90515e-10	1.03833
deseq2-12_9000001_10000000	AB_Tu_het_vs_AB_hom	ENSDARG00000045064	ablim1b	7.65962e-10	-0.189354
deseq2-12_9000001_10000000	AB_Tu_het_vs_AB_hom	ENSDARG00000058076	snf8	4.50749e-08	-0.207839
deseq2-12_9000001_10000000	AB_Tu_het_vs_AB_hom	ENSDARG00000074169	gpam	4.50749e-08	0.251855
deseq2-12_9000001_10000000	AB_Tu_het_vs_AB_hom	ENSDARG00000020041	vps35l	5.43175e-08	0.160445
deseq2-12_9000001_10000000	AB_Tu_het_vs_AB_hom	ENSDARG00000089369	fdxr	1.16251e-07	0.473954
deseq2-12_9000001_10000000	AB_Tu_het_vs_AB_hom	ENSDARG00000077900	si:ch211-141o9.10	2.12342e-07	-0.685012
deseq2-12_9000001_10000000	AB_Tu_het_vs_AB_hom	ENSDARG00000076196	si:ch211-226h7.6	3.57424e-07	1.69554
deseq2-12_9000001_10000000	AB_Tu_het_vs_AB_hom	ENSDARG00000040712	adprh	5.21421e-07	0.332392
deseq2-12_9000001_10000000	AB_Tu_het_vs_AB_hom	ENSDARG00000061990	kcnh4b	5.21421e-07	0.267978
deseq2-12_9000001_10000000	AB_Tu_het_vs_AB_hom	ENSDARG00000109276	CABZ01068367.1	5.21421e-07	0.306989
deseq2-12_9000001_10000000	AB_Tu_het_vs_AB_hom	ENSDARG00000056270	atpaf2	9.16725e-07	-0.245535
deseq2-12_9000001_10000000	AB_Tu_het_vs_AB_hom	ENSDARG00000055652	aclyb	9.40026e-07	0.285985
deseq2-12_9000001_10000000	AB_Tu_het_vs_AB_hom	ENSDARG00000076015	si:ch73-139e5.2	1.48344e-06	0.583822
deseq2-12_9000001_10000000	AB_Tu_het_vs_AB_hom	ENSDARG00000026840	arhgap23b	1.88486e-06	0.276659
deseq2-12_9000001_10000000	AB_Tu_het_vs_AB_hom	ENSDARG00000099933	ppa1a	9.24058e-06	0.566654
deseq2-12_9000001_10000000	AB_Tu_het_vs_AB_hom	ENSDARG00000101010	hpdl	1.52861e-05	0.752936
deseq2-12_9000001_10000000	AB_Tu_het_vs_AB_hom	ENSDARG00000014161	ercc4	3.25639e-05	0.227842
deseq2-12_9000001_10000000	AB_Tu_het_vs_AB_hom	ENSDARG00000075903	chadlb	3.38011e-05	-0.27854
deseq2-12_9000001_10000000	AB_Tu_het_vs_AB_hom	ENSDARG00000105570	crestin	6.12863e-05	2.00434
deseq2-12_9000001_10000000	AB_Tu_het_vs_AB_hom	ENSDARG00000056079	l3mbtl2	6.16014e-05	0.17664
deseq2-12_9000001_10000000	AB_Tu_het_vs_AB_hom	ENSDARG00000077409	cby1	9.48116e-05	-0.314471
deseq2-12_9000001_10000000	AB_Tu_het_vs_AB_hom	ENSDARG00000091535	ccser2b	0.000141235	-0.384824
deseq2-12_9000001_10000000	AB_Tu_het_vs_AB_hom	ENSDARG00000091768	dclre1a	0.000181642	0.291972
deseq2-12_9000001_10000000	AB_Tu_het_vs_AB_hom	ENSDARG00000045142	hbae5	0.00036095	0.987798
deseq2-12_9000001_10000000	AB_Tu_het_vs_AB_hom	ENSDARG00000117808	CABZ01068366.1	0.000361076	-0.538291
deseq2-12_9000001_10000000	AB_Tu_het_vs_AB_hom	ENSDARG00000003085	stambpl1	0.0010101	-0.161105
deseq2-12_9000001_10000000	AB_Tu_het_vs_AB_hom	ENSDARG00000089581	nhlrc2	0.0011441	0.18321
deseq2-12_9000001_10000000	AB_Tu_het_vs_AB_hom	ENSDARG00000045268	tectb	0.00191556	0.339242
deseq2-12_9000001_10000000	AB_Tu_het_vs_AB_hom	ENSDARG00000103789	tmem130	0.00236396	0.315908
deseq2-12_9000001_10000000	AB_Tu_het_vs_AB_hom	ENSDARG00000045190	ch25h	0.00270216	-1.0457
deseq2-12_9000001_10000000	AB_Tu_het_vs_AB_hom	ENSDARG00000026294	erbb2	0.00363819	-0.243839
deseq2-12_9000001_10000000	AB_Tu_het_vs_AB_hom	ENSDARG00000041323	csdc2a	0.00402688	0.150224
deseq2-12_9000001_10000000	AB_Tu_het_vs_AB_hom	ENSDARG00000095603	grid2ipb	0.00613363	-0.140788
deseq2-12_9000001_10000000	AB_Tu_het_vs_AB_hom	ENSDARG00000043814	st6galnac1.1	0.00624331	0.23101
deseq2-12_9000001_10000000	AB_Tu_het_vs_AB_hom	ENSDARG00000002298	ankrd22	0.00637004	-0.305449
deseq2-12_9000001_10000000	AB_Tu_het_vs_AB_hom	ENSDARG00000055679	mto1	0.00637004	0.141428
deseq2-12_9000001_10000000	AB_Tu_het_vs_AB_hom	ENSDARG00000079572	plcd3b	0.00648359	0.182803
deseq2-12_9000001_10000000	AB_Tu_het_vs_AB_hom	ENSDARG00000093182	eif2ak1	0.00717972	0.134331
deseq2-12_9000001_10000000	AB_Tu_het_vs_AB_hom	ENSDARG00000061864	hdlbpb	0.0109903	-0.129901
deseq2-12_9000001_10000000	AB_Tu_het_vs_AB_hom	ENSDARG00000007906	lrp2b	0.0111224	0.444764
deseq2-12_9000001_10000000	AB_Tu_het_vs_AB_hom	ENSDARG00000101969	CABZ01084347.1	0.0115294	0.479123
deseq2-12_9000001_10000000	AB_Tu_het_vs_AB_hom	ENSDARG00000029695	pgp	0.012474	-0.265474
deseq2-12_9000001_10000000	AB_Tu_het_vs_AB_hom	ENSDARG00000006811	sult1st6	0.0162801	-0.199448
deseq2-12_9000001_10000000	AB_Tu_het_vs_AB_hom	ENSDARG00000057531	pgap3	0.0301205	0.398676
deseq2-12_9000001_10000000	AB_Tu_het_vs_AB_hom	ENSDARG00000087102	si:ch1073-164k15.3	0.0440861	-0.712853
deseq2-12_9000001_10000000	AB_Tu_het_vs_AB_hom	ENSDARG00000043818	si:ch211-119c20.2	0.0446557	0.241053
deseq2-12_9000001_10000000	AB_Tu_het_vs_AB_hom	ENSDARG00000111997	npffr1	0.049366	-0.227872
deseq2-12_9000001_10000000	AB_Tu_het_vs_AB_hom	ENSDARG00000091836	casp7	0.049366	0.0854676
deseq2-12_9000001_10000000	AB_Tu_het_vs_AB_hom	ENSDARG00000103235	mfsd8	0.049366	0.1096
deseq2-23_9000001_12000000	AB_Tu_het_vs_Tu_hom	ENSDARG00000096527	BX548015.2	1.38739e-63	5.66426
deseq2-23_9000001_12000000	AB_Tu_het_vs_Tu_hom	ENSDARG00000058332	krt18a.2	4.95877e-14	0.546489
deseq2-23_9000001_12000000	AB_Tu_het_vs_Tu_hom	ENSDARG00000058381	zgc:171775	0.0022108	-0.20567
deseq2-23_9000001_12000000	AB_Tu_het_vs_Tu_hom	ENSDARG00000037773	rybpa	0.00612768	-0.124147
deseq2-17_7000001_8000000	AB_Tu_het_vs_AB_hom	ENSDARG00000027465	rmnd1	1.37871e-06	0.198483
deseq2-19_1_2000000	AB_Tu_het_vs_AB_hom	ENSDARG00000058830	zdhhc3b	0.000668136	0.301293
deseq2-19_1_2000000	AB_Tu_het_vs_AB_hom	ENSDARG00000059373	dnajc8	0.0277863	0.233277
deseq2-19_1_2000000	AB_hom_vs_Tu_hom	ENSDARG00000058830	zdhhc3b	5.83471e-24	-0.647183
deseq2-19_1_2000000	AB_hom_vs_Tu_hom	ENSDARG00000099747	CABZ01111953.1	6.23983e-15	0.381012
deseq2-19_1_2000000	AB_hom_vs_Tu_hom	ENSDARG00000036943	golph3l	1.29867e-11	-0.499967
deseq2-19_1_2000000	AB_hom_vs_Tu_hom	ENSDARG00000078912	si:ch73-24k9.2	1.30794e-11	-1.03906
deseq2-19_1_2000000	AB_hom_vs_Tu_hom	ENSDARG00000099438	CABZ01073736.1	6.588e-11	1.21652
deseq2-19_1_2000000	AB_hom_vs_Tu_hom	ENSDARG00000059373	dnajc8	1.19376e-10	-0.410917
deseq2-19_1_2000000	AB_hom_vs_Tu_hom	ENSDARG00000036944	ensaa	1.87064e-09	-0.539109
deseq2-19_1_2000000	AB_hom_vs_Tu_hom	ENSDARG00000099596	btd	9.59372e-09	-0.459252
deseq2-19_1_2000000	AB_hom_vs_Tu_hom	ENSDARG00000074505	mturn	2.71156e-06	0.444383
deseq2-19_1_2000000	AB_hom_vs_Tu_hom	ENSDARG00000024381	msto1	3.13077e-06	-0.324726
deseq2-19_1_2000000	AB_hom_vs_Tu_hom	ENSDARG00000042637	tert	0.000120645	-0.329572
deseq2-19_1_2000000	AB_hom_vs_Tu_hom	ENSDARG00000071251	ppp1r18	0.00251863	-0.252651
deseq2-19_1_2000000	AB_hom_vs_Tu_hom	ENSDARG00000029043	nupl2	0.00278026	-0.292948
deseq2-19_1_2000000	AB_hom_vs_Tu_hom	ENSDARG00000100821	scrt1a	0.00355302	0.193874
deseq2-19_1_2000000	AB_hom_vs_Tu_hom	ENSDARG00000076623	col14a1b	0.00986104	-0.289648
deseq2-19_1_2000000	AB_hom_vs_Tu_hom	ENSDARG00000100514	cfap20	0.0115961	-0.195918
deseq2-19_1_2000000	AB_hom_vs_Tu_hom	ENSDARG00000036942	gpd1c	0.0161491	0.218263
deseq2-19_1_2000000	AB_hom_vs_Tu_hom	ENSDARG00000014569	hnrnpr	0.0239816	0.172434
deseq2-19_1_2000000	AB_hom_vs_Tu_hom	ENSDARG00000063682	fhod3a	0.033167	-0.197268
deseq2-19_1_2000000	AB_hom_vs_Tu_hom	ENSDARG00000020176	zbtb22a	0.0490314	-0.268997
deseq2-19_1_2000000	AB_Tu_het_vs_Tu_hom	ENSDARG00000058830	zdhhc3b	0.000296387	-0.34589
deseq2-19_1_2000000	AB_Tu_het_vs_Tu_hom	ENSDARG00000099747	CABZ01111953.1	0.000360294	0.250367
deseq2-19_1_2000000	AB_Tu_het_vs_Tu_hom	ENSDARG00000099438	CABZ01073736.1	0.000951619	0.887911
deseq2-19_33000001_39000000	AB_Tu_het_vs_Tu_hom	ENSDARG00000102705	otud6b	3.05697e-42	0.464497
deseq2-19_33000001_39000000	AB_Tu_het_vs_Tu_hom	ENSDARG00000076296	triqk	3.54856e-13	-0.258677
deseq2-19_33000001_39000000	AB_Tu_het_vs_Tu_hom	ENSDARG00000098942	rp9	0.0254128	0.168444
deseq2-24_20000001_22000000	AB_Tu_het_vs_Tu_hom	ENSDARG00000045352	cst14a.2	1.68793e-29	-0.455531
deseq2-24_20000001_22000000	AB_Tu_het_vs_Tu_hom	ENSDARG00000073786	cmbl	1.68793e-29	0.559674
deseq2-24_20000001_22000000	AB_Tu_het_vs_Tu_hom	ENSDARG00000031637	pan3	5.31791e-24	0.189169
deseq2-24_20000001_22000000	AB_Tu_het_vs_Tu_hom	ENSDARG00000089919	si:ch211-161h7.8	7.21208e-09	-0.319912
deseq2-24_20000001_22000000	AB_Tu_het_vs_Tu_hom	ENSDARG00000058821	sema5a	2.63174e-06	-0.107301
deseq2-24_20000001_22000000	AB_Tu_het_vs_Tu_hom	ENSDARG00000032131	drd3	5.77544e-06	-0.336629
deseq2-24_20000001_22000000	AB_Tu_het_vs_Tu_hom	ENSDARG00000058352	acot9.1	1.19413e-05	-0.189607
deseq2-24_20000001_22000000	AB_Tu_het_vs_Tu_hom	ENSDARG00000077492	atp8a2	7.65063e-05	-0.10348
deseq2-24_20000001_22000000	AB_Tu_het_vs_Tu_hom	ENSDARG00000027851	ccdc191	0.000101624	-0.387854
deseq2-24_20000001_22000000	AB_Tu_het_vs_Tu_hom	ENSDARG00000076238	gramd1c	0.000806775	-0.234296
deseq2-24_20000001_22000000	AB_Tu_het_vs_Tu_hom	ENSDARG00000011573	abcb11a	0.00124286	-0.417443
deseq2-24_20000001_22000000	AB_Tu_het_vs_Tu_hom	ENSDARG00000041490	afp4	0.00697459	2.23169
deseq2-24_20000001_22000000	AB_Tu_het_vs_Tu_hom	ENSDARG00000027088	ptgdsb.1	0.0085315	0.181206
deseq2-24_20000001_22000000	AB_Tu_het_vs_Tu_hom	ENSDARG00000057504	si:dkey-202g17.3	0.015571	0.180163
deseq2-24_20000001_22000000	AB_Tu_het_vs_Tu_hom	ENSDARG00000004078	acsl4a	0.0163413	-0.193191
deseq2-24_20000001_22000000	AB_Tu_het_vs_Tu_hom	ENSDARG00000097929	BX005392.3	0.0217391	-0.693111
deseq2-24_20000001_22000000	AB_Tu_het_vs_Tu_hom	ENSDARG00000116986	zgc:172315	0.0217391	-0.454987
deseq2-24_20000001_22000000	AB_Tu_het_vs_Tu_hom	ENSDARG00000061231	tinagl1	0.0268158	-0.245209
deseq2-24_20000001_22000000	AB_Tu_het_vs_Tu_hom	ENSDARG00000102458	hip1rb	0.0268158	-0.137133
deseq2-24_20000001_22000000	AB_Tu_het_vs_Tu_hom	ENSDARG00000096505	si:ch73-103l1.2	0.03524	-0.354544
deseq2-24_20000001_22000000	AB_Tu_het_vs_Tu_hom	ENSDARG00000021895	disc1	0.03524	-0.286429
deseq2-24_20000001_22000000	AB_Tu_het_vs_Tu_hom	ENSDARG00000073764	si:ch211-113j14.1	0.0422463	-0.366671
deseq2-24_20000001_22000000	AB_Tu_het_vs_Tu_hom	ENSDARG00000012829	asah2	0.0493215	-0.295002
deseq2-15_37000001_39000000	AB_Tu_het_vs_AB_hom	ENSDARG00000091650	igflr1	2.20003e-105	3.29358
deseq2-15_37000001_39000000	AB_Tu_het_vs_AB_hom	ENSDARG00000039661	slc36a4	4.96306e-59	0.346064
deseq2-15_37000001_39000000	AB_Tu_het_vs_AB_hom	ENSDARG00000076819	nlrc8	1.85322e-54	0.944959
deseq2-15_37000001_39000000	AB_Tu_het_vs_AB_hom	ENSDARG00000068621	si:ch211-181d7.3	1.36736e-41	-6.4154
deseq2-15_37000001_39000000	AB_Tu_het_vs_AB_hom	ENSDARG00000091847	si:ch211-181d7.1	6.54421e-31	-6.44988
deseq2-15_37000001_39000000	AB_Tu_het_vs_AB_hom	ENSDARG00000094067	si:dkey-121n8.7	1.89515e-27	0.986112
deseq2-15_37000001_39000000	AB_Tu_het_vs_AB_hom	ENSDARG00000095528	CR854897.1	2.16301e-18	0.890163
deseq2-15_37000001_39000000	AB_Tu_het_vs_AB_hom	ENSDARG00000028784	si:dkey-24p1.6	9.94567e-18	1.25847
deseq2-15_37000001_39000000	AB_Tu_het_vs_AB_hom	ENSDARG00000104424	CABZ01009512.2	9.94567e-18	-3.46868
deseq2-15_37000001_39000000	AB_Tu_het_vs_AB_hom	ENSDARG00000012381	hsc70	3.73561e-13	0.283988
deseq2-15_37000001_39000000	AB_Tu_het_vs_AB_hom	ENSDARG00000109999	RF00001	6.34515e-09	-2.92872
deseq2-15_37000001_39000000	AB_Tu_het_vs_AB_hom	ENSDARG00000088972	si:dkey-238d18.4	9.35941e-09	0.419852
deseq2-15_37000001_39000000	AB_Tu_het_vs_AB_hom	ENSDARG00000101123	CABZ01009512.1	9.35941e-09	-2.79001
deseq2-15_37000001_39000000	AB_Tu_het_vs_AB_hom	ENSDARG00000088274	si:ch211-181d7.1	4.13914e-08	-2.69942
deseq2-15_37000001_39000000	AB_Tu_het_vs_AB_hom	ENSDARG00000053928	si:dkey-117a8.3	2.83505e-07	-1.22131
deseq2-15_37000001_39000000	AB_Tu_het_vs_AB_hom	ENSDARG00000021633	sh3bgr	3.08576e-07	0.412519
deseq2-15_37000001_39000000	AB_Tu_het_vs_AB_hom	ENSDARG00000100592	slc8a2b	1.05295e-06	0.289936
deseq2-15_37000001_39000000	AB_Tu_het_vs_AB_hom	ENSDARG00000096898	CR925728.1	1.07841e-06	-1.71933
deseq2-15_37000001_39000000	AB_Tu_het_vs_AB_hom	ENSDARG00000035175	schip1	2.77498e-06	0.19458
deseq2-15_37000001_39000000	AB_Tu_het_vs_AB_hom	ENSDARG00000089404	si:dkey-24p1.7	3.96083e-06	0.7849
deseq2-15_37000001_39000000	AB_Tu_het_vs_AB_hom	ENSDARG00000076710	si:dkey-42l23.7	4.16002e-06	-0.670391
deseq2-15_37000001_39000000	AB_Tu_het_vs_AB_hom	ENSDARG00000097816	si:dkey-117a8.1	6.36648e-06	1.12144
deseq2-15_37000001_39000000	AB_Tu_het_vs_AB_hom	ENSDARG00000053800	si:ch211-276c2.4	9.64688e-05	0.137945
deseq2-15_37000001_39000000	AB_Tu_het_vs_AB_hom	ENSDARG00000096863	si:ch73-380l3.4	0.000321026	0.789288
deseq2-15_37000001_39000000	AB_Tu_het_vs_AB_hom	ENSDARG00000100108	cul3b	0.000506675	0.135941
deseq2-15_37000001_39000000	AB_Tu_het_vs_AB_hom	ENSDARG00000011488	sirt2	0.000532655	0.150912
deseq2-15_37000001_39000000	AB_Tu_het_vs_AB_hom	ENSDARG00000090935	usp16	0.00054179	-0.339824
deseq2-15_37000001_39000000	AB_Tu_het_vs_AB_hom	ENSDARG00000042742	stx6	0.000792548	0.166019
deseq2-15_37000001_39000000	AB_Tu_het_vs_AB_hom	ENSDARG00000091712	si:dkey-238d18.5	0.000923924	2.13034
deseq2-15_37000001_39000000	AB_Tu_het_vs_AB_hom	ENSDARG00000087835	si:ch211-113p18.3	0.0011853	-0.232398
deseq2-15_37000001_39000000	AB_Tu_het_vs_AB_hom	ENSDARG00000012915	ech1	0.00125023	0.290036
deseq2-15_37000001_39000000	AB_Tu_het_vs_AB_hom	ENSDARG00000039096	si:dkey-24p1.1	0.00488305	-0.697192
deseq2-15_37000001_39000000	AB_Tu_het_vs_AB_hom	ENSDARG00000041869	tnfrsf19	0.00929086	-0.156962
deseq2-15_37000001_39000000	AB_Tu_het_vs_AB_hom	ENSDARG00000025920	tiam1b	0.00929086	0.183418
deseq2-15_37000001_39000000	AB_Tu_het_vs_AB_hom	ENSDARG00000074747	brwd1	0.0117694	0.112106
deseq2-15_37000001_39000000	AB_Tu_het_vs_AB_hom	ENSDARG00000086712	si:dkeyp-97b10.3	0.0148376	-0.167384
deseq2-15_37000001_39000000	AB_Tu_het_vs_AB_hom	ENSDARG00000091658	sptssb	0.016525	1.13581
deseq2-15_37000001_39000000	AB_Tu_het_vs_AB_hom	ENSDARG00000069675	her8.2	0.0167549	-0.270004
deseq2-15_37000001_39000000	AB_Tu_het_vs_AB_hom	ENSDARG00000040306	otomp	0.0230439	-0.368694
deseq2-15_37000001_39000000	AB_Tu_het_vs_AB_hom	ENSDARG00000028118	dscamb	0.0468511	0.115934
deseq2-15_37000001_39000000	AB_Tu_het_vs_AB_hom	ENSDARG00000069708	cdc34a	0.0498844	-0.117138
deseq2-22_1_3000000	AB_Tu_het_vs_AB_hom	ENSDARG00000115428	CABZ01101813.1	2.07145e-37	1.21833
deseq2-22_1_3000000	AB_Tu_het_vs_AB_hom	ENSDARG00000098800	znf1156	1.72151e-35	4.18858
deseq2-22_1_3000000	AB_Tu_het_vs_AB_hom	ENSDARG00000099428	si:dkey-15h8.17	5.84629e-32	4.02071
deseq2-22_1_3000000	AB_Tu_het_vs_AB_hom	ENSDARG00000040141	si:ch73-138e16.5	4.53506e-12	2.44625
deseq2-22_1_3000000	AB_Tu_het_vs_AB_hom	ENSDARG00000043168	cela1.5	6.63536e-11	3.35211
deseq2-22_1_3000000	AB_Tu_het_vs_AB_hom	ENSDARG00000100755	CU074330.1	3.61664e-10	3.78898
deseq2-22_1_3000000	AB_Tu_het_vs_AB_hom	ENSDARG00000043173	cela1.3	3.8945e-10	3.06541
deseq2-22_1_3000000	AB_Tu_het_vs_AB_hom	ENSDARG00000077068	si:ch211-11p18.6	2.83963e-08	1.95315
deseq2-22_1_3000000	AB_Tu_het_vs_AB_hom	ENSDARG00000059367	mfap2	5.82434e-08	0.465822
deseq2-22_1_3000000	AB_Tu_het_vs_AB_hom	ENSDARG00000071590	si:ch211-236g6.1	5.82434e-08	2.64949
deseq2-22_1_3000000	AB_Tu_het_vs_AB_hom	ENSDARG00000093402	si:dkey-286j17.4	3.35399e-07	1.98486
deseq2-22_1_3000000	AB_Tu_het_vs_AB_hom	ENSDARG00000090600	si:ch211-213a13.1	5.34919e-07	1.08739
deseq2-22_1_3000000	AB_Tu_het_vs_AB_hom	ENSDARG00000109202	BX324216.3	8.13196e-07	1.0672
deseq2-22_1_3000000	AB_Tu_het_vs_AB_hom	ENSDARG00000112931	ndufaf3	8.75654e-07	-0.317175
deseq2-22_1_3000000	AB_Tu_het_vs_AB_hom	ENSDARG00000071604	si:ch211-156p11.1	1.42789e-06	1.86337
deseq2-22_1_3000000	AB_Tu_het_vs_AB_hom	ENSDARG00000104894	si:ch73-138e16.2	1.9794e-06	-0.421725
deseq2-22_1_3000000	AB_Tu_het_vs_AB_hom	ENSDARG00000111515	CABZ01061498.1	2.6199e-06	1.57107
deseq2-22_1_3000000	AB_Tu_het_vs_AB_hom	ENSDARG00000087046	si:ch211-222k6.2	2.84649e-06	0.891655
deseq2-22_1_3000000	AB_Tu_het_vs_AB_hom	ENSDARG00000074844	CABZ01061495.1	4.06597e-06	0.748332
deseq2-22_1_3000000	AB_Tu_het_vs_AB_hom	ENSDARG00000043171	cela1.4	4.82482e-06	0.966861
deseq2-22_1_3000000	AB_Tu_het_vs_AB_hom	ENSDARG00000095643	si:dkey-253d23.3	1.35949e-05	0.465561
[truncated: 2,790 more rows]
