# Supplementary material for: Allele-specific gene expression can underlie altered transcript abundance in zebrafish mutants
Source: eLife. 2022 Feb 17;11:e72825. doi: 10.7554/eLife.72825 (PMC8884726; doi:10.7554/eLife.72825)
Supplement: Figure 4—source data 1. — Jaccard index for each experiment represented in the boxplot. [file elife-72825-fig4-data1.xlsx]

## Sheet: fig4-source-data-1
expt_name	Jaccard_index	Num_terms_all_genes_only	Num_terms_both	Num_terms_linked_genes_removed_only	Num_all_sig_genes	Num_linked_sig_genes	Difference
capzb1_hi1858bTg	0.682171	26	88	15	161	147	14		expt_name	unique id for each experiment
dnmt8	0	2	0	5	18	13	5		Jaccard_index	Jaccard index for the overlap of enriched GO terms (number in intersection/number in union)
ffr	0.635071	36	134	41	1123	1048	75		Num_terms_all_genes_only	Number of GO terms enriched only when the full gene list is used
gmds_p31erb	0.819444	6	59	7	116	111	5		Num_terms_both	Number of GO terms enriched using either gene list
mitfa_w2	0.57377	12	35	14	41	34	7		Num_terms_linked_genes_removed_only	Number of GO terms enriched only when the gene list with linked genes removed is used
sox10_baz1	0.861111	7	62	3	79	71	8		Num_all_sig_genes	Total number of differentially expressed genes
sox10_t3_1	0.614035	13	35	9	59	48	11		Num_linked_sig_genes	Number of differentially expressed genes linked to the mutation
sox10_t3_2	0.777778	13	63	5	106	94	12		Difference	Difference between Num_all_sig_genes and Num_linked_sig_genes
sox10_t3_3	0.86747	7	72	4	129	116	13
sox10_t3_4	0.564263	87	180	52	1459	1356	103
sox10_t3_baz1_28hpf	0.703125	22	90	16	148	130	18
sox10_t3_baz1_36hpf	0.408333	43	49	28	302	270	32
tcf7l1a_m881	0.469697	14	31	21	42	35	7
zmp_ph1	0.594828	69	138	25	332	308	24
zmp_ph10	0.659091	79	232	41	3396	3251	145
zmp_ph108	0.8	3	36	6	222	200	22
zmp_ph11	0.766234	14	118	22	773	729	44
zmp_ph111	0.840909	5	37	2	434	403	31
zmp_ph114	0.766667	1	69	20	298	282	16
zmp_ph12	0.660532	106	323	60	7754	7341	413
zmp_ph13	0.648936	26	122	40	265	233	32
zmp_ph14	0.63038	63	249	83	3843	3630	213
zmp_ph15	0.925926	3	50	1	68	64	4
zmp_ph150	0.4	12	8	0	7	5	2
zmp_ph151	0	22	0	0	7	2	5
zmp_ph152	0.181818	12	4	6	40	32	8
zmp_ph155_kitlga	0.380952	12	8	1	4	3	1
zmp_ph155_mitfa	0.777778	3	42	9	42	36	6
zmp_ph16	0.831858	31	282	26	1823	1729	94
zmp_ph162	0.55814	3	24	16	71	67	4
zmp_ph163	0.207792	24	16	37	118	70	48
zmp_ph170	0.473684	9	9	1	23	19	4
zmp_ph172	1	0	10	0	3	3	0
zmp_ph175	0.944444	1	34	1	39	38	1
zmp_ph18	0.842491	24	230	19	1123	1089	34
zmp_ph180	0.246914	55	20	6	8	4	4
zmp_ph181	0.920455	1	81	6	29	26	3
zmp_ph185	0.666667	21	66	12	8	6	2
zmp_ph188	0.484848	7	16	10	48	37	11
zmp_ph19	0.798013	26	241	35	2177	2080	97
zmp_ph192_tfap2a	1	0	20	0	2	2	0
zmp_ph192_tfap2c	1	0	10	0	1	1	0
zmp_ph193	0.592593	10	32	12	35	27	8
zmp_ph194	0.885714	1	31	3	122	114	8
zmp_ph195	0.758621	6	22	1	115	105	10
zmp_ph196	0.714286	23	70	5	285	266	19
zmp_ph197	0.191011	56	17	16	57	23	34
zmp_ph198	0.573529	13	39	16	55	45	10
zmp_ph199	0.442623	54	81	48	288	263	25
zmp_ph2	0.202532	48	16	15	22	12	10
zmp_ph20	0.6	25	51	9	112	106	6
zmp_ph200	0.626984	19	79	28	168	153	15
zmp_ph202	0.875	2	35	3	109	103	6
zmp_ph203	0.754902	23	154	27	483	458	25
zmp_ph204	0.733333	11	66	13	128	117	11
zmp_ph205	0.662651	30	110	26	510	471	39
zmp_ph206	0.745679	41	302	62	1046	993	53
zmp_ph211	0.688889	4	31	10	44	38	6
zmp_ph212	0.604396	21	55	15	79	70	9
zmp_ph213	0.60396	15	61	25	478	458	20
zmp_ph214	0.739837	9	91	23	332	305	27
zmp_ph215	0.7	18	70	12	799	772	27
zmp_ph216	0.346154	14	9	3	28	23	5
zmp_ph219	0.555556	6	10	2	24	21	3
zmp_ph220	0.761905	53	336	52	3460	3335	125
zmp_ph23	0.78626	17	103	11	542	518	24
zmp_ph231	0.0869565	21	2	0	6	2	4
zmp_ph232	0.575758	56	95	14	411	383	28
zmp_ph234	0.394366	17	28	26	23	14	9
zmp_ph235	0.273684	14	26	55	53	31	22
zmp_ph238_tfap2a	0.666667	1	14	6	17	16	1
zmp_ph238_tfap2c	1	0	13	0	5	5	0
zmp_ph239	0.226415	33	12	8	67	43	24
zmp_ph25	0.632911	21	100	37	352	315	37
zmp_ph250_tfap2a	0.638889	3	23	10	6	5	1
zmp_ph250_tfap2c	1	0	58	0	7	7	0
zmp_ph255	0.80303	5	53	8	102	98	4
zmp_ph258	0	10	0	0	5	2	3
zmp_ph27	0.740741	15	120	27	615	570	45
zmp_ph29	0.741758	26	135	21	830	777	53
zmp_ph3	0.836735	30	328	34	661	633	28
zmp_ph31	0.718978	52	197	25	2084	1973	111
zmp_ph32	0.804348	10	74	8	122	118	4
zmp_ph35	0.302752	44	33	32	84	67	17
zmp_ph4	0.754808	31	157	20	1294	1224	70
zmp_ph40	0.713287	21	102	20	187	173	14
zmp_ph42	1	0	31	0	100	96	4
zmp_ph44	0.671875	31	86	11	374	350	24
zmp_ph45	1	0	72	0	17	14	3
zmp_ph46	0.698413	28	132	29	455	429	26
zmp_ph48	0.650108	61	301	101	4377	4194	183
zmp_ph5	0.954023	4	83	0	99	98	1
zmp_ph51	0.454545	19	40	29	241	200	41
zmp_ph54	0.681223	81	312	65	4647	4468	179
zmp_ph55	0.741611	42	221	35	3529	3301	228
zmp_ph56	0.590909	25	78	29	604	548	56
zmp_ph58	0.71777	46	206	35	3164	3048	116
zmp_ph6	0.785047	27	168	19	664	627	37
zmp_ph69	0.833333	18	155	13	637	601	36
zmp_ph7	0.806202	19	104	6	240	227	13
zmp_ph71	0.183099	24	13	34	141	124	17
zmp_ph77	0.8	15	144	21	726	674	52
zmp_ph78	0.534884	6	23	14	22	16	6
zmp_ph8	1	0	13	0	12	12	0
zmp_ph80_ryr1	0.735294	8	75	19	564	531	33
zmp_ph86	0.829787	1	39	7	53	50	3
zmp_ph87	0.661765	8	45	15	432	409	23
zmp_ph88	0.079646	63	9	41	48	11	37
zmp_ph9	0.826087	41	285	19	2596	2474	122
zmp_ph90	0.05	15	1	4	16	10	6
zmp_ph97	0.755814	10	65	11	262	241	21
zmp_ph97	0.6	13	39	13	297	276	21
zmp_ph98	0.820513	9	64	5	187	171	16
