# Supplementary material for: Allele-specific gene expression can underlie altered transcript abundance in zebrafish mutants
Source: eLife. 2022 Feb 17;11:e72825. doi: 10.7554/eLife.72825 (PMC8884726; doi:10.7554/eLife.72825)
Supplement: Figure 4—source data 2. — Enriched GO terms and their position in the list of GO terms by p-value. [file elife-72825-fig4-data2.xlsx]

## Sheet: fig4-source-data-2
GO.ID	Term	domain	Set	position-all-genes	position-linked-genes-removed	pval
GO:0033059	cellular pigmentation	BP	Both	1	2	8.9e-09
GO:0030318	melanocyte differentiation	BP	Both	2	1	1.1e-08
GO:0002181	cytoplasmic translation	BP	Both	3	3	1.4e-05
GO:0042558	pteridine-containing compound metabolic ...	BP	Both	4	6	0.00029
GO:0048066	developmental pigmentation	BP	Both	5	4	0.00022
GO:0000027	ribosomal large subunit assembly	BP	Both	6	7	0.00093
GO:0046173	polyol biosynthetic process	BP	Both	7	8	0.00093
GO:0055114	oxidation-reduction process	BP	Both	8	5	0.00136
GO:0035725	sodium ion transmembrane transport	BP	Both	9	9	0.00167
GO:0006412	translation	BP	Both	10	15	0.00905
GO:0000028	ribosomal small subunit assembly	BP	Both	11	10	0.00623
GO:0015991	ATP hydrolysis coupled proton transport	BP	Both	12	24	0.03241
GO:0006342	chromatin silencing	BP	All_genes	13	NA	0.00733
GO:0003406	retinal pigment epithelium development	BP	Both	14	11	0.00809
GO:0010631	epithelial cell migration	BP	Both	15	12	0.01006
GO:0031497	chromatin assembly	BP	All_genes	16	NA	0.01009
GO:0051905	establishment of pigment granule localiz...	BP	Both	17	13	0.01024
GO:0060872	semicircular canal development	BP	All_genes	18	NA	0.01024
GO:0051875	pigment granule localization	BP	All_genes	19	NA	0.01269
GO:0098869	cellular oxidant detoxification	BP	Both	20	14	0.01337
GO:0006333	chromatin assembly or disassembly	BP	All_genes	21	NA	0.01395
GO:0090132	epithelium migration	BP	All_genes	22	NA	0.01526
GO:0050931	pigment cell differentiation	BP	Both	23	18	0.01661
GO:0098754	detoxification	BP	All_genes	24	NA	0.01731
GO:0030490	maturation of SSU-rRNA	BP	Both	25	17	0.01731
GO:1990748	cellular detoxification	BP	All_genes	26	NA	0.01731
GO:0097237	cellular response to toxic substance	BP	All_genes	27	NA	0.01731
GO:0016050	vesicle organization	BP	Both	28	16	0.0183
GO:0090130	tissue migration	BP	All_genes	29	NA	0.02191
GO:0006936	muscle contraction	BP	All_genes	30	NA	0.0224
GO:0055080	cation homeostasis	BP	All_genes	31	NA	0.02249
GO:0098771	inorganic ion homeostasis	BP	All_genes	32	NA	0.02511
GO:0050801	ion homeostasis	BP	All_genes	33	NA	0.02511
GO:0006323	DNA packaging	BP	All_genes	34	NA	0.02654
GO:0006732	coenzyme metabolic process	BP	Both	35	38	0.04831
GO:0003012	muscle system process	BP	All_genes	36	NA	0.02878
GO:0006338	chromatin remodeling	BP	All_genes	37	NA	0.03008
GO:0034765	regulation of ion transmembrane transpor...	BP	Both	38	19	0.03008
GO:0065008	regulation of biological quality	BP	All_genes	39	NA	0.03156
GO:0030003	cellular cation homeostasis	BP	All_genes	40	NA	0.03184
GO:0007417	central nervous system development	BP	All_genes	41	NA	0.03329
GO:0051271	negative regulation of cellular componen...	BP	All_genes	42	NA	0.03389
GO:0040013	negative regulation of locomotion	BP	All_genes	43	NA	0.03389
GO:0030641	regulation of cellular pH	BP	All_genes	44	NA	0.03389
GO:0006873	cellular ion homeostasis	BP	All_genes	45	NA	0.03557
GO:0034762	regulation of transmembrane transport	BP	Both	46	20	0.03641
GO:0030004	cellular monovalent inorganic cation hom...	BP	All_genes	47	NA	0.03851
GO:0055013	cardiac muscle cell development	BP	Both	48	21	0.03851
GO:0006885	regulation of pH	BP	All_genes	49	NA	0.03851
GO:0019725	cellular homeostasis	BP	All_genes	50	NA	0.03857
GO:0060027	convergent extension involved in gastrul...	BP	All_genes	51	NA	0.03984
GO:0017144	drug metabolic process	BP	Both	52	37	0.04755
GO:0007420	brain development	BP	All_genes	53	NA	0.04018
GO:0071599	otic vesicle development	BP	Both	54	27	0.04343
GO:0007423	sensory organ development	BP	All_genes	55	NA	0.04407
GO:0051650	establishment of vesicle localization	BP	All_genes	56	NA	0.04723
GO:0006364	rRNA processing	BP	Both	57	22	0.04795
GO:0003009	skeletal muscle contraction	BP	All_genes	58	NA	0.04849
GO:0060035	notochord cell development	BP	All_genes	59	NA	0.04849
GO:0021952	central nervous system projection neuron...	BP	All_genes	60	NA	0.04849
GO:0055067	monovalent inorganic cation homeostasis	BP	All_genes	61	NA	0.04865
GO:0055006	cardiac cell development	BP	Both	62	30	0.04865
GO:0003735	structural constituent of ribosome	MF	Both	1	1	1.6e-11
GO:0019843	rRNA binding	MF	Both	2	3	0.00042
GO:0016491	oxidoreductase activity	MF	Both	3	2	0.0011
GO:0015276	ligand-gated ion channel activity	MF	Both	4	4	0.0022
GO:0046961	proton-transporting ATPase activity, rot...	MF	Both	5	10	0.016
GO:0016903	oxidoreductase activity, acting on the a...	MF	Both	6	5	0.0094
GO:0016209	antioxidant activity	MF	Both	7	6	0.0108
GO:0016614	oxidoreductase activity, acting on CH-OH...	MF	Both	8	7	0.0175
GO:0016620	oxidoreductase activity, acting on the a...	MF	Both	9	9	0.0217
GO:0015085	calcium ion transmembrane transporter ac...	MF	All_genes	10	NA	0.0221
GO:0036094	small molecule binding	MF	All_genes	11	NA	0.0323
GO:0005261	cation channel activity	MF	Both	12	12	0.0327
GO:0016879	ligase activity, forming carbon-nitrogen...	MF	Both	13	13	0.0328
GO:0019887	protein kinase regulator activity	MF	All_genes	14	NA	0.0389
GO:0016668	oxidoreductase activity, acting on a sul...	MF	Both	15	18	0.0432
GO:0008307	structural constituent of muscle	MF	Both	16	19	0.0432
GO:0000166	nucleotide binding	MF	All_genes	17	NA	0.0446
GO:1901265	nucleoside phosphate binding	MF	All_genes	18	NA	0.0446
GO:0016616	oxidoreductase activity, acting on the C...	MF	Both	19	15	0.0457
GO:0022625	cytosolic large ribosomal subunit	CC	Both	1	1	4.8e-08
GO:0022627	cytosolic small ribosomal subunit	CC	Both	2	2	0.00017
GO:0033176	proton-transporting V-type ATPase comple...	CC	Both	3	5	0.02007
GO:0030018	Z disc	CC	Both	4	3	0.0058
GO:0005887	integral component of plasma membrane	CC	Both	5	4	0.0076
GO:0045121	membrane raft	CC	Both	6	8	0.03636
GO:0017053	transcriptional repressor complex	CC	All_genes	7	NA	0.025
GO:0015629	actin cytoskeleton	CC	Both	8	11	0.03708
GO:0036477	somatodendritic compartment	CC	Both	9	7	0.0431
GO:0016528	sarcoplasm	CC	All_genes	10	NA	0.0431
GO:0000785	chromatin	CC	All_genes	11	NA	0.046
GO:0090662	ATP hydrolysis coupled transmembrane tra...	BP	Linked_genes_removed_only	NA	23	0.03241
GO:0099131	ATP hydrolysis coupled ion transmembrane...	BP	Linked_genes_removed_only	NA	25	0.03241
GO:0015988	energy coupled proton transmembrane tran...	BP	Linked_genes_removed_only	NA	26	0.03241
GO:0034470	ncRNA processing	BP	Linked_genes_removed_only	NA	28	0.03483
GO:0043269	regulation of ion transport	BP	Linked_genes_removed_only	NA	29	0.03583
GO:0043473	pigmentation	BP	Linked_genes_removed_only	NA	31	0.04022
GO:0016072	rRNA metabolic process	BP	Linked_genes_removed_only	NA	32	0.04147
GO:0009108	coenzyme biosynthetic process	BP	Linked_genes_removed_only	NA	33	0.04602
GO:0072332	intrinsic apoptotic signaling pathway by...	BP	Linked_genes_removed_only	NA	34	0.047
GO:0042451	purine nucleoside biosynthetic process	BP	Linked_genes_removed_only	NA	35	0.047
GO:0046129	purine ribonucleoside biosynthetic proce...	BP	Linked_genes_removed_only	NA	36	0.047
GO:0015077	monovalent inorganic cation transmembran...	MF	Linked_genes_removed_only	NA	8	0.01328
GO:0036442	proton-exporting ATPase activity	MF	Linked_genes_removed_only	NA	11	0.016
GO:0015318	inorganic molecular entity transmembrane...	MF	Linked_genes_removed_only	NA	14	0.02478
GO:0015267	channel activity	MF	Linked_genes_removed_only	NA	16	0.03445
GO:0022803	passive transmembrane transporter activi...	MF	Linked_genes_removed_only	NA	17	0.03445
GO:0022857	transmembrane transporter activity	MF	Linked_genes_removed_only	NA	20	0.03788
GO:0016835	carbon-oxygen lyase activity	MF	Linked_genes_removed_only	NA	21	0.03864
GO:0070001	aspartic-type peptidase activity	MF	Linked_genes_removed_only	NA	22	0.04941
GO:0004190	aspartic-type endopeptidase activity	MF	Linked_genes_removed_only	NA	23	0.04941
GO:0004364	glutathione transferase activity	MF	Linked_genes_removed_only	NA	24	0.04941
GO:0005230	extracellular ligand-gated ion channel a...	MF	Linked_genes_removed_only	NA	25	0.04941
GO:0031492	nucleosomal DNA binding	MF	Linked_genes_removed_only	NA	26	0.04941
GO:0016469	proton-transporting two-sector ATPase co...	CC	Linked_genes_removed_only	NA	6	0.0229
GO:0098857	membrane microdomain	CC	Linked_genes_removed_only	NA	9	0.03636
GO:0098589	membrane region	CC	Linked_genes_removed_only	NA	10	0.03636
GO:0033180	proton-transporting V-type ATPase, V1 do...	CC	Linked_genes_removed_only	NA	12	0.0402
GO:0030686	90S preribosome	CC	Linked_genes_removed_only	NA	13	0.04732
