# Supplementary material for: Allele-specific gene expression can underlie altered transcript abundance in zebrafish mutants
Source: eLife. 2022 Feb 17;11:e72825. doi: 10.7554/eLife.72825 (PMC8884726; doi:10.7554/eLife.72825)
Supplement: Figure 5—source data 1. — Normalised counts for polr3h (ENSDARG00000102590) in sox10t3/baz1 incross at Prim-5 (24 hr post-fertilisation [hpf]). [file elife-72825-fig5-data1.xlsx]

## Sheet: ENSDARG00000102590-counts
sample	condition	normalised_count
zmp_ph198_A11	wt_t3_wt_baz1	13.9928
zmp_ph198_A4	wt_t3_wt_baz1	11.9409
zmp_ph198_A5	wt_t3_wt_baz1	6.92307
zmp_ph198_A7	wt_t3_wt_baz1	12.6224
zmp_ph198_B6	wt_t3_wt_baz1	15.7199
zmp_ph198_C11	wt_t3_wt_baz1	7.79353
zmp_ph198_C1	wt_t3_wt_baz1	11.2653
zmp_ph198_C2	wt_t3_wt_baz1	5.64915
zmp_ph198_C4	wt_t3_wt_baz1	11.9008
zmp_ph198_D1	wt_t3_wt_baz1	13.3236
zmp_ph198_D2	wt_t3_wt_baz1	7.00743
zmp_ph198_D3	wt_t3_wt_baz1	15.9151
zmp_ph198_A3	het_t3_wt_baz1	16.7647
zmp_ph198_B10	het_t3_wt_baz1	20.6363
zmp_ph198_B11	het_t3_wt_baz1	19.9096
zmp_ph198_B2	het_t3_wt_baz1	14.0333
zmp_ph198_B8	het_t3_wt_baz1	29.3191
zmp_ph198_B9	het_t3_wt_baz1	22.6117
zmp_ph198_C5	het_t3_wt_baz1	30.6517
zmp_ph198_C8	het_t3_wt_baz1	35.586
zmp_ph198_D11	het_t3_wt_baz1	23.1537
zmp_ph198_D7	het_t3_wt_baz1	33.7422
zmp_ph198_E2	het_t3_wt_baz1	28.9754
zmp_ph198_E4	het_t3_wt_baz1	25.2472
zmp_ph198_A9	wt_t3_het_baz1	10.2633
zmp_ph198_B4	wt_t3_het_baz1	20.0197
zmp_ph198_B5	wt_t3_het_baz1	10.6471
zmp_ph198_C6	wt_t3_het_baz1	11.3665
zmp_ph198_D4	wt_t3_het_baz1	16.1117
zmp_ph198_D6	wt_t3_het_baz1	11.9527
zmp_ph198_D8	wt_t3_het_baz1	11.2187
zmp_ph198_E11	wt_t3_het_baz1	13.0745
zmp_ph198_E12	wt_t3_het_baz1	6.47463
zmp_ph198_E3	wt_t3_het_baz1	14.3948
zmp_ph198_E6	wt_t3_het_baz1	17.1232
zmp_ph198_F1	wt_t3_het_baz1	10.3368
zmp_ph198_A10	het_t3_het_baz1	19.708
zmp_ph198_A6	het_t3_het_baz1	22.9286
zmp_ph198_A8	het_t3_het_baz1	43.8472
zmp_ph198_B3	het_t3_het_baz1	35.7833
zmp_ph198_B7	het_t3_het_baz1	22.4952
zmp_ph198_C10	het_t3_het_baz1	31.7552
zmp_ph198_C3	het_t3_het_baz1	28.2869
zmp_ph198_C9	het_t3_het_baz1	23.682
zmp_ph198_D10	het_t3_het_baz1	29.9306
zmp_ph198_D12	het_t3_het_baz1	28.2123
zmp_ph198_D5	het_t3_het_baz1	33.5407
zmp_ph198_D9	het_t3_het_baz1	20.372
