# Supplementary material for: Allele-specific gene expression can underlie altered transcript abundance in zebrafish mutants
Source: eLife. 2022 Feb 17;11:e72825. doi: 10.7554/eLife.72825 (PMC8884726; doi:10.7554/eLife.72825)
Supplement: Figure 5—source data 2. — Normalised counts for vasnb (ENSDARG00000102565) in sox10t3/baz1 incross at Prim-5 (24 post-fertilisation [hpf]). [file elife-72825-fig5-data2.xlsx]

## Sheet: ENSDARG00000102565-counts
sample	condition	normalised_count
zmp_ph198_A11	wt_t3_wt_baz1	43.1444
zmp_ph198_A4	wt_t3_wt_baz1	32.8374
zmp_ph198_A5	wt_t3_wt_baz1	56.923
zmp_ph198_A7	wt_t3_wt_baz1	55.5384
zmp_ph198_B6	wt_t3_wt_baz1	58.2562
zmp_ph198_C11	wt_t3_wt_baz1	57.1525
zmp_ph198_C1	wt_t3_wt_baz1	48.2798
zmp_ph198_C2	wt_t3_wt_baz1	43.3101
zmp_ph198_C4	wt_t3_wt_baz1	80.5591
zmp_ph198_D1	wt_t3_wt_baz1	48.5921
zmp_ph198_D2	wt_t3_wt_baz1	45.9376
zmp_ph198_D3	wt_t3_wt_baz1	54.2985
zmp_ph198_A3	het_t3_wt_baz1	50.2942
zmp_ph198_B10	het_t3_wt_baz1	33.9892
zmp_ph198_B11	het_t3_wt_baz1	29.8644
zmp_ph198_B2	het_t3_wt_baz1	50.8708
zmp_ph198_B8	het_t3_wt_baz1	15.7872
zmp_ph198_B9	het_t3_wt_baz1	68.9658
zmp_ph198_C5	het_t3_wt_baz1	35.6223
zmp_ph198_C8	het_t3_wt_baz1	32.3509
zmp_ph198_D11	het_t3_wt_baz1	39.9927
zmp_ph198_D7	het_t3_wt_baz1	35.4726
zmp_ph198_E2	het_t3_wt_baz1	61.8142
zmp_ph198_E4	het_t3_wt_baz1	41.8157
zmp_ph198_A9	wt_t3_het_baz1	30.7898
zmp_ph198_B4	wt_t3_het_baz1	40.6115
zmp_ph198_B5	wt_t3_het_baz1	33.7157
zmp_ph198_C6	wt_t3_het_baz1	41.3326
zmp_ph198_D4	wt_t3_het_baz1	29.5382
zmp_ph198_D6	wt_t3_het_baz1	33.6848
zmp_ph198_D8	wt_t3_het_baz1	44.8747
zmp_ph198_E11	wt_t3_het_baz1	21.3946
zmp_ph198_E12	wt_t3_het_baz1	34.5314
zmp_ph198_E3	wt_t3_het_baz1	42.4269
zmp_ph198_E6	wt_t3_het_baz1	41.297
zmp_ph198_F1	wt_t3_het_baz1	42.4957
zmp_ph198_A10	het_t3_het_baz1	43.1112
zmp_ph198_A6	het_t3_het_baz1	25.3006
zmp_ph198_A8	het_t3_het_baz1	15.0333
zmp_ph198_B3	het_t3_het_baz1	25.3101
zmp_ph198_B7	het_t3_het_baz1	29.4765
zmp_ph198_C10	het_t3_het_baz1	24.0569
zmp_ph198_C3	het_t3_het_baz1	22.0009
zmp_ph198_C9	het_t3_het_baz1	40.2595
zmp_ph198_D10	het_t3_het_baz1	21.6738
zmp_ph198_D12	het_t3_het_baz1	14.4502
zmp_ph198_D5	het_t3_het_baz1	22.0878
zmp_ph198_D9	het_t3_het_baz1	22.9185
