# Supplementary material for: Allele-specific gene expression can underlie altered transcript abundance in zebrafish mutants
Source: eLife. 2022 Feb 17;11:e72825. doi: 10.7554/eLife.72825 (PMC8884726; doi:10.7554/eLife.72825)
Supplement: Figure 5—source data 3. — Normalised counts for the genes represented by the boxplots in Figure 5C (sox10t3/baz1 incross at Prim-5/24 hr post-fertilisation [hpf]). [file elife-72825-fig5-data3.xlsx]

## Sheet: fig4-source-data-3
GeneID	GeneName	sample	condition	count
ENSDARG00000077467	sox10	zmp_ph198_A4r	wt_t3_wt_baz1	0.139023
ENSDARG00000077467	sox10	zmp_ph198_A5r	wt_t3_wt_baz1	-0.578593
ENSDARG00000077467	sox10	zmp_ph198_A7r	wt_t3_wt_baz1	0.975894
ENSDARG00000077467	sox10	zmp_ph198_A11r	wt_t3_wt_baz1	0.51161
ENSDARG00000077467	sox10	zmp_ph198_B6r	wt_t3_wt_baz1	0.282713
ENSDARG00000077467	sox10	zmp_ph198_C1r	wt_t3_wt_baz1	0.308232
ENSDARG00000077467	sox10	zmp_ph198_C2r	wt_t3_wt_baz1	-0.477278
ENSDARG00000077467	sox10	zmp_ph198_C4r	wt_t3_wt_baz1	0.738443
ENSDARG00000077467	sox10	zmp_ph198_C11r	wt_t3_wt_baz1	0.313546
ENSDARG00000077467	sox10	zmp_ph198_D1r	wt_t3_wt_baz1	0.374916
ENSDARG00000077467	sox10	zmp_ph198_D2r	wt_t3_wt_baz1	0.174018
ENSDARG00000077467	sox10	zmp_ph198_D3r	wt_t3_wt_baz1	0.974743
ENSDARG00000077467	sox10	zmp_ph198_A3r	het_t3_wt_baz1	0.365469
ENSDARG00000077467	sox10	zmp_ph198_B2r	het_t3_wt_baz1	0.194579
ENSDARG00000077467	sox10	zmp_ph198_B8r	het_t3_wt_baz1	-0.246046
ENSDARG00000077467	sox10	zmp_ph198_B9r	het_t3_wt_baz1	-0.174124
ENSDARG00000077467	sox10	zmp_ph198_B10r	het_t3_wt_baz1	-0.1504
ENSDARG00000077467	sox10	zmp_ph198_B11r	het_t3_wt_baz1	-1.17035
ENSDARG00000077467	sox10	zmp_ph198_C5r	het_t3_wt_baz1	0.389002
ENSDARG00000077467	sox10	zmp_ph198_C8r	het_t3_wt_baz1	-0.625775
ENSDARG00000077467	sox10	zmp_ph198_D7r	het_t3_wt_baz1	-0.246621
ENSDARG00000077467	sox10	zmp_ph198_D11r	het_t3_wt_baz1	-0.638236
ENSDARG00000077467	sox10	zmp_ph198_E2r	het_t3_wt_baz1	0.176865
ENSDARG00000077467	sox10	zmp_ph198_E4r	het_t3_wt_baz1	-0.346194
ENSDARG00000077467	sox10	zmp_ph198_A9r	wt_t3_het_baz1	1.40072
ENSDARG00000077467	sox10	zmp_ph198_B4r	wt_t3_het_baz1	1.29402
ENSDARG00000077467	sox10	zmp_ph198_B5r	wt_t3_het_baz1	-0.450995
ENSDARG00000077467	sox10	zmp_ph198_C6r	wt_t3_het_baz1	2.05438
ENSDARG00000077467	sox10	zmp_ph198_D4r	wt_t3_het_baz1	1.55987
ENSDARG00000077467	sox10	zmp_ph198_D6r	wt_t3_het_baz1	0.820828
ENSDARG00000077467	sox10	zmp_ph198_D8r	wt_t3_het_baz1	0.860465
ENSDARG00000077467	sox10	zmp_ph198_E3r	wt_t3_het_baz1	0.28154
ENSDARG00000077467	sox10	zmp_ph198_E6r	wt_t3_het_baz1	0.465561
ENSDARG00000077467	sox10	zmp_ph198_E11r	wt_t3_het_baz1	1.89188
ENSDARG00000077467	sox10	zmp_ph198_E12r	wt_t3_het_baz1	2.3162
ENSDARG00000077467	sox10	zmp_ph198_F1r	wt_t3_het_baz1	0.33281
ENSDARG00000077467	sox10	zmp_ph198_A6r	het_t3_het_baz1	-0.805159
ENSDARG00000077467	sox10	zmp_ph198_A8r	het_t3_het_baz1	-1.25221
ENSDARG00000077467	sox10	zmp_ph198_A10r	het_t3_het_baz1	-1.56068
ENSDARG00000077467	sox10	zmp_ph198_B3r	het_t3_het_baz1	-0.176375
ENSDARG00000077467	sox10	zmp_ph198_B7r	het_t3_het_baz1	-1.83594
ENSDARG00000077467	sox10	zmp_ph198_C3r	het_t3_het_baz1	-1.69014
ENSDARG00000077467	sox10	zmp_ph198_C9r	het_t3_het_baz1	-0.969627
ENSDARG00000077467	sox10	zmp_ph198_C10r	het_t3_het_baz1	-1.52461
ENSDARG00000077467	sox10	zmp_ph198_D5r	het_t3_het_baz1	-0.65302
ENSDARG00000077467	sox10	zmp_ph198_D9r	het_t3_het_baz1	-1.00915
ENSDARG00000077467	sox10	zmp_ph198_D10r	het_t3_het_baz1	-1.03574
ENSDARG00000077467	sox10	zmp_ph198_D12r	het_t3_het_baz1	-1.58006
ENSDARG00000099371	cygb1	zmp_ph198_A4r	wt_t3_wt_baz1	1.08622
ENSDARG00000099371	cygb1	zmp_ph198_A5r	wt_t3_wt_baz1	2.9335
ENSDARG00000099371	cygb1	zmp_ph198_A7r	wt_t3_wt_baz1	-0.522301
ENSDARG00000099371	cygb1	zmp_ph198_A11r	wt_t3_wt_baz1	1.0689
ENSDARG00000099371	cygb1	zmp_ph198_B6r	wt_t3_wt_baz1	1.1185
ENSDARG00000099371	cygb1	zmp_ph198_C1r	wt_t3_wt_baz1	1.02443
ENSDARG00000099371	cygb1	zmp_ph198_C2r	wt_t3_wt_baz1	0.257145
ENSDARG00000099371	cygb1	zmp_ph198_C4r	wt_t3_wt_baz1	0.238594
ENSDARG00000099371	cygb1	zmp_ph198_C11r	wt_t3_wt_baz1	0.554369
ENSDARG00000099371	cygb1	zmp_ph198_D1r	wt_t3_wt_baz1	1.36684
ENSDARG00000099371	cygb1	zmp_ph198_D2r	wt_t3_wt_baz1	0.00942458
ENSDARG00000099371	cygb1	zmp_ph198_D3r	wt_t3_wt_baz1	2.42248
ENSDARG00000099371	cygb1	zmp_ph198_A3r	het_t3_wt_baz1	0.233597
ENSDARG00000099371	cygb1	zmp_ph198_B2r	het_t3_wt_baz1	0.0313447
ENSDARG00000099371	cygb1	zmp_ph198_B8r	het_t3_wt_baz1	-1.10651
ENSDARG00000099371	cygb1	zmp_ph198_B9r	het_t3_wt_baz1	-0.453697
ENSDARG00000099371	cygb1	zmp_ph198_B10r	het_t3_wt_baz1	-0.0724988
ENSDARG00000099371	cygb1	zmp_ph198_B11r	het_t3_wt_baz1	-0.0840081
ENSDARG00000099371	cygb1	zmp_ph198_C5r	het_t3_wt_baz1	0.032607
ENSDARG00000099371	cygb1	zmp_ph198_C8r	het_t3_wt_baz1	-0.407568
ENSDARG00000099371	cygb1	zmp_ph198_D7r	het_t3_wt_baz1	-0.596992
ENSDARG00000099371	cygb1	zmp_ph198_D11r	het_t3_wt_baz1	-0.0972606
ENSDARG00000099371	cygb1	zmp_ph198_E2r	het_t3_wt_baz1	0.285224
ENSDARG00000099371	cygb1	zmp_ph198_E4r	het_t3_wt_baz1	0.0185826
ENSDARG00000099371	cygb1	zmp_ph198_A9r	wt_t3_het_baz1	0.605897
ENSDARG00000099371	cygb1	zmp_ph198_B4r	wt_t3_het_baz1	-0.898363
ENSDARG00000099371	cygb1	zmp_ph198_B5r	wt_t3_het_baz1	2.02774
ENSDARG00000099371	cygb1	zmp_ph198_C6r	wt_t3_het_baz1	0.234735
ENSDARG00000099371	cygb1	zmp_ph198_D4r	wt_t3_het_baz1	-0.513128
ENSDARG00000099371	cygb1	zmp_ph198_D6r	wt_t3_het_baz1	-0.0940995
ENSDARG00000099371	cygb1	zmp_ph198_D8r	wt_t3_het_baz1	0.5205
ENSDARG00000099371	cygb1	zmp_ph198_E3r	wt_t3_het_baz1	0.89443
ENSDARG00000099371	cygb1	zmp_ph198_E6r	wt_t3_het_baz1	0.0810169
ENSDARG00000099371	cygb1	zmp_ph198_E11r	wt_t3_het_baz1	1.36519
ENSDARG00000099371	cygb1	zmp_ph198_E12r	wt_t3_het_baz1	-0.464804
ENSDARG00000099371	cygb1	zmp_ph198_F1r	wt_t3_het_baz1	-0.706786
ENSDARG00000099371	cygb1	zmp_ph198_A6r	het_t3_het_baz1	-1.21932
ENSDARG00000099371	cygb1	zmp_ph198_A8r	het_t3_het_baz1	-0.967696
ENSDARG00000099371	cygb1	zmp_ph198_A10r	het_t3_het_baz1	-1.15212
ENSDARG00000099371	cygb1	zmp_ph198_B3r	het_t3_het_baz1	-1.21506
ENSDARG00000099371	cygb1	zmp_ph198_B7r	het_t3_het_baz1	-0.356009
ENSDARG00000099371	cygb1	zmp_ph198_C3r	het_t3_het_baz1	-0.361278
ENSDARG00000099371	cygb1	zmp_ph198_C9r	het_t3_het_baz1	-1.25994
ENSDARG00000099371	cygb1	zmp_ph198_C10r	het_t3_het_baz1	-1.16497
ENSDARG00000099371	cygb1	zmp_ph198_D5r	het_t3_het_baz1	-1.11386
ENSDARG00000099371	cygb1	zmp_ph198_D9r	het_t3_het_baz1	-1.18523
ENSDARG00000099371	cygb1	zmp_ph198_D10r	het_t3_het_baz1	-1.20005
ENSDARG00000099371	cygb1	zmp_ph198_D12r	het_t3_het_baz1	-1.19773
ENSDARG00000099172	BX000701.1	zmp_ph198_A4r	wt_t3_wt_baz1	1.38083
ENSDARG00000099172	BX000701.1	zmp_ph198_A5r	wt_t3_wt_baz1	0.98458
ENSDARG00000099172	BX000701.1	zmp_ph198_A7r	wt_t3_wt_baz1	0.601662
ENSDARG00000099172	BX000701.1	zmp_ph198_A11r	wt_t3_wt_baz1	1.00716
ENSDARG00000099172	BX000701.1	zmp_ph198_B6r	wt_t3_wt_baz1	-0.293546
ENSDARG00000099172	BX000701.1	zmp_ph198_C1r	wt_t3_wt_baz1	-0.0326564
ENSDARG00000099172	BX000701.1	zmp_ph198_C2r	wt_t3_wt_baz1	3.49258
ENSDARG00000099172	BX000701.1	zmp_ph198_C4r	wt_t3_wt_baz1	0.75544
ENSDARG00000099172	BX000701.1	zmp_ph198_C11r	wt_t3_wt_baz1	0.952624
ENSDARG00000099172	BX000701.1	zmp_ph198_D1r	wt_t3_wt_baz1	1.2059
ENSDARG00000099172	BX000701.1	zmp_ph198_D2r	wt_t3_wt_baz1	2.98937
ENSDARG00000099172	BX000701.1	zmp_ph198_D3r	wt_t3_wt_baz1	0.582261
ENSDARG00000099172	BX000701.1	zmp_ph198_A3r	het_t3_wt_baz1	-0.536544
ENSDARG00000099172	BX000701.1	zmp_ph198_B2r	het_t3_wt_baz1	-0.945488
ENSDARG00000099172	BX000701.1	zmp_ph198_B8r	het_t3_wt_baz1	-1.14813
ENSDARG00000099172	BX000701.1	zmp_ph198_B9r	het_t3_wt_baz1	0.680376
ENSDARG00000099172	BX000701.1	zmp_ph198_B10r	het_t3_wt_baz1	0.534652
ENSDARG00000099172	BX000701.1	zmp_ph198_B11r	het_t3_wt_baz1	-0.263518
ENSDARG00000099172	BX000701.1	zmp_ph198_C5r	het_t3_wt_baz1	0.191687
ENSDARG00000099172	BX000701.1	zmp_ph198_C8r	het_t3_wt_baz1	0.159903
ENSDARG00000099172	BX000701.1	zmp_ph198_D7r	het_t3_wt_baz1	0.0512418
ENSDARG00000099172	BX000701.1	zmp_ph198_D11r	het_t3_wt_baz1	-0.175493
ENSDARG00000099172	BX000701.1	zmp_ph198_E2r	het_t3_wt_baz1	-0.25552
ENSDARG00000099172	BX000701.1	zmp_ph198_E4r	het_t3_wt_baz1	0.310172
ENSDARG00000099172	BX000701.1	zmp_ph198_A9r	wt_t3_het_baz1	-0.0702834
ENSDARG00000099172	BX000701.1	zmp_ph198_B4r	wt_t3_het_baz1	0.173423
ENSDARG00000099172	BX000701.1	zmp_ph198_B5r	wt_t3_het_baz1	-0.533148
ENSDARG00000099172	BX000701.1	zmp_ph198_C6r	wt_t3_het_baz1	-1.14813
ENSDARG00000099172	BX000701.1	zmp_ph198_D4r	wt_t3_het_baz1	-0.114099
ENSDARG00000099172	BX000701.1	zmp_ph198_D6r	wt_t3_het_baz1	-0.897078
ENSDARG00000099172	BX000701.1	zmp_ph198_D8r	wt_t3_het_baz1	0.579871
ENSDARG00000099172	BX000701.1	zmp_ph198_E3r	wt_t3_het_baz1	-0.272911
ENSDARG00000099172	BX000701.1	zmp_ph198_E6r	wt_t3_het_baz1	-0.449978
ENSDARG00000099172	BX000701.1	zmp_ph198_E11r	wt_t3_het_baz1	1.0488
ENSDARG00000099172	BX000701.1	zmp_ph198_E12r	wt_t3_het_baz1	-0.649491
ENSDARG00000099172	BX000701.1	zmp_ph198_F1r	wt_t3_het_baz1	-0.0866855
ENSDARG00000099172	BX000701.1	zmp_ph198_A6r	het_t3_het_baz1	-0.782786
ENSDARG00000099172	BX000701.1	zmp_ph198_A8r	het_t3_het_baz1	-1.14813
ENSDARG00000099172	BX000701.1	zmp_ph198_A10r	het_t3_het_baz1	-0.863544
ENSDARG00000099172	BX000701.1	zmp_ph198_B3r	het_t3_het_baz1	-0.946486
ENSDARG00000099172	BX000701.1	zmp_ph198_B7r	het_t3_het_baz1	0.10641
ENSDARG00000099172	BX000701.1	zmp_ph198_C3r	het_t3_het_baz1	-1.14813
ENSDARG00000099172	BX000701.1	zmp_ph198_C9r	het_t3_het_baz1	-0.874553
ENSDARG00000099172	BX000701.1	zmp_ph198_C10r	het_t3_het_baz1	-0.925804
ENSDARG00000099172	BX000701.1	zmp_ph198_D5r	het_t3_het_baz1	-0.959123
ENSDARG00000099172	BX000701.1	zmp_ph198_D9r	het_t3_het_baz1	0.0285751
ENSDARG00000099172	BX000701.1	zmp_ph198_D10r	het_t3_het_baz1	-1.14813
ENSDARG00000099172	BX000701.1	zmp_ph198_D12r	het_t3_het_baz1	-1.14813
ENSDARG00000102565	vasnb	zmp_ph198_A4r	wt_t3_wt_baz1	-0.419606
ENSDARG00000102565	vasnb	zmp_ph198_A5r	wt_t3_wt_baz1	1.26571
ENSDARG00000102565	vasnb	zmp_ph198_A7r	wt_t3_wt_baz1	1.16883
ENSDARG00000102565	vasnb	zmp_ph198_A11r	wt_t3_wt_baz1	0.301592
ENSDARG00000102565	vasnb	zmp_ph198_B6r	wt_t3_wt_baz1	1.35899
ENSDARG00000102565	vasnb	zmp_ph198_C1r	wt_t3_wt_baz1	0.660928
ENSDARG00000102565	vasnb	zmp_ph198_C2r	wt_t3_wt_baz1	0.31319
ENSDARG00000102565	vasnb	zmp_ph198_C4r	wt_t3_wt_baz1	2.91958
ENSDARG00000102565	vasnb	zmp_ph198_C11r	wt_t3_wt_baz1	1.28177
ENSDARG00000102565	vasnb	zmp_ph198_D1r	wt_t3_wt_baz1	0.682778
ENSDARG00000102565	vasnb	zmp_ph198_D2r	wt_t3_wt_baz1	0.497037
ENSDARG00000102565	vasnb	zmp_ph198_D3r	wt_t3_wt_baz1	1.08207
ENSDARG00000102565	vasnb	zmp_ph198_A3r	het_t3_wt_baz1	0.801879
ENSDARG00000102565	vasnb	zmp_ph198_B2r	het_t3_wt_baz1	0.842224
ENSDARG00000102565	vasnb	zmp_ph198_B8r	het_t3_wt_baz1	-1.61264
ENSDARG00000102565	vasnb	zmp_ph198_B9r	het_t3_wt_baz1	2.10837
ENSDARG00000102565	vasnb	zmp_ph198_B10r	het_t3_wt_baz1	-0.339017
ENSDARG00000102565	vasnb	zmp_ph198_B11r	het_t3_wt_baz1	-0.627634
ENSDARG00000102565	vasnb	zmp_ph198_C5r	het_t3_wt_baz1	-0.224744
ENSDARG00000102565	vasnb	zmp_ph198_C8r	het_t3_wt_baz1	-0.453648
ENSDARG00000102565	vasnb	zmp_ph198_D7r	het_t3_wt_baz1	-0.235221
ENSDARG00000102565	vasnb	zmp_ph198_D11r	het_t3_wt_baz1	0.0810616
ENSDARG00000102565	vasnb	zmp_ph198_E2r	het_t3_wt_baz1	1.60796
ENSDARG00000102565	vasnb	zmp_ph198_E4r	het_t3_wt_baz1	0.208622
ENSDARG00000102565	vasnb	zmp_ph198_A9r	wt_t3_het_baz1	-0.562882
ENSDARG00000102565	vasnb	zmp_ph198_B4r	wt_t3_het_baz1	0.12436
ENSDARG00000102565	vasnb	zmp_ph198_B5r	wt_t3_het_baz1	-0.358154
ENSDARG00000102565	vasnb	zmp_ph198_C6r	wt_t3_het_baz1	0.174816
ENSDARG00000102565	vasnb	zmp_ph198_D4r	wt_t3_het_baz1	-0.650461
ENSDARG00000102565	vasnb	zmp_ph198_D6r	wt_t3_het_baz1	-0.360311
ENSDARG00000102565	vasnb	zmp_ph198_D8r	wt_t3_het_baz1	0.422663
ENSDARG00000102565	vasnb	zmp_ph198_E3r	wt_t3_het_baz1	0.251389
ENSDARG00000102565	vasnb	zmp_ph198_E6r	wt_t3_het_baz1	0.172331
ENSDARG00000102565	vasnb	zmp_ph198_E11r	wt_t3_het_baz1	-1.22028
ENSDARG00000102565	vasnb	zmp_ph198_E12r	wt_t3_het_baz1	-0.301078
ENSDARG00000102565	vasnb	zmp_ph198_F1r	wt_t3_het_baz1	0.256204
ENSDARG00000102565	vasnb	zmp_ph198_A6r	het_t3_het_baz1	-0.946975
ENSDARG00000102565	vasnb	zmp_ph198_A8r	het_t3_het_baz1	-1.6654
ENSDARG00000102565	vasnb	zmp_ph198_A10r	het_t3_het_baz1	0.299273
ENSDARG00000102565	vasnb	zmp_ph198_B3r	het_t3_het_baz1	-0.946308
ENSDARG00000102565	vasnb	zmp_ph198_B7r	het_t3_het_baz1	-0.654776
ENSDARG00000102565	vasnb	zmp_ph198_C3r	het_t3_het_baz1	-1.17786
ENSDARG00000102565	vasnb	zmp_ph198_C9r	het_t3_het_baz1	0.0997301
ENSDARG00000102565	vasnb	zmp_ph198_C10r	het_t3_het_baz1	-1.03399
ENSDARG00000102565	vasnb	zmp_ph198_D5r	het_t3_het_baz1	-1.17178
ENSDARG00000102565	vasnb	zmp_ph198_D9r	het_t3_het_baz1	-1.11365
ENSDARG00000102565	vasnb	zmp_ph198_D10r	het_t3_het_baz1	-1.20074
ENSDARG00000102565	vasnb	zmp_ph198_D12r	het_t3_het_baz1	-1.7062
ENSDARG00000002564	syngr1a	zmp_ph198_A4r	wt_t3_wt_baz1	1.88232
ENSDARG00000002564	syngr1a	zmp_ph198_A5r	wt_t3_wt_baz1	-0.370867
ENSDARG00000002564	syngr1a	zmp_ph198_A7r	wt_t3_wt_baz1	-0.551955
ENSDARG00000002564	syngr1a	zmp_ph198_A11r	wt_t3_wt_baz1	1.29613
ENSDARG00000002564	syngr1a	zmp_ph198_B6r	wt_t3_wt_baz1	1.04542
ENSDARG00000002564	syngr1a	zmp_ph198_C1r	wt_t3_wt_baz1	-0.0606452
ENSDARG00000002564	syngr1a	zmp_ph198_C2r	wt_t3_wt_baz1	0.0607902
ENSDARG00000002564	syngr1a	zmp_ph198_C4r	wt_t3_wt_baz1	2.22145
ENSDARG00000002564	syngr1a	zmp_ph198_C11r	wt_t3_wt_baz1	0.749425
ENSDARG00000002564	syngr1a	zmp_ph198_D1r	wt_t3_wt_baz1	2.21721
ENSDARG00000002564	syngr1a	zmp_ph198_D2r	wt_t3_wt_baz1	0.151863
ENSDARG00000002564	syngr1a	zmp_ph198_D3r	wt_t3_wt_baz1	1.99615
ENSDARG00000002564	syngr1a	zmp_ph198_A3r	het_t3_wt_baz1	0.355917
ENSDARG00000002564	syngr1a	zmp_ph198_B2r	het_t3_wt_baz1	0.345548
ENSDARG00000002564	syngr1a	zmp_ph198_B8r	het_t3_wt_baz1	-0.270544
ENSDARG00000002564	syngr1a	zmp_ph198_B9r	het_t3_wt_baz1	-0.267664
ENSDARG00000002564	syngr1a	zmp_ph198_B10r	het_t3_wt_baz1	0.610077
ENSDARG00000002564	syngr1a	zmp_ph198_B11r	het_t3_wt_baz1	-0.877442
ENSDARG00000002564	syngr1a	zmp_ph198_C5r	het_t3_wt_baz1	-0.293252
ENSDARG00000002564	syngr1a	zmp_ph198_C8r	het_t3_wt_baz1	-1.11435
ENSDARG00000002564	syngr1a	zmp_ph198_D7r	het_t3_wt_baz1	1.74015
ENSDARG00000002564	syngr1a	zmp_ph198_D11r	het_t3_wt_baz1	0.000468265
ENSDARG00000002564	syngr1a	zmp_ph198_E2r	het_t3_wt_baz1	-0.113069
ENSDARG00000002564	syngr1a	zmp_ph198_E4r	het_t3_wt_baz1	1.72399
ENSDARG00000002564	syngr1a	zmp_ph198_A9r	wt_t3_het_baz1	1.06725
ENSDARG00000002564	syngr1a	zmp_ph198_B4r	wt_t3_het_baz1	-0.816974
ENSDARG00000002564	syngr1a	zmp_ph198_B5r	wt_t3_het_baz1	0.0747186
ENSDARG00000002564	syngr1a	zmp_ph198_C6r	wt_t3_het_baz1	0.314105
ENSDARG00000002564	syngr1a	zmp_ph198_D4r	wt_t3_het_baz1	-0.205835
ENSDARG00000002564	syngr1a	zmp_ph198_D6r	wt_t3_het_baz1	-0.310913
ENSDARG00000002564	syngr1a	zmp_ph198_D8r	wt_t3_het_baz1	-1.37946
ENSDARG00000002564	syngr1a	zmp_ph198_E3r	wt_t3_het_baz1	-0.137742
ENSDARG00000002564	syngr1a	zmp_ph198_E6r	wt_t3_het_baz1	-0.388956
ENSDARG00000002564	syngr1a	zmp_ph198_E11r	wt_t3_het_baz1	0.958205
ENSDARG00000002564	syngr1a	zmp_ph198_E12r	wt_t3_het_baz1	-0.672014
ENSDARG00000002564	syngr1a	zmp_ph198_F1r	wt_t3_het_baz1	-0.250017
ENSDARG00000002564	syngr1a	zmp_ph198_A6r	het_t3_het_baz1	-0.342791
ENSDARG00000002564	syngr1a	zmp_ph198_A8r	het_t3_het_baz1	-1.37946
ENSDARG00000002564	syngr1a	zmp_ph198_A10r	het_t3_het_baz1	-1.37946
ENSDARG00000002564	syngr1a	zmp_ph198_B3r	het_t3_het_baz1	-0.807289
ENSDARG00000002564	syngr1a	zmp_ph198_B7r	het_t3_het_baz1	-0.616655
ENSDARG00000002564	syngr1a	zmp_ph198_C3r	het_t3_het_baz1	-0.349211
ENSDARG00000002564	syngr1a	zmp_ph198_C9r	het_t3_het_baz1	-0.603179
ENSDARG00000002564	syngr1a	zmp_ph198_C10r	het_t3_het_baz1	-0.748604
ENSDARG00000002564	syngr1a	zmp_ph198_D5r	het_t3_het_baz1	-1.37946
ENSDARG00000002564	syngr1a	zmp_ph198_D9r	het_t3_het_baz1	-1.37946
ENSDARG00000002564	syngr1a	zmp_ph198_D10r	het_t3_het_baz1	-1.04115
ENSDARG00000002564	syngr1a	zmp_ph198_D12r	het_t3_het_baz1	-0.702791
ENSDARG00000074752	hlfa	zmp_ph198_A4r	wt_t3_wt_baz1	-0.150156
ENSDARG00000074752	hlfa	zmp_ph198_A5r	wt_t3_wt_baz1	-0.0441277
ENSDARG00000074752	hlfa	zmp_ph198_A7r	wt_t3_wt_baz1	2.79852
ENSDARG00000074752	hlfa	zmp_ph198_A11r	wt_t3_wt_baz1	1.04357
ENSDARG00000074752	hlfa	zmp_ph198_B6r	wt_t3_wt_baz1	-0.376776
ENSDARG00000074752	hlfa	zmp_ph198_C1r	wt_t3_wt_baz1	1.05666
ENSDARG00000074752	hlfa	zmp_ph198_C2r	wt_t3_wt_baz1	-1.04635
ENSDARG00000074752	hlfa	zmp_ph198_C4r	wt_t3_wt_baz1	1.04071
ENSDARG00000074752	hlfa	zmp_ph198_C11r	wt_t3_wt_baz1	0.821776
ENSDARG00000074752	hlfa	zmp_ph198_D1r	wt_t3_wt_baz1	1.98246
ENSDARG00000074752	hlfa	zmp_ph198_D2r	wt_t3_wt_baz1	0.729969
ENSDARG00000074752	hlfa	zmp_ph198_D3r	wt_t3_wt_baz1	1.69562
ENSDARG00000074752	hlfa	zmp_ph198_A3r	het_t3_wt_baz1	0.190802
ENSDARG00000074752	hlfa	zmp_ph198_B2r	het_t3_wt_baz1	0.294788
ENSDARG00000074752	hlfa	zmp_ph198_B8r	het_t3_wt_baz1	0.157794
ENSDARG00000074752	hlfa	zmp_ph198_B9r	het_t3_wt_baz1	-0.762214
ENSDARG00000074752	hlfa	zmp_ph198_B10r	het_t3_wt_baz1	0.441024
ENSDARG00000074752	hlfa	zmp_ph198_B11r	het_t3_wt_baz1	-0.682785
ENSDARG00000074752	hlfa	zmp_ph198_C5r	het_t3_wt_baz1	-0.876776
ENSDARG00000074752	hlfa	zmp_ph198_C8r	het_t3_wt_baz1	-0.417118
ENSDARG00000074752	hlfa	zmp_ph198_D7r	het_t3_wt_baz1	-1.16109
ENSDARG00000074752	hlfa	zmp_ph198_D11r	het_t3_wt_baz1	-0.160707
ENSDARG00000074752	hlfa	zmp_ph198_E2r	het_t3_wt_baz1	0.639702
ENSDARG00000074752	hlfa	zmp_ph198_E4r	het_t3_wt_baz1	0.4491
ENSDARG00000074752	hlfa	zmp_ph198_A9r	wt_t3_het_baz1	0.470582
ENSDARG00000074752	hlfa	zmp_ph198_B4r	wt_t3_het_baz1	0.938133
ENSDARG00000074752	hlfa	zmp_ph198_B5r	wt_t3_het_baz1	0.569198
ENSDARG00000074752	hlfa	zmp_ph198_C6r	wt_t3_het_baz1	0.503376
ENSDARG00000074752	hlfa	zmp_ph198_D4r	wt_t3_het_baz1	0.290248
ENSDARG00000074752	hlfa	zmp_ph198_D6r	wt_t3_het_baz1	-1.051
ENSDARG00000074752	hlfa	zmp_ph198_D8r	wt_t3_het_baz1	-1.43952
ENSDARG00000074752	hlfa	zmp_ph198_E3r	wt_t3_het_baz1	0.436956
ENSDARG00000074752	hlfa	zmp_ph198_E6r	wt_t3_het_baz1	1.52951
ENSDARG00000074752	hlfa	zmp_ph198_E11r	wt_t3_het_baz1	-1.32461
ENSDARG00000074752	hlfa	zmp_ph198_E12r	wt_t3_het_baz1	-0.471001
ENSDARG00000074752	hlfa	zmp_ph198_F1r	wt_t3_het_baz1	1.1478
ENSDARG00000074752	hlfa	zmp_ph198_A6r	het_t3_het_baz1	0.293216
ENSDARG00000074752	hlfa	zmp_ph198_A8r	het_t3_het_baz1	-1.26323
ENSDARG00000074752	hlfa	zmp_ph198_A10r	het_t3_het_baz1	-0.694323
ENSDARG00000074752	hlfa	zmp_ph198_B3r	het_t3_het_baz1	-0.195757
ENSDARG00000074752	hlfa	zmp_ph198_B7r	het_t3_het_baz1	-0.0238041
ENSDARG00000074752	hlfa	zmp_ph198_C3r	het_t3_het_baz1	-1.60253
ENSDARG00000074752	hlfa	zmp_ph198_C9r	het_t3_het_baz1	-0.722231
ENSDARG00000074752	hlfa	zmp_ph198_C10r	het_t3_het_baz1	-0.686483
ENSDARG00000074752	hlfa	zmp_ph198_D5r	het_t3_het_baz1	-0.728935
ENSDARG00000074752	hlfa	zmp_ph198_D9r	het_t3_het_baz1	-1.67855
ENSDARG00000074752	hlfa	zmp_ph198_D10r	het_t3_het_baz1	-0.487216
ENSDARG00000074752	hlfa	zmp_ph198_D12r	het_t3_het_baz1	-1.47422
ENSDARG00000089616	coro7	zmp_ph198_A4r	wt_t3_wt_baz1	0.0226236
ENSDARG00000089616	coro7	zmp_ph198_A5r	wt_t3_wt_baz1	2.23496
ENSDARG00000089616	coro7	zmp_ph198_A7r	wt_t3_wt_baz1	-0.301969
ENSDARG00000089616	coro7	zmp_ph198_A11r	wt_t3_wt_baz1	-0.380757
ENSDARG00000089616	coro7	zmp_ph198_B6r	wt_t3_wt_baz1	1.44162
ENSDARG00000089616	coro7	zmp_ph198_C1r	wt_t3_wt_baz1	0.421843
ENSDARG00000089616	coro7	zmp_ph198_C2r	wt_t3_wt_baz1	-0.821813
ENSDARG00000089616	coro7	zmp_ph198_C4r	wt_t3_wt_baz1	1.91378
ENSDARG00000089616	coro7	zmp_ph198_C11r	wt_t3_wt_baz1	3.27512
ENSDARG00000089616	coro7	zmp_ph198_D1r	wt_t3_wt_baz1	1.44625
ENSDARG00000089616	coro7	zmp_ph198_D2r	wt_t3_wt_baz1	1.21538
ENSDARG00000089616	coro7	zmp_ph198_D3r	wt_t3_wt_baz1	-0.0577861
ENSDARG00000089616	coro7	zmp_ph198_A3r	het_t3_wt_baz1	1.31441
ENSDARG00000089616	coro7	zmp_ph198_B2r	het_t3_wt_baz1	-0.617498
ENSDARG00000089616	coro7	zmp_ph198_B8r	het_t3_wt_baz1	0.203652
ENSDARG00000089616	coro7	zmp_ph198_B9r	het_t3_wt_baz1	-0.718556
ENSDARG00000089616	coro7	zmp_ph198_B10r	het_t3_wt_baz1	0.652888
ENSDARG00000089616	coro7	zmp_ph198_B11r	het_t3_wt_baz1	0.545951
ENSDARG00000089616	coro7	zmp_ph198_C5r	het_t3_wt_baz1	0.247531
ENSDARG00000089616	coro7	zmp_ph198_C8r	het_t3_wt_baz1	-0.894315
ENSDARG00000089616	coro7	zmp_ph198_D7r	het_t3_wt_baz1	-0.627246
ENSDARG00000089616	coro7	zmp_ph198_D11r	het_t3_wt_baz1	-0.186446
ENSDARG00000089616	coro7	zmp_ph198_E2r	het_t3_wt_baz1	0.773965
ENSDARG00000089616	coro7	zmp_ph198_E4r	het_t3_wt_baz1	0.172122
ENSDARG00000089616	coro7	zmp_ph198_A9r	wt_t3_het_baz1	-0.571669
ENSDARG00000089616	coro7	zmp_ph198_B4r	wt_t3_het_baz1	-0.242647
ENSDARG00000089616	coro7	zmp_ph198_B5r	wt_t3_het_baz1	-0.851453
ENSDARG00000089616	coro7	zmp_ph198_C6r	wt_t3_het_baz1	1.20353
ENSDARG00000089616	coro7	zmp_ph198_D4r	wt_t3_het_baz1	-0.84717
ENSDARG00000089616	coro7	zmp_ph198_D6r	wt_t3_het_baz1	-1.33603
ENSDARG00000089616	coro7	zmp_ph198_D8r	wt_t3_het_baz1	-0.314847
ENSDARG00000089616	coro7	zmp_ph198_E3r	wt_t3_het_baz1	0.525968
ENSDARG00000089616	coro7	zmp_ph198_E6r	wt_t3_het_baz1	-0.235812
ENSDARG00000089616	coro7	zmp_ph198_E11r	wt_t3_het_baz1	-0.362304
ENSDARG00000089616	coro7	zmp_ph198_E12r	wt_t3_het_baz1	0.432035
ENSDARG00000089616	coro7	zmp_ph198_F1r	wt_t3_het_baz1	-0.0814827
ENSDARG00000089616	coro7	zmp_ph198_A6r	het_t3_het_baz1	-1.12012
ENSDARG00000089616	coro7	zmp_ph198_A8r	het_t3_het_baz1	-0.993925
ENSDARG00000089616	coro7	zmp_ph198_A10r	het_t3_het_baz1	-0.663306
ENSDARG00000089616	coro7	zmp_ph198_B3r	het_t3_het_baz1	-0.859367
ENSDARG00000089616	coro7	zmp_ph198_B7r	het_t3_het_baz1	0.570389
ENSDARG00000089616	coro7	zmp_ph198_C3r	het_t3_het_baz1	-1.33603
ENSDARG00000089616	coro7	zmp_ph198_C9r	het_t3_het_baz1	-0.0426302
ENSDARG00000089616	coro7	zmp_ph198_C10r	het_t3_het_baz1	-0.284929
ENSDARG00000089616	coro7	zmp_ph198_D5r	het_t3_het_baz1	-0.889239
ENSDARG00000089616	coro7	zmp_ph198_D9r	het_t3_het_baz1	-1.33603
ENSDARG00000089616	coro7	zmp_ph198_D10r	het_t3_het_baz1	-0.490514
ENSDARG00000089616	coro7	zmp_ph198_D12r	het_t3_het_baz1	-1.14812
ENSDARG00000044769	kctd13	zmp_ph198_A4r	wt_t3_wt_baz1	0.290009
ENSDARG00000044769	kctd13	zmp_ph198_A5r	wt_t3_wt_baz1	1.60304
ENSDARG00000044769	kctd13	zmp_ph198_A7r	wt_t3_wt_baz1	0.504416
ENSDARG00000044769	kctd13	zmp_ph198_A11r	wt_t3_wt_baz1	-1.16881
ENSDARG00000044769	kctd13	zmp_ph198_B6r	wt_t3_wt_baz1	-0.533293
ENSDARG00000044769	kctd13	zmp_ph198_C1r	wt_t3_wt_baz1	0.23488
ENSDARG00000044769	kctd13	zmp_ph198_C2r	wt_t3_wt_baz1	0.241436
ENSDARG00000044769	kctd13	zmp_ph198_C4r	wt_t3_wt_baz1	2.36111
ENSDARG00000044769	kctd13	zmp_ph198_C11r	wt_t3_wt_baz1	0.783661
ENSDARG00000044769	kctd13	zmp_ph198_D1r	wt_t3_wt_baz1	0.986151
ENSDARG00000044769	kctd13	zmp_ph198_D2r	wt_t3_wt_baz1	0.533555
ENSDARG00000044769	kctd13	zmp_ph198_D3r	wt_t3_wt_baz1	1.64183
ENSDARG00000044769	kctd13	zmp_ph198_A3r	het_t3_wt_baz1	-0.179984
ENSDARG00000044769	kctd13	zmp_ph198_B2r	het_t3_wt_baz1	1.76017
ENSDARG00000044769	kctd13	zmp_ph198_B8r	het_t3_wt_baz1	-1.10668
ENSDARG00000044769	kctd13	zmp_ph198_B9r	het_t3_wt_baz1	0.332761
ENSDARG00000044769	kctd13	zmp_ph198_B10r	het_t3_wt_baz1	0.408409
ENSDARG00000044769	kctd13	zmp_ph198_B11r	het_t3_wt_baz1	-0.603337
ENSDARG00000044769	kctd13	zmp_ph198_C5r	het_t3_wt_baz1	-0.817895
ENSDARG00000044769	kctd13	zmp_ph198_C8r	het_t3_wt_baz1	-0.845998
ENSDARG00000044769	kctd13	zmp_ph198_D7r	het_t3_wt_baz1	1.02178
ENSDARG00000044769	kctd13	zmp_ph198_D11r	het_t3_wt_baz1	-0.163106
ENSDARG00000044769	kctd13	zmp_ph198_E2r	het_t3_wt_baz1	0.222672
ENSDARG00000044769	kctd13	zmp_ph198_E4r	het_t3_wt_baz1	-0.560906
ENSDARG00000044769	kctd13	zmp_ph198_A9r	wt_t3_het_baz1	-0.00119562
ENSDARG00000044769	kctd13	zmp_ph198_B4r	wt_t3_het_baz1	-0.639292
ENSDARG00000044769	kctd13	zmp_ph198_B5r	wt_t3_het_baz1	1.09893
ENSDARG00000044769	kctd13	zmp_ph198_C6r	wt_t3_het_baz1	0.213928
ENSDARG00000044769	kctd13	zmp_ph198_D4r	wt_t3_het_baz1	-0.0825528
ENSDARG00000044769	kctd13	zmp_ph198_D6r	wt_t3_het_baz1	-0.966645
ENSDARG00000044769	kctd13	zmp_ph198_D8r	wt_t3_het_baz1	3.04798
ENSDARG00000044769	kctd13	zmp_ph198_E3r	wt_t3_het_baz1	-0.618194
ENSDARG00000044769	kctd13	zmp_ph198_E6r	wt_t3_het_baz1	-0.402138
ENSDARG00000044769	kctd13	zmp_ph198_E11r	wt_t3_het_baz1	-0.869422
ENSDARG00000044769	kctd13	zmp_ph198_E12r	wt_t3_het_baz1	0.31215
ENSDARG00000044769	kctd13	zmp_ph198_F1r	wt_t3_het_baz1	0.461075
ENSDARG00000044769	kctd13	zmp_ph198_A6r	het_t3_het_baz1	-1.43724
ENSDARG00000044769	kctd13	zmp_ph198_A8r	het_t3_het_baz1	-1.10681
ENSDARG00000044769	kctd13	zmp_ph198_A10r	het_t3_het_baz1	-0.828275
ENSDARG00000044769	kctd13	zmp_ph198_B3r	het_t3_het_baz1	-1.23985
ENSDARG00000044769	kctd13	zmp_ph198_B7r	het_t3_het_baz1	-0.153789
ENSDARG00000044769	kctd13	zmp_ph198_C3r	het_t3_het_baz1	0.244704
ENSDARG00000044769	kctd13	zmp_ph198_C9r	het_t3_het_baz1	-0.309271
ENSDARG00000044769	kctd13	zmp_ph198_C10r	het_t3_het_baz1	-1.31452
ENSDARG00000044769	kctd13	zmp_ph198_D5r	het_t3_het_baz1	-1.02768
ENSDARG00000044769	kctd13	zmp_ph198_D9r	het_t3_het_baz1	0.627443
ENSDARG00000044769	kctd13	zmp_ph198_D10r	het_t3_het_baz1	-0.772637
ENSDARG00000044769	kctd13	zmp_ph198_D12r	het_t3_het_baz1	-1.18255
ENSDARG00000084991	RF00091	zmp_ph198_A4r	wt_t3_wt_baz1	-1.13536
ENSDARG00000084991	RF00091	zmp_ph198_A5r	wt_t3_wt_baz1	-1.13536
ENSDARG00000084991	RF00091	zmp_ph198_A7r	wt_t3_wt_baz1	-1.13536
ENSDARG00000084991	RF00091	zmp_ph198_A11r	wt_t3_wt_baz1	-1.13536
ENSDARG00000084991	RF00091	zmp_ph198_B6r	wt_t3_wt_baz1	-1.13536
ENSDARG00000084991	RF00091	zmp_ph198_C1r	wt_t3_wt_baz1	-1.13536
ENSDARG00000084991	RF00091	zmp_ph198_C2r	wt_t3_wt_baz1	-1.13536
ENSDARG00000084991	RF00091	zmp_ph198_C4r	wt_t3_wt_baz1	-1.13536
ENSDARG00000084991	RF00091	zmp_ph198_C11r	wt_t3_wt_baz1	-1.13536
ENSDARG00000084991	RF00091	zmp_ph198_D1r	wt_t3_wt_baz1	-1.13536
ENSDARG00000084991	RF00091	zmp_ph198_D2r	wt_t3_wt_baz1	-1.13536
ENSDARG00000084991	RF00091	zmp_ph198_D3r	wt_t3_wt_baz1	-1.13536
ENSDARG00000084991	RF00091	zmp_ph198_A3r	het_t3_wt_baz1	-0.00792401
ENSDARG00000084991	RF00091	zmp_ph198_B2r	het_t3_wt_baz1	0.545691
ENSDARG00000084991	RF00091	zmp_ph198_B8r	het_t3_wt_baz1	1.2661
ENSDARG00000084991	RF00091	zmp_ph198_B9r	het_t3_wt_baz1	0.550029
ENSDARG00000084991	RF00091	zmp_ph198_B10r	het_t3_wt_baz1	-0.359826
ENSDARG00000084991	RF00091	zmp_ph198_B11r	het_t3_wt_baz1	0.82154
ENSDARG00000084991	RF00091	zmp_ph198_C5r	het_t3_wt_baz1	0.0995893
ENSDARG00000084991	RF00091	zmp_ph198_C8r	het_t3_wt_baz1	0.587003
ENSDARG00000084991	RF00091	zmp_ph198_D7r	het_t3_wt_baz1	-0.951113
ENSDARG00000084991	RF00091	zmp_ph198_D11r	het_t3_wt_baz1	0.209404
ENSDARG00000084991	RF00091	zmp_ph198_E2r	het_t3_wt_baz1	-0.723989
ENSDARG00000084991	RF00091	zmp_ph198_E4r	het_t3_wt_baz1	-0.12724
ENSDARG00000084991	RF00091	zmp_ph198_A9r	wt_t3_het_baz1	0.255518
ENSDARG00000084991	RF00091	zmp_ph198_B4r	wt_t3_het_baz1	-0.0390572
ENSDARG00000084991	RF00091	zmp_ph198_B5r	wt_t3_het_baz1	-0.946413
ENSDARG00000084991	RF00091	zmp_ph198_C6r	wt_t3_het_baz1	-0.0350881
ENSDARG00000084991	RF00091	zmp_ph198_D4r	wt_t3_het_baz1	-0.754123
ENSDARG00000084991	RF00091	zmp_ph198_D6r	wt_t3_het_baz1	1.41009
ENSDARG00000084991	RF00091	zmp_ph198_D8r	wt_t3_het_baz1	0.457391
ENSDARG00000084991	RF00091	zmp_ph198_E3r	wt_t3_het_baz1	-0.167301
ENSDARG00000084991	RF00091	zmp_ph198_E6r	wt_t3_het_baz1	-0.92086
ENSDARG00000084991	RF00091	zmp_ph198_E11r	wt_t3_het_baz1	-0.122874
ENSDARG00000084991	RF00091	zmp_ph198_E12r	wt_t3_het_baz1	-0.905556
ENSDARG00000084991	RF00091	zmp_ph198_F1r	wt_t3_het_baz1	0.332189
ENSDARG00000084991	RF00091	zmp_ph198_A6r	het_t3_het_baz1	3.2424
ENSDARG00000084991	RF00091	zmp_ph198_A8r	het_t3_het_baz1	1.79935
ENSDARG00000084991	RF00091	zmp_ph198_A10r	het_t3_het_baz1	0.700834
ENSDARG00000084991	RF00091	zmp_ph198_B3r	het_t3_het_baz1	0.351547
ENSDARG00000084991	RF00091	zmp_ph198_B7r	het_t3_het_baz1	1.34253
ENSDARG00000084991	RF00091	zmp_ph198_C3r	het_t3_het_baz1	0.872631
ENSDARG00000084991	RF00091	zmp_ph198_C9r	het_t3_het_baz1	0.503722
ENSDARG00000084991	RF00091	zmp_ph198_C10r	het_t3_het_baz1	0.708981
ENSDARG00000084991	RF00091	zmp_ph198_D5r	het_t3_het_baz1	1.12944
ENSDARG00000084991	RF00091	zmp_ph198_D9r	het_t3_het_baz1	1.03385
ENSDARG00000084991	RF00091	zmp_ph198_D10r	het_t3_het_baz1	0.842782
ENSDARG00000084991	RF00091	zmp_ph198_D12r	het_t3_het_baz1	0.623107
ENSDARG00000104178	trir	zmp_ph198_A4r	wt_t3_wt_baz1	-1.08205
ENSDARG00000104178	trir	zmp_ph198_A5r	wt_t3_wt_baz1	-1.08205
ENSDARG00000104178	trir	zmp_ph198_A7r	wt_t3_wt_baz1	-1.08205
ENSDARG00000104178	trir	zmp_ph198_A11r	wt_t3_wt_baz1	-0.125875
ENSDARG00000104178	trir	zmp_ph198_B6r	wt_t3_wt_baz1	-0.576545
ENSDARG00000104178	trir	zmp_ph198_C1r	wt_t3_wt_baz1	-1.08205
ENSDARG00000104178	trir	zmp_ph198_C2r	wt_t3_wt_baz1	-1.08205
ENSDARG00000104178	trir	zmp_ph198_C4r	wt_t3_wt_baz1	-1.08205
ENSDARG00000104178	trir	zmp_ph198_C11r	wt_t3_wt_baz1	-1.08205
ENSDARG00000104178	trir	zmp_ph198_D1r	wt_t3_wt_baz1	-1.08205
ENSDARG00000104178	trir	zmp_ph198_D2r	wt_t3_wt_baz1	-1.08205
ENSDARG00000104178	trir	zmp_ph198_D3r	wt_t3_wt_baz1	-0.826159
ENSDARG00000104178	trir	zmp_ph198_A3r	het_t3_wt_baz1	0.606191
ENSDARG00000104178	trir	zmp_ph198_B2r	het_t3_wt_baz1	0.835841
ENSDARG00000104178	trir	zmp_ph198_B8r	het_t3_wt_baz1	-0.157368
ENSDARG00000104178	trir	zmp_ph198_B9r	het_t3_wt_baz1	-0.154966
ENSDARG00000104178	trir	zmp_ph198_B10r	het_t3_wt_baz1	-1.08205
ENSDARG00000104178	trir	zmp_ph198_B11r	het_t3_wt_baz1	-0.0355169
ENSDARG00000104178	trir	zmp_ph198_C5r	het_t3_wt_baz1	0.27657
ENSDARG00000104178	trir	zmp_ph198_C8r	het_t3_wt_baz1	1.1286
ENSDARG00000104178	trir	zmp_ph198_D7r	het_t3_wt_baz1	0.336855
ENSDARG00000104178	trir	zmp_ph198_D11r	het_t3_wt_baz1	-0.219048
ENSDARG00000104178	trir	zmp_ph198_E2r	het_t3_wt_baz1	-0.554052
ENSDARG00000104178	trir	zmp_ph198_E4r	het_t3_wt_baz1	-0.650742
ENSDARG00000104178	trir	zmp_ph198_A9r	wt_t3_het_baz1	0.193087
ENSDARG00000104178	trir	zmp_ph198_B4r	wt_t3_het_baz1	0.012365
ENSDARG00000104178	trir	zmp_ph198_B5r	wt_t3_het_baz1	-0.111983
ENSDARG00000104178	trir	zmp_ph198_C6r	wt_t3_het_baz1	-0.51717
ENSDARG00000104178	trir	zmp_ph198_D4r	wt_t3_het_baz1	-0.592729
ENSDARG00000104178	trir	zmp_ph198_D6r	wt_t3_het_baz1	-0.785043
ENSDARG00000104178	trir	zmp_ph198_D8r	wt_t3_het_baz1	-1.08205
ENSDARG00000104178	trir	zmp_ph198_E3r	wt_t3_het_baz1	0.574623
ENSDARG00000104178	trir	zmp_ph198_E6r	wt_t3_het_baz1	-0.531421
ENSDARG00000104178	trir	zmp_ph198_E11r	wt_t3_het_baz1	-0.757168
ENSDARG00000104178	trir	zmp_ph198_E12r	wt_t3_het_baz1	-0.197182
ENSDARG00000104178	trir	zmp_ph198_F1r	wt_t3_het_baz1	0.173682
ENSDARG00000104178	trir	zmp_ph198_A6r	het_t3_het_baz1	0.214607
ENSDARG00000104178	trir	zmp_ph198_A8r	het_t3_het_baz1	1.65736
ENSDARG00000104178	trir	zmp_ph198_A10r	het_t3_het_baz1	1.61138
ENSDARG00000104178	trir	zmp_ph198_B3r	het_t3_het_baz1	2.73484
ENSDARG00000104178	trir	zmp_ph198_B7r	het_t3_het_baz1	0.402121
ENSDARG00000104178	trir	zmp_ph198_C3r	het_t3_het_baz1	0.636119
ENSDARG00000104178	trir	zmp_ph198_C9r	het_t3_het_baz1	1.83085
ENSDARG00000104178	trir	zmp_ph198_C10r	het_t3_het_baz1	2.07423
ENSDARG00000104178	trir	zmp_ph198_D5r	het_t3_het_baz1	1.60121
ENSDARG00000104178	trir	zmp_ph198_D9r	het_t3_het_baz1	1.70213
ENSDARG00000104178	trir	zmp_ph198_D10r	het_t3_het_baz1	-0.51784
ENSDARG00000104178	trir	zmp_ph198_D12r	het_t3_het_baz1	0.610693
ENSDARG00000103923	tfap4	zmp_ph198_A4r	wt_t3_wt_baz1	-0.706135
ENSDARG00000103923	tfap4	zmp_ph198_A5r	wt_t3_wt_baz1	0.945326
ENSDARG00000103923	tfap4	zmp_ph198_A7r	wt_t3_wt_baz1	-1.10553
ENSDARG00000103923	tfap4	zmp_ph198_A11r	wt_t3_wt_baz1	0.0146738
ENSDARG00000103923	tfap4	zmp_ph198_B6r	wt_t3_wt_baz1	0.23138
ENSDARG00000103923	tfap4	zmp_ph198_C1r	wt_t3_wt_baz1	-0.694333
ENSDARG00000103923	tfap4	zmp_ph198_C2r	wt_t3_wt_baz1	-0.994499
ENSDARG00000103923	tfap4	zmp_ph198_C4r	wt_t3_wt_baz1	-0.709803
ENSDARG00000103923	tfap4	zmp_ph198_C11r	wt_t3_wt_baz1	-0.729052
ENSDARG00000103923	tfap4	zmp_ph198_D1r	wt_t3_wt_baz1	-1.08139
ENSDARG00000103923	tfap4	zmp_ph198_D2r	wt_t3_wt_baz1	-0.801282
ENSDARG00000103923	tfap4	zmp_ph198_D3r	wt_t3_wt_baz1	-0.941985
ENSDARG00000103923	tfap4	zmp_ph198_A3r	het_t3_wt_baz1	0.299819
ENSDARG00000103923	tfap4	zmp_ph198_B2r	het_t3_wt_baz1	-0.755409
ENSDARG00000103923	tfap4	zmp_ph198_B8r	het_t3_wt_baz1	-0.56064
ENSDARG00000103923	tfap4	zmp_ph198_B9r	het_t3_wt_baz1	0.1663
ENSDARG00000103923	tfap4	zmp_ph198_B10r	het_t3_wt_baz1	-1.02104
ENSDARG00000103923	tfap4	zmp_ph198_B11r	het_t3_wt_baz1	-0.25752
ENSDARG00000103923	tfap4	zmp_ph198_C5r	het_t3_wt_baz1	-0.434465
ENSDARG00000103923	tfap4	zmp_ph198_C8r	het_t3_wt_baz1	1.89992
ENSDARG00000103923	tfap4	zmp_ph198_D7r	het_t3_wt_baz1	1.5249
ENSDARG00000103923	tfap4	zmp_ph198_D11r	het_t3_wt_baz1	0.607976
ENSDARG00000103923	tfap4	zmp_ph198_E2r	het_t3_wt_baz1	-0.914857
ENSDARG00000103923	tfap4	zmp_ph198_E4r	het_t3_wt_baz1	0.438548
ENSDARG00000103923	tfap4	zmp_ph198_A9r	wt_t3_het_baz1	-0.432934
ENSDARG00000103923	tfap4	zmp_ph198_B4r	wt_t3_het_baz1	-0.751954
ENSDARG00000103923	tfap4	zmp_ph198_B5r	wt_t3_het_baz1	-0.499904
ENSDARG00000103923	tfap4	zmp_ph198_C6r	wt_t3_het_baz1	-0.569677
ENSDARG00000103923	tfap4	zmp_ph198_D4r	wt_t3_het_baz1	-0.815848
ENSDARG00000103923	tfap4	zmp_ph198_D6r	wt_t3_het_baz1	0.984195
ENSDARG00000103923	tfap4	zmp_ph198_D8r	wt_t3_het_baz1	-1.11415
ENSDARG00000103923	tfap4	zmp_ph198_E3r	wt_t3_het_baz1	-0.897424
ENSDARG00000103923	tfap4	zmp_ph198_E6r	wt_t3_het_baz1	0.320433
ENSDARG00000103923	tfap4	zmp_ph198_E11r	wt_t3_het_baz1	0.484465
ENSDARG00000103923	tfap4	zmp_ph198_E12r	wt_t3_het_baz1	-0.120514
ENSDARG00000103923	tfap4	zmp_ph198_F1r	wt_t3_het_baz1	-0.432703
ENSDARG00000103923	tfap4	zmp_ph198_A6r	het_t3_het_baz1	0.370972
ENSDARG00000103923	tfap4	zmp_ph198_A8r	het_t3_het_baz1	3.24269
ENSDARG00000103923	tfap4	zmp_ph198_A10r	het_t3_het_baz1	1.46848
ENSDARG00000103923	tfap4	zmp_ph198_B3r	het_t3_het_baz1	-0.760544
ENSDARG00000103923	tfap4	zmp_ph198_B7r	het_t3_het_baz1	2.1743
ENSDARG00000103923	tfap4	zmp_ph198_C3r	het_t3_het_baz1	-0.648427
ENSDARG00000103923	tfap4	zmp_ph198_C9r	het_t3_het_baz1	-0.715267
ENSDARG00000103923	tfap4	zmp_ph198_C10r	het_t3_het_baz1	0.665845
ENSDARG00000103923	tfap4	zmp_ph198_D5r	het_t3_het_baz1	0.969879
ENSDARG00000103923	tfap4	zmp_ph198_D9r	het_t3_het_baz1	0.181306
ENSDARG00000103923	tfap4	zmp_ph198_D10r	het_t3_het_baz1	1.69403
ENSDARG00000103923	tfap4	zmp_ph198_D12r	het_t3_het_baz1	0.78185
ENSDARG00000074231	CU138547.1	zmp_ph198_A4r	wt_t3_wt_baz1	-0.436583
ENSDARG00000074231	CU138547.1	zmp_ph198_A5r	wt_t3_wt_baz1	-1.07096
ENSDARG00000074231	CU138547.1	zmp_ph198_A7r	wt_t3_wt_baz1	-0.266261
ENSDARG00000074231	CU138547.1	zmp_ph198_A11r	wt_t3_wt_baz1	-0.327573
ENSDARG00000074231	CU138547.1	zmp_ph198_B6r	wt_t3_wt_baz1	-0.481447
ENSDARG00000074231	CU138547.1	zmp_ph198_C1r	wt_t3_wt_baz1	-1.07096
ENSDARG00000074231	CU138547.1	zmp_ph198_C2r	wt_t3_wt_baz1	-1.07096
ENSDARG00000074231	CU138547.1	zmp_ph198_C4r	wt_t3_wt_baz1	-1.07096
ENSDARG00000074231	CU138547.1	zmp_ph198_C11r	wt_t3_wt_baz1	-0.242874
ENSDARG00000074231	CU138547.1	zmp_ph198_D1r	wt_t3_wt_baz1	-1.07096
ENSDARG00000074231	CU138547.1	zmp_ph198_D2r	wt_t3_wt_baz1	-1.07096
ENSDARG00000074231	CU138547.1	zmp_ph198_D3r	wt_t3_wt_baz1	-1.07096
ENSDARG00000074231	CU138547.1	zmp_ph198_A3r	het_t3_wt_baz1	-0.508444
ENSDARG00000074231	CU138547.1	zmp_ph198_B2r	het_t3_wt_baz1	-0.511805
ENSDARG00000074231	CU138547.1	zmp_ph198_B8r	het_t3_wt_baz1	0.366848
ENSDARG00000074231	CU138547.1	zmp_ph198_B9r	het_t3_wt_baz1	1.81212
ENSDARG00000074231	CU138547.1	zmp_ph198_B10r	het_t3_wt_baz1	-1.07096
ENSDARG00000074231	CU138547.1	zmp_ph198_B11r	het_t3_wt_baz1	-0.582779
ENSDARG00000074231	CU138547.1	zmp_ph198_C5r	het_t3_wt_baz1	-1.07096
ENSDARG00000074231	CU138547.1	zmp_ph198_C8r	het_t3_wt_baz1	-0.555354
ENSDARG00000074231	CU138547.1	zmp_ph198_D7r	het_t3_wt_baz1	-0.51939
ENSDARG00000074231	CU138547.1	zmp_ph198_D11r	het_t3_wt_baz1	-1.07096
ENSDARG00000074231	CU138547.1	zmp_ph198_E2r	het_t3_wt_baz1	0.16053
ENSDARG00000074231	CU138547.1	zmp_ph198_E4r	het_t3_wt_baz1	-0.567975
ENSDARG00000074231	CU138547.1	zmp_ph198_A9r	wt_t3_het_baz1	0.713503
ENSDARG00000074231	CU138547.1	zmp_ph198_B4r	wt_t3_het_baz1	-1.07096
ENSDARG00000074231	CU138547.1	zmp_ph198_B5r	wt_t3_het_baz1	1.75725
ENSDARG00000074231	CU138547.1	zmp_ph198_C6r	wt_t3_het_baz1	-1.07096
ENSDARG00000074231	CU138547.1	zmp_ph198_D4r	wt_t3_het_baz1	0.070321
ENSDARG00000074231	CU138547.1	zmp_ph198_D6r	wt_t3_het_baz1	2.39271
ENSDARG00000074231	CU138547.1	zmp_ph198_D8r	wt_t3_het_baz1	1.31308
ENSDARG00000074231	CU138547.1	zmp_ph198_E3r	wt_t3_het_baz1	0.378037
ENSDARG00000074231	CU138547.1	zmp_ph198_E6r	wt_t3_het_baz1	0.213315
ENSDARG00000074231	CU138547.1	zmp_ph198_E11r	wt_t3_het_baz1	-0.313214
ENSDARG00000074231	CU138547.1	zmp_ph198_E12r	wt_t3_het_baz1	0.304939
ENSDARG00000074231	CU138547.1	zmp_ph198_F1r	wt_t3_het_baz1	0.393463
ENSDARG00000074231	CU138547.1	zmp_ph198_A6r	het_t3_het_baz1	0.94524
ENSDARG00000074231	CU138547.1	zmp_ph198_A8r	het_t3_het_baz1	0.526378
ENSDARG00000074231	CU138547.1	zmp_ph198_A10r	het_t3_het_baz1	0.499567
ENSDARG00000074231	CU138547.1	zmp_ph198_B3r	het_t3_het_baz1	0.598248
ENSDARG00000074231	CU138547.1	zmp_ph198_B7r	het_t3_het_baz1	-1.07096
ENSDARG00000074231	CU138547.1	zmp_ph198_C3r	het_t3_het_baz1	0.932753
ENSDARG00000074231	CU138547.1	zmp_ph198_C9r	het_t3_het_baz1	-1.07096
ENSDARG00000074231	CU138547.1	zmp_ph198_C10r	het_t3_het_baz1	0.769452
ENSDARG00000074231	CU138547.1	zmp_ph198_D5r	het_t3_het_baz1	1.01517
ENSDARG00000074231	CU138547.1	zmp_ph198_D9r	het_t3_het_baz1	1.3642
ENSDARG00000074231	CU138547.1	zmp_ph198_D10r	het_t3_het_baz1	2.21892
ENSDARG00000074231	CU138547.1	zmp_ph198_D12r	het_t3_het_baz1	1.56112
ENSDARG00000104193	CABZ01019904.1	zmp_ph198_A4r	wt_t3_wt_baz1	0.0168179
ENSDARG00000104193	CABZ01019904.1	zmp_ph198_A5r	wt_t3_wt_baz1	-0.126785
ENSDARG00000104193	CABZ01019904.1	zmp_ph198_A7r	wt_t3_wt_baz1	1.79188
ENSDARG00000104193	CABZ01019904.1	zmp_ph198_A11r	wt_t3_wt_baz1	-0.615901
ENSDARG00000104193	CABZ01019904.1	zmp_ph198_B6r	wt_t3_wt_baz1	-0.615901
ENSDARG00000104193	CABZ01019904.1	zmp_ph198_C1r	wt_t3_wt_baz1	-0.104255
ENSDARG00000104193	CABZ01019904.1	zmp_ph198_C2r	wt_t3_wt_baz1	2.17789
ENSDARG00000104193	CABZ01019904.1	zmp_ph198_C4r	wt_t3_wt_baz1	0.548273
ENSDARG00000104193	CABZ01019904.1	zmp_ph198_C11r	wt_t3_wt_baz1	0.21002
ENSDARG00000104193	CABZ01019904.1	zmp_ph198_D1r	wt_t3_wt_baz1	2.87251
ENSDARG00000104193	CABZ01019904.1	zmp_ph198_D2r	wt_t3_wt_baz1	0.37425
ENSDARG00000104193	CABZ01019904.1	zmp_ph198_D3r	wt_t3_wt_baz1	3.55101
ENSDARG00000104193	CABZ01019904.1	zmp_ph198_A3r	het_t3_wt_baz1	-0.615901
ENSDARG00000104193	CABZ01019904.1	zmp_ph198_B2r	het_t3_wt_baz1	0.499487
ENSDARG00000104193	CABZ01019904.1	zmp_ph198_B8r	het_t3_wt_baz1	-0.615901
ENSDARG00000104193	CABZ01019904.1	zmp_ph198_B9r	het_t3_wt_baz1	-0.615901
ENSDARG00000104193	CABZ01019904.1	zmp_ph198_B10r	het_t3_wt_baz1	-0.615901
ENSDARG00000104193	CABZ01019904.1	zmp_ph198_B11r	het_t3_wt_baz1	-0.615901
ENSDARG00000104193	CABZ01019904.1	zmp_ph198_C5r	het_t3_wt_baz1	-0.615901
ENSDARG00000104193	CABZ01019904.1	zmp_ph198_C8r	het_t3_wt_baz1	-0.615901
ENSDARG00000104193	CABZ01019904.1	zmp_ph198_D7r	het_t3_wt_baz1	-0.0657723
ENSDARG00000104193	CABZ01019904.1	zmp_ph198_D11r	het_t3_wt_baz1	-0.615901
ENSDARG00000104193	CABZ01019904.1	zmp_ph198_E2r	het_t3_wt_baz1	-0.00176608
ENSDARG00000104193	CABZ01019904.1	zmp_ph198_E4r	het_t3_wt_baz1	0.387441
ENSDARG00000104193	CABZ01019904.1	zmp_ph198_A9r	wt_t3_het_baz1	1.75716
ENSDARG00000104193	CABZ01019904.1	zmp_ph198_B4r	wt_t3_het_baz1	0.111504
ENSDARG00000104193	CABZ01019904.1	zmp_ph198_B5r	wt_t3_het_baz1	-0.615901
ENSDARG00000104193	CABZ01019904.1	zmp_ph198_C6r	wt_t3_het_baz1	-0.615901
ENSDARG00000104193	CABZ01019904.1	zmp_ph198_D4r	wt_t3_het_baz1	-0.615901
ENSDARG00000104193	CABZ01019904.1	zmp_ph198_D6r	wt_t3_het_baz1	-0.615901
ENSDARG00000104193	CABZ01019904.1	zmp_ph198_D8r	wt_t3_het_baz1	1.7619
ENSDARG00000104193	CABZ01019904.1	zmp_ph198_E3r	wt_t3_het_baz1	-0.615901
ENSDARG00000104193	CABZ01019904.1	zmp_ph198_E6r	wt_t3_het_baz1	0.0245572
ENSDARG00000104193	CABZ01019904.1	zmp_ph198_E11r	wt_t3_het_baz1	0.89563
ENSDARG00000104193	CABZ01019904.1	zmp_ph198_E12r	wt_t3_het_baz1	0.0702493
ENSDARG00000104193	CABZ01019904.1	zmp_ph198_F1r	wt_t3_het_baz1	-0.615901
ENSDARG00000104193	CABZ01019904.1	zmp_ph198_A6r	het_t3_het_baz1	-0.615901
ENSDARG00000104193	CABZ01019904.1	zmp_ph198_A8r	het_t3_het_baz1	-0.615901
ENSDARG00000104193	CABZ01019904.1	zmp_ph198_A10r	het_t3_het_baz1	-0.615901
ENSDARG00000104193	CABZ01019904.1	zmp_ph198_B3r	het_t3_het_baz1	-0.615901
ENSDARG00000104193	CABZ01019904.1	zmp_ph198_B7r	het_t3_het_baz1	-0.122673
ENSDARG00000104193	CABZ01019904.1	zmp_ph198_C3r	het_t3_het_baz1	-0.615901
ENSDARG00000104193	CABZ01019904.1	zmp_ph198_C9r	het_t3_het_baz1	-0.615901
ENSDARG00000104193	CABZ01019904.1	zmp_ph198_C10r	het_t3_het_baz1	-0.615901
ENSDARG00000104193	CABZ01019904.1	zmp_ph198_D5r	het_t3_het_baz1	-0.615901
ENSDARG00000104193	CABZ01019904.1	zmp_ph198_D9r	het_t3_het_baz1	-0.615901
ENSDARG00000104193	CABZ01019904.1	zmp_ph198_D10r	het_t3_het_baz1	-0.615901
ENSDARG00000104193	CABZ01019904.1	zmp_ph198_D12r	het_t3_het_baz1	-0.615901
ENSDARG00000060207	traf7	zmp_ph198_A4r	wt_t3_wt_baz1	1.96888
ENSDARG00000060207	traf7	zmp_ph198_A5r	wt_t3_wt_baz1	-0.556785
ENSDARG00000060207	traf7	zmp_ph198_A7r	wt_t3_wt_baz1	1.80341
ENSDARG00000060207	traf7	zmp_ph198_A11r	wt_t3_wt_baz1	-0.104495
ENSDARG00000060207	traf7	zmp_ph198_B6r	wt_t3_wt_baz1	-0.116107
ENSDARG00000060207	traf7	zmp_ph198_C1r	wt_t3_wt_baz1	1.5471
ENSDARG00000060207	traf7	zmp_ph198_C2r	wt_t3_wt_baz1	-1.07581
ENSDARG00000060207	traf7	zmp_ph198_C4r	wt_t3_wt_baz1	1.95746
ENSDARG00000060207	traf7	zmp_ph198_C11r	wt_t3_wt_baz1	0.787148
ENSDARG00000060207	traf7	zmp_ph198_D1r	wt_t3_wt_baz1	-0.540244
ENSDARG00000060207	traf7	zmp_ph198_D2r	wt_t3_wt_baz1	1.22872
ENSDARG00000060207	traf7	zmp_ph198_D3r	wt_t3_wt_baz1	2.83453
ENSDARG00000060207	traf7	zmp_ph198_A3r	het_t3_wt_baz1	-1.1821
ENSDARG00000060207	traf7	zmp_ph198_B2r	het_t3_wt_baz1	0.0659642
ENSDARG00000060207	traf7	zmp_ph198_B8r	het_t3_wt_baz1	-1.43351
ENSDARG00000060207	traf7	zmp_ph198_B9r	het_t3_wt_baz1	-0.14493
ENSDARG00000060207	traf7	zmp_ph198_B10r	het_t3_wt_baz1	-0.741744
ENSDARG00000060207	traf7	zmp_ph198_B11r	het_t3_wt_baz1	-0.778938
ENSDARG00000060207	traf7	zmp_ph198_C5r	het_t3_wt_baz1	-0.0172207
ENSDARG00000060207	traf7	zmp_ph198_C8r	het_t3_wt_baz1	-1.20306
ENSDARG00000060207	traf7	zmp_ph198_D7r	het_t3_wt_baz1	-0.200899
ENSDARG00000060207	traf7	zmp_ph198_D11r	het_t3_wt_baz1	-0.533877
ENSDARG00000060207	traf7	zmp_ph198_E2r	het_t3_wt_baz1	-0.332692
ENSDARG00000060207	traf7	zmp_ph198_E4r	het_t3_wt_baz1	-0.534281
ENSDARG00000060207	traf7	zmp_ph198_A9r	wt_t3_het_baz1	0.427457
ENSDARG00000060207	traf7	zmp_ph198_B4r	wt_t3_het_baz1	0.359285
ENSDARG00000060207	traf7	zmp_ph198_B5r	wt_t3_het_baz1	0.0833547
ENSDARG00000060207	traf7	zmp_ph198_C6r	wt_t3_het_baz1	0.921919
ENSDARG00000060207	traf7	zmp_ph198_D4r	wt_t3_het_baz1	-0.41333
ENSDARG00000060207	traf7	zmp_ph198_D6r	wt_t3_het_baz1	0.424173
ENSDARG00000060207	traf7	zmp_ph198_D8r	wt_t3_het_baz1	-0.367977
ENSDARG00000060207	traf7	zmp_ph198_E3r	wt_t3_het_baz1	-0.35414
ENSDARG00000060207	traf7	zmp_ph198_E6r	wt_t3_het_baz1	-0.285509
ENSDARG00000060207	traf7	zmp_ph198_E11r	wt_t3_het_baz1	1.95321
ENSDARG00000060207	traf7	zmp_ph198_E12r	wt_t3_het_baz1	0.718822
ENSDARG00000060207	traf7	zmp_ph198_F1r	wt_t3_het_baz1	0.857301
ENSDARG00000060207	traf7	zmp_ph198_A6r	het_t3_het_baz1	-0.982946
ENSDARG00000060207	traf7	zmp_ph198_A8r	het_t3_het_baz1	-0.362627
ENSDARG00000060207	traf7	zmp_ph198_A10r	het_t3_het_baz1	-0.0296308
ENSDARG00000060207	traf7	zmp_ph198_B3r	het_t3_het_baz1	-0.936149
ENSDARG00000060207	traf7	zmp_ph198_B7r	het_t3_het_baz1	-0.770439
ENSDARG00000060207	traf7	zmp_ph198_C3r	het_t3_het_baz1	-0.537961
ENSDARG00000060207	traf7	zmp_ph198_C9r	het_t3_het_baz1	0.0847607
ENSDARG00000060207	traf7	zmp_ph198_C10r	het_t3_het_baz1	-0.885136
ENSDARG00000060207	traf7	zmp_ph198_D5r	het_t3_het_baz1	-0.967318
ENSDARG00000060207	traf7	zmp_ph198_D9r	het_t3_het_baz1	0.74326
ENSDARG00000060207	traf7	zmp_ph198_D10r	het_t3_het_baz1	-1.13943
ENSDARG00000060207	traf7	zmp_ph198_D12r	het_t3_het_baz1	-1.23745
ENSDARG00000102590	polr3h	zmp_ph198_A4r	wt_t3_wt_baz1	-0.798363
ENSDARG00000102590	polr3h	zmp_ph198_A5r	wt_t3_wt_baz1	-1.33995
ENSDARG00000102590	polr3h	zmp_ph198_A7r	wt_t3_wt_baz1	-0.724808
ENSDARG00000102590	polr3h	zmp_ph198_A11r	wt_t3_wt_baz1	-0.576897
ENSDARG00000102590	polr3h	zmp_ph198_B6r	wt_t3_wt_baz1	-0.390481
ENSDARG00000102590	polr3h	zmp_ph198_C1r	wt_t3_wt_baz1	-0.871283
ENSDARG00000102590	polr3h	zmp_ph198_C2r	wt_t3_wt_baz1	-1.47745
ENSDARG00000102590	polr3h	zmp_ph198_C4r	wt_t3_wt_baz1	-0.802692
ENSDARG00000102590	polr3h	zmp_ph198_C11r	wt_t3_wt_baz1	-1.246
ENSDARG00000102590	polr3h	zmp_ph198_D1r	wt_t3_wt_baz1	-0.649119
ENSDARG00000102590	polr3h	zmp_ph198_D2r	wt_t3_wt_baz1	-1.33085
ENSDARG00000102590	polr3h	zmp_ph198_D3r	wt_t3_wt_baz1	-0.369415
ENSDARG00000102590	polr3h	zmp_ph198_A3r	het_t3_wt_baz1	-0.27771
ENSDARG00000102590	polr3h	zmp_ph198_B2r	het_t3_wt_baz1	-0.572521
ENSDARG00000102590	polr3h	zmp_ph198_B8r	het_t3_wt_baz1	1.07733
ENSDARG00000102590	polr3h	zmp_ph198_B9r	het_t3_wt_baz1	0.353376
ENSDARG00000102590	polr3h	zmp_ph198_B10r	het_t3_wt_baz1	0.140158
ENSDARG00000102590	polr3h	zmp_ph198_B11r	het_t3_wt_baz1	0.0617259
ENSDARG00000102590	polr3h	zmp_ph198_C5r	het_t3_wt_baz1	1.22116
ENSDARG00000102590	polr3h	zmp_ph198_C8r	het_t3_wt_baz1	1.75373
ENSDARG00000102590	polr3h	zmp_ph198_D7r	het_t3_wt_baz1	1.55472
ENSDARG00000102590	polr3h	zmp_ph198_D11r	het_t3_wt_baz1	0.411866
ENSDARG00000102590	polr3h	zmp_ph198_E2r	het_t3_wt_baz1	1.04023
ENSDARG00000102590	polr3h	zmp_ph198_E4r	het_t3_wt_baz1	0.637831
ENSDARG00000102590	polr3h	zmp_ph198_A9r	wt_t3_het_baz1	-0.979433
ENSDARG00000102590	polr3h	zmp_ph198_B4r	wt_t3_het_baz1	0.073613
ENSDARG00000102590	polr3h	zmp_ph198_B5r	wt_t3_het_baz1	-0.938011
ENSDARG00000102590	polr3h	zmp_ph198_C6r	wt_t3_het_baz1	-0.860363
ENSDARG00000102590	polr3h	zmp_ph198_D4r	wt_t3_het_baz1	-0.34819
ENSDARG00000102590	polr3h	zmp_ph198_D6r	wt_t3_het_baz1	-0.79709
ENSDARG00000102590	polr3h	zmp_ph198_D8r	wt_t3_het_baz1	-0.876315
ENSDARG00000102590	polr3h	zmp_ph198_E3r	wt_t3_het_baz1	-0.5335
ENSDARG00000102590	polr3h	zmp_ph198_E6r	wt_t3_het_baz1	-0.239023
ENSDARG00000102590	polr3h	zmp_ph198_E11r	wt_t3_het_baz1	-0.676011
ENSDARG00000102590	polr3h	zmp_ph198_E12r	wt_t3_het_baz1	-1.38835
ENSDARG00000102590	polr3h	zmp_ph198_F1r	wt_t3_het_baz1	-0.971497
ENSDARG00000102590	polr3h	zmp_ph198_A6r	het_t3_het_baz1	0.38758
ENSDARG00000102590	polr3h	zmp_ph198_A8r	het_t3_het_baz1	2.64538
ENSDARG00000102590	polr3h	zmp_ph198_A10r	het_t3_het_baz1	0.0399647
ENSDARG00000102590	polr3h	zmp_ph198_B3r	het_t3_het_baz1	1.77502
ENSDARG00000102590	polr3h	zmp_ph198_B7r	het_t3_het_baz1	0.340801
ENSDARG00000102590	polr3h	zmp_ph198_C3r	het_t3_het_baz1	0.96591
ENSDARG00000102590	polr3h	zmp_ph198_C9r	het_t3_het_baz1	0.468897
ENSDARG00000102590	polr3h	zmp_ph198_C10r	het_t3_het_baz1	1.34025
ENSDARG00000102590	polr3h	zmp_ph198_D5r	het_t3_het_baz1	1.53298
ENSDARG00000102590	polr3h	zmp_ph198_D9r	het_t3_het_baz1	0.111634
ENSDARG00000102590	polr3h	zmp_ph198_D10r	het_t3_het_baz1	1.14332
ENSDARG00000102590	polr3h	zmp_ph198_D12r	het_t3_het_baz1	0.957864
ENSDARG00000036625	polr2f	zmp_ph198_A4r	wt_t3_wt_baz1	-0.887775
ENSDARG00000036625	polr2f	zmp_ph198_A5r	wt_t3_wt_baz1	-0.178893
ENSDARG00000036625	polr2f	zmp_ph198_A7r	wt_t3_wt_baz1	-1.12247
ENSDARG00000036625	polr2f	zmp_ph198_A11r	wt_t3_wt_baz1	-0.641928
ENSDARG00000036625	polr2f	zmp_ph198_B6r	wt_t3_wt_baz1	-0.704582
ENSDARG00000036625	polr2f	zmp_ph198_C1r	wt_t3_wt_baz1	-0.231356
ENSDARG00000036625	polr2f	zmp_ph198_C2r	wt_t3_wt_baz1	-0.355374
ENSDARG00000036625	polr2f	zmp_ph198_C4r	wt_t3_wt_baz1	-0.256893
ENSDARG00000036625	polr2f	zmp_ph198_C11r	wt_t3_wt_baz1	-0.47862
ENSDARG00000036625	polr2f	zmp_ph198_D1r	wt_t3_wt_baz1	-0.688057
ENSDARG00000036625	polr2f	zmp_ph198_D2r	wt_t3_wt_baz1	-0.0877635
ENSDARG00000036625	polr2f	zmp_ph198_D3r	wt_t3_wt_baz1	-0.382575
ENSDARG00000036625	polr2f	zmp_ph198_A3r	het_t3_wt_baz1	0.881451
ENSDARG00000036625	polr2f	zmp_ph198_B2r	het_t3_wt_baz1	-0.322034
ENSDARG00000036625	polr2f	zmp_ph198_B8r	het_t3_wt_baz1	2.03112
ENSDARG00000036625	polr2f	zmp_ph198_B9r	het_t3_wt_baz1	1.34354
ENSDARG00000036625	polr2f	zmp_ph198_B10r	het_t3_wt_baz1	-0.743941
ENSDARG00000036625	polr2f	zmp_ph198_B11r	het_t3_wt_baz1	-0.324731
ENSDARG00000036625	polr2f	zmp_ph198_C5r	het_t3_wt_baz1	1.65644
ENSDARG00000036625	polr2f	zmp_ph198_C8r	het_t3_wt_baz1	0.84318
ENSDARG00000036625	polr2f	zmp_ph198_D7r	het_t3_wt_baz1	1.0395
ENSDARG00000036625	polr2f	zmp_ph198_D11r	het_t3_wt_baz1	-0.388692
ENSDARG00000036625	polr2f	zmp_ph198_E2r	het_t3_wt_baz1	-0.424728
ENSDARG00000036625	polr2f	zmp_ph198_E4r	het_t3_wt_baz1	0.30787
ENSDARG00000036625	polr2f	zmp_ph198_A9r	wt_t3_het_baz1	-0.135035
ENSDARG00000036625	polr2f	zmp_ph198_B4r	wt_t3_het_baz1	-1.34186
ENSDARG00000036625	polr2f	zmp_ph198_B5r	wt_t3_het_baz1	-2.12257
ENSDARG00000036625	polr2f	zmp_ph198_C6r	wt_t3_het_baz1	-0.796847
ENSDARG00000036625	polr2f	zmp_ph198_D4r	wt_t3_het_baz1	-1.21804
ENSDARG00000036625	polr2f	zmp_ph198_D6r	wt_t3_het_baz1	0.752804
ENSDARG00000036625	polr2f	zmp_ph198_D8r	wt_t3_het_baz1	-0.805363
ENSDARG00000036625	polr2f	zmp_ph198_E3r	wt_t3_het_baz1	-0.956326
ENSDARG00000036625	polr2f	zmp_ph198_E6r	wt_t3_het_baz1	-1.0671
ENSDARG00000036625	polr2f	zmp_ph198_E11r	wt_t3_het_baz1	-0.509554
ENSDARG00000036625	polr2f	zmp_ph198_E12r	wt_t3_het_baz1	-1.28296
ENSDARG00000036625	polr2f	zmp_ph198_F1r	wt_t3_het_baz1	-0.166664
ENSDARG00000036625	polr2f	zmp_ph198_A6r	het_t3_het_baz1	-0.747207
ENSDARG00000036625	polr2f	zmp_ph198_A8r	het_t3_het_baz1	-0.145493
ENSDARG00000036625	polr2f	zmp_ph198_A10r	het_t3_het_baz1	0.48149
ENSDARG00000036625	polr2f	zmp_ph198_B3r	het_t3_het_baz1	1.28764
ENSDARG00000036625	polr2f	zmp_ph198_B7r	het_t3_het_baz1	-0.233233
ENSDARG00000036625	polr2f	zmp_ph198_C3r	het_t3_het_baz1	0.970231
ENSDARG00000036625	polr2f	zmp_ph198_C9r	het_t3_het_baz1	1.17351
ENSDARG00000036625	polr2f	zmp_ph198_C10r	het_t3_het_baz1	1.45499
ENSDARG00000036625	polr2f	zmp_ph198_D5r	het_t3_het_baz1	0.439199
ENSDARG00000036625	polr2f	zmp_ph198_D9r	het_t3_het_baz1	1.83591
ENSDARG00000036625	polr2f	zmp_ph198_D10r	het_t3_het_baz1	0.907439
ENSDARG00000036625	polr2f	zmp_ph198_D12r	het_t3_het_baz1	2.34234
ENSDARG00000112755	CR394546.5	zmp_ph198_A4r	wt_t3_wt_baz1	-0.577544
ENSDARG00000112755	CR394546.5	zmp_ph198_A5r	wt_t3_wt_baz1	1.68143
ENSDARG00000112755	CR394546.5	zmp_ph198_A7r	wt_t3_wt_baz1	-0.981271
ENSDARG00000112755	CR394546.5	zmp_ph198_A11r	wt_t3_wt_baz1	-0.191302
ENSDARG00000112755	CR394546.5	zmp_ph198_B6r	wt_t3_wt_baz1	0.070313
ENSDARG00000112755	CR394546.5	zmp_ph198_C1r	wt_t3_wt_baz1	-0.823323
ENSDARG00000112755	CR394546.5	zmp_ph198_C2r	wt_t3_wt_baz1	-1.52356
ENSDARG00000112755	CR394546.5	zmp_ph198_C4r	wt_t3_wt_baz1	-0.656883
ENSDARG00000112755	CR394546.5	zmp_ph198_C11r	wt_t3_wt_baz1	0.0311337
ENSDARG00000112755	CR394546.5	zmp_ph198_D1r	wt_t3_wt_baz1	-1.39564
ENSDARG00000112755	CR394546.5	zmp_ph198_D2r	wt_t3_wt_baz1	-1.55698
ENSDARG00000112755	CR394546.5	zmp_ph198_D3r	wt_t3_wt_baz1	-0.325399
ENSDARG00000112755	CR394546.5	zmp_ph198_A3r	het_t3_wt_baz1	1.12121
ENSDARG00000112755	CR394546.5	zmp_ph198_B2r	het_t3_wt_baz1	-0.322701
ENSDARG00000112755	CR394546.5	zmp_ph198_B8r	het_t3_wt_baz1	1.31143
ENSDARG00000112755	CR394546.5	zmp_ph198_B9r	het_t3_wt_baz1	0.26038
ENSDARG00000112755	CR394546.5	zmp_ph198_B10r	het_t3_wt_baz1	1.37242
ENSDARG00000112755	CR394546.5	zmp_ph198_B11r	het_t3_wt_baz1	0.484647
ENSDARG00000112755	CR394546.5	zmp_ph198_C5r	het_t3_wt_baz1	0.28365
ENSDARG00000112755	CR394546.5	zmp_ph198_C8r	het_t3_wt_baz1	0.98436
ENSDARG00000112755	CR394546.5	zmp_ph198_D7r	het_t3_wt_baz1	-1.54969
ENSDARG00000112755	CR394546.5	zmp_ph198_D11r	het_t3_wt_baz1	0.305659
ENSDARG00000112755	CR394546.5	zmp_ph198_E2r	het_t3_wt_baz1	1.88292
ENSDARG00000112755	CR394546.5	zmp_ph198_E4r	het_t3_wt_baz1	0.339787
ENSDARG00000112755	CR394546.5	zmp_ph198_A9r	wt_t3_het_baz1	-0.612712
ENSDARG00000112755	CR394546.5	zmp_ph198_B4r	wt_t3_het_baz1	-1.10932
ENSDARG00000112755	CR394546.5	zmp_ph198_B5r	wt_t3_het_baz1	-0.00448564
ENSDARG00000112755	CR394546.5	zmp_ph198_C6r	wt_t3_het_baz1	-0.811466
ENSDARG00000112755	CR394546.5	zmp_ph198_D4r	wt_t3_het_baz1	-1.46921
ENSDARG00000112755	CR394546.5	zmp_ph198_D6r	wt_t3_het_baz1	-0.124214
ENSDARG00000112755	CR394546.5	zmp_ph198_D8r	wt_t3_het_baz1	-0.891396
ENSDARG00000112755	CR394546.5	zmp_ph198_E3r	wt_t3_het_baz1	-0.786344
ENSDARG00000112755	CR394546.5	zmp_ph198_E6r	wt_t3_het_baz1	-1.18235
ENSDARG00000112755	CR394546.5	zmp_ph198_E11r	wt_t3_het_baz1	-0.86999
ENSDARG00000112755	CR394546.5	zmp_ph198_E12r	wt_t3_het_baz1	-0.824702
ENSDARG00000112755	CR394546.5	zmp_ph198_F1r	wt_t3_het_baz1	-1.31673
ENSDARG00000112755	CR394546.5	zmp_ph198_A6r	het_t3_het_baz1	0.292085
ENSDARG00000112755	CR394546.5	zmp_ph198_A8r	het_t3_het_baz1	1.44308
ENSDARG00000112755	CR394546.5	zmp_ph198_A10r	het_t3_het_baz1	1.09416
ENSDARG00000112755	CR394546.5	zmp_ph198_B3r	het_t3_het_baz1	0.939596
ENSDARG00000112755	CR394546.5	zmp_ph198_B7r	het_t3_het_baz1	1.41489
ENSDARG00000112755	CR394546.5	zmp_ph198_C3r	het_t3_het_baz1	0.0138939
ENSDARG00000112755	CR394546.5	zmp_ph198_C9r	het_t3_het_baz1	-0.180927
ENSDARG00000112755	CR394546.5	zmp_ph198_C10r	het_t3_het_baz1	0.369722
ENSDARG00000112755	CR394546.5	zmp_ph198_D5r	het_t3_het_baz1	0.705284
ENSDARG00000112755	CR394546.5	zmp_ph198_D9r	het_t3_het_baz1	1.82145
ENSDARG00000112755	CR394546.5	zmp_ph198_D10r	het_t3_het_baz1	0.759411
ENSDARG00000112755	CR394546.5	zmp_ph198_D12r	het_t3_het_baz1	1.10523
ENSDARG00000039752	si:ch73-308m11.1	zmp_ph198_A4r	wt_t3_wt_baz1	0.361845
ENSDARG00000039752	si:ch73-308m11.1	zmp_ph198_A5r	wt_t3_wt_baz1	0.280763
ENSDARG00000039752	si:ch73-308m11.1	zmp_ph198_A7r	wt_t3_wt_baz1	1.76131
ENSDARG00000039752	si:ch73-308m11.1	zmp_ph198_A11r	wt_t3_wt_baz1	0.931273
ENSDARG00000039752	si:ch73-308m11.1	zmp_ph198_B6r	wt_t3_wt_baz1	1.57373
ENSDARG00000039752	si:ch73-308m11.1	zmp_ph198_C1r	wt_t3_wt_baz1	0.114536
ENSDARG00000039752	si:ch73-308m11.1	zmp_ph198_C2r	wt_t3_wt_baz1	-0.360195
ENSDARG00000039752	si:ch73-308m11.1	zmp_ph198_C4r	wt_t3_wt_baz1	1.06762
ENSDARG00000039752	si:ch73-308m11.1	zmp_ph198_C11r	wt_t3_wt_baz1	0.939893
ENSDARG00000039752	si:ch73-308m11.1	zmp_ph198_D1r	wt_t3_wt_baz1	1.69955
ENSDARG00000039752	si:ch73-308m11.1	zmp_ph198_D2r	wt_t3_wt_baz1	-0.421517
ENSDARG00000039752	si:ch73-308m11.1	zmp_ph198_D3r	wt_t3_wt_baz1	2.50834
ENSDARG00000039752	si:ch73-308m11.1	zmp_ph198_A3r	het_t3_wt_baz1	1.26081
ENSDARG00000039752	si:ch73-308m11.1	zmp_ph198_B2r	het_t3_wt_baz1	1.49357
ENSDARG00000039752	si:ch73-308m11.1	zmp_ph198_B8r	het_t3_wt_baz1	0.0819929
ENSDARG00000039752	si:ch73-308m11.1	zmp_ph198_B9r	het_t3_wt_baz1	0.58162
ENSDARG00000039752	si:ch73-308m11.1	zmp_ph198_B10r	het_t3_wt_baz1	0.805659
ENSDARG00000039752	si:ch73-308m11.1	zmp_ph198_B11r	het_t3_wt_baz1	0.491005
ENSDARG00000039752	si:ch73-308m11.1	zmp_ph198_C5r	het_t3_wt_baz1	0.130315
ENSDARG00000039752	si:ch73-308m11.1	zmp_ph198_C8r	het_t3_wt_baz1	0.715498
ENSDARG00000039752	si:ch73-308m11.1	zmp_ph198_D7r	het_t3_wt_baz1	0.559607
ENSDARG00000039752	si:ch73-308m11.1	zmp_ph198_D11r	het_t3_wt_baz1	-0.546435
ENSDARG00000039752	si:ch73-308m11.1	zmp_ph198_E2r	het_t3_wt_baz1	1.26177
ENSDARG00000039752	si:ch73-308m11.1	zmp_ph198_E4r	het_t3_wt_baz1	0.179054
ENSDARG00000039752	si:ch73-308m11.1	zmp_ph198_A9r	wt_t3_het_baz1	0.185965
ENSDARG00000039752	si:ch73-308m11.1	zmp_ph198_B4r	wt_t3_het_baz1	-0.504812
ENSDARG00000039752	si:ch73-308m11.1	zmp_ph198_B5r	wt_t3_het_baz1	-0.911063
ENSDARG00000039752	si:ch73-308m11.1	zmp_ph198_C6r	wt_t3_het_baz1	0.0947307
ENSDARG00000039752	si:ch73-308m11.1	zmp_ph198_D4r	wt_t3_het_baz1	0.0784557
ENSDARG00000039752	si:ch73-308m11.1	zmp_ph198_D6r	wt_t3_het_baz1	-0.721275
ENSDARG00000039752	si:ch73-308m11.1	zmp_ph198_D8r	wt_t3_het_baz1	-1.91514
ENSDARG00000039752	si:ch73-308m11.1	zmp_ph198_E3r	wt_t3_het_baz1	-0.586538
ENSDARG00000039752	si:ch73-308m11.1	zmp_ph198_E6r	wt_t3_het_baz1	0.396345
ENSDARG00000039752	si:ch73-308m11.1	zmp_ph198_E11r	wt_t3_het_baz1	-1.24931
ENSDARG00000039752	si:ch73-308m11.1	zmp_ph198_E12r	wt_t3_het_baz1	-0.419553
ENSDARG00000039752	si:ch73-308m11.1	zmp_ph198_F1r	wt_t3_het_baz1	-1.20659
ENSDARG00000039752	si:ch73-308m11.1	zmp_ph198_A6r	het_t3_het_baz1	-0.217622
ENSDARG00000039752	si:ch73-308m11.1	zmp_ph198_A8r	het_t3_het_baz1	-0.819785
ENSDARG00000039752	si:ch73-308m11.1	zmp_ph198_A10r	het_t3_het_baz1	-1.65301
ENSDARG00000039752	si:ch73-308m11.1	zmp_ph198_B3r	het_t3_het_baz1	-0.872909
ENSDARG00000039752	si:ch73-308m11.1	zmp_ph198_B7r	het_t3_het_baz1	-1.10565
ENSDARG00000039752	si:ch73-308m11.1	zmp_ph198_C3r	het_t3_het_baz1	-1.54499
ENSDARG00000039752	si:ch73-308m11.1	zmp_ph198_C9r	het_t3_het_baz1	-0.178109
ENSDARG00000039752	si:ch73-308m11.1	zmp_ph198_C10r	het_t3_het_baz1	-0.990013
ENSDARG00000039752	si:ch73-308m11.1	zmp_ph198_D5r	het_t3_het_baz1	-0.31826
ENSDARG00000039752	si:ch73-308m11.1	zmp_ph198_D9r	het_t3_het_baz1	-1.07062
ENSDARG00000039752	si:ch73-308m11.1	zmp_ph198_D10r	het_t3_het_baz1	-0.883463
ENSDARG00000039752	si:ch73-308m11.1	zmp_ph198_D12r	het_t3_het_baz1	-1.0584
ENSDARG00000088820	FP326649.1	zmp_ph198_A4r	wt_t3_wt_baz1	0.226114
ENSDARG00000088820	FP326649.1	zmp_ph198_A5r	wt_t3_wt_baz1	1.09822
ENSDARG00000088820	FP326649.1	zmp_ph198_A7r	wt_t3_wt_baz1	-0.0663858
ENSDARG00000088820	FP326649.1	zmp_ph198_A11r	wt_t3_wt_baz1	3.75957
ENSDARG00000088820	FP326649.1	zmp_ph198_B6r	wt_t3_wt_baz1	-1.27766
ENSDARG00000088820	FP326649.1	zmp_ph198_C1r	wt_t3_wt_baz1	0.544582
ENSDARG00000088820	FP326649.1	zmp_ph198_C2r	wt_t3_wt_baz1	1.5188
ENSDARG00000088820	FP326649.1	zmp_ph198_C4r	wt_t3_wt_baz1	-1.28158
ENSDARG00000088820	FP326649.1	zmp_ph198_C11r	wt_t3_wt_baz1	1.35453
ENSDARG00000088820	FP326649.1	zmp_ph198_D1r	wt_t3_wt_baz1	0.487031
ENSDARG00000088820	FP326649.1	zmp_ph198_D2r	wt_t3_wt_baz1	0.308129
ENSDARG00000088820	FP326649.1	zmp_ph198_D3r	wt_t3_wt_baz1	0.312061
ENSDARG00000088820	FP326649.1	zmp_ph198_A3r	het_t3_wt_baz1	0.384873
ENSDARG00000088820	FP326649.1	zmp_ph198_B2r	het_t3_wt_baz1	0.743804
ENSDARG00000088820	FP326649.1	zmp_ph198_B8r	het_t3_wt_baz1	0.00137012
ENSDARG00000088820	FP326649.1	zmp_ph198_B9r	het_t3_wt_baz1	1.44119
ENSDARG00000088820	FP326649.1	zmp_ph198_B10r	het_t3_wt_baz1	-0.384637
ENSDARG00000088820	FP326649.1	zmp_ph198_B11r	het_t3_wt_baz1	1.08572
ENSDARG00000088820	FP326649.1	zmp_ph198_C5r	het_t3_wt_baz1	-0.266576
ENSDARG00000088820	FP326649.1	zmp_ph198_C8r	het_t3_wt_baz1	-0.642139
ENSDARG00000088820	FP326649.1	zmp_ph198_D7r	het_t3_wt_baz1	1.62649
ENSDARG00000088820	FP326649.1	zmp_ph198_D11r	het_t3_wt_baz1	1.2262
ENSDARG00000088820	FP326649.1	zmp_ph198_E2r	het_t3_wt_baz1	-0.0339351
ENSDARG00000088820	FP326649.1	zmp_ph198_E4r	het_t3_wt_baz1	0.501426
ENSDARG00000088820	FP326649.1	zmp_ph198_A9r	wt_t3_het_baz1	-1.47158
ENSDARG00000088820	FP326649.1	zmp_ph198_B4r	wt_t3_het_baz1	-0.0954868
ENSDARG00000088820	FP326649.1	zmp_ph198_B5r	wt_t3_het_baz1	-0.166984
ENSDARG00000088820	FP326649.1	zmp_ph198_C6r	wt_t3_het_baz1	-0.575707
ENSDARG00000088820	FP326649.1	zmp_ph198_D4r	wt_t3_het_baz1	0.0357054
ENSDARG00000088820	FP326649.1	zmp_ph198_D6r	wt_t3_het_baz1	0.400442
ENSDARG00000088820	FP326649.1	zmp_ph198_D8r	wt_t3_het_baz1	-0.877681
ENSDARG00000088820	FP326649.1	zmp_ph198_E3r	wt_t3_het_baz1	-0.386437
ENSDARG00000088820	FP326649.1	zmp_ph198_E6r	wt_t3_het_baz1	0.0361484
ENSDARG00000088820	FP326649.1	zmp_ph198_E11r	wt_t3_het_baz1	-1.16598
ENSDARG00000088820	FP326649.1	zmp_ph198_E12r	wt_t3_het_baz1	0.386152
ENSDARG00000088820	FP326649.1	zmp_ph198_F1r	wt_t3_het_baz1	0.0322908
ENSDARG00000088820	FP326649.1	zmp_ph198_A6r	het_t3_het_baz1	-1.16709
ENSDARG00000088820	FP326649.1	zmp_ph198_A8r	het_t3_het_baz1	-1.40392
ENSDARG00000088820	FP326649.1	zmp_ph198_A10r	het_t3_het_baz1	-0.887057
ENSDARG00000088820	FP326649.1	zmp_ph198_B3r	het_t3_het_baz1	-0.745581
ENSDARG00000088820	FP326649.1	zmp_ph198_B7r	het_t3_het_baz1	-0.355839
ENSDARG00000088820	FP326649.1	zmp_ph198_C3r	het_t3_het_baz1	-0.338827
ENSDARG00000088820	FP326649.1	zmp_ph198_C9r	het_t3_het_baz1	-0.165592
ENSDARG00000088820	FP326649.1	zmp_ph198_C10r	het_t3_het_baz1	-1.05813
ENSDARG00000088820	FP326649.1	zmp_ph198_D5r	het_t3_het_baz1	-0.630339
ENSDARG00000088820	FP326649.1	zmp_ph198_D9r	het_t3_het_baz1	-1.13015
ENSDARG00000088820	FP326649.1	zmp_ph198_D10r	het_t3_het_baz1	0.296608
ENSDARG00000088820	FP326649.1	zmp_ph198_D12r	het_t3_het_baz1	-1.23218
ENSDARG00000113960	AL953907.2	zmp_ph198_A4r	wt_t3_wt_baz1	-0.919482
ENSDARG00000113960	AL953907.2	zmp_ph198_A5r	wt_t3_wt_baz1	-0.871966
ENSDARG00000113960	AL953907.2	zmp_ph198_A7r	wt_t3_wt_baz1	-0.90361
ENSDARG00000113960	AL953907.2	zmp_ph198_A11r	wt_t3_wt_baz1	-0.955507
ENSDARG00000113960	AL953907.2	zmp_ph198_B6r	wt_t3_wt_baz1	-0.914507
ENSDARG00000113960	AL953907.2	zmp_ph198_C1r	wt_t3_wt_baz1	-0.944073
ENSDARG00000113960	AL953907.2	zmp_ph198_C2r	wt_t3_wt_baz1	-0.945452
ENSDARG00000113960	AL953907.2	zmp_ph198_C4r	wt_t3_wt_baz1	-0.936298
ENSDARG00000113960	AL953907.2	zmp_ph198_C11r	wt_t3_wt_baz1	-0.910005
ENSDARG00000113960	AL953907.2	zmp_ph198_D1r	wt_t3_wt_baz1	-0.955318
ENSDARG00000113960	AL953907.2	zmp_ph198_D2r	wt_t3_wt_baz1	-0.96061
ENSDARG00000113960	AL953907.2	zmp_ph198_D3r	wt_t3_wt_baz1	-0.919891
ENSDARG00000113960	AL953907.2	zmp_ph198_A3r	het_t3_wt_baz1	-0.882495
ENSDARG00000113960	AL953907.2	zmp_ph198_B2r	het_t3_wt_baz1	-0.871489
ENSDARG00000113960	AL953907.2	zmp_ph198_B8r	het_t3_wt_baz1	-0.885552
ENSDARG00000113960	AL953907.2	zmp_ph198_B9r	het_t3_wt_baz1	-0.922626
ENSDARG00000113960	AL953907.2	zmp_ph198_B10r	het_t3_wt_baz1	-0.870423
ENSDARG00000113960	AL953907.2	zmp_ph198_B11r	het_t3_wt_baz1	-0.910359
ENSDARG00000113960	AL953907.2	zmp_ph198_C5r	het_t3_wt_baz1	-0.937585
ENSDARG00000113960	AL953907.2	zmp_ph198_C8r	het_t3_wt_baz1	-0.88784
ENSDARG00000113960	AL953907.2	zmp_ph198_D7r	het_t3_wt_baz1	-0.961466
ENSDARG00000113960	AL953907.2	zmp_ph198_D11r	het_t3_wt_baz1	-0.87439
ENSDARG00000113960	AL953907.2	zmp_ph198_E2r	het_t3_wt_baz1	-0.851086
ENSDARG00000113960	AL953907.2	zmp_ph198_E4r	het_t3_wt_baz1	-0.916102
ENSDARG00000113960	AL953907.2	zmp_ph198_A9r	wt_t3_het_baz1	0.822907
ENSDARG00000113960	AL953907.2	zmp_ph198_B4r	wt_t3_het_baz1	0.431656
ENSDARG00000113960	AL953907.2	zmp_ph198_B5r	wt_t3_het_baz1	3.05092
ENSDARG00000113960	AL953907.2	zmp_ph198_C6r	wt_t3_het_baz1	0.849434
ENSDARG00000113960	AL953907.2	zmp_ph198_D4r	wt_t3_het_baz1	0.129268
ENSDARG00000113960	AL953907.2	zmp_ph198_D6r	wt_t3_het_baz1	1.26291
ENSDARG00000113960	AL953907.2	zmp_ph198_D8r	wt_t3_het_baz1	0.650624
ENSDARG00000113960	AL953907.2	zmp_ph198_E3r	wt_t3_het_baz1	1.25942
ENSDARG00000113960	AL953907.2	zmp_ph198_E6r	wt_t3_het_baz1	0.786692
ENSDARG00000113960	AL953907.2	zmp_ph198_E11r	wt_t3_het_baz1	1.18297
ENSDARG00000113960	AL953907.2	zmp_ph198_E12r	wt_t3_het_baz1	0.755921
ENSDARG00000113960	AL953907.2	zmp_ph198_F1r	wt_t3_het_baz1	0.386087
ENSDARG00000113960	AL953907.2	zmp_ph198_A6r	het_t3_het_baz1	0.701957
ENSDARG00000113960	AL953907.2	zmp_ph198_A8r	het_t3_het_baz1	1.20461
ENSDARG00000113960	AL953907.2	zmp_ph198_A10r	het_t3_het_baz1	0.952492
ENSDARG00000113960	AL953907.2	zmp_ph198_B3r	het_t3_het_baz1	1.11272
ENSDARG00000113960	AL953907.2	zmp_ph198_B7r	het_t3_het_baz1	1.06191
ENSDARG00000113960	AL953907.2	zmp_ph198_C3r	het_t3_het_baz1	0.235111
ENSDARG00000113960	AL953907.2	zmp_ph198_C9r	het_t3_het_baz1	0.531918
ENSDARG00000113960	AL953907.2	zmp_ph198_C10r	het_t3_het_baz1	0.752348
ENSDARG00000113960	AL953907.2	zmp_ph198_D5r	het_t3_het_baz1	1.00865
ENSDARG00000113960	AL953907.2	zmp_ph198_D9r	het_t3_het_baz1	1.00915
ENSDARG00000113960	AL953907.2	zmp_ph198_D10r	het_t3_het_baz1	0.843858
ENSDARG00000113960	AL953907.2	zmp_ph198_D12r	het_t3_het_baz1	0.924607
ENSDARG00000109888	CR388047.2	zmp_ph198_A4r	wt_t3_wt_baz1	-0.941961
ENSDARG00000109888	CR388047.2	zmp_ph198_A5r	wt_t3_wt_baz1	-0.68333
ENSDARG00000109888	CR388047.2	zmp_ph198_A7r	wt_t3_wt_baz1	-0.914931
ENSDARG00000109888	CR388047.2	zmp_ph198_A11r	wt_t3_wt_baz1	-1.41558
ENSDARG00000109888	CR388047.2	zmp_ph198_B6r	wt_t3_wt_baz1	-1.12216
ENSDARG00000109888	CR388047.2	zmp_ph198_C1r	wt_t3_wt_baz1	-1.03259
ENSDARG00000109888	CR388047.2	zmp_ph198_C2r	wt_t3_wt_baz1	-1.21641
ENSDARG00000109888	CR388047.2	zmp_ph198_C4r	wt_t3_wt_baz1	-0.616764
ENSDARG00000109888	CR388047.2	zmp_ph198_C11r	wt_t3_wt_baz1	-0.591263
ENSDARG00000109888	CR388047.2	zmp_ph198_D1r	wt_t3_wt_baz1	-1.41558
ENSDARG00000109888	CR388047.2	zmp_ph198_D2r	wt_t3_wt_baz1	-0.983229
ENSDARG00000109888	CR388047.2	zmp_ph198_D3r	wt_t3_wt_baz1	-0.969991
ENSDARG00000109888	CR388047.2	zmp_ph198_A3r	het_t3_wt_baz1	-0.295667
ENSDARG00000109888	CR388047.2	zmp_ph198_B2r	het_t3_wt_baz1	-0.858968
ENSDARG00000109888	CR388047.2	zmp_ph198_B8r	het_t3_wt_baz1	-0.699948
ENSDARG00000109888	CR388047.2	zmp_ph198_B9r	het_t3_wt_baz1	-0.070288
ENSDARG00000109888	CR388047.2	zmp_ph198_B10r	het_t3_wt_baz1	-0.645219
ENSDARG00000109888	CR388047.2	zmp_ph198_B11r	het_t3_wt_baz1	-0.322169
ENSDARG00000109888	CR388047.2	zmp_ph198_C5r	het_t3_wt_baz1	-0.758414
ENSDARG00000109888	CR388047.2	zmp_ph198_C8r	het_t3_wt_baz1	-0.902318
ENSDARG00000109888	CR388047.2	zmp_ph198_D7r	het_t3_wt_baz1	-1.34695
ENSDARG00000109888	CR388047.2	zmp_ph198_D11r	het_t3_wt_baz1	-1.16512
ENSDARG00000109888	CR388047.2	zmp_ph198_E2r	het_t3_wt_baz1	-0.419549
ENSDARG00000109888	CR388047.2	zmp_ph198_E4r	het_t3_wt_baz1	-0.914882
ENSDARG00000109888	CR388047.2	zmp_ph198_A9r	wt_t3_het_baz1	0.138715
ENSDARG00000109888	CR388047.2	zmp_ph198_B4r	wt_t3_het_baz1	0.217901
ENSDARG00000109888	CR388047.2	zmp_ph198_B5r	wt_t3_het_baz1	3.01856
ENSDARG00000109888	CR388047.2	zmp_ph198_C6r	wt_t3_het_baz1	0.469723
ENSDARG00000109888	CR388047.2	zmp_ph198_D4r	wt_t3_het_baz1	0.572568
ENSDARG00000109888	CR388047.2	zmp_ph198_D6r	wt_t3_het_baz1	1.68752
ENSDARG00000109888	CR388047.2	zmp_ph198_D8r	wt_t3_het_baz1	0.957601
ENSDARG00000109888	CR388047.2	zmp_ph198_E3r	wt_t3_het_baz1	0.687919
ENSDARG00000109888	CR388047.2	zmp_ph198_E6r	wt_t3_het_baz1	0.821668
ENSDARG00000109888	CR388047.2	zmp_ph198_E11r	wt_t3_het_baz1	0.375876
ENSDARG00000109888	CR388047.2	zmp_ph198_E12r	wt_t3_het_baz1	0.382065
ENSDARG00000109888	CR388047.2	zmp_ph198_F1r	wt_t3_het_baz1	0.497723
ENSDARG00000109888	CR388047.2	zmp_ph198_A6r	het_t3_het_baz1	1.84582
ENSDARG00000109888	CR388047.2	zmp_ph198_A8r	het_t3_het_baz1	0.770758
ENSDARG00000109888	CR388047.2	zmp_ph198_A10r	het_t3_het_baz1	1.51575
ENSDARG00000109888	CR388047.2	zmp_ph198_B3r	het_t3_het_baz1	0.661428
ENSDARG00000109888	CR388047.2	zmp_ph198_B7r	het_t3_het_baz1	0.553501
ENSDARG00000109888	CR388047.2	zmp_ph198_C3r	het_t3_het_baz1	0.828332
ENSDARG00000109888	CR388047.2	zmp_ph198_C9r	het_t3_het_baz1	0.510011
ENSDARG00000109888	CR388047.2	zmp_ph198_C10r	het_t3_het_baz1	0.416451
ENSDARG00000109888	CR388047.2	zmp_ph198_D5r	het_t3_het_baz1	0.466369
ENSDARG00000109888	CR388047.2	zmp_ph198_D9r	het_t3_het_baz1	0.907491
ENSDARG00000109888	CR388047.2	zmp_ph198_D10r	het_t3_het_baz1	0.467486
ENSDARG00000109888	CR388047.2	zmp_ph198_D12r	het_t3_het_baz1	1.53203
ENSDARG00000111638	CABZ01040998.1	zmp_ph198_A4r	wt_t3_wt_baz1	-1.32569
ENSDARG00000111638	CABZ01040998.1	zmp_ph198_A5r	wt_t3_wt_baz1	0.100223
ENSDARG00000111638	CABZ01040998.1	zmp_ph198_A7r	wt_t3_wt_baz1	-0.991437
ENSDARG00000111638	CABZ01040998.1	zmp_ph198_A11r	wt_t3_wt_baz1	-0.708116
ENSDARG00000111638	CABZ01040998.1	zmp_ph198_B6r	wt_t3_wt_baz1	0.143545
ENSDARG00000111638	CABZ01040998.1	zmp_ph198_C1r	wt_t3_wt_baz1	-0.686437
ENSDARG00000111638	CABZ01040998.1	zmp_ph198_C2r	wt_t3_wt_baz1	-0.660819
ENSDARG00000111638	CABZ01040998.1	zmp_ph198_C4r	wt_t3_wt_baz1	-1.32569
ENSDARG00000111638	CABZ01040998.1	zmp_ph198_C11r	wt_t3_wt_baz1	-0.637751
ENSDARG00000111638	CABZ01040998.1	zmp_ph198_D1r	wt_t3_wt_baz1	-0.703057
ENSDARG00000111638	CABZ01040998.1	zmp_ph198_D2r	wt_t3_wt_baz1	-0.500956
ENSDARG00000111638	CABZ01040998.1	zmp_ph198_D3r	wt_t3_wt_baz1	-1.07778
ENSDARG00000111638	CABZ01040998.1	zmp_ph198_A3r	het_t3_wt_baz1	0.309921
ENSDARG00000111638	CABZ01040998.1	zmp_ph198_B2r	het_t3_wt_baz1	-1.09343
ENSDARG00000111638	CABZ01040998.1	zmp_ph198_B8r	het_t3_wt_baz1	-0.429837
ENSDARG00000111638	CABZ01040998.1	zmp_ph198_B9r	het_t3_wt_baz1	-1.32569
ENSDARG00000111638	CABZ01040998.1	zmp_ph198_B10r	het_t3_wt_baz1	-1.00424
ENSDARG00000111638	CABZ01040998.1	zmp_ph198_B11r	het_t3_wt_baz1	-0.92013
ENSDARG00000111638	CABZ01040998.1	zmp_ph198_C5r	het_t3_wt_baz1	-0.448182
ENSDARG00000111638	CABZ01040998.1	zmp_ph198_C8r	het_t3_wt_baz1	-1.11152
ENSDARG00000111638	CABZ01040998.1	zmp_ph198_D7r	het_t3_wt_baz1	-0.638357
ENSDARG00000111638	CABZ01040998.1	zmp_ph198_D11r	het_t3_wt_baz1	-1.04699
ENSDARG00000111638	CABZ01040998.1	zmp_ph198_E2r	het_t3_wt_baz1	-1.06993
ENSDARG00000111638	CABZ01040998.1	zmp_ph198_E4r	het_t3_wt_baz1	-0.6989
ENSDARG00000111638	CABZ01040998.1	zmp_ph198_A9r	wt_t3_het_baz1	0.403848
ENSDARG00000111638	CABZ01040998.1	zmp_ph198_B4r	wt_t3_het_baz1	0.340491
ENSDARG00000111638	CABZ01040998.1	zmp_ph198_B5r	wt_t3_het_baz1	1.25883
ENSDARG00000111638	CABZ01040998.1	zmp_ph198_C6r	wt_t3_het_baz1	0.86339
ENSDARG00000111638	CABZ01040998.1	zmp_ph198_D4r	wt_t3_het_baz1	-0.140526
ENSDARG00000111638	CABZ01040998.1	zmp_ph198_D6r	wt_t3_het_baz1	-0.174701
ENSDARG00000111638	CABZ01040998.1	zmp_ph198_D8r	wt_t3_het_baz1	-0.33541
ENSDARG00000111638	CABZ01040998.1	zmp_ph198_E3r	wt_t3_het_baz1	0.0787078
ENSDARG00000111638	CABZ01040998.1	zmp_ph198_E6r	wt_t3_het_baz1	0.54143
ENSDARG00000111638	CABZ01040998.1	zmp_ph198_E11r	wt_t3_het_baz1	1.82185
ENSDARG00000111638	CABZ01040998.1	zmp_ph198_E12r	wt_t3_het_baz1	1.81768
ENSDARG00000111638	CABZ01040998.1	zmp_ph198_F1r	wt_t3_het_baz1	-0.109106
ENSDARG00000111638	CABZ01040998.1	zmp_ph198_A6r	het_t3_het_baz1	0.558662
ENSDARG00000111638	CABZ01040998.1	zmp_ph198_A8r	het_t3_het_baz1	0.333067
ENSDARG00000111638	CABZ01040998.1	zmp_ph198_A10r	het_t3_het_baz1	0.631409
ENSDARG00000111638	CABZ01040998.1	zmp_ph198_B3r	het_t3_het_baz1	0.754379
ENSDARG00000111638	CABZ01040998.1	zmp_ph198_B7r	het_t3_het_baz1	2.16636
ENSDARG00000111638	CABZ01040998.1	zmp_ph198_C3r	het_t3_het_baz1	0.338916
ENSDARG00000111638	CABZ01040998.1	zmp_ph198_C9r	het_t3_het_baz1	0.0853539
ENSDARG00000111638	CABZ01040998.1	zmp_ph198_C10r	het_t3_het_baz1	0.203251
ENSDARG00000111638	CABZ01040998.1	zmp_ph198_D5r	het_t3_het_baz1	1.7072
ENSDARG00000111638	CABZ01040998.1	zmp_ph198_D9r	het_t3_het_baz1	1.70887
ENSDARG00000111638	CABZ01040998.1	zmp_ph198_D10r	het_t3_het_baz1	0.314171
ENSDARG00000111638	CABZ01040998.1	zmp_ph198_D12r	het_t3_het_baz1	2.68314
ENSDARG00000093476	si:dkey-175d9.2	zmp_ph198_A4r	wt_t3_wt_baz1	-0.589188
ENSDARG00000093476	si:dkey-175d9.2	zmp_ph198_A5r	wt_t3_wt_baz1	-0.589188
ENSDARG00000093476	si:dkey-175d9.2	zmp_ph198_A7r	wt_t3_wt_baz1	-0.589188
ENSDARG00000093476	si:dkey-175d9.2	zmp_ph198_A11r	wt_t3_wt_baz1	-0.589188
ENSDARG00000093476	si:dkey-175d9.2	zmp_ph198_B6r	wt_t3_wt_baz1	-0.589188
ENSDARG00000093476	si:dkey-175d9.2	zmp_ph198_C1r	wt_t3_wt_baz1	-0.589188
ENSDARG00000093476	si:dkey-175d9.2	zmp_ph198_C2r	wt_t3_wt_baz1	-0.589188
ENSDARG00000093476	si:dkey-175d9.2	zmp_ph198_C4r	wt_t3_wt_baz1	-0.589188
ENSDARG00000093476	si:dkey-175d9.2	zmp_ph198_C11r	wt_t3_wt_baz1	-0.589188
ENSDARG00000093476	si:dkey-175d9.2	zmp_ph198_D1r	wt_t3_wt_baz1	-0.589188
ENSDARG00000093476	si:dkey-175d9.2	zmp_ph198_D2r	wt_t3_wt_baz1	-0.589188
ENSDARG00000093476	si:dkey-175d9.2	zmp_ph198_D3r	wt_t3_wt_baz1	-0.589188
ENSDARG00000093476	si:dkey-175d9.2	zmp_ph198_A3r	het_t3_wt_baz1	-0.589188
ENSDARG00000093476	si:dkey-175d9.2	zmp_ph198_B2r	het_t3_wt_baz1	-0.589188
ENSDARG00000093476	si:dkey-175d9.2	zmp_ph198_B8r	het_t3_wt_baz1	-0.589188
ENSDARG00000093476	si:dkey-175d9.2	zmp_ph198_B9r	het_t3_wt_baz1	-0.589188
ENSDARG00000093476	si:dkey-175d9.2	zmp_ph198_B10r	het_t3_wt_baz1	-0.589188
ENSDARG00000093476	si:dkey-175d9.2	zmp_ph198_B11r	het_t3_wt_baz1	-0.589188
ENSDARG00000093476	si:dkey-175d9.2	zmp_ph198_C5r	het_t3_wt_baz1	-0.589188
ENSDARG00000093476	si:dkey-175d9.2	zmp_ph198_C8r	het_t3_wt_baz1	-0.589188
ENSDARG00000093476	si:dkey-175d9.2	zmp_ph198_D7r	het_t3_wt_baz1	-0.589188
ENSDARG00000093476	si:dkey-175d9.2	zmp_ph198_D11r	het_t3_wt_baz1	-0.589188
ENSDARG00000093476	si:dkey-175d9.2	zmp_ph198_E2r	het_t3_wt_baz1	-0.589188
ENSDARG00000093476	si:dkey-175d9.2	zmp_ph198_E4r	het_t3_wt_baz1	-0.589188
ENSDARG00000093476	si:dkey-175d9.2	zmp_ph198_A9r	wt_t3_het_baz1	-0.589188
ENSDARG00000093476	si:dkey-175d9.2	zmp_ph198_B4r	wt_t3_het_baz1	-0.589188
ENSDARG00000093476	si:dkey-175d9.2	zmp_ph198_B5r	wt_t3_het_baz1	0.754143
ENSDARG00000093476	si:dkey-175d9.2	zmp_ph198_C6r	wt_t3_het_baz1	0.975283
ENSDARG00000093476	si:dkey-175d9.2	zmp_ph198_D4r	wt_t3_het_baz1	-0.589188
ENSDARG00000093476	si:dkey-175d9.2	zmp_ph198_D6r	wt_t3_het_baz1	1.05597
ENSDARG00000093476	si:dkey-175d9.2	zmp_ph198_D8r	wt_t3_het_baz1	-0.589188
ENSDARG00000093476	si:dkey-175d9.2	zmp_ph198_E3r	wt_t3_het_baz1	0.557878
ENSDARG00000093476	si:dkey-175d9.2	zmp_ph198_E6r	wt_t3_het_baz1	0.935813
ENSDARG00000093476	si:dkey-175d9.2	zmp_ph198_E11r	wt_t3_het_baz1	2.11015
ENSDARG00000093476	si:dkey-175d9.2	zmp_ph198_E12r	wt_t3_het_baz1	0.227712
ENSDARG00000093476	si:dkey-175d9.2	zmp_ph198_F1r	wt_t3_het_baz1	-0.589188
ENSDARG00000093476	si:dkey-175d9.2	zmp_ph198_A6r	het_t3_het_baz1	0.00934119
ENSDARG00000093476	si:dkey-175d9.2	zmp_ph198_A8r	het_t3_het_baz1	-0.589188
ENSDARG00000093476	si:dkey-175d9.2	zmp_ph198_A10r	het_t3_het_baz1	0.343266
ENSDARG00000093476	si:dkey-175d9.2	zmp_ph198_B3r	het_t3_het_baz1	0.732202
ENSDARG00000093476	si:dkey-175d9.2	zmp_ph198_B7r	het_t3_het_baz1	0.585243
ENSDARG00000093476	si:dkey-175d9.2	zmp_ph198_C3r	het_t3_het_baz1	4.16939
ENSDARG00000093476	si:dkey-175d9.2	zmp_ph198_C9r	het_t3_het_baz1	1.65177
ENSDARG00000093476	si:dkey-175d9.2	zmp_ph198_C10r	het_t3_het_baz1	0.139272
ENSDARG00000093476	si:dkey-175d9.2	zmp_ph198_D5r	het_t3_het_baz1	1.88797
ENSDARG00000093476	si:dkey-175d9.2	zmp_ph198_D9r	het_t3_het_baz1	0.374683
ENSDARG00000093476	si:dkey-175d9.2	zmp_ph198_D10r	het_t3_het_baz1	1.75473
ENSDARG00000093476	si:dkey-175d9.2	zmp_ph198_D12r	het_t3_het_baz1	-0.589188
