# Supplementary material for: Allele-specific gene expression can underlie altered transcript abundance in zebrafish mutants
Source: eLife. 2022 Feb 17;11:e72825. doi: 10.7554/eLife.72825 (PMC8884726; doi:10.7554/eLife.72825)
Supplement: Supplementary file 2. — Binomial test results for each chromosome in each experiment. [file elife-72825-supp2.xlsx]

## Sheet: suppl-table1-chr-enrich
Chromosome enrichment results. Binomial test results for each chromosome in each experiment.
expt	Allele	GeneName	GeneID	chr	pval	padj	all_genes	genes_on_chr	sig_genes	sig_genes_on_chr	null_value	estimate	conf_lower	conf_upper	MutantChr		Key
capzb1_hi1858bTg	capzb/hi1858bTg	capzb	ENSDARG00000100252	1	0.845149	1	13812	616	160	5	0.0445989	0.03125	0.0123925	1	22		Chr NOT enriched
capzb1_hi1858bTg	capzb/hi1858bTg	capzb	ENSDARG00000100252	2	0.772169	1	13812	653	160	6	0.0472777	0.0375	0.016455	1	22		Mutant Chr is enriched
capzb1_hi1858bTg	capzb/hi1858bTg	capzb	ENSDARG00000100252	3	0.0389932	0.97483	13812	715	160	14	0.0517666	0.0875	0.0536752	1	22		Non-mutant Chr is enriched
capzb1_hi1858bTg	capzb/hi1858bTg	capzb	ENSDARG00000100252	4	0.200685	1	13812	484	160	8	0.035042	0.05	0.0251196	1	22
capzb1_hi1858bTg	capzb/hi1858bTg	capzb	ENSDARG00000100252	5	0.995832	1	13812	801	160	3	0.057993	0.01875	0.00512959	1	22		Description of column names
capzb1_hi1858bTg	capzb/hi1858bTg	capzb	ENSDARG00000100252	6	0.739232	1	13812	628	160	6	0.0454677	0.0375	0.016455	1	22		expt	unique id for each experiment
capzb1_hi1858bTg	capzb/hi1858bTg	capzb	ENSDARG00000100252	7	0.839463	1	13812	714	160	6	0.0516942	0.0375	0.016455	1	22		Allele	id for mutant alleles
capzb1_hi1858bTg	capzb/hi1858bTg	capzb	ENSDARG00000100252	8	0.526345	1	13812	589	160	7	0.0426441	0.04375	0.0207105	1	22		GeneName	name of the mutant gene
capzb1_hi1858bTg	capzb/hi1858bTg	capzb	ENSDARG00000100252	9	0.942409	1	13812	520	160	3	0.0376484	0.01875	0.00512959	1	22		GeneID	Ensembl id of mutant gene
capzb1_hi1858bTg	capzb/hi1858bTg	capzb	ENSDARG00000100252	10	0.125924	1	13812	498	160	9	0.0360556	0.05625	0.0296551	1	22		chr	Chromosome
capzb1_hi1858bTg	capzb/hi1858bTg	capzb	ENSDARG00000100252	11	0.820063	1	13812	488	160	4	0.0353316	0.025	0.00858353	1	22		pval	p value
capzb1_hi1858bTg	capzb/hi1858bTg	capzb	ENSDARG00000100252	12	0.844376	1	13812	509	160	4	0.036852	0.025	0.00858353	1	22		padj	Adjusted p value
capzb1_hi1858bTg	capzb/hi1858bTg	capzb	ENSDARG00000100252	13	0.758871	1	13812	544	160	5	0.039386	0.03125	0.0123925	1	22		all_genes	Number of genes detected within the experiment
capzb1_hi1858bTg	capzb/hi1858bTg	capzb	ENSDARG00000100252	14	0.239031	1	13812	509	160	8	0.036852	0.05	0.0251196	1	22		genes_on_chr	Number of genes on the mutant chromosome
capzb1_hi1858bTg	capzb/hi1858bTg	capzb	ENSDARG00000100252	15	0.0561646	1	13812	484	160	10	0.035042	0.0625	0.034297	1	22		sig_genes	Number of differentially expressed genes
capzb1_hi1858bTg	capzb/hi1858bTg	capzb	ENSDARG00000100252	16	0.162251	1	13812	602	160	10	0.0435853	0.0625	0.034297	1	22		sig_genes_on_chr	Number of differentially expressed genes on the mutant chromosome
capzb1_hi1858bTg	capzb/hi1858bTg	capzb	ENSDARG00000100252	17	0.721705	1	13812	519	160	5	0.037576	0.03125	0.0123925	1	22		null_value	Expected fraction of genes on the mutant chromosome given the number of differentially expressed genes and assuming the locations of the genes are random (genes_on_chr/all_genes)
capzb1_hi1858bTg	capzb/hi1858bTg	capzb	ENSDARG00000100252	18	0.994635	1	13812	444	160	1	0.032146	0.00625	0.000320532	1	22		estimate	Observed fraction of differentially expressed genes on mutant chromosome (sig_genes_on_chr/sig_genes)
capzb1_hi1858bTg	capzb/hi1858bTg	capzb	ENSDARG00000100252	19	0.546059	1	13812	600	160	7	0.0434405	0.04375	0.0207105	1	22		conf_lower	Lower bound of 95% confidence interval
capzb1_hi1858bTg	capzb/hi1858bTg	capzb	ENSDARG00000100252	20	0.214335	1	13812	568	160	9	0.0411237	0.05625	0.0296551	1	22		conf_upper	Upper bound of 95% confidence interval
capzb1_hi1858bTg	capzb/hi1858bTg	capzb	ENSDARG00000100252	21	0.984518	1	13812	521	160	2	0.0377208	0.0125	0.0022255	1	22		MutantChr	Chromosome containing the mutant gene
capzb1_hi1858bTg	capzb/hi1858bTg	capzb	ENSDARG00000100252	22	0.000284101	0.00710253	13812	454	160	15	0.03287	0.09375	0.0586795	1	22
capzb1_hi1858bTg	capzb/hi1858bTg	capzb	ENSDARG00000100252	23	0.748852	1	13812	537	160	5	0.0388792	0.03125	0.0123925	1	22
capzb1_hi1858bTg	capzb/hi1858bTg	capzb	ENSDARG00000100252	24	0.499186	1	13812	402	160	5	0.0291051	0.03125	0.0123925	1	22
capzb1_hi1858bTg	capzb/hi1858bTg	capzb	ENSDARG00000100252	25	0.859976	1	13812	413	160	3	0.0299015	0.01875	0.00512959	1	22
dnmt8	sa3105/sa617	dnmt3aa	ENSDARG00000005394	1	0.537885	1	2668	112	18	1	0.041979	0.0555556	0.00284557	1	20
dnmt8	sa3105/sa617	dnmt3aa	ENSDARG00000005394	2	1	1	2668	124	18	0	0.0464768	0	0	1	20
dnmt8	sa3105/sa617	dnmt3aa	ENSDARG00000005394	3	1	1	2668	177	18	0	0.0663418	0	0	1	20
dnmt8	sa3105/sa617	dnmt3aa	ENSDARG00000005394	4	0.117528	1	2668	88	18	2	0.0329835	0.111111	0.0201107	1	20
dnmt8	sa3105/sa617	dnmt3aa	ENSDARG00000005394	5	1	1	2668	150	18	0	0.0562219	0	0	1	20
dnmt8	sa3105/sa617	dnmt3aa	ENSDARG00000005394	6	1	1	2668	138	18	0	0.0517241	0	0	1	20
dnmt8	sa3105/sa617	dnmt3aa	ENSDARG00000005394	7	1	1	2668	132	18	0	0.0494753	0	0	1	20
dnmt8	sa3105/sa617	dnmt3aa	ENSDARG00000005394	8	1	1	2668	103	18	0	0.0386057	0	0	1	20
dnmt8	sa3105/sa617	dnmt3aa	ENSDARG00000005394	9	1	1	2668	107	18	0	0.0401049	0	0	1	20
dnmt8	sa3105/sa617	dnmt3aa	ENSDARG00000005394	10	1	1	2668	100	18	0	0.0374813	0	0	1	20
dnmt8	sa3105/sa617	dnmt3aa	ENSDARG00000005394	11	0.47932	1	2668	95	18	1	0.0356072	0.0555556	0.00284557	1	20
dnmt8	sa3105/sa617	dnmt3aa	ENSDARG00000005394	12	1	1	2668	85	18	0	0.0318591	0	0	1	20
dnmt8	sa3105/sa617	dnmt3aa	ENSDARG00000005394	13	1	1	2668	105	18	0	0.0393553	0	0	1	20
dnmt8	sa3105/sa617	dnmt3aa	ENSDARG00000005394	14	1	1	2668	94	18	0	0.0352324	0	0	1	20
dnmt8	sa3105/sa617	dnmt3aa	ENSDARG00000005394	15	1	1	2668	82	18	0	0.0307346	0	0	1	20
dnmt8	sa3105/sa617	dnmt3aa	ENSDARG00000005394	16	0.534619	1	2668	111	18	1	0.0416042	0.0555556	0.00284557	1	20
dnmt8	sa3105/sa617	dnmt3aa	ENSDARG00000005394	17	0.119746	1	2668	89	18	2	0.0333583	0.111111	0.0201107	1	20
dnmt8	sa3105/sa617	dnmt3aa	ENSDARG00000005394	18	1	1	2668	86	18	0	0.0322339	0	0	1	20
dnmt8	sa3105/sa617	dnmt3aa	ENSDARG00000005394	19	0.220429	1	2668	131	18	2	0.0491004	0.111111	0.0201107	1	20
dnmt8	sa3105/sa617	dnmt3aa	ENSDARG00000005394	20	0.000401604	0.0100401	2668	99	18	5	0.0371064	0.277778	0.116426	1	20
dnmt8	sa3105/sa617	dnmt3aa	ENSDARG00000005394	21	0.547551	1	2668	115	18	1	0.0431034	0.0555556	0.00284557	1	20
dnmt8	sa3105/sa617	dnmt3aa	ENSDARG00000005394	22	1	1	2668	79	18	0	0.0296102	0	0	1	20
dnmt8	sa3105/sa617	dnmt3aa	ENSDARG00000005394	23	0.52134	1	2668	107	18	1	0.0401049	0.0555556	0.00284557	1	20
dnmt8	sa3105/sa617	dnmt3aa	ENSDARG00000005394	24	1	1	2668	80	18	0	0.029985	0	0	1	20
dnmt8	sa3105/sa617	dnmt3aa	ENSDARG00000005394	25	0.0981119	1	2668	79	18	2	0.0296102	0.111111	0.0201107	1	20
ffr	p9emcf	vps51	ENSDARG00000062016	1	0.110697	1	13147	609	1119	61	0.0463224	0.054513	0.0437855	1	10
ffr	p9emcf	vps51	ENSDARG00000062016	2	0.419351	1	13147	625	1119	55	0.0475394	0.049151	0.0389677	1	10
ffr	p9emcf	vps51	ENSDARG00000062016	3	0.324077	1	13147	707	1119	64	0.0537765	0.0571939	0.046206	1	10
ffr	p9emcf	vps51	ENSDARG00000062016	4	0.0982828	1	13147	410	1119	43	0.0311858	0.0384272	0.0294442	1	10
ffr	p9emcf	vps51	ENSDARG00000062016	5	0.939327	1	13147	756	1119	53	0.0575036	0.0473637	0.0373693	1	10
ffr	p9emcf	vps51	ENSDARG00000062016	6	0.747291	1	13147	602	1119	47	0.0457899	0.0420018	0.0325998	1	10
ffr	p9emcf	vps51	ENSDARG00000062016	7	0.765627	1	13147	693	1119	54	0.0527116	0.0482574	0.038168	1	10
ffr	p9emcf	vps51	ENSDARG00000062016	8	0.886569	1	13147	559	1119	40	0.0425192	0.0357462	0.027092	1	10
ffr	p9emcf	vps51	ENSDARG00000062016	9	0.424735	1	13147	487	1119	43	0.0370427	0.0384272	0.0294442	1	10
ffr	p9emcf	vps51	ENSDARG00000062016	10	4.05167e-07	1.01292e-05	13147	483	1119	76	0.0367384	0.0679178	0.0559549	1	10
ffr	p9emcf	vps51	ENSDARG00000062016	11	0.504666	1	13147	455	1119	39	0.0346087	0.0348525	0.026311	1	10
ffr	p9emcf	vps51	ENSDARG00000062016	12	0.607586	1	13147	486	1119	40	0.0369666	0.0357462	0.027092	1	10
ffr	p9emcf	vps51	ENSDARG00000062016	13	0.500593	1	13147	513	1119	44	0.0390203	0.0393208	0.0302312	1	10
ffr	p9emcf	vps51	ENSDARG00000062016	14	0.705621	1	13147	494	1119	39	0.0375751	0.0348525	0.026311	1	10
ffr	p9emcf	vps51	ENSDARG00000062016	15	0.649252	1	13147	458	1119	37	0.0348368	0.0330652	0.0247537	1	10
ffr	p9emcf	vps51	ENSDARG00000062016	16	0.432785	1	13147	593	1119	52	0.0451053	0.0464701	0.0365716	1	10
ffr	p9emcf	vps51	ENSDARG00000062016	17	0.947059	1	13147	487	1119	32	0.0370427	0.028597	0.0208923	1	10
ffr	p9emcf	vps51	ENSDARG00000062016	18	0.906606	1	13147	412	1119	28	0.0313379	0.0250223	0.0178412	1	10
ffr	p9emcf	vps51	ENSDARG00000062016	19	0.871732	1	13147	553	1119	40	0.0420628	0.0357462	0.027092	1	10
ffr	p9emcf	vps51	ENSDARG00000062016	20	0.54479	1	13147	557	1119	47	0.0423671	0.0420018	0.0325998	1	10
ffr	p9emcf	vps51	ENSDARG00000062016	21	0.250863	1	13147	497	1119	47	0.0378033	0.0420018	0.0325998	1	10
ffr	p9emcf	vps51	ENSDARG00000062016	22	0.830892	1	13147	425	1119	31	0.0323268	0.0277033	0.020126	1	10
ffr	p9emcf	vps51	ENSDARG00000062016	23	0.43943	1	13147	513	1119	45	0.0390203	0.0402145	0.0310194	1	10
ffr	p9emcf	vps51	ENSDARG00000062016	24	0.824207	1	13147	385	1119	28	0.0292842	0.0250223	0.0178412	1	10
ffr	p9emcf	vps51	ENSDARG00000062016	25	0.455593	1	13147	388	1119	34	0.0295124	0.0303843	0.0224311	1	10
gmds_p31erb	gmds/p31erb	gmds	ENSDARG00000026629	1	0.170898	1	6494	301	116	8	0.0463505	0.0689655	0.0347766	1	20
gmds_p31erb	gmds/p31erb	gmds	ENSDARG00000026629	2	0.338261	1	6494	317	116	7	0.0488143	0.0603448	0.0286613	1	20
gmds_p31erb	gmds/p31erb	gmds	ENSDARG00000026629	3	0.782558	1	6494	363	116	5	0.0558978	0.0431034	0.0171353	1	20
gmds_p31erb	gmds/p31erb	gmds	ENSDARG00000026629	4	0.300873	1	6494	204	116	5	0.0314136	0.0431034	0.0171353	1	20
gmds_p31erb	gmds/p31erb	gmds	ENSDARG00000026629	5	0.458611	1	6494	358	116	7	0.0551278	0.0603448	0.0286613	1	20
gmds_p31erb	gmds/p31erb	gmds	ENSDARG00000026629	6	0.639855	1	6494	305	116	5	0.0469664	0.0431034	0.0171353	1	20
gmds_p31erb	gmds/p31erb	gmds	ENSDARG00000026629	7	0.722303	1	6494	336	116	5	0.0517401	0.0431034	0.0171353	1	20
gmds_p31erb	gmds/p31erb	gmds	ENSDARG00000026629	8	0.0900238	1	6494	257	116	8	0.039575	0.0689655	0.0347766	1	20
gmds_p31erb	gmds/p31erb	gmds	ENSDARG00000026629	9	0.456141	1	6494	248	116	5	0.0381891	0.0431034	0.0171353	1	20
gmds_p31erb	gmds/p31erb	gmds	ENSDARG00000026629	10	0.559486	1	6494	221	116	4	0.0340314	0.0344828	0.0118627	1	20
gmds_p31erb	gmds/p31erb	gmds	ENSDARG00000026629	11	0.417499	1	6494	237	116	5	0.0364952	0.0431034	0.0171353	1	20
gmds_p31erb	gmds/p31erb	gmds	ENSDARG00000026629	12	1	1	6494	228	116	0	0.0351093	0	0	1	20
gmds_p31erb	gmds/p31erb	gmds	ENSDARG00000026629	13	0.301797	1	6494	254	116	6	0.039113	0.0517241	0.0227627	1	20
gmds_p31erb	gmds/p31erb	gmds	ENSDARG00000026629	14	0.176941	1	6494	257	116	7	0.039575	0.0603448	0.0286613	1	20
gmds_p31erb	gmds/p31erb	gmds	ENSDARG00000026629	15	0.979869	1	6494	215	116	1	0.0331075	0.00862069	0.000442086	1	20
gmds_p31erb	gmds/p31erb	gmds	ENSDARG00000026629	16	0.736254	1	6494	278	116	4	0.0428087	0.0344828	0.0118627	1	20
gmds_p31erb	gmds/p31erb	gmds	ENSDARG00000026629	17	0.339483	1	6494	215	116	5	0.0331075	0.0431034	0.0171353	1	20
gmds_p31erb	gmds/p31erb	gmds	ENSDARG00000026629	18	0.975787	1	6494	205	116	1	0.0315676	0.00862069	0.000442086	1	20
gmds_p31erb	gmds/p31erb	gmds	ENSDARG00000026629	19	0.904131	1	6494	297	116	3	0.0457345	0.0258621	0.00708536	1	20
gmds_p31erb	gmds/p31erb	gmds	ENSDARG00000026629	20	0.514403	1	6494	265	116	5	0.0408069	0.0431034	0.0171353	1	20
gmds_p31erb	gmds/p31erb	gmds	ENSDARG00000026629	21	0.853046	1	6494	263	116	3	0.0404989	0.0258621	0.00708536	1	20
gmds_p31erb	gmds/p31erb	gmds	ENSDARG00000026629	22	0.318347	1	6494	209	116	5	0.0321836	0.0431034	0.0171353	1	20
gmds_p31erb	gmds/p31erb	gmds	ENSDARG00000026629	23	0.576376	1	6494	284	116	5	0.0437327	0.0431034	0.0171353	1	20
gmds_p31erb	gmds/p31erb	gmds	ENSDARG00000026629	24	0.457399	1	6494	194	116	4	0.0298737	0.0344828	0.0118627	1	20
gmds_p31erb	gmds/p31erb	gmds	ENSDARG00000026629	25	0.63797	1	6494	183	116	3	0.0281799	0.0258621	0.00708536	1	20
hesx1			ENSDARG00000060734	1	0.99951	1	13227	556	1780	49	0.0420352	0.0275281	0.0214545	1	11
hesx1			ENSDARG00000060734	2	0.133762	1	13227	614	1780	93	0.0464202	0.0522472	0.0438444	1	11
hesx1			ENSDARG00000060734	3	0.448325	1	13227	709	1780	97	0.0536025	0.0544944	0.0459146	1	11
hesx1			ENSDARG00000060734	4	0.870035	1	13227	801	1780	97	0.0605579	0.0544944	0.0459146	1	11
hesx1			ENSDARG00000060734	5	0.954121	1	13227	764	1780	87	0.0577606	0.0488764	0.0407475	1	11
hesx1			ENSDARG00000060734	6	0.0720312	1	13227	557	1780	88	0.0421108	0.0494382	0.0412629	1	11
hesx1			ENSDARG00000060734	7	0.00787491	0.196873	13227	712	1780	120	0.0538293	0.0674157	0.0578939	1	11
hesx1			ENSDARG00000060734	8	0.949139	1	13227	550	1780	61	0.0415816	0.0342697	0.0274732	1	11
hesx1			ENSDARG00000060734	9	0.998631	1	13227	455	1780	40	0.0343993	0.0224719	0.0170062	1	11
hesx1			ENSDARG00000060734	10	0.779601	1	13227	457	1780	56	0.0345505	0.0314607	0.024955	1	11
hesx1			ENSDARG00000060734	11	0.41528	1	13227	446	1780	62	0.0337189	0.0348315	0.0279784	1	11
hesx1			ENSDARG00000060734	12	0.000414321	0.010358	13227	443	1780	87	0.0334921	0.0488764	0.0407475	1	11
hesx1			ENSDARG00000060734	13	0.746942	1	13227	505	1780	63	0.0381795	0.0353933	0.0284841	1	11
hesx1			ENSDARG00000060734	14	0.051803	1	13227	472	1780	77	0.0356846	0.0432584	0.0356112	1	11
hesx1			ENSDARG00000060734	15	0.560949	1	13227	452	1780	60	0.0341725	0.0337079	0.0269684	1	11
hesx1			ENSDARG00000060734	16	0.000105421	0.00263552	13227	565	1780	110	0.0427157	0.0617978	0.0526709	1	11
hesx1			ENSDARG00000060734	17	0.943632	1	13227	465	1780	51	0.0351554	0.0286517	0.0224514	1	11
hesx1			ENSDARG00000060734	18	0.99353	1	13227	398	1780	37	0.03009	0.0207865	0.0155395	1	11
hesx1			ENSDARG00000060734	19	0.772347	1	13227	541	1780	67	0.0409012	0.0376404	0.0305118	1	11
hesx1			ENSDARG00000060734	20	0.536633	1	13227	568	1780	76	0.0429425	0.0426966	0.0350995	1	11
hesx1			ENSDARG00000060734	21	0.979962	1	13227	468	1780	48	0.0353822	0.0269663	0.0209571	1	11
hesx1			ENSDARG00000060734	22	0.00458235	0.114559	13227	509	1780	91	0.0384819	0.0511236	0.0428109	1	11
hesx1			ENSDARG00000060734	23	0.927979	1	13227	482	1780	54	0.0364406	0.0303371	0.0239517	1	11
hesx1			ENSDARG00000060734	24	0.708403	1	13227	344	1780	43	0.0260074	0.0241573	0.0184815	1	11
hesx1			ENSDARG00000060734	25	0.0445214	1	13227	394	1780	66	0.0297876	0.0370787	0.0300042	1	11
mitfa_w2	w2	mitfa	ENSDARG00000003732	1	0.847774	1	15577	699	41	1	0.0448739	0.0243902	0.00125027	1	6
mitfa_w2	w2	mitfa	ENSDARG00000003732	2	0.854343	1	15577	715	41	1	0.045901	0.0243902	0.00125027	1	6
mitfa_w2	w2	mitfa	ENSDARG00000003732	3	0.884867	1	15577	800	41	1	0.0513578	0.0243902	0.00125027	1	6
mitfa_w2	w2	mitfa	ENSDARG00000003732	4	0.545017	1	15577	687	41	2	0.0441035	0.0487805	0.00873672	1	6
mitfa_w2	w2	mitfa	ENSDARG00000003732	5	0.6967	1	15577	905	41	2	0.0580985	0.0487805	0.00873672	1	6
mitfa_w2	w2	mitfa	ENSDARG00000003732	6	0.00221442	0.0553605	15577	703	41	7	0.0451306	0.170732	0.0829793	1	6
mitfa_w2	w2	mitfa	ENSDARG00000003732	7	0.88064	1	15577	787	41	1	0.0505232	0.0243902	0.00125027	1	6
mitfa_w2	w2	mitfa	ENSDARG00000003732	8	0.534544	1	15577	674	41	2	0.0432689	0.0487805	0.00873672	1	6
mitfa_w2	w2	mitfa	ENSDARG00000003732	9	0.799659	1	15577	599	41	1	0.0384541	0.0243902	0.00125027	1	6
mitfa_w2	w2	mitfa	ENSDARG00000003732	10	1	1	15577	530	41	0	0.0340245	0	0	1	6
mitfa_w2	w2	mitfa	ENSDARG00000003732	11	0.162717	1	15577	530	41	3	0.0340245	0.0731707	0.0202398	1	6
mitfa_w2	w2	mitfa	ENSDARG00000003732	12	0.781339	1	15577	567	41	1	0.0363998	0.0243902	0.00125027	1	6
mitfa_w2	w2	mitfa	ENSDARG00000003732	13	0.477286	1	15577	606	41	2	0.0389035	0.0487805	0.00873672	1	6
mitfa_w2	w2	mitfa	ENSDARG00000003732	14	0.059609	1	15577	562	41	4	0.0360788	0.097561	0.034016	1	6
mitfa_w2	w2	mitfa	ENSDARG00000003732	15	0.410653	1	15577	532	41	2	0.0341529	0.0487805	0.00873672	1	6
mitfa_w2	w2	mitfa	ENSDARG00000003732	16	1	1	15577	674	41	0	0.0432689	0	0	1	6
mitfa_w2	w2	mitfa	ENSDARG00000003732	17	0.795224	1	15577	591	41	1	0.0379406	0.0243902	0.00125027	1	6
mitfa_w2	w2	mitfa	ENSDARG00000003732	18	0.366396	1	15577	485	41	2	0.0311356	0.0487805	0.00873672	1	6
mitfa_w2	w2	mitfa	ENSDARG00000003732	19	0.503894	1	15577	637	41	2	0.0408936	0.0487805	0.00873672	1	6
mitfa_w2	w2	mitfa	ENSDARG00000003732	20	1	1	15577	640	41	0	0.0410862	0	0	1	6
mitfa_w2	w2	mitfa	ENSDARG00000003732	21	0.0181854	0.454635	15577	585	41	5	0.0375554	0.121951	0.0493039	1	6
mitfa_w2	w2	mitfa	ENSDARG00000003732	22	0.765259	1	15577	541	41	1	0.0347307	0.0243902	0.00125027	1	6
mitfa_w2	w2	mitfa	ENSDARG00000003732	23	1	1	15577	608	41	0	0.0390319	0	0	1	6
mitfa_w2	w2	mitfa	ENSDARG00000003732	24	1	1	15577	446	41	0	0.028632	0	0	1	6
mitfa_w2	w2	mitfa	ENSDARG00000003732	25	1	1	15577	474	41	0	0.0304295	0	0	1	6
sox10_baz1	sox10_baz1	sox10	ENSDARG00000077467	1	0.693035	1	10267	466	78	3	0.0453881	0.0384615	0.0105639	1	3
sox10_baz1	sox10_baz1	sox10	ENSDARG00000077467	2	0.317282	1	10267	491	78	5	0.0478231	0.0641026	0.0255957	1	3
sox10_baz1	sox10_baz1	sox10	ENSDARG00000077467	3	0.05923	1	10267	554	78	8	0.0539593	0.102564	0.052066	1	3
sox10_baz1	sox10_baz1	sox10	ENSDARG00000077467	4	1	1	10267	336	78	0	0.0327262	0	0	1	3
sox10_baz1	sox10_baz1	sox10	ENSDARG00000077467	5	0.610993	1	10267	553	78	4	0.0538619	0.0512821	0.0177042	1	3
sox10_baz1	sox10_baz1	sox10	ENSDARG00000077467	6	0.291899	1	10267	474	78	5	0.0461673	0.0641026	0.0255957	1	3
sox10_baz1	sox10_baz1	sox10	ENSDARG00000077467	7	0.350552	1	10267	513	78	5	0.0499659	0.0641026	0.0255957	1	3
sox10_baz1	sox10_baz1	sox10	ENSDARG00000077467	8	1	1	10267	444	78	0	0.0432453	0	0	1	3
sox10_baz1	sox10_baz1	sox10	ENSDARG00000077467	9	0.942894	1	10267	370	78	1	0.0360378	0.0128205	0.00065739	1	3
sox10_baz1	sox10_baz1	sox10	ENSDARG00000077467	10	0.549476	1	10267	377	78	3	0.0367196	0.0384615	0.0105639	1	3
sox10_baz1	sox10_baz1	sox10	ENSDARG00000077467	11	0.947224	1	10267	380	78	1	0.0370118	0.0128205	0.00065739	1	3
sox10_baz1	sox10_baz1	sox10	ENSDARG00000077467	12	0.147023	1	10267	367	78	5	0.0357456	0.0641026	0.0255957	1	3
sox10_baz1	sox10_baz1	sox10	ENSDARG00000077467	13	0.962435	1	10267	423	78	1	0.0412	0.0128205	0.00065739	1	3
sox10_baz1	sox10_baz1	sox10	ENSDARG00000077467	14	1	1	10267	397	78	0	0.0386676	0	0	1	3
sox10_baz1	sox10_baz1	sox10	ENSDARG00000077467	15	0.489485	1	10267	345	78	3	0.0336028	0.0384615	0.0105639	1	3
sox10_baz1	sox10_baz1	sox10	ENSDARG00000077467	16	0.00739417	0.184854	10267	453	78	9	0.0441219	0.115385	0.0615314	1	3
sox10_baz1	sox10_baz1	sox10	ENSDARG00000077467	17	0.302821	1	10267	366	78	4	0.0356482	0.0512821	0.0177042	1	3
sox10_baz1	sox10_baz1	sox10	ENSDARG00000077467	18	0.921781	1	10267	330	78	1	0.0321418	0.0128205	0.00065739	1	3
sox10_baz1	sox10_baz1	sox10	ENSDARG00000077467	19	0.0195098	0.487746	10267	444	78	8	0.0432453	0.102564	0.052066	1	3
sox10_baz1	sox10_baz1	sox10	ENSDARG00000077467	20	0.65642	1	10267	441	78	3	0.0429532	0.0384615	0.0105639	1	3
sox10_baz1	sox10_baz1	sox10	ENSDARG00000077467	21	0.178973	1	10267	393	78	5	0.038278	0.0641026	0.0255957	1	3
sox10_baz1	sox10_baz1	sox10	ENSDARG00000077467	22	0.91801	1	10267	324	78	1	0.0315574	0.0128205	0.00065739	1	3
sox10_baz1	sox10_baz1	sox10	ENSDARG00000077467	23	0.962136	1	10267	422	78	1	0.0411026	0.0128205	0.00065739	1	3
sox10_baz1	sox10_baz1	sox10	ENSDARG00000077467	24	1	1	10267	313	78	0	0.030486	0	0	1	3
sox10_baz1	sox10_baz1	sox10	ENSDARG00000077467	25	0.652263	1	10267	291	78	2	0.0283432	0.025641	0.00457492	1	3
sox10_t3_1	sox10T3	sox10	ENSDARG00000077467	1	0.498357	1	14481	651	59	3	0.0449555	0.0508475	0.0140009	1	3
sox10_t3_1	sox10T3	sox10	ENSDARG00000077467	2	0.130872	1	14481	660	59	5	0.045577	0.0847458	0.0339872	1	3
sox10_t3_1	sox10T3	sox10	ENSDARG00000077467	3	4.2459e-05	0.00106148	14481	750	59	12	0.051792	0.20339	0.121764	1	3
sox10_t3_1	sox10T3	sox10	ENSDARG00000077467	4	0.193171	1	14481	559	59	4	0.0386023	0.0677966	0.0234876	1	3
sox10_t3_1	sox10T3	sox10	ENSDARG00000077467	5	0.86181	1	14481	836	59	2	0.0577308	0.0338983	0.00605639	1	3
sox10_t3_1	sox10T3	sox10	ENSDARG00000077467	6	0.934	1	14481	652	59	1	0.0450245	0.0169492	0.000869	1	3
sox10_t3_1	sox10T3	sox10	ENSDARG00000077467	7	0.952728	1	14481	730	59	1	0.0504109	0.0169492	0.000869	1	3
sox10_t3_1	sox10T3	sox10	ENSDARG00000077467	8	0.722218	1	14481	617	59	2	0.0426076	0.0338983	0.00605639	1	3
sox10_t3_1	sox10T3	sox10	ENSDARG00000077467	9	0.386115	1	14481	547	59	3	0.0377736	0.0508475	0.0140009	1	3
sox10_t3_1	sox10T3	sox10	ENSDARG00000077467	10	1	1	14481	503	59	0	0.0347352	0	0	1	3
sox10_t3_1	sox10T3	sox10	ENSDARG00000077467	11	0.360441	1	14481	524	59	3	0.0361853	0.0508475	0.0140009	1	3
sox10_t3_1	sox10T3	sox10	ENSDARG00000077467	12	0.382776	1	14481	544	59	3	0.0375665	0.0508475	0.0140009	1	3
sox10_t3_1	sox10T3	sox10	ENSDARG00000077467	13	1	1	14481	555	59	0	0.0383261	0	0	1	3
sox10_t3_1	sox10T3	sox10	ENSDARG00000077467	14	0.641832	1	14481	531	59	2	0.0366687	0.0338983	0.00605639	1	3
sox10_t3_1	sox10T3	sox10	ENSDARG00000077467	15	0.607694	1	14481	499	59	2	0.0344589	0.0338983	0.00605639	1	3
sox10_t3_1	sox10T3	sox10	ENSDARG00000077467	16	0.926891	1	14481	628	59	1	0.0433672	0.0169492	0.000869	1	3
sox10_t3_1	sox10T3	sox10	ENSDARG00000077467	17	1	1	14481	550	59	0	0.0379808	0	0	1	3
sox10_t3_1	sox10T3	sox10	ENSDARG00000077467	18	0.56054	1	14481	458	59	2	0.0316277	0.0338983	0.00605639	1	3
sox10_t3_1	sox10T3	sox10	ENSDARG00000077467	19	0.437824	1	14481	594	59	3	0.0410193	0.0508475	0.0140009	1	3
sox10_t3_1	sox10T3	sox10	ENSDARG00000077467	20	1	1	14481	601	59	0	0.0415027	0	0	1	3
sox10_t3_1	sox10T3	sox10	ENSDARG00000077467	21	0.0250351	0.625878	14481	554	59	6	0.038257	0.101695	0.0452226	1	3
sox10_t3_1	sox10T3	sox10	ENSDARG00000077467	22	0.634564	1	14481	524	59	2	0.0361853	0.0338983	0.00605639	1	3
sox10_t3_1	sox10T3	sox10	ENSDARG00000077467	23	1	1	14481	565	59	0	0.0390166	0	0	1	3
sox10_t3_1	sox10T3	sox10	ENSDARG00000077467	24	1	1	14481	415	59	0	0.0286582	0	0	1	3
sox10_t3_1	sox10T3	sox10	ENSDARG00000077467	25	0.531177	1	14481	434	59	2	0.0299703	0.0338983	0.00605639	1	3
sox10_t3_2	sox10T3	sox10	ENSDARG00000077467	1	0.489815	1	15643	699	103	5	0.0446845	0.0485437	0.0193199	1	3
sox10_t3_2	sox10T3	sox10	ENSDARG00000077467	2	0.194089	1	15643	717	103	7	0.0458352	0.0679612	0.0323283	1	3
sox10_t3_2	sox10T3	sox10	ENSDARG00000077467	3	0.00274114	0.0685284	15643	815	103	13	0.0521	0.126214	0.0762978	1	3
sox10_t3_2	sox10T3	sox10	ENSDARG00000077467	4	0.234476	1	15643	629	103	6	0.0402097	0.0582524	0.0256701	1	3
sox10_t3_2	sox10T3	sox10	ENSDARG00000077467	5	0.942876	1	15643	910	103	3	0.058173	0.0291262	0.00798484	1	3
sox10_t3_2	sox10T3	sox10	ENSDARG00000077467	6	0.677385	1	15643	696	103	4	0.0444927	0.038835	0.0133721	1	3
sox10_t3_2	sox10T3	sox10	ENSDARG00000077467	7	0.969924	1	15643	796	103	2	0.0508854	0.0194175	0.00346098	1	3
sox10_t3_2	sox10T3	sox10	ENSDARG00000077467	8	0.639718	1	15643	663	103	4	0.0423832	0.038835	0.0133721	1	3
sox10_t3_2	sox10T3	sox10	ENSDARG00000077467	9	0.757275	1	15643	597	103	3	0.038164	0.0291262	0.00798484	1	3
sox10_t3_2	sox10T3	sox10	ENSDARG00000077467	10	0.873715	1	15643	539	103	2	0.0344563	0.0194175	0.00346098	1	3
sox10_t3_2	sox10T3	sox10	ENSDARG00000077467	11	0.15906	1	15643	554	103	6	0.0354152	0.0582524	0.0256701	1	3
sox10_t3_2	sox10T3	sox10	ENSDARG00000077467	12	0.324734	1	15643	572	103	5	0.0365659	0.0485437	0.0193199	1	3
sox10_t3_2	sox10T3	sox10	ENSDARG00000077467	13	0.914366	1	15643	611	103	2	0.039059	0.0194175	0.00346098	1	3
sox10_t3_2	sox10T3	sox10	ENSDARG00000077467	14	0.314361	1	15643	564	103	5	0.0360545	0.0485437	0.0193199	1	3
sox10_t3_2	sox10T3	sox10	ENSDARG00000077467	15	0.703767	1	15643	548	103	3	0.0350316	0.0291262	0.00798484	1	3
sox10_t3_2	sox10T3	sox10	ENSDARG00000077467	16	1	1	15643	692	103	0	0.044237	0	0	1	3
sox10_t3_2	sox10T3	sox10	ENSDARG00000077467	17	0.541717	1	15643	586	103	4	0.0374608	0.038835	0.0133721	1	3
sox10_t3_2	sox10T3	sox10	ENSDARG00000077467	18	0.108193	1	15643	494	103	6	0.0315796	0.0582524	0.0256701	1	3
sox10_t3_2	sox10T3	sox10	ENSDARG00000077467	19	0.254095	1	15643	647	103	6	0.0413604	0.0582524	0.0256701	1	3
sox10_t3_2	sox10T3	sox10	ENSDARG00000077467	20	0.93133	1	15643	651	103	2	0.0416161	0.0194175	0.00346098	1	3
sox10_t3_2	sox10T3	sox10	ENSDARG00000077467	21	0.0159319	0.398297	15643	589	103	9	0.0376526	0.0873786	0.0463421	1	3
sox10_t3_2	sox10T3	sox10	ENSDARG00000077467	22	0.974772	1	15643	549	103	1	0.0350956	0.00970874	0.000497869	1	3
sox10_t3_2	sox10T3	sox10	ENSDARG00000077467	23	0.9153	1	15643	613	103	2	0.0391869	0.0194175	0.00346098	1	3
sox10_t3_2	sox10T3	sox10	ENSDARG00000077467	24	0.944868	1	15643	434	103	1	0.027744	0.00970874	0.000497869	1	3
sox10_t3_2	sox10T3	sox10	ENSDARG00000077467	25	0.826284	1	15643	478	103	2	0.0305568	0.0194175	0.00346098	1	3
sox10_t3_3	sox10T3	sox10	ENSDARG00000077467	1	0.115987	1	15480	697	126	9	0.0450258	0.0714286	0.0377665	1	3
sox10_t3_3	sox10T3	sox10	ENSDARG00000077467	2	0.354728	1	15480	708	126	7	0.0457364	0.0555556	0.0263612	1	3
sox10_t3_3	sox10T3	sox10	ENSDARG00000077467	3	0.00625878	0.156469	15480	808	126	14	0.0521964	0.111111	0.0684366	1	3
sox10_t3_3	sox10T3	sox10	ENSDARG00000077467	4	0.689611	1	15480	573	126	4	0.0370155	0.031746	0.010915	1	3
sox10_t3_3	sox10T3	sox10	ENSDARG00000077467	5	0.979266	1	15480	898	126	3	0.0580103	0.0238095	0.00652035	1	3
sox10_t3_3	sox10T3	sox10	ENSDARG00000077467	6	0.508734	1	15480	701	126	6	0.0452842	0.047619	0.0209385	1	3
sox10_t3_3	sox10T3	sox10	ENSDARG00000077467	7	0.960984	1	15480	800	126	3	0.0516796	0.0238095	0.00652035	1	3
sox10_t3_3	sox10T3	sox10	ENSDARG00000077467	8	0.631037	1	15480	663	126	5	0.0428295	0.0396825	0.0157641	1	3
sox10_t3_3	sox10T3	sox10	ENSDARG00000077467	9	0.865081	1	15480	593	126	3	0.0383075	0.0238095	0.00652035	1	3
sox10_t3_3	sox10T3	sox10	ENSDARG00000077467	10	0.988787	1	15480	542	126	1	0.0350129	0.00793651	0.000407007	1	3
sox10_t3_3	sox10T3	sox10	ENSDARG00000077467	11	0.305599	1	15480	560	126	6	0.0361757	0.047619	0.0209385	1	3
sox10_t3_3	sox10T3	sox10	ENSDARG00000077467	12	0.493297	1	15480	568	126	5	0.0366925	0.0396825	0.0157641	1	3
sox10_t3_3	sox10T3	sox10	ENSDARG00000077467	13	0.95552	1	15480	591	126	2	0.0381783	0.015873	0.00282759	1	3
sox10_t3_3	sox10T3	sox10	ENSDARG00000077467	14	0.482395	1	15480	561	126	5	0.0362403	0.0396825	0.0157641	1	3
sox10_t3_3	sox10T3	sox10	ENSDARG00000077467	15	0.651238	1	15480	545	126	4	0.0352067	0.031746	0.010915	1	3
sox10_t3_3	sox10T3	sox10	ENSDARG00000077467	16	0.820991	1	15480	694	126	4	0.044832	0.031746	0.010915	1	3
sox10_t3_3	sox10T3	sox10	ENSDARG00000077467	17	0.70892	1	15480	588	126	4	0.0379845	0.031746	0.010915	1	3
sox10_t3_3	sox10T3	sox10	ENSDARG00000077467	18	0.0196092	0.490229	15480	492	126	9	0.0317829	0.0714286	0.0377665	1	3
sox10_t3_3	sox10T3	sox10	ENSDARG00000077467	19	0.26268	1	15480	637	126	7	0.0411499	0.0555556	0.0263612	1	3
sox10_t3_3	sox10T3	sox10	ENSDARG00000077467	20	0.763784	1	15480	635	126	4	0.0410207	0.031746	0.010915	1	3
sox10_t3_3	sox10T3	sox10	ENSDARG00000077467	21	0.199375	1	15480	584	126	7	0.0377261	0.0555556	0.0263612	1	3
sox10_t3_3	sox10T3	sox10	ENSDARG00000077467	22	0.149223	1	15480	537	126	7	0.0346899	0.0555556	0.0263612	1	3
sox10_t3_3	sox10T3	sox10	ENSDARG00000077467	23	0.8703	1	15480	600	126	3	0.0387597	0.0238095	0.00652035	1	3
sox10_t3_3	sox10T3	sox10	ENSDARG00000077467	24	0.973571	1	15480	440	126	1	0.0284238	0.00793651	0.000407007	1	3
sox10_t3_3	sox10T3	sox10	ENSDARG00000077467	25	0.733074	1	15480	465	126	3	0.0300388	0.0238095	0.00652035	1	3
sox10_t3_4	sox10T3	sox10	ENSDARG00000077467	1	0.634169	1	14475	655	1444	63	0.0452504	0.0436288	0.0351389	1	3
sox10_t3_4	sox10T3	sox10	ENSDARG00000077467	2	0.842972	1	14475	688	1444	61	0.0475302	0.0422438	0.0338913	1	3
sox10_t3_4	sox10T3	sox10	ENSDARG00000077467	3	0.00121151	0.0302877	14475	767	1444	104	0.0529879	0.0720222	0.0611396	1	3
sox10_t3_4	sox10T3	sox10	ENSDARG00000077467	4	0.0608735	1	14475	488	1444	60	0.0337133	0.0415512	0.0332684	1	3
sox10_t3_4	sox10T3	sox10	ENSDARG00000077467	5	0.744457	1	14475	805	1444	75	0.0556131	0.0519391	0.0426726	1	3
sox10_t3_4	sox10T3	sox10	ENSDARG00000077467	6	0.325908	1	14475	662	1444	70	0.045734	0.0484765	0.0395242	1	3
sox10_t3_4	sox10T3	sox10	ENSDARG00000077467	7	0.675704	1	14475	736	1444	70	0.0508463	0.0484765	0.0395242	1	3
sox10_t3_4	sox10T3	sox10	ENSDARG00000077467	8	0.978578	1	14475	617	1444	47	0.0426252	0.0325485	0.0252375	1	3
sox10_t3_4	sox10T3	sox10	ENSDARG00000077467	9	0.996307	1	14475	539	1444	36	0.0372366	0.0249307	0.0185653	1	3
sox10_t3_4	sox10T3	sox10	ENSDARG00000077467	10	0.977071	1	14475	523	1444	39	0.0361313	0.0270083	0.0203711	1	3
sox10_t3_4	sox10T3	sox10	ENSDARG00000077467	11	0.379246	1	14475	516	1444	54	0.0356477	0.0373961	0.0295456	1	3
sox10_t3_4	sox10T3	sox10	ENSDARG00000077467	12	0.298483	1	14475	520	1444	56	0.035924	0.0387812	0.0307837	1	3
sox10_t3_4	sox10T3	sox10	ENSDARG00000077467	13	0.743797	1	14475	555	1444	51	0.038342	0.0353186	0.0276942	1	3
sox10_t3_4	sox10T3	sox10	ENSDARG00000077467	14	0.115828	1	14475	521	1444	61	0.0359931	0.0422438	0.0338913	1	3
sox10_t3_4	sox10T3	sox10	ENSDARG00000077467	15	0.784196	1	14475	512	1444	46	0.0353713	0.031856	0.0246256	1	3
sox10_t3_4	sox10T3	sox10	ENSDARG00000077467	16	0.744082	1	14475	649	1444	60	0.0448359	0.0415512	0.0332684	1	3
sox10_t3_4	sox10T3	sox10	ENSDARG00000077467	17	0.687009	1	14475	553	1444	52	0.0382038	0.0360111	0.0283105	1	3
sox10_t3_4	sox10T3	sox10	ENSDARG00000077467	18	0.901252	1	14475	472	1444	39	0.0326079	0.0270083	0.0203711	1	3
sox10_t3_4	sox10T3	sox10	ENSDARG00000077467	19	0.0534933	1	14475	611	1444	74	0.0422107	0.0512465	0.0420419	1	3
sox10_t3_4	sox10T3	sox10	ENSDARG00000077467	20	0.438281	1	14475	626	1444	64	0.043247	0.0443213	0.0357636	1	3
sox10_t3_4	sox10T3	sox10	ENSDARG00000077467	21	0.0211571	0.528929	14475	536	1444	69	0.0370294	0.0477839	0.0388961	1	3
sox10_t3_4	sox10T3	sox10	ENSDARG00000077467	22	0.605889	1	14475	486	1444	47	0.0335751	0.0325485	0.0252375	1	3
sox10_t3_4	sox10T3	sox10	ENSDARG00000077467	23	0.213893	1	14475	578	1444	64	0.0399309	0.0443213	0.0357636	1	3
sox10_t3_4	sox10T3	sox10	ENSDARG00000077467	24	0.446533	1	14475	419	1444	43	0.0289465	0.0297784	0.0227958	1	3
sox10_t3_4	sox10T3	sox10	ENSDARG00000077467	25	0.797982	1	14475	441	1444	39	0.0304663	0.0270083	0.0203711	1	3
sox10_t3_baz1_28hpf	sox10_baz1 X sox10_t3	sox10	ENSDARG00000077467	1	0.0747466	1	13551	619	147	11	0.0456793	0.0748299	0.0425292	1	3
sox10_t3_baz1_28hpf	sox10_baz1 X sox10_t3	sox10	ENSDARG00000077467	2	0.230763	1	13551	619	147	9	0.0456793	0.0612245	0.0323082	1	3
sox10_t3_baz1_28hpf	sox10_baz1 X sox10_t3	sox10	ENSDARG00000077467	3	0.000289817	0.00724544	13551	715	147	19	0.0527636	0.129252	0.0863197	1	3
sox10_t3_baz1_28hpf	sox10_baz1 X sox10_t3	sox10	ENSDARG00000077467	4	0.322842	1	13551	513	147	7	0.037857	0.047619	0.0225594	1	3
sox10_t3_baz1_28hpf	sox10_baz1 X sox10_t3	sox10	ENSDARG00000077467	5	0.635113	1	13551	794	147	8	0.0585935	0.0544218	0.0273646	1	3
sox10_t3_baz1_28hpf	sox10_baz1 X sox10_t3	sox10	ENSDARG00000077467	6	0.315551	1	13551	593	147	8	0.0437606	0.0544218	0.0273646	1	3
sox10_t3_baz1_28hpf	sox10_baz1 X sox10_t3	sox10	ENSDARG00000077467	7	0.747968	1	13551	677	147	6	0.0499594	0.0408163	0.0179223	1	3
sox10_t3_baz1_28hpf	sox10_baz1 X sox10_t3	sox10	ENSDARG00000077467	8	0.869926	1	13551	570	147	4	0.0420633	0.0272109	0.0093469	1	3
sox10_t3_baz1_28hpf	sox10_baz1 X sox10_t3	sox10	ENSDARG00000077467	9	0.996601	1	13551	514	147	1	0.0379308	0.00680272	0.000348873	1	3
sox10_t3_baz1_28hpf	sox10_baz1 X sox10_t3	sox10	ENSDARG00000077467	10	0.994845	1	13551	477	147	1	0.0352004	0.00680272	0.000348873	1	3
sox10_t3_baz1_28hpf	sox10_baz1 X sox10_t3	sox10	ENSDARG00000077467	11	0.141369	1	13551	471	147	8	0.0347576	0.0544218	0.0273646	1	3
sox10_t3_baz1_28hpf	sox10_baz1 X sox10_t3	sox10	ENSDARG00000077467	12	0.907382	1	13551	495	147	3	0.0365287	0.0204082	0.00558508	1	3
sox10_t3_baz1_28hpf	sox10_baz1 X sox10_t3	sox10	ENSDARG00000077467	13	0.935675	1	13551	541	147	3	0.0399233	0.0204082	0.00558508	1	3
sox10_t3_baz1_28hpf	sox10_baz1 X sox10_t3	sox10	ENSDARG00000077467	14	0.916999	1	13551	509	147	3	0.0375618	0.0204082	0.00558508	1	3
sox10_t3_baz1_28hpf	sox10_baz1 X sox10_t3	sox10	ENSDARG00000077467	15	0.882455	1	13551	464	147	3	0.034241	0.0204082	0.00558508	1	3
sox10_t3_baz1_28hpf	sox10_baz1 X sox10_t3	sox10	ENSDARG00000077467	16	0.769876	1	13551	589	147	5	0.0434654	0.0340136	0.0134962	1	3
sox10_t3_baz1_28hpf	sox10_baz1 X sox10_t3	sox10	ENSDARG00000077467	17	0.809772	1	13551	512	147	4	0.0377832	0.0272109	0.0093469	1	3
sox10_t3_baz1_28hpf	sox10_baz1 X sox10_t3	sox10	ENSDARG00000077467	18	0.189136	1	13551	431	147	7	0.0318058	0.047619	0.0225594	1	3
sox10_t3_baz1_28hpf	sox10_baz1 X sox10_t3	sox10	ENSDARG00000077467	19	0.16204	1	13551	565	147	9	0.0416943	0.0612245	0.0323082	1	3
sox10_t3_baz1_28hpf	sox10_baz1 X sox10_t3	sox10	ENSDARG00000077467	20	0.736242	1	13551	564	147	5	0.0416205	0.0340136	0.0134962	1	3
sox10_t3_baz1_28hpf	sox10_baz1 X sox10_t3	sox10	ENSDARG00000077467	21	0.0519792	1	13551	510	147	10	0.0376356	0.0680272	0.0373685	1	3
sox10_t3_baz1_28hpf	sox10_baz1 X sox10_t3	sox10	ENSDARG00000077467	22	0.962938	1	13551	464	147	2	0.034241	0.0136054	0.00242275	1	3
sox10_t3_baz1_28hpf	sox10_baz1 X sox10_t3	sox10	ENSDARG00000077467	23	0.543158	1	13551	545	147	6	0.0402184	0.0408163	0.0179223	1	3
sox10_t3_baz1_28hpf	sox10_baz1 X sox10_t3	sox10	ENSDARG00000077467	24	0.786394	1	13551	382	147	3	0.0281898	0.0204082	0.00558508	1	3
sox10_t3_baz1_28hpf	sox10_baz1 X sox10_t3	sox10	ENSDARG00000077467	25	0.94325	1	13551	418	147	2	0.0308464	0.0136054	0.00242275	1	3
sox10_t3_baz1_36hpf	sox10_baz1 X sox10_t3	sox10	ENSDARG00000077467	1	0.321997	1	8811	408	301	16	0.0463058	0.0531561	0.0336225	1	3
sox10_t3_baz1_36hpf	sox10_baz1 X sox10_t3	sox10	ENSDARG00000077467	2	0.0115119	0.287797	8811	424	301	24	0.0481217	0.0797342	0.0555867	1	3
sox10_t3_baz1_36hpf	sox10_baz1 X sox10_t3	sox10	ENSDARG00000077467	3	0.00020868	0.00521699	8811	494	301	33	0.0560663	0.109635	0.0813291	1	3
sox10_t3_baz1_36hpf	sox10_baz1 X sox10_t3	sox10	ENSDARG00000077467	4	0.992556	1	8811	302	301	4	0.0342753	0.013289	0.00455165	1	3
sox10_t3_baz1_36hpf	sox10_baz1 X sox10_t3	sox10	ENSDARG00000077467	5	0.931883	1	8811	507	301	12	0.0575417	0.0398671	0.0231622	1	3
sox10_t3_baz1_36hpf	sox10_baz1 X sox10_t3	sox10	ENSDARG00000077467	6	0.356587	1	8811	390	301	15	0.0442629	0.0498339	0.0309659	1	3
sox10_t3_baz1_36hpf	sox10_baz1 X sox10_t3	sox10	ENSDARG00000077467	7	0.978704	1	8811	425	301	8	0.0482352	0.0265781	0.0132924	1	3
sox10_t3_baz1_36hpf	sox10_baz1 X sox10_t3	sox10	ENSDARG00000077467	8	0.60561	1	8811	368	301	12	0.041766	0.0398671	0.0231622	1	3
sox10_t3_baz1_36hpf	sox10_baz1 X sox10_t3	sox10	ENSDARG00000077467	9	0.482858	1	8811	337	301	12	0.0382476	0.0398671	0.0231622	1	3
sox10_t3_baz1_36hpf	sox10_baz1 X sox10_t3	sox10	ENSDARG00000077467	10	0.961848	1	8811	318	301	6	0.0360912	0.0199336	0.00871581	1	3
sox10_t3_baz1_36hpf	sox10_baz1 X sox10_t3	sox10	ENSDARG00000077467	11	0.546501	1	8811	323	301	11	0.0366587	0.0365449	0.0206273	1	3
sox10_t3_baz1_36hpf	sox10_baz1 X sox10_t3	sox10	ENSDARG00000077467	12	0.988031	1	8811	328	301	5	0.0372262	0.0166113	0.00656757	1	3
sox10_t3_baz1_36hpf	sox10_baz1 X sox10_t3	sox10	ENSDARG00000077467	13	0.922963	1	8811	357	301	8	0.0405175	0.0265781	0.0132924	1	3
sox10_t3_baz1_36hpf	sox10_baz1 X sox10_t3	sox10	ENSDARG00000077467	14	0.77298	1	8811	322	301	9	0.0365452	0.0299003	0.0156854	1	3
sox10_t3_baz1_36hpf	sox10_baz1 X sox10_t3	sox10	ENSDARG00000077467	15	0.713112	1	8811	272	301	8	0.0308705	0.0265781	0.0132924	1	3
sox10_t3_baz1_36hpf	sox10_baz1 X sox10_t3	sox10	ENSDARG00000077467	16	0.176014	1	8811	387	301	17	0.0439224	0.0564784	0.0363027	1	3
sox10_t3_baz1_36hpf	sox10_baz1 X sox10_t3	sox10	ENSDARG00000077467	17	0.167061	1	8811	306	301	14	0.0347293	0.0465116	0.0283351	1	3
sox10_t3_baz1_36hpf	sox10_baz1 X sox10_t3	sox10	ENSDARG00000077467	18	0.435532	1	8811	297	301	11	0.0337079	0.0365449	0.0206273	1	3
sox10_t3_baz1_36hpf	sox10_baz1 X sox10_t3	sox10	ENSDARG00000077467	19	0.363869	1	8811	392	301	15	0.0444898	0.0498339	0.0309659	1	3
sox10_t3_baz1_36hpf	sox10_baz1 X sox10_t3	sox10	ENSDARG00000077467	20	0.60561	1	8811	368	301	12	0.041766	0.0398671	0.0231622	1	3
sox10_t3_baz1_36hpf	sox10_baz1 X sox10_t3	sox10	ENSDARG00000077467	21	0.261808	1	8811	336	301	14	0.0381342	0.0465116	0.0283351	1	3
sox10_t3_baz1_36hpf	sox10_baz1 X sox10_t3	sox10	ENSDARG00000077467	22	0.825583	1	8811	273	301	7	0.030984	0.0232558	0.0109643	1	3
sox10_t3_baz1_36hpf	sox10_baz1 X sox10_t3	sox10	ENSDARG00000077467	23	0.905931	1	8811	381	301	9	0.0432414	0.0299003	0.0156854	1	3
sox10_t3_baz1_36hpf	sox10_baz1 X sox10_t3	sox10	ENSDARG00000077467	24	0.599904	1	8811	245	301	8	0.0278062	0.0265781	0.0132924	1	3
sox10_t3_baz1_36hpf	sox10_baz1 X sox10_t3	sox10	ENSDARG00000077467	25	0.242603	1	8811	251	301	11	0.0284871	0.0365449	0.0206273	1	3
tcf7l1a_m881	tcf7l1a	tcf7l1a	ENSDARG00000038159	1	0.84379	1	9528	412	42	1	0.043241	0.0238095	0.00122052	1	10
tcf7l1a_m881	tcf7l1a	tcf7l1a	ENSDARG00000038159	2	0.863987	1	9528	442	42	1	0.0463896	0.0238095	0.00122052	1	10
tcf7l1a_m881	tcf7l1a	tcf7l1a	ENSDARG00000038159	3	0.911708	1	9528	535	42	1	0.0561503	0.0238095	0.00122052	1	10
tcf7l1a_m881	tcf7l1a	tcf7l1a	ENSDARG00000038159	4	0.626008	1	9528	475	42	2	0.0498531	0.047619	0.00852706	1	10
tcf7l1a_m881	tcf7l1a	tcf7l1a	ENSDARG00000038159	5	0.921082	1	9528	559	42	1	0.0586692	0.0238095	0.00122052	1	10
tcf7l1a_m881	tcf7l1a	tcf7l1a	ENSDARG00000038159	6	1	1	9528	405	42	0	0.0425063	0	0	1	10
tcf7l1a_m881	tcf7l1a	tcf7l1a	ENSDARG00000038159	7	0.666211	1	9528	511	42	2	0.0536314	0.047619	0.00852706	1	10
tcf7l1a_m881	tcf7l1a	tcf7l1a	ENSDARG00000038159	8	0.242668	1	9528	387	42	3	0.0406171	0.0714286	0.0197508	1	10
tcf7l1a_m881	tcf7l1a	tcf7l1a	ENSDARG00000038159	9	0.746147	1	9528	306	42	1	0.0321159	0.0238095	0.00122052	1	10
tcf7l1a_m881	tcf7l1a	tcf7l1a	ENSDARG00000038159	10	0.000100372	0.00250931	9528	338	42	8	0.0354744	0.190476	0.0984713	1	10
tcf7l1a_m881	tcf7l1a	tcf7l1a	ENSDARG00000038159	11	0.77556	1	9528	333	42	1	0.0349496	0.0238095	0.00122052	1	10
tcf7l1a_m881	tcf7l1a	tcf7l1a	ENSDARG00000038159	12	0.420397	1	9528	324	42	2	0.034005	0.047619	0.00852706	1	10
tcf7l1a_m881	tcf7l1a	tcf7l1a	ENSDARG00000038159	13	0.0817286	1	9528	374	42	4	0.0392527	0.0952381	0.0331894	1	10
tcf7l1a_m881	tcf7l1a	tcf7l1a	ENSDARG00000038159	14	0.477416	1	9528	362	42	2	0.0379933	0.047619	0.00852706	1	10
tcf7l1a_m881	tcf7l1a	tcf7l1a	ENSDARG00000038159	15	0.160153	1	9528	314	42	3	0.0329555	0.0714286	0.0197508	1	10
tcf7l1a_m881	tcf7l1a	tcf7l1a	ENSDARG00000038159	16	0.832623	1	9528	397	42	1	0.0416667	0.0238095	0.00122052	1	10
tcf7l1a_m881	tcf7l1a	tcf7l1a	ENSDARG00000038159	17	1	1	9528	330	42	0	0.0346348	0	0	1	10
tcf7l1a_m881	tcf7l1a	tcf7l1a	ENSDARG00000038159	18	1	1	9528	303	42	0	0.031801	0	0	1	10
tcf7l1a_m881	tcf7l1a	tcf7l1a	ENSDARG00000038159	19	0.552587	1	9528	416	42	2	0.0436608	0.047619	0.00852706	1	10
tcf7l1a_m881	tcf7l1a	tcf7l1a	ENSDARG00000038159	20	0.832623	1	9528	397	42	1	0.0416667	0.0238095	0.00122052	1	10
tcf7l1a_m881	tcf7l1a	tcf7l1a	ENSDARG00000038159	21	0.811391	1	9528	371	42	1	0.0389379	0.0238095	0.00122052	1	10
tcf7l1a_m881	tcf7l1a	tcf7l1a	ENSDARG00000038159	22	0.0192075	0.480187	9528	354	42	5	0.0371537	0.119048	0.0480994	1	10
tcf7l1a_m881	tcf7l1a	tcf7l1a	ENSDARG00000038159	23	1	1	9528	360	42	0	0.0377834	0	0	1	10
tcf7l1a_m881	tcf7l1a	tcf7l1a	ENSDARG00000038159	24	1	1	9528	244	42	0	0.0256087	0	0	1	10
tcf7l1a_m881	tcf7l1a	tcf7l1a	ENSDARG00000038159	25	1	1	9528	279	42	0	0.0292821	0	0	1	10
zmp_ph1	sa875	cep192	ENSDARG00000104831	1	0.444283	1	15116	701	326	16	0.0463747	0.0490798	0.0310239	1	16
zmp_ph1	sa875	cep192	ENSDARG00000104831	2	0.502795	1	15116	727	326	16	0.0480947	0.0490798	0.0310239	1	16
zmp_ph1	sa875	cep192	ENSDARG00000104831	3	0.43967	1	15116	790	326	18	0.0522625	0.0552147	0.0359878	1	16
zmp_ph1	sa875	cep192	ENSDARG00000104831	4	0.746412	1	15116	497	326	9	0.0328791	0.0276074	0.0144763	1	16
zmp_ph1	sa875	cep192	ENSDARG00000104831	5	0.290326	1	15116	849	326	21	0.0561657	0.0644172	0.0435676	1	16
zmp_ph1	sa875	cep192	ENSDARG00000104831	6	0.640209	1	15116	695	326	14	0.0459778	0.0429448	0.0261466	1	16
zmp_ph1	sa875	cep192	ENSDARG00000104831	7	0.723398	1	15116	787	326	15	0.052064	0.0460123	0.0285734	1	16
zmp_ph1	sa875	cep192	ENSDARG00000104831	8	0.815085	1	15116	639	326	11	0.0422731	0.0337423	0.019036	1	16
zmp_ph1	sa875	cep192	ENSDARG00000104831	9	0.801123	1	15116	578	326	10	0.0382376	0.0306748	0.0167347	1	16
zmp_ph1	sa875	cep192	ENSDARG00000104831	10	0.831502	1	15116	544	326	9	0.0359884	0.0276074	0.0144763	1	16
zmp_ph1	sa875	cep192	ENSDARG00000104831	11	0.118772	1	15116	534	326	16	0.0353268	0.0490798	0.0310239	1	16
zmp_ph1	sa875	cep192	ENSDARG00000104831	12	0.020747	0.518675	15116	561	326	20	0.037113	0.0613497	0.0410249	1	16
zmp_ph1	sa875	cep192	ENSDARG00000104831	13	0.987876	1	15116	587	326	6	0.038833	0.0184049	0.00804494	1	16
zmp_ph1	sa875	cep192	ENSDARG00000104831	14	0.496173	1	15116	539	326	12	0.0356576	0.0368098	0.0213746	1	16
zmp_ph1	sa875	cep192	ENSDARG00000104831	15	0.818789	1	15116	536	326	9	0.0354591	0.0276074	0.0144763	1	16
zmp_ph1	sa875	cep192	ENSDARG00000104831	16	0.00992434	0.248108	15116	662	326	24	0.0437947	0.0736196	0.0512798	1	16
zmp_ph1	sa875	cep192	ENSDARG00000104831	17	0.695754	1	15116	574	326	11	0.037973	0.0337423	0.019036	1	16
zmp_ph1	sa875	cep192	ENSDARG00000104831	18	0.475211	1	15116	485	326	11	0.0320852	0.0337423	0.019036	1	16
zmp_ph1	sa875	cep192	ENSDARG00000104831	19	0.708648	1	15116	630	326	12	0.0416777	0.0368098	0.0213746	1	16
zmp_ph1	sa875	cep192	ENSDARG00000104831	20	0.927675	1	15116	629	326	9	0.0416115	0.0276074	0.0144763	1	16
zmp_ph1	sa875	cep192	ENSDARG00000104831	21	0.241719	1	15116	565	326	15	0.0373776	0.0460123	0.0285734	1	16
zmp_ph1	sa875	cep192	ENSDARG00000104831	22	0.188082	1	15116	496	326	14	0.0328129	0.0429448	0.0261466	1	16
zmp_ph1	sa875	cep192	ENSDARG00000104831	23	0.844074	1	15116	606	326	10	0.04009	0.0306748	0.0167347	1	16
zmp_ph1	sa875	cep192	ENSDARG00000104831	24	0.850996	1	15116	448	326	7	0.0296375	0.0214724	0.01012	1	16
zmp_ph1	sa875	cep192	ENSDARG00000104831	25	0.398651	1	15116	457	326	11	0.0302329	0.0337423	0.019036	1	16
zmp_ph2	sa1577	slc2a11b	ENSDARG00000063288	1	1	1	14717	678	22	0	0.0460692	0	0	1	5
zmp_ph2	sa1577	slc2a11b	ENSDARG00000063288	2	0.659324	1	14717	703	22	1	0.0477679	0.0454545	0.0023288	1	5
zmp_ph2	sa1577	slc2a11b	ENSDARG00000063288	3	1	1	14717	763	22	0	0.0518448	0	0	1	5
zmp_ph2	sa1577	slc2a11b	ENSDARG00000063288	4	0.0330919	0.827298	14717	477	22	3	0.0324115	0.136364	0.0382235	1	5
zmp_ph2	sa1577	slc2a11b	ENSDARG00000063288	5	7.41476e-09	1.85369e-07	14717	832	22	11	0.0565333	0.5	0.311264	1	5
zmp_ph2	sa1577	slc2a11b	ENSDARG00000063288	6	1	1	14717	684	22	0	0.0464769	0	0	1	5
zmp_ph2	sa1577	slc2a11b	ENSDARG00000063288	7	0.690986	1	14717	765	22	1	0.0519807	0.0454545	0.0023288	1	5
zmp_ph2	sa1577	slc2a11b	ENSDARG00000063288	8	1	1	14717	618	22	0	0.0419923	0	0	1	5
zmp_ph2	sa1577	slc2a11b	ENSDARG00000063288	9	1	1	14717	538	22	0	0.0365564	0	0	1	5
zmp_ph2	sa1577	slc2a11b	ENSDARG00000063288	10	1	1	14717	535	22	0	0.0363525	0	0	1	5
zmp_ph2	sa1577	slc2a11b	ENSDARG00000063288	11	0.544677	1	14717	517	22	1	0.0351294	0.0454545	0.0023288	1	5
zmp_ph2	sa1577	slc2a11b	ENSDARG00000063288	12	0.569408	1	14717	553	22	1	0.0375756	0.0454545	0.0023288	1	5
zmp_ph2	sa1577	slc2a11b	ENSDARG00000063288	13	1	1	14717	575	22	0	0.0390705	0	0	1	5
zmp_ph2	sa1577	slc2a11b	ENSDARG00000063288	14	0.555832	1	14717	533	22	1	0.0362166	0.0454545	0.0023288	1	5
zmp_ph2	sa1577	slc2a11b	ENSDARG00000063288	15	1	1	14717	519	22	0	0.0352653	0	0	1	5
zmp_ph2	sa1577	slc2a11b	ENSDARG00000063288	16	0.631557	1	14717	653	22	1	0.0443705	0.0454545	0.0023288	1	5
zmp_ph2	sa1577	slc2a11b	ENSDARG00000063288	17	1	1	14717	561	22	0	0.0381192	0	0	1	5
zmp_ph2	sa1577	slc2a11b	ENSDARG00000063288	18	1	1	14717	475	22	0	0.0322756	0	0	1	5
zmp_ph2	sa1577	slc2a11b	ENSDARG00000063288	19	1	1	14717	617	22	0	0.0419243	0	0	1	5
zmp_ph2	sa1577	slc2a11b	ENSDARG00000063288	20	1	1	14717	612	22	0	0.0415846	0	0	1	5
zmp_ph2	sa1577	slc2a11b	ENSDARG00000063288	21	0.570076	1	14717	554	22	1	0.0376435	0.0454545	0.0023288	1	5
zmp_ph2	sa1577	slc2a11b	ENSDARG00000063288	22	1	1	14717	486	22	0	0.033023	0	0	1	5
zmp_ph2	sa1577	slc2a11b	ENSDARG00000063288	23	1	1	14717	583	22	0	0.0396141	0	0	1	5
zmp_ph2	sa1577	slc2a11b	ENSDARG00000063288	24	1	1	14717	435	22	0	0.0295577	0	0	1	5
zmp_ph2	sa1577	slc2a11b	ENSDARG00000063288	25	0.495775	1	14717	451	22	1	0.0306448	0.0454545	0.0023288	1	5
zmp_ph3	sa1343	bmp7a	ENSDARG00000018260	1	0.399194	1	13445	562	654	29	0.0417999	0.0443425	0.0319004	1	11
zmp_ph3	sa1343	bmp7a	ENSDARG00000018260	2	0.40518	1	13445	624	654	32	0.0464113	0.0489297	0.0358364	1	11
zmp_ph3	sa1343	bmp7a	ENSDARG00000018260	3	0.918229	1	13445	728	654	28	0.0541465	0.0428135	0.0305968	1	11
zmp_ph3	sa1343	bmp7a	ENSDARG00000018260	4	0.744223	1	13445	684	654	30	0.0508739	0.0458716	0.0332083	1	11
zmp_ph3	sa1343	bmp7a	ENSDARG00000018260	5	0.202043	1	13445	792	654	44	0.0589067	0.0672783	0.0518838	1	11
zmp_ph3	sa1343	bmp7a	ENSDARG00000018260	6	0.46256	1	13445	579	654	29	0.0430643	0.0443425	0.0319004	1	11
zmp_ph3	sa1343	bmp7a	ENSDARG00000018260	7	0.935659	1	13445	697	654	26	0.0518408	0.0397554	0.0280036	1	11
zmp_ph3	sa1343	bmp7a	ENSDARG00000018260	8	0.829493	1	13445	563	654	23	0.0418743	0.0351682	0.0241528	1	11
zmp_ph3	sa1343	bmp7a	ENSDARG00000018260	9	0.361247	1	13445	492	654	26	0.0365935	0.0397554	0.0280036	1	11
zmp_ph3	sa1343	bmp7a	ENSDARG00000018260	10	0.0917289	1	13445	457	654	29	0.0339903	0.0443425	0.0319004	1	11
zmp_ph3	sa1343	bmp7a	ENSDARG00000018260	11	0.079662	1	13445	450	654	29	0.0334697	0.0443425	0.0319004	1	11
zmp_ph3	sa1343	bmp7a	ENSDARG00000018260	12	0.529894	1	13445	473	654	23	0.0351804	0.0351682	0.0241528	1	11
zmp_ph3	sa1343	bmp7a	ENSDARG00000018260	13	0.717086	1	13445	523	654	23	0.0388992	0.0351682	0.0241528	1	11
zmp_ph3	sa1343	bmp7a	ENSDARG00000018260	14	0.174531	1	13445	475	654	28	0.0353291	0.0428135	0.0305968	1	11
zmp_ph3	sa1343	bmp7a	ENSDARG00000018260	15	0.327072	1	13445	483	654	26	0.0359241	0.0397554	0.0280036	1	11
zmp_ph3	sa1343	bmp7a	ENSDARG00000018260	16	0.466296	1	13445	580	654	29	0.0431387	0.0443425	0.0319004	1	11
zmp_ph3	sa1343	bmp7a	ENSDARG00000018260	17	0.502804	1	13445	487	654	24	0.0362216	0.0366972	0.0254308	1	11
zmp_ph3	sa1343	bmp7a	ENSDARG00000018260	18	0.448967	1	13445	413	654	21	0.0307177	0.0321101	0.0216155	1	11
zmp_ph3	sa1343	bmp7a	ENSDARG00000018260	19	0.867612	1	13445	558	654	22	0.0415024	0.0336391	0.0228809	1	11
zmp_ph3	sa1343	bmp7a	ENSDARG00000018260	20	0.693295	1	13445	559	654	25	0.0415768	0.0382263	0.0267145	1	11
zmp_ph3	sa1343	bmp7a	ENSDARG00000018260	21	0.89502	1	13445	480	654	18	0.035701	0.0275229	0.0178632	1	11
zmp_ph3	sa1343	bmp7a	ENSDARG00000018260	22	0.969073	1	13445	495	654	16	0.0368167	0.0244648	0.0154043	1	11
zmp_ph3	sa1343	bmp7a	ENSDARG00000018260	23	0.0169502	0.423756	13445	507	654	36	0.0377092	0.0550459	0.0411367	1	11
zmp_ph3	sa1343	bmp7a	ENSDARG00000018260	24	0.716465	1	13445	370	654	16	0.0275195	0.0244648	0.0154043	1	11
zmp_ph3	sa1343	bmp7a	ENSDARG00000018260	25	0.366856	1	13445	414	654	22	0.0307921	0.0336391	0.0228809	1	11
zmp_ph4	sa1376	polr1a	ENSDARG00000098375	1	0.945539	1	12904	563	1283	45	0.0436299	0.035074	0.0270395	1	14
zmp_ph4	sa1376	polr1a	ENSDARG00000098375	2	0.391608	1	12904	609	1283	63	0.0471947	0.0491037	0.0395686	1	14
zmp_ph4	sa1376	polr1a	ENSDARG00000098375	3	0.734811	1	12904	680	1283	63	0.0526968	0.0491037	0.0395686	1	14
zmp_ph4	sa1376	polr1a	ENSDARG00000098375	4	0.384515	1	12904	499	1283	52	0.0386702	0.04053	0.0318777	1	14
zmp_ph4	sa1376	polr1a	ENSDARG00000098375	5	0.548047	1	12904	761	1283	75	0.058974	0.0584567	0.0480547	1	14
zmp_ph4	sa1376	polr1a	ENSDARG00000098375	6	0.832714	1	12904	580	1283	51	0.0449473	0.0397506	0.0311835	1	14
zmp_ph4	sa1376	polr1a	ENSDARG00000098375	7	0.946834	1	12904	653	1283	53	0.0506045	0.0413094	0.0325727	1	14
zmp_ph4	sa1376	polr1a	ENSDARG00000098375	8	0.172378	1	12904	550	1283	62	0.0426224	0.0483242	0.0388656	1	14
zmp_ph4	sa1376	polr1a	ENSDARG00000098375	9	0.123797	1	12904	479	1283	56	0.0371203	0.0436477	0.0346631	1	14
zmp_ph4	sa1376	polr1a	ENSDARG00000098375	10	0.679511	1	12904	439	1283	41	0.0340205	0.0319564	0.0242989	1	14
zmp_ph4	sa1376	polr1a	ENSDARG00000098375	11	0.875324	1	12904	442	1283	37	0.0342529	0.0288387	0.021579	1	14
zmp_ph4	sa1376	polr1a	ENSDARG00000098375	12	0.0993985	1	12904	489	1283	58	0.0378952	0.0452065	0.0360609	1	14
zmp_ph4	sa1376	polr1a	ENSDARG00000098375	13	0.773534	1	12904	511	1283	46	0.0396001	0.0358535	0.0277275	1	14
zmp_ph4	sa1376	polr1a	ENSDARG00000098375	14	0.000734117	0.0183529	12904	479	1283	71	0.0371203	0.055339	0.0452163	1	14
zmp_ph4	sa1376	polr1a	ENSDARG00000098375	15	0.505646	1	12904	440	1283	44	0.034098	0.0342946	0.0263525	1	14
zmp_ph4	sa1376	polr1a	ENSDARG00000098375	16	0.425807	1	12904	566	1283	58	0.0438624	0.0452065	0.0360609	1	14
zmp_ph4	sa1376	polr1a	ENSDARG00000098375	17	0.974425	1	12904	463	1283	34	0.0358803	0.0265004	0.0195547	1	14
zmp_ph4	sa1376	polr1a	ENSDARG00000098375	18	0.713521	1	12904	414	1283	38	0.0320831	0.0296181	0.0222569	1	14
zmp_ph4	sa1376	polr1a	ENSDARG00000098375	19	0.124394	1	12904	554	1283	64	0.0429324	0.0498831	0.0402723	1	14
zmp_ph4	sa1376	polr1a	ENSDARG00000098375	20	0.563143	1	12904	541	1283	53	0.041925	0.0413094	0.0325727	1	14
zmp_ph4	sa1376	polr1a	ENSDARG00000098375	21	0.567729	1	12904	491	1283	48	0.0380502	0.0374123	0.0291069	1	14
zmp_ph4	sa1376	polr1a	ENSDARG00000098375	22	0.562014	1	12904	429	1283	42	0.0332455	0.0327358	0.0249822	1	14
zmp_ph4	sa1376	polr1a	ENSDARG00000098375	23	0.125761	1	12904	517	1283	60	0.0400651	0.0467654	0.0374617	1	14
zmp_ph4	sa1376	polr1a	ENSDARG00000098375	24	0.826922	1	12904	363	1283	31	0.0281308	0.0241621	0.0175457	1	14
zmp_ph4	sa1376	polr1a	ENSDARG00000098375	25	0.585404	1	12904	392	1283	38	0.0303782	0.0296181	0.0222569	1	14
zmp_ph5	sa1260	GREB1	ENSDARG00000070794	1	0.221032	1	6180	256	98	6	0.0414239	0.0612245	0.0269963	1	17
zmp_ph5	sa1260	GREB1	ENSDARG00000070794	2	0.994164	1	6180	316	98	1	0.0511327	0.0102041	0.000523264	1	17
zmp_ph5	sa1260	GREB1	ENSDARG00000070794	3	0.0660015	1	6180	367	98	10	0.0593851	0.102041	0.056413	1	17
zmp_ph5	sa1260	GREB1	ENSDARG00000070794	4	0.962729	1	6180	204	98	1	0.0330097	0.0102041	0.000523264	1	17
zmp_ph5	sa1260	GREB1	ENSDARG00000070794	5	0.0379821	0.949552	6180	332	98	10	0.0537217	0.102041	0.056413	1	17
zmp_ph5	sa1260	GREB1	ENSDARG00000070794	6	0.865996	1	6180	304	98	3	0.0491909	0.0306122	0.00839473	1	17
zmp_ph5	sa1260	GREB1	ENSDARG00000070794	7	0.886685	1	6180	319	98	3	0.0516181	0.0306122	0.00839473	1	17
zmp_ph5	sa1260	GREB1	ENSDARG00000070794	8	0.888021	1	6180	233	98	2	0.0377023	0.0204082	0.00363815	1	17
zmp_ph5	sa1260	GREB1	ENSDARG00000070794	9	0.452314	1	6180	217	98	4	0.0351133	0.0408163	0.0140602	1	17
zmp_ph5	sa1260	GREB1	ENSDARG00000070794	10	0.014168	0.354199	6180	240	98	9	0.038835	0.0918367	0.0487486	1	17
zmp_ph5	sa1260	GREB1	ENSDARG00000070794	11	0.851669	1	6180	211	98	2	0.0341424	0.0204082	0.00363815	1	17
zmp_ph5	sa1260	GREB1	ENSDARG00000070794	12	1	1	6180	206	98	0	0.0333333	0	0	1	17
zmp_ph5	sa1260	GREB1	ENSDARG00000070794	13	0.904222	1	6180	245	98	2	0.039644	0.0204082	0.00363815	1	17
zmp_ph5	sa1260	GREB1	ENSDARG00000070794	14	0.310613	1	6180	233	98	5	0.0377023	0.0510204	0.0203161	1	17
zmp_ph5	sa1260	GREB1	ENSDARG00000070794	15	0.133122	1	6180	218	98	6	0.0352751	0.0612245	0.0269963	1	17
zmp_ph5	sa1260	GREB1	ENSDARG00000070794	16	0.133718	1	6180	268	98	7	0.0433657	0.0714286	0.0340016	1	17
zmp_ph5	sa1260	GREB1	ENSDARG00000070794	17	0.223294	1	6180	204	98	5	0.0330097	0.0510204	0.0203161	1	17
zmp_ph5	sa1260	GREB1	ENSDARG00000070794	18	0.96085	1	6180	201	98	1	0.0325243	0.0102041	0.000523264	1	17
zmp_ph5	sa1260	GREB1	ENSDARG00000070794	19	0.160768	1	6180	282	98	7	0.0456311	0.0714286	0.0340016	1	17
zmp_ph5	sa1260	GREB1	ENSDARG00000070794	20	0.615863	1	6180	267	98	4	0.0432039	0.0408163	0.0140602	1	17
zmp_ph5	sa1260	GREB1	ENSDARG00000070794	21	0.789988	1	6180	262	98	3	0.0423948	0.0306122	0.00839473	1	17
zmp_ph5	sa1260	GREB1	ENSDARG00000070794	22	0.593926	1	6180	193	98	3	0.0312298	0.0306122	0.00839473	1	17
zmp_ph5	sa1260	GREB1	ENSDARG00000070794	23	1	1	6180	241	98	0	0.0389968	0	0	1	17
zmp_ph5	sa1260	GREB1	ENSDARG00000070794	24	0.816644	1	6180	194	98	2	0.0313916	0.0204082	0.00363815	1	17
zmp_ph5	sa1260	GREB1	ENSDARG00000070794	25	0.74601	1	6180	167	98	2	0.0270227	0.0204082	0.00363815	1	17
zmp_ph6	sa1022	nol9	ENSDARG00000077751	1	0.498536	1	11578	523	656	30	0.0451719	0.0457317	0.0331065	1	23
zmp_ph6	sa1022	nol9	ENSDARG00000077751	2	0.570173	1	11578	558	656	31	0.0481949	0.0472561	0.0344145	1	23
zmp_ph6	sa1022	nol9	ENSDARG00000077751	3	0.568003	1	11578	629	656	35	0.0543272	0.0533537	0.0396844	1	23
zmp_ph6	sa1022	nol9	ENSDARG00000077751	4	0.451186	1	11578	355	656	21	0.0306616	0.0320122	0.0215493	1	23
zmp_ph6	sa1022	nol9	ENSDARG00000077751	5	0.424323	1	11578	662	656	39	0.0571774	0.0594512	0.0450074	1	23
zmp_ph6	sa1022	nol9	ENSDARG00000077751	6	0.528172	1	11578	530	656	30	0.0457765	0.0457317	0.0331065	1	23
zmp_ph6	sa1022	nol9	ENSDARG00000077751	7	0.434385	1	11578	595	656	35	0.0513906	0.0533537	0.0396844	1	23
zmp_ph6	sa1022	nol9	ENSDARG00000077751	8	0.846938	1	11578	490	656	23	0.0423216	0.035061	0.0240788	1	23
zmp_ph6	sa1022	nol9	ENSDARG00000077751	9	0.0161317	0.403293	11578	419	656	35	0.0361893	0.0533537	0.0396844	1	23
zmp_ph6	sa1022	nol9	ENSDARG00000077751	10	0.699874	1	11578	426	656	22	0.0367939	0.0335366	0.0228108	1	23
zmp_ph6	sa1022	nol9	ENSDARG00000077751	11	0.478583	1	11578	413	656	24	0.0356711	0.0365854	0.0253529	1	23
zmp_ph6	sa1022	nol9	ENSDARG00000077751	12	0.985323	1	11578	409	656	14	0.0353256	0.0213415	0.0129473	1	23
zmp_ph6	sa1022	nol9	ENSDARG00000077751	13	0.909678	1	11578	460	656	20	0.0397305	0.0304878	0.0202947	1	23
zmp_ph6	sa1022	nol9	ENSDARG00000077751	14	0.886209	1	11578	428	656	19	0.0369667	0.0289634	0.0190476	1	23
zmp_ph6	sa1022	nol9	ENSDARG00000077751	15	0.949845	1	11578	405	656	16	0.0349801	0.0243902	0.0153571	1	23
zmp_ph6	sa1022	nol9	ENSDARG00000077751	16	0.252006	1	11578	513	656	33	0.0443082	0.0503049	0.0370422	1	23
zmp_ph6	sa1022	nol9	ENSDARG00000077751	17	0.884019	1	11578	427	656	19	0.0368803	0.0289634	0.0190476	1	23
zmp_ph6	sa1022	nol9	ENSDARG00000077751	18	0.809643	1	11578	380	656	18	0.0328209	0.027439	0.0178085	1	23
zmp_ph6	sa1022	nol9	ENSDARG00000077751	19	0.379209	1	11578	495	656	30	0.0427535	0.0457317	0.0331065	1	23
zmp_ph6	sa1022	nol9	ENSDARG00000077751	20	0.754948	1	11578	497	656	25	0.0429262	0.0381098	0.0266326	1	23
zmp_ph6	sa1022	nol9	ENSDARG00000077751	21	0.254155	1	11578	447	656	29	0.0386077	0.0442073	0.0318026	1	23
zmp_ph6	sa1022	nol9	ENSDARG00000077751	22	0.23135	1	11578	375	656	25	0.032389	0.0381098	0.0266326	1	23
zmp_ph6	sa1022	nol9	ENSDARG00000077751	23	0.0181115	0.452787	11578	467	656	38	0.0403351	0.0579268	0.0436721	1	23
zmp_ph6	sa1022	nol9	ENSDARG00000077751	24	0.218204	1	11578	339	656	23	0.0292797	0.035061	0.0240788	1	23
zmp_ph6	sa1022	nol9	ENSDARG00000077751	25	0.275152	1	11578	336	656	22	0.0290206	0.0335366	0.0228108	1	23
zmp_ph7	sa379	lamc1	ENSDARG00000036279	1	0.142824	1	10186	474	237	15	0.0465345	0.0632911	0.0394148	1	2
zmp_ph7	sa379	lamc1	ENSDARG00000036279	2	0.322312	1	10186	478	237	13	0.0469272	0.0548523	0.0327468	1	2
zmp_ph7	sa379	lamc1	ENSDARG00000036279	3	0.00973246	0.243312	10186	549	237	22	0.0538975	0.092827	0.0636806	1	2
zmp_ph7	sa379	lamc1	ENSDARG00000036279	4	0.117001	1	10186	349	237	12	0.0342627	0.0506329	0.0294723	1	2
zmp_ph7	sa379	lamc1	ENSDARG00000036279	5	0.511357	1	10186	591	237	14	0.0580208	0.0590717	0.0360624	1	2
zmp_ph7	sa379	lamc1	ENSDARG00000036279	6	0.30149	1	10186	470	237	13	0.0461418	0.0548523	0.0327468	1	2
zmp_ph7	sa379	lamc1	ENSDARG00000036279	7	0.993687	1	10186	518	237	5	0.0508541	0.021097	0.00834877	1	2
zmp_ph7	sa379	lamc1	ENSDARG00000036279	8	0.973625	1	10186	431	237	5	0.042313	0.021097	0.00834877	1	2
zmp_ph7	sa379	lamc1	ENSDARG00000036279	9	0.00479225	0.119806	10186	359	237	17	0.0352445	0.07173	0.0462172	1	2
zmp_ph7	sa379	lamc1	ENSDARG00000036279	10	0.493352	1	10186	370	237	9	0.0363244	0.0379747	0.0199513	1	2
zmp_ph7	sa379	lamc1	ENSDARG00000036279	11	0.96984	1	10186	361	237	4	0.0354408	0.0168776	0.00578506	1	2
zmp_ph7	sa379	lamc1	ENSDARG00000036279	12	0.649907	1	10186	376	237	8	0.0369134	0.0337553	0.0169052	1	2
zmp_ph7	sa379	lamc1	ENSDARG00000036279	13	0.599315	1	10186	404	237	9	0.0396623	0.0379747	0.0199513	1	2
zmp_ph7	sa379	lamc1	ENSDARG00000036279	14	0.817384	1	10186	396	237	7	0.0388769	0.0295359	0.0139424	1	2
zmp_ph7	sa379	lamc1	ENSDARG00000036279	15	0.99595	1	10186	325	237	2	0.0319065	0.00843882	0.00150146	1	2
zmp_ph7	sa379	lamc1	ENSDARG00000036279	16	0.256234	1	10186	452	237	13	0.0443746	0.0548523	0.0327468	1	2
zmp_ph7	sa379	lamc1	ENSDARG00000036279	17	0.826308	1	10186	350	237	6	0.0343609	0.0253165	0.0110815	1	2
zmp_ph7	sa379	lamc1	ENSDARG00000036279	18	0.956075	1	10186	338	237	4	0.0331828	0.0168776	0.00578506	1	2
zmp_ph7	sa379	lamc1	ENSDARG00000036279	19	0.101102	1	10186	447	237	15	0.0438838	0.0632911	0.0394148	1	2
zmp_ph7	sa379	lamc1	ENSDARG00000036279	20	0.775298	1	10186	425	237	8	0.0417239	0.0337553	0.0169052	1	2
zmp_ph7	sa379	lamc1	ENSDARG00000036279	21	0.995328	1	10186	396	237	3	0.0388769	0.0126582	0.00345882	1	2
zmp_ph7	sa379	lamc1	ENSDARG00000036279	22	0.896286	1	10186	338	237	5	0.0331828	0.021097	0.00834877	1	2
zmp_ph7	sa379	lamc1	ENSDARG00000036279	23	0.1606	1	10186	409	237	13	0.0401532	0.0548523	0.0327468	1	2
zmp_ph7	sa379	lamc1	ENSDARG00000036279	24	0.0338268	0.845669	10186	282	237	12	0.0276851	0.0506329	0.0294723	1	2
zmp_ph7	sa379	lamc1	ENSDARG00000036279	25	0.970526	1	10186	298	237	3	0.0292558	0.0126582	0.00345882	1	2
zmp_ph8	sa1311	PLD1	ENSDARG00000057125	1	0.409914	1	1930	83	12	1	0.0430052	0.0833333	0.00426532	1	24
zmp_ph8	sa1311	PLD1	ENSDARG00000057125	2	1	1	1930	89	12	0	0.046114	0	0	1	24
zmp_ph8	sa1311	PLD1	ENSDARG00000057125	3	0.207727	1	1930	137	12	2	0.0709845	0.166667	0.0304602	1	24
zmp_ph8	sa1311	PLD1	ENSDARG00000057125	4	0.279458	1	1930	52	12	1	0.026943	0.0833333	0.00426532	1	24
zmp_ph8	sa1311	PLD1	ENSDARG00000057125	5	0.119385	1	1930	97	12	2	0.0502591	0.166667	0.0304602	1	24
zmp_ph8	sa1311	PLD1	ENSDARG00000057125	6	0.502227	1	1930	109	12	1	0.0564767	0.0833333	0.00426532	1	24
zmp_ph8	sa1311	PLD1	ENSDARG00000057125	7	1	1	1930	94	12	0	0.0487047	0	0	1	24
zmp_ph8	sa1311	PLD1	ENSDARG00000057125	8	1	1	1930	72	12	0	0.0373057	0	0	1	24
zmp_ph8	sa1311	PLD1	ENSDARG00000057125	9	0.390457	1	1930	78	12	1	0.0404145	0.0833333	0.00426532	1	24
zmp_ph8	sa1311	PLD1	ENSDARG00000057125	10	1	1	1930	66	12	0	0.0341969	0	0	1	24
zmp_ph8	sa1311	PLD1	ENSDARG00000057125	11	1	1	1930	71	12	0	0.0367876	0	0	1	24
zmp_ph8	sa1311	PLD1	ENSDARG00000057125	12	0.328503	1	1930	63	12	1	0.0326425	0.0833333	0.00426532	1	24
zmp_ph8	sa1311	PLD1	ENSDARG00000057125	13	1	1	1930	62	12	0	0.0321244	0	0	1	24
zmp_ph8	sa1311	PLD1	ENSDARG00000057125	14	1	1	1930	74	12	0	0.038342	0	0	1	24
zmp_ph8	sa1311	PLD1	ENSDARG00000057125	15	1	1	1930	65	12	0	0.0336788	0	0	1	24
zmp_ph8	sa1311	PLD1	ENSDARG00000057125	16	1	1	1930	79	12	0	0.0409326	0	0	1	24
zmp_ph8	sa1311	PLD1	ENSDARG00000057125	17	0.311034	1	1930	59	12	1	0.0305699	0.0833333	0.00426532	1	24
zmp_ph8	sa1311	PLD1	ENSDARG00000057125	18	1	1	1930	52	12	0	0.026943	0	0	1	24
zmp_ph8	sa1311	PLD1	ENSDARG00000057125	19	0.488946	1	1930	105	12	1	0.0544041	0.0833333	0.00426532	1	24
zmp_ph8	sa1311	PLD1	ENSDARG00000057125	20	1	1	1930	66	12	0	0.0341969	0	0	1	24
zmp_ph8	sa1311	PLD1	ENSDARG00000057125	21	1	1	1930	90	12	0	0.0466321	0	0	1	24
zmp_ph8	sa1311	PLD1	ENSDARG00000057125	22	1	1	1930	68	12	0	0.0352332	0	0	1	24
zmp_ph8	sa1311	PLD1	ENSDARG00000057125	23	0.439865	1	1930	91	12	1	0.0471503	0.0833333	0.00426532	1	24
zmp_ph8	sa1311	PLD1	ENSDARG00000057125	24	1	1	1930	57	12	0	0.0295337	0	0	1	24
zmp_ph8	sa1311	PLD1	ENSDARG00000057125	25	1	1	1930	51	12	0	0.0264249	0	0	1	24
zmp_ph9	sa1349	MDN1	ENSDARG00000008976	1	0.501073	1	15311	700	2574	118	0.0457188	0.045843	0.0392547	1	20
zmp_ph9	sa1349	MDN1	ENSDARG00000008976	2	0.318706	1	15311	758	2574	133	0.0495069	0.0516706	0.0446811	1	20
zmp_ph9	sa1349	MDN1	ENSDARG00000008976	3	0.0169281	0.423201	15311	803	2574	160	0.052446	0.0621601	0.0545104	1	20
zmp_ph9	sa1349	MDN1	ENSDARG00000008976	4	0.112402	1	15311	508	2574	97	0.0331788	0.0376845	0.0317101	1	20
zmp_ph9	sa1349	MDN1	ENSDARG00000008976	5	0.734491	1	15311	862	2574	138	0.0562994	0.0536131	0.0464957	1	20
zmp_ph9	sa1349	MDN1	ENSDARG00000008976	6	0.810169	1	15311	701	2574	109	0.0457841	0.0423465	0.0360131	1	20
zmp_ph9	sa1349	MDN1	ENSDARG00000008976	7	0.622569	1	15311	798	2574	131	0.0521194	0.0508936	0.043956	1	20
zmp_ph9	sa1349	MDN1	ENSDARG00000008976	8	0.995621	1	15311	644	2574	83	0.0420613	0.0322455	0.0267229	1	20
zmp_ph9	sa1349	MDN1	ENSDARG00000008976	9	0.0729003	1	15311	573	2574	111	0.0374241	0.0431235	0.0367325	1	20
zmp_ph9	sa1349	MDN1	ENSDARG00000008976	10	0.715944	1	15311	541	2574	86	0.0353341	0.033411	0.0277882	1	20
zmp_ph9	sa1349	MDN1	ENSDARG00000008976	11	0.576253	1	15311	538	2574	89	0.0351381	0.0345765	0.0288555	1	20
zmp_ph9	sa1349	MDN1	ENSDARG00000008976	12	0.278467	1	15311	565	2574	101	0.0369016	0.0392385	0.0331418	1	20
zmp_ph9	sa1349	MDN1	ENSDARG00000008976	13	0.447256	1	15311	591	2574	101	0.0385997	0.0392385	0.0331418	1	20
zmp_ph9	sa1349	MDN1	ENSDARG00000008976	14	0.569218	1	15311	549	2574	91	0.0358566	0.0353535	0.029568	1	20
zmp_ph9	sa1349	MDN1	ENSDARG00000008976	15	0.6838	1	15311	548	2574	88	0.0357913	0.034188	0.0284995	1	20
zmp_ph9	sa1349	MDN1	ENSDARG00000008976	16	0.146431	1	15311	681	2574	126	0.0444778	0.048951	0.0421454	1	20
zmp_ph9	sa1349	MDN1	ENSDARG00000008976	17	0.863918	1	15311	590	2574	89	0.0385344	0.0345765	0.0288555	1	20
zmp_ph9	sa1349	MDN1	ENSDARG00000008976	18	0.887935	1	15311	483	2574	71	0.0315459	0.0275835	0.0224827	1	20
zmp_ph9	sa1349	MDN1	ENSDARG00000008976	19	0.676299	1	15311	638	2574	103	0.0416694	0.0400155	0.0338587	1	20
zmp_ph9	sa1349	MDN1	ENSDARG00000008976	20	0.0906097	1	15311	630	2574	120	0.0411469	0.04662	0.0399766	1	20
zmp_ph9	sa1349	MDN1	ENSDARG00000008976	21	0.0893815	1	15311	568	2574	109	0.0370975	0.0423465	0.0360131	1	20
zmp_ph9	sa1349	MDN1	ENSDARG00000008976	22	0.833975	1	15311	520	2574	79	0.0339625	0.0306915	0.0253055	1	20
zmp_ph9	sa1349	MDN1	ENSDARG00000008976	23	0.942795	1	15311	606	2574	87	0.0395794	0.0337995	0.0281438	1	20
zmp_ph9	sa1349	MDN1	ENSDARG00000008976	24	0.172046	1	15311	443	2574	83	0.0289334	0.0322455	0.0267229	1	20
zmp_ph9	sa1349	MDN1	ENSDARG00000008976	25	0.848221	1	15311	473	2574	71	0.0308928	0.0275835	0.0224827	1	20
zmp_ph10	sa3219	tfip11	ENSDARG00000056932	1	0.553405	1	17448	768	3368	147	0.0440165	0.0436461	0.038003	1	23
zmp_ph10	sa3219	tfip11	ENSDARG00000056932	2	0.925862	1	17448	797	3368	137	0.0456786	0.040677	0.0352277	1	23
zmp_ph10	sa3219	tfip11	ENSDARG00000056932	3	0.167196	1	17448	912	3368	189	0.0522696	0.0561164	0.0497327	1	23
zmp_ph10	sa3219	tfip11	ENSDARG00000056932	4	0.999313	1	17448	791	3368	116	0.0453347	0.0344418	0.029427	1	23
zmp_ph10	sa3219	tfip11	ENSDARG00000056932	5	0.426353	1	17448	1016	3368	199	0.0582302	0.0590855	0.0525401	1	23
zmp_ph10	sa3219	tfip11	ENSDARG00000056932	6	0.845827	1	17448	770	3368	137	0.0441311	0.040677	0.0352277	1	23
zmp_ph10	sa3219	tfip11	ENSDARG00000056932	7	0.163543	1	17448	896	3368	186	0.0513526	0.0552257	0.0488915	1	23
zmp_ph10	sa3219	tfip11	ENSDARG00000056932	8	0.489845	1	17448	753	3368	146	0.0431568	0.0433492	0.0377252	1	23
zmp_ph10	sa3219	tfip11	ENSDARG00000056932	9	0.0743848	1	17448	650	3368	142	0.0372536	0.0421615	0.0366144	1	23
zmp_ph10	sa3219	tfip11	ENSDARG00000056932	10	0.762716	1	17448	591	3368	107	0.0338721	0.0317696	0.0269543	1	23
zmp_ph10	sa3219	tfip11	ENSDARG00000056932	11	0.105793	1	17448	597	3368	129	0.034216	0.0383017	0.0330132	1	23
zmp_ph10	sa3219	tfip11	ENSDARG00000056932	12	0.341768	1	17448	628	3368	126	0.0359927	0.0374109	0.0321842	1	23
zmp_ph10	sa3219	tfip11	ENSDARG00000056932	13	0.83077	1	17448	680	3368	121	0.0389729	0.0359264	0.0308044	1	23
zmp_ph10	sa3219	tfip11	ENSDARG00000056932	14	0.652151	1	17448	605	3368	113	0.0346745	0.0335511	0.0286018	1	23
zmp_ph10	sa3219	tfip11	ENSDARG00000056932	15	0.0014361	0.0359024	17448	632	3368	156	0.0362219	0.0463183	0.0405072	1	23
zmp_ph10	sa3219	tfip11	ENSDARG00000056932	16	0.126551	1	17448	771	3368	163	0.0441884	0.0483967	0.0424586	1	23
zmp_ph10	sa3219	tfip11	ENSDARG00000056932	17	0.690875	1	17448	648	3368	120	0.0371389	0.0356295	0.0305287	1	23
zmp_ph10	sa3219	tfip11	ENSDARG00000056932	18	0.723099	1	17448	547	3368	100	0.0313503	0.0296912	0.0250376	1	23
zmp_ph10	sa3219	tfip11	ENSDARG00000056932	19	0.5685	1	17448	713	3368	136	0.0408643	0.04038	0.0349506	1	23
zmp_ph10	sa3219	tfip11	ENSDARG00000056932	20	0.869462	1	17448	717	3368	126	0.0410935	0.0374109	0.0321842	1	23
zmp_ph10	sa3219	tfip11	ENSDARG00000056932	21	0.754737	1	17448	659	3368	120	0.0377694	0.0356295	0.0305287	1	23
zmp_ph10	sa3219	tfip11	ENSDARG00000056932	22	0.278816	1	17448	608	3368	124	0.0348464	0.0368171	0.031632	1	23
zmp_ph10	sa3219	tfip11	ENSDARG00000056932	23	0.103566	1	17448	675	3368	145	0.0386864	0.0430523	0.0374473	1	23
zmp_ph10	sa3219	tfip11	ENSDARG00000056932	24	0.966182	1	17448	496	3368	79	0.0284273	0.0234561	0.0193281	1	23
zmp_ph10	sa3219	tfip11	ENSDARG00000056932	25	0.43084	1	17448	528	3368	104	0.0302613	0.0308789	0.0261321	1	23
zmp_ph11	sa126	ptf1a	ENSDARG00000014479	1	0.447016	1	10643	474	761	35	0.0445363	0.0459921	0.0341788	1	2
zmp_ph11	sa126	ptf1a	ENSDARG00000014479	2	0.147288	1	10643	521	761	44	0.0489524	0.0578187	0.0445425	1	2
zmp_ph11	sa126	ptf1a	ENSDARG00000014479	3	0.896879	1	10643	593	761	35	0.0557174	0.0459921	0.0341788	1	2
zmp_ph11	sa126	ptf1a	ENSDARG00000014479	4	0.0364628	0.91157	10643	342	761	34	0.0321338	0.0446781	0.03304	1	2
zmp_ph11	sa126	ptf1a	ENSDARG00000014479	5	0.892883	1	10643	591	761	35	0.0555295	0.0459921	0.0341788	1	2
zmp_ph11	sa126	ptf1a	ENSDARG00000014479	6	0.0664797	1	10643	485	761	44	0.0455699	0.0578187	0.0445425	1	2
zmp_ph11	sa126	ptf1a	ENSDARG00000014479	7	0.675412	1	10643	551	761	37	0.0517711	0.0486202	0.0364646	1	2
zmp_ph11	sa126	ptf1a	ENSDARG00000014479	8	0.579074	1	10643	444	761	31	0.0417176	0.0407359	0.029642	1	2
zmp_ph11	sa126	ptf1a	ENSDARG00000014479	9	0.996905	1	10643	366	761	14	0.0343888	0.0183968	0.0111555	1	2
zmp_ph11	sa126	ptf1a	ENSDARG00000014479	10	0.326155	1	10643	382	761	30	0.0358921	0.0394218	0.0285158	1	2
zmp_ph11	sa126	ptf1a	ENSDARG00000014479	11	0.754523	1	10643	379	761	24	0.0356103	0.0315375	0.0218397	1	2
zmp_ph11	sa126	ptf1a	ENSDARG00000014479	12	0.589259	1	10643	389	761	27	0.0365498	0.0354796	0.0251592	1	2
zmp_ph11	sa126	ptf1a	ENSDARG00000014479	13	0.747682	1	10643	422	761	27	0.0396505	0.0354796	0.0251592	1	2
zmp_ph11	sa126	ptf1a	ENSDARG00000014479	14	0.961403	1	10643	397	761	20	0.0373015	0.0262812	0.0174838	1	2
zmp_ph11	sa126	ptf1a	ENSDARG00000014479	15	0.0703075	1	10643	363	761	34	0.0341069	0.0446781	0.03304	1	2
zmp_ph11	sa126	ptf1a	ENSDARG00000014479	16	0.104888	1	10643	479	761	42	0.0450061	0.0551905	0.0422233	1	2
zmp_ph11	sa126	ptf1a	ENSDARG00000014479	17	0.999283	1	10643	382	761	13	0.0358921	0.0170828	0.0101334	1	2
zmp_ph11	sa126	ptf1a	ENSDARG00000014479	18	0.979559	1	10643	350	761	16	0.0328855	0.021025	0.0132312	1	2
zmp_ph11	sa126	ptf1a	ENSDARG00000014479	19	0.28911	1	10643	468	761	37	0.0439726	0.0486202	0.0364646	1	2
zmp_ph11	sa126	ptf1a	ENSDARG00000014479	20	0.491463	1	10643	455	761	33	0.0427511	0.043364	0.0319042	1	2
zmp_ph11	sa126	ptf1a	ENSDARG00000014479	21	0.0521625	1	10643	414	761	39	0.0388988	0.0512484	0.0387609	1	2
zmp_ph11	sa126	ptf1a	ENSDARG00000014479	22	0.0559499	1	10643	331	761	32	0.0311003	0.0420499	0.0307715	1	2
zmp_ph11	sa126	ptf1a	ENSDARG00000014479	23	0.594121	1	10643	447	761	31	0.0419994	0.0407359	0.029642	1	2
zmp_ph11	sa126	ptf1a	ENSDARG00000014479	24	0.704174	1	10643	309	761	20	0.0290332	0.0262812	0.0174838	1	2
zmp_ph11	sa126	ptf1a	ENSDARG00000014479	25	0.169587	1	10643	309	761	27	0.0290332	0.0354796	0.0251592	1	2
zmp_ph12	sa638	rpl13	ENSDARG00000099380	1	0.479909	1	17191	774	7679	347	0.0450236	0.0451882	0.0413526	1	7
zmp_ph12	sa638	rpl13	ENSDARG00000099380	2	0.0525774	1	17191	800	7679	388	0.046536	0.0505274	0.0464779	1	7
zmp_ph12	sa638	rpl13	ENSDARG00000099380	3	0.112243	1	17191	895	7679	424	0.0520621	0.0552155	0.0509888	1	7
zmp_ph12	sa638	rpl13	ENSDARG00000099380	4	0.998604	1	17191	696	7679	261	0.0404863	0.0339888	0.0306542	1	7
zmp_ph12	sa638	rpl13	ENSDARG00000099380	5	0.843515	1	17191	992	7679	423	0.0577046	0.0550853	0.0508634	1	7
zmp_ph12	sa638	rpl13	ENSDARG00000099380	6	0.312522	1	17191	774	7679	355	0.0450236	0.04623	0.0423515	1	7
zmp_ph12	sa638	rpl13	ENSDARG00000099380	7	0.185798	1	17191	887	7679	414	0.0515968	0.0539133	0.0497348	1	7
zmp_ph12	sa638	rpl13	ENSDARG00000099380	8	0.734132	1	17191	729	7679	315	0.0424059	0.041021	0.0373626	1	7
zmp_ph12	sa638	rpl13	ENSDARG00000099380	9	0.793288	1	17191	652	7679	278	0.0379268	0.0362026	0.0327624	1	7
zmp_ph12	sa638	rpl13	ENSDARG00000099380	10	0.365546	1	17191	598	7679	273	0.0347856	0.0355515	0.0321419	1	7
zmp_ph12	sa638	rpl13	ENSDARG00000099380	11	0.181292	1	17191	591	7679	279	0.0343785	0.0363329	0.0328865	1	7
zmp_ph12	sa638	rpl13	ENSDARG00000099380	12	0.318356	1	17191	642	7679	295	0.0373451	0.0384165	0.0348741	1	7
zmp_ph12	sa638	rpl13	ENSDARG00000099380	13	0.411003	1	17191	669	7679	303	0.0389157	0.0394583	0.035869	1	7
zmp_ph12	sa638	rpl13	ENSDARG00000099380	14	0.264443	1	17191	601	7679	279	0.0349602	0.0363329	0.0328865	1	7
zmp_ph12	sa638	rpl13	ENSDARG00000099380	15	0.947208	1	17191	610	7679	247	0.0354837	0.0321656	0.0289209	1	7
zmp_ph12	sa638	rpl13	ENSDARG00000099380	16	0.746384	1	17191	751	7679	324	0.0436856	0.042193	0.0384838	1	7
zmp_ph12	sa638	rpl13	ENSDARG00000099380	17	0.82551	1	17191	645	7679	273	0.0375196	0.0355515	0.0321419	1	7
zmp_ph12	sa638	rpl13	ENSDARG00000099380	18	0.267782	1	17191	553	7679	257	0.032168	0.0334679	0.0301587	1	7
zmp_ph12	sa638	rpl13	ENSDARG00000099380	19	0.0883467	1	17191	692	7679	333	0.0402536	0.043365	0.0396057	1	7
zmp_ph12	sa638	rpl13	ENSDARG00000099380	20	0.574571	1	17191	714	7679	316	0.0415334	0.0411512	0.0374871	1	7
zmp_ph12	sa638	rpl13	ENSDARG00000099380	21	0.228809	1	17191	643	7679	300	0.0374033	0.0390676	0.0354958	1	7
zmp_ph12	sa638	rpl13	ENSDARG00000099380	22	0.806207	1	17191	578	7679	245	0.0336222	0.0319052	0.0286735	1	7
zmp_ph12	sa638	rpl13	ENSDARG00000099380	23	0.649515	1	17191	681	7679	298	0.0396138	0.0388071	0.0352471	1	7
zmp_ph12	sa638	rpl13	ENSDARG00000099380	24	0.509415	1	17191	497	7679	222	0.0289105	0.02891	0.025833	1	7
zmp_ph12	sa638	rpl13	ENSDARG00000099380	25	0.648785	1	17191	527	7679	230	0.0306556	0.0299518	0.0268201	1	7
zmp_ph13	sa787	ttna	ENSDARG00000028213	1	0.076813	1	11372	502	263	17	0.0441435	0.0646388	0.0416014	1	9
zmp_ph13	sa787	ttna	ENSDARG00000028213	2	0.491792	1	11372	544	263	13	0.0478368	0.0494297	0.0294821	1	9
zmp_ph13	sa787	ttna	ENSDARG00000028213	3	0.725837	1	11372	595	263	12	0.0523215	0.0456274	0.0265354	1	9
zmp_ph13	sa787	ttna	ENSDARG00000028213	4	0.927299	1	11372	366	263	5	0.0321843	0.0190114	0.00752019	1	9
zmp_ph13	sa787	ttna	ENSDARG00000028213	5	0.890135	1	11372	650	263	11	0.0571579	0.0418251	0.0236299	1	9
zmp_ph13	sa787	ttna	ENSDARG00000028213	6	0.630241	1	11372	508	263	11	0.0446711	0.0418251	0.0236299	1	9
zmp_ph13	sa787	ttna	ENSDARG00000028213	7	0.993694	1	11372	587	263	6	0.051618	0.0228137	0.00998092	1	9
zmp_ph13	sa787	ttna	ENSDARG00000028213	8	0.886265	1	11372	493	263	8	0.0433521	0.0304183	0.0152241	1	9
zmp_ph13	sa787	ttna	ENSDARG00000028213	9	1.347e-09	3.36749e-08	11372	421	263	33	0.0370208	0.125475	0.0932683	1	9
zmp_ph13	sa787	ttna	ENSDARG00000028213	10	0.160099	1	11372	411	263	13	0.0361414	0.0494297	0.0294821	1	9
zmp_ph13	sa787	ttna	ENSDARG00000028213	11	0.49532	1	11372	416	263	10	0.0365811	0.0380228	0.0207712	1	9
zmp_ph13	sa787	ttna	ENSDARG00000028213	12	0.00982085	0.245521	11372	421	263	18	0.0370208	0.0684411	0.0446998	1	9
zmp_ph13	sa787	ttna	ENSDARG00000028213	13	0.993153	1	11372	450	263	4	0.0395709	0.0152091	0.00521136	1	9
zmp_ph13	sa787	ttna	ENSDARG00000028213	14	0.782065	1	11372	431	263	8	0.0379001	0.0304183	0.0152241	1	9
zmp_ph13	sa787	ttna	ENSDARG00000028213	15	0.66302	1	11372	383	263	8	0.0336792	0.0304183	0.0152241	1	9
zmp_ph13	sa787	ttna	ENSDARG00000028213	16	0.835498	1	11372	509	263	9	0.0447591	0.0342205	0.0179663	1	9
zmp_ph13	sa787	ttna	ENSDARG00000028213	17	0.827598	1	11372	404	263	7	0.0355259	0.026616	0.0125569	1	9
zmp_ph13	sa787	ttna	ENSDARG00000028213	18	0.998323	1	11372	369	263	2	0.0324481	0.00760456	0.00135284	1	9
zmp_ph13	sa787	ttna	ENSDARG00000028213	19	0.367746	1	11372	498	263	13	0.0437918	0.0494297	0.0294821	1	9
zmp_ph13	sa787	ttna	ENSDARG00000028213	20	0.932309	1	11372	483	263	7	0.0424727	0.026616	0.0125569	1	9
zmp_ph13	sa787	ttna	ENSDARG00000028213	21	0.3242	1	11372	441	263	12	0.0387795	0.0456274	0.0265354	1	9
zmp_ph13	sa787	ttna	ENSDARG00000028213	22	0.350406	1	11372	369	263	10	0.0324481	0.0380228	0.0207712	1	9
zmp_ph13	sa787	ttna	ENSDARG00000028213	23	0.279394	1	11372	464	263	13	0.040802	0.0494297	0.0294821	1	9
zmp_ph13	sa787	ttna	ENSDARG00000028213	24	0.623867	1	11372	324	263	7	0.028491	0.026616	0.0125569	1	9
zmp_ph13	sa787	ttna	ENSDARG00000028213	25	0.783935	1	11372	333	263	6	0.0292824	0.0228137	0.00998092	1	9
zmp_ph14	sa2206	nup88	ENSDARG00000003235	1	0.26764	1	18013	808	3805	179	0.0448565	0.0470434	0.0415257	1	5
zmp_ph14	sa2206	nup88	ENSDARG00000003235	2	0.559385	1	18013	855	3805	179	0.0474657	0.0470434	0.0415257	1	5
zmp_ph14	sa2206	nup88	ENSDARG00000003235	3	0.24674	1	18013	929	3805	206	0.0515739	0.0541393	0.0482292	1	5
zmp_ph14	sa2206	nup88	ENSDARG00000003235	4	0.994586	1	18013	706	3805	120	0.0391939	0.0315375	0.0270148	1	5
zmp_ph14	sa2206	nup88	ENSDARG00000003235	5	0.596951	1	18013	1028	3805	214	0.0570699	0.0562418	0.0502213	1	5
zmp_ph14	sa2206	nup88	ENSDARG00000003235	6	0.332857	1	18013	810	3805	177	0.0449675	0.0465177	0.0410305	1	5
zmp_ph14	sa2206	nup88	ENSDARG00000003235	7	0.654005	1	18013	928	3805	191	0.0515183	0.0501971	0.0445011	1	5
zmp_ph14	sa2206	nup88	ENSDARG00000003235	8	0.621164	1	18013	774	3805	160	0.042969	0.0420499	0.0368293	1	5
zmp_ph14	sa2206	nup88	ENSDARG00000003235	9	0.448401	1	18013	687	3805	147	0.0381391	0.0386334	0.0336277	1	5
zmp_ph14	sa2206	nup88	ENSDARG00000003235	10	0.825059	1	18013	640	3805	125	0.0355299	0.0328515	0.0282352	1	5
zmp_ph14	sa2206	nup88	ENSDARG00000003235	11	0.296178	1	18013	609	3805	135	0.0338089	0.0354796	0.030682	1	5
zmp_ph14	sa2206	nup88	ENSDARG00000003235	12	0.229267	1	18013	658	3805	148	0.0365292	0.0388962	0.0338736	1	5
zmp_ph14	sa2206	nup88	ENSDARG00000003235	13	0.724069	1	18013	704	3805	142	0.0390829	0.0373193	0.0323991	1	5
zmp_ph14	sa2206	nup88	ENSDARG00000003235	14	0.216965	1	18013	642	3805	145	0.0356409	0.0381078	0.033136	1	5
zmp_ph14	sa2206	nup88	ENSDARG00000003235	15	0.342005	1	18013	653	3805	143	0.0362516	0.0375821	0.0326447	1	5
zmp_ph14	sa2206	nup88	ENSDARG00000003235	16	0.933462	1	18013	792	3805	149	0.0439682	0.039159	0.0341195	1	5
zmp_ph14	sa2206	nup88	ENSDARG00000003235	17	0.876323	1	18013	682	3805	131	0.0378615	0.0344284	0.0297023	1	5
zmp_ph14	sa2206	nup88	ENSDARG00000003235	18	0.788913	1	18013	574	3805	113	0.0318659	0.0296978	0.0253099	1	5
zmp_ph14	sa2206	nup88	ENSDARG00000003235	19	0.683035	1	18013	731	3805	149	0.0405818	0.039159	0.0341195	1	5
zmp_ph14	sa2206	nup88	ENSDARG00000003235	20	0.3908	1	18013	735	3805	159	0.0408039	0.0417871	0.0365827	1	5
zmp_ph14	sa2206	nup88	ENSDARG00000003235	21	0.0101654	0.254135	18013	671	3805	170	0.0372509	0.0446781	0.0392987	1	5
zmp_ph14	sa2206	nup88	ENSDARG00000003235	22	0.152631	1	18013	620	3805	143	0.0344196	0.0375821	0.0326447	1	5
zmp_ph14	sa2206	nup88	ENSDARG00000003235	23	0.736507	1	18013	711	3805	143	0.0394715	0.0375821	0.0326447	1	5
zmp_ph14	sa2206	nup88	ENSDARG00000003235	24	0.438514	1	18013	521	3805	112	0.0289236	0.029435	0.0250667	1	5
zmp_ph14	sa2206	nup88	ENSDARG00000003235	25	0.186537	1	18013	545	3805	125	0.0302559	0.0328515	0.0282352	1	5
zmp_ph15	sa1556	CYFIP2	ENSDARG00000036375	1	0.184594	1	13704	609	68	5	0.0444396	0.0735294	0.0294185	1	14
zmp_ph15	sa1556	CYFIP2	ENSDARG00000036375	2	0.652091	1	13704	670	68	3	0.0488908	0.0441176	0.0121313	1	14
zmp_ph15	sa1556	CYFIP2	ENSDARG00000036375	3	0.297717	1	13704	732	68	5	0.0534151	0.0735294	0.0294185	1	14
zmp_ph15	sa1556	CYFIP2	ENSDARG00000036375	4	0.385776	1	13704	449	68	3	0.0327642	0.0441176	0.0121313	1	14
zmp_ph15	sa1556	CYFIP2	ENSDARG00000036375	5	0.981308	1	13704	779	68	1	0.0568447	0.0147059	0.000754029	1	14
zmp_ph15	sa1556	CYFIP2	ENSDARG00000036375	6	0.620932	1	13704	640	68	3	0.0467017	0.0441176	0.0121313	1	14
zmp_ph15	sa1556	CYFIP2	ENSDARG00000036375	7	0.870806	1	13704	705	68	2	0.0514448	0.0294118	0.00525094	1	14
zmp_ph15	sa1556	CYFIP2	ENSDARG00000036375	8	0.944649	1	13704	571	68	1	0.0416667	0.0147059	0.000754029	1	14
zmp_ph15	sa1556	CYFIP2	ENSDARG00000036375	9	0.228816	1	13704	493	68	4	0.0359749	0.0588235	0.0203401	1	14
zmp_ph15	sa1556	CYFIP2	ENSDARG00000036375	10	0.439192	1	13704	489	68	3	0.035683	0.0441176	0.0121313	1	14
zmp_ph15	sa1556	CYFIP2	ENSDARG00000036375	11	0.910102	1	13704	477	68	1	0.0348074	0.0147059	0.000754029	1	14
zmp_ph15	sa1556	CYFIP2	ENSDARG00000036375	12	1	1	13704	507	68	0	0.0369965	0	0	1	14
zmp_ph15	sa1556	CYFIP2	ENSDARG00000036375	13	0.505955	1	13704	541	68	3	0.0394775	0.0441176	0.0121313	1	14
zmp_ph15	sa1556	CYFIP2	ENSDARG00000036375	14	0.0986884	1	13704	494	68	5	0.0360479	0.0735294	0.0294185	1	14
zmp_ph15	sa1556	CYFIP2	ENSDARG00000036375	15	0.218274	1	13704	483	68	4	0.0352452	0.0588235	0.0203401	1	14
zmp_ph15	sa1556	CYFIP2	ENSDARG00000036375	16	1	1	13704	615	68	0	0.0448774	0	0	1	14
zmp_ph15	sa1556	CYFIP2	ENSDARG00000036375	17	0.928328	1	13704	521	68	1	0.0380181	0.0147059	0.000754029	1	14
zmp_ph15	sa1556	CYFIP2	ENSDARG00000036375	18	0.892955	1	13704	443	68	1	0.0323263	0.0147059	0.000754029	1	14
zmp_ph15	sa1556	CYFIP2	ENSDARG00000036375	19	0.0231931	0.579827	13704	572	68	7	0.0417396	0.102941	0.0493194	1	14
zmp_ph15	sa1556	CYFIP2	ENSDARG00000036375	20	0.552172	1	13704	579	68	3	0.0422504	0.0441176	0.0121313	1	14
zmp_ph15	sa1556	CYFIP2	ENSDARG00000036375	21	0.729789	1	13704	515	68	2	0.0375803	0.0294118	0.00525094	1	14
zmp_ph15	sa1556	CYFIP2	ENSDARG00000036375	22	0.400597	1	13704	460	68	3	0.0335668	0.0441176	0.0121313	1	14
zmp_ph15	sa1556	CYFIP2	ENSDARG00000036375	23	0.29666	1	13704	555	68	4	0.0404991	0.0588235	0.0203401	1	14
zmp_ph15	sa1556	CYFIP2	ENSDARG00000036375	24	0.865224	1	13704	398	68	1	0.0290426	0.0147059	0.000754029	1	14
zmp_ph15	sa1556	CYFIP2	ENSDARG00000036375	25	0.328677	1	13704	407	68	3	0.0296994	0.0441176	0.0121313	1	14
zmp_ph16	sa1022	nol9	ENSDARG00000077751	1	0.635771	1	15681	721	1799	80	0.0459792	0.0444691	0.0367547	1	23
zmp_ph16	sa1022	nol9	ENSDARG00000077751	2	0.945789	1	15681	757	1799	73	0.048275	0.0405781	0.0332109	1	23
zmp_ph16	sa1022	nol9	ENSDARG00000077751	3	0.702556	1	15681	816	1799	89	0.0520375	0.0494719	0.0413356	1	23
zmp_ph16	sa1022	nol9	ENSDARG00000077751	4	0.687206	1	15681	517	1799	56	0.0329698	0.0311284	0.0246906	1	23
zmp_ph16	sa1022	nol9	ENSDARG00000077751	5	0.8244	1	15681	886	1799	93	0.0565015	0.0516954	0.0433794	1	23
zmp_ph16	sa1022	nol9	ENSDARG00000077751	6	0.542711	1	15681	720	1799	82	0.0459154	0.0455809	0.0377704	1	23
zmp_ph16	sa1022	nol9	ENSDARG00000077751	7	0.698091	1	15681	806	1799	88	0.0513998	0.0489161	0.0408253	1	23
zmp_ph16	sa1022	nol9	ENSDARG00000077751	8	0.986516	1	15681	660	1799	58	0.0420892	0.0322401	0.0256856	1	23
zmp_ph16	sa1022	nol9	ENSDARG00000077751	9	0.0900097	1	15681	589	1799	79	0.0375614	0.0439133	0.0362474	1	23
zmp_ph16	sa1022	nol9	ENSDARG00000077751	10	0.77325	1	15681	562	1799	59	0.0358396	0.032796	0.0261839	1	23
zmp_ph16	sa1022	nol9	ENSDARG00000077751	11	0.381103	1	15681	543	1799	65	0.0346279	0.0361312	0.0291845	1	23
zmp_ph16	sa1022	nol9	ENSDARG00000077751	12	0.804805	1	15681	588	1799	61	0.0374976	0.0339077	0.0271821	1	23
zmp_ph16	sa1022	nol9	ENSDARG00000077751	13	0.436023	1	15681	613	1799	72	0.0390919	0.0400222	0.0327061	1	23
zmp_ph16	sa1022	nol9	ENSDARG00000077751	14	0.741764	1	15681	555	1799	59	0.0353932	0.032796	0.0261839	1	23
zmp_ph16	sa1022	nol9	ENSDARG00000077751	15	0.242352	1	15681	567	1799	71	0.0361584	0.0394664	0.0322017	1	23
zmp_ph16	sa1022	nol9	ENSDARG00000077751	16	0.563855	1	15681	689	1799	78	0.0439385	0.0433574	0.0357404	1	23
zmp_ph16	sa1022	nol9	ENSDARG00000077751	17	0.932562	1	15681	606	1799	58	0.0386455	0.0322401	0.0256856	1	23
zmp_ph16	sa1022	nol9	ENSDARG00000077751	18	0.963112	1	15681	501	1799	45	0.0319495	0.0250139	0.0192632	1	23
zmp_ph16	sa1022	nol9	ENSDARG00000077751	19	0.238695	1	15681	650	1799	81	0.0414514	0.045025	0.0372624	1	23
zmp_ph16	sa1022	nol9	ENSDARG00000077751	20	0.449187	1	15681	650	1799	76	0.0414514	0.0422457	0.0347274	1	23
zmp_ph16	sa1022	nol9	ENSDARG00000077751	21	0.000809735	0.0202434	15681	583	1799	94	0.0371788	0.0522513	0.0438911	1	23
zmp_ph16	sa1022	nol9	ENSDARG00000077751	22	0.00448153	0.112038	15681	536	1799	83	0.0341815	0.0461367	0.0382788	1	23
zmp_ph16	sa1022	nol9	ENSDARG00000077751	23	0.003954	0.0988501	15681	624	1799	95	0.0397934	0.0528071	0.044403	1	23
zmp_ph16	sa1022	nol9	ENSDARG00000077751	24	0.359617	1	15681	471	1799	57	0.0300363	0.0316843	0.0251878	1	23
zmp_ph16	sa1022	nol9	ENSDARG00000077751	25	0.851645	1	15681	471	1799	47	0.0300363	0.0261256	0.0202437	1	23
zmp_ph18	sa6050	cacna1c	ENSDARG00000008398	1	0.148851	1	14761	668	1111	58	0.0452544	0.0522052	0.0416719	1	4
zmp_ph18	sa6050	cacna1c	ENSDARG00000008398	2	0.0396416	0.991041	14761	701	1111	66	0.04749	0.0594059	0.0481699	1	4
zmp_ph18	sa6050	cacna1c	ENSDARG00000008398	3	0.0073966	0.184915	14761	779	1111	78	0.0527742	0.070207	0.0580062	1	4
zmp_ph18	sa6050	cacna1c	ENSDARG00000008398	4	0.668439	1	14761	481	1111	34	0.0325859	0.0306031	0.0225932	1	4
zmp_ph18	sa6050	cacna1c	ENSDARG00000008398	5	0.737648	1	14761	830	1111	58	0.0562293	0.0522052	0.0416719	1	4
zmp_ph18	sa6050	cacna1c	ENSDARG00000008398	6	0.524521	1	14761	692	1111	52	0.0468803	0.0468047	0.0368362	1	4
zmp_ph18	sa6050	cacna1c	ENSDARG00000008398	7	0.684518	1	14761	773	1111	55	0.0523677	0.049505	0.0392496	1	4
zmp_ph18	sa6050	cacna1c	ENSDARG00000008398	8	0.527563	1	14761	626	1111	47	0.0424091	0.0423042	0.0328356	1	4
zmp_ph18	sa6050	cacna1c	ENSDARG00000008398	9	0.648048	1	14761	545	1111	39	0.0369216	0.0351035	0.0265012	1	4
zmp_ph18	sa6050	cacna1c	ENSDARG00000008398	10	0.0584214	1	14761	538	1111	51	0.0364474	0.0459046	0.0360338	1	4
zmp_ph18	sa6050	cacna1c	ENSDARG00000008398	11	0.930771	1	14761	524	1111	31	0.0354989	0.0279028	0.0202714	1	4
zmp_ph18	sa6050	cacna1c	ENSDARG00000008398	12	0.411965	1	14761	548	1111	43	0.0371249	0.0387039	0.0296572	1	4
zmp_ph18	sa6050	cacna1c	ENSDARG00000008398	13	0.855818	1	14761	590	1111	38	0.0399702	0.0342034	0.0257161	1	4
zmp_ph18	sa6050	cacna1c	ENSDARG00000008398	14	0.655453	1	14761	533	1111	38	0.0361087	0.0342034	0.0257161	1	4
zmp_ph18	sa6050	cacna1c	ENSDARG00000008398	15	0.956973	1	14761	529	1111	30	0.0358377	0.0270027	0.0195019	1	4
zmp_ph18	sa6050	cacna1c	ENSDARG00000008398	16	0.767618	1	14761	659	1111	45	0.0446447	0.0405041	0.0312438	1	4
zmp_ph18	sa6050	cacna1c	ENSDARG00000008398	17	0.814329	1	14761	561	1111	37	0.0380056	0.0333033	0.0249327	1	4
zmp_ph18	sa6050	cacna1c	ENSDARG00000008398	18	0.984364	1	14761	472	1111	24	0.0319762	0.0216022	0.0149392	1	4
zmp_ph18	sa6050	cacna1c	ENSDARG00000008398	19	0.262831	1	14761	616	1111	51	0.0417316	0.0459046	0.0360338	1	4
zmp_ph18	sa6050	cacna1c	ENSDARG00000008398	20	0.8894	1	14761	619	1111	39	0.0419348	0.0351035	0.0265012	1	4
zmp_ph18	sa6050	cacna1c	ENSDARG00000008398	21	0.0388703	0.971758	14761	546	1111	53	0.0369894	0.0477048	0.0376397	1	4
zmp_ph18	sa6050	cacna1c	ENSDARG00000008398	22	0.579223	1	14761	476	1111	35	0.0322471	0.0315032	0.0233711	1	4
zmp_ph18	sa6050	cacna1c	ENSDARG00000008398	23	0.0587934	1	14761	586	1111	55	0.0396992	0.049505	0.0392496	1	4
zmp_ph18	sa6050	cacna1c	ENSDARG00000008398	24	0.942926	1	14761	426	1111	24	0.0288598	0.0216022	0.0149392	1	4
zmp_ph18	sa6050	cacna1c	ENSDARG00000008398	25	0.745593	1	14761	443	1111	30	0.0300115	0.0270027	0.0195019	1	4
zmp_ph19	sa1029	ttna	ENSDARG00000028213	1	0.228243	1	15229	686	2162	105	0.0450456	0.0485661	0.041189	1	9
zmp_ph19	sa1029	ttna	ENSDARG00000028213	2	0.0134394	0.335986	15229	732	2162	127	0.0480662	0.0587419	0.0506403	1	9
zmp_ph19	sa1029	ttna	ENSDARG00000028213	3	0.100129	1	15229	797	2162	127	0.0523344	0.0587419	0.0506403	1	9
zmp_ph19	sa1029	ttna	ENSDARG00000028213	4	0.749906	1	15229	516	2162	68	0.0338827	0.0314524	0.0255236	1	9
zmp_ph19	sa1029	ttna	ENSDARG00000028213	5	0.786847	1	15229	860	2162	114	0.0564712	0.052729	0.0450457	1	9
zmp_ph19	sa1029	ttna	ENSDARG00000028213	6	0.380024	1	15229	702	2162	103	0.0460963	0.0476411	0.040334	1	9
zmp_ph19	sa1029	ttna	ENSDARG00000028213	7	0.426255	1	15229	801	2162	116	0.052597	0.053654	0.0459046	1	9
zmp_ph19	sa1029	ttna	ENSDARG00000028213	8	0.204791	1	15229	640	2162	99	0.0420251	0.0457909	0.0386264	1	9
zmp_ph19	sa1029	ttna	ENSDARG00000028213	9	0.0395601	0.989003	15229	575	2162	98	0.0377569	0.0453284	0.0382	1	9
zmp_ph19	sa1029	ttna	ENSDARG00000028213	10	0.217326	1	15229	548	2162	85	0.035984	0.0393154	0.0326774	1	9
zmp_ph19	sa1029	ttna	ENSDARG00000028213	11	0.815659	1	15229	537	2162	69	0.0352617	0.0319149	0.0259418	1	9
zmp_ph19	sa1029	ttna	ENSDARG00000028213	12	0.148152	1	15229	559	2162	89	0.0367063	0.0411656	0.0343724	1	9
zmp_ph19	sa1029	ttna	ENSDARG00000028213	13	0.873275	1	15229	597	2162	75	0.0392015	0.0346901	0.0284586	1	9
zmp_ph19	sa1029	ttna	ENSDARG00000028213	14	0.763864	1	15229	548	2162	72	0.035984	0.0333025	0.0271987	1	9
zmp_ph19	sa1029	ttna	ENSDARG00000028213	15	0.918069	1	15229	545	2162	66	0.035787	0.0305273	0.0246881	1	9
zmp_ph19	sa1029	ttna	ENSDARG00000028213	16	0.218415	1	15229	677	2162	104	0.0444547	0.0481036	0.0407614	1	9
zmp_ph19	sa1029	ttna	ENSDARG00000028213	17	0.968024	1	15229	582	2162	67	0.0382166	0.0309898	0.0251056	1	9
zmp_ph19	sa1029	ttna	ENSDARG00000028213	18	0.987844	1	15229	488	2162	52	0.0320441	0.0240518	0.0188859	1	9
zmp_ph19	sa1029	ttna	ENSDARG00000028213	19	0.12045	1	15229	631	2162	101	0.0414341	0.046716	0.0394798	1	9
zmp_ph19	sa1029	ttna	ENSDARG00000028213	20	0.876696	1	15229	628	2162	79	0.0412371	0.0365402	0.0301427	1	9
zmp_ph19	sa1029	ttna	ENSDARG00000028213	21	0.391326	1	15229	572	2162	84	0.0375599	0.0388529	0.0322543	1	9
zmp_ph19	sa1029	ttna	ENSDARG00000028213	22	0.928027	1	15229	488	2162	58	0.0320441	0.026827	0.0213619	1	9
zmp_ph19	sa1029	ttna	ENSDARG00000028213	23	0.662979	1	15229	609	2162	83	0.0399895	0.0383904	0.0318314	1	9
zmp_ph19	sa1029	ttna	ENSDARG00000028213	24	0.475342	1	15229	452	2162	65	0.0296802	0.0300648	0.0242709	1	9
zmp_ph19	sa1029	ttna	ENSDARG00000028213	25	0.889941	1	15229	459	2162	56	0.0301399	0.0259019	0.0205346	1	9
zmp_ph20	sa674	las1l	ENSDARG00000062457	1	0.519076	1	8523	372	109	5	0.0436466	0.0458716	0.0182462	1	5
zmp_ph20	sa674	las1l	ENSDARG00000062457	2	0.640215	1	8523	426	109	5	0.0499824	0.0458716	0.0182462	1	5
zmp_ph20	sa674	las1l	ENSDARG00000062457	3	0.952083	1	8523	487	109	3	0.0571395	0.0275229	0.00754289	1	5
zmp_ph20	sa674	las1l	ENSDARG00000062457	4	0.502066	1	8523	287	109	4	0.0336736	0.0366972	0.0126304	1	5
zmp_ph20	sa674	las1l	ENSDARG00000062457	5	0.530709	1	8523	456	109	6	0.0535023	0.0550459	0.024241	1	5
zmp_ph20	sa674	las1l	ENSDARG00000062457	6	0.755877	1	8523	399	109	4	0.0468145	0.0366972	0.0126304	1	5
zmp_ph20	sa674	las1l	ENSDARG00000062457	7	0.185549	1	8523	430	109	8	0.0504517	0.0733945	0.0370423	1	5
zmp_ph20	sa674	las1l	ENSDARG00000062457	8	0.67419	1	8523	357	109	4	0.0418867	0.0366972	0.0126304	1	5
zmp_ph20	sa674	las1l	ENSDARG00000062457	9	0.54231	1	8523	302	109	4	0.0354335	0.0366972	0.0126304	1	5
zmp_ph20	sa674	las1l	ENSDARG00000062457	10	0.570771	1	8523	313	109	4	0.0367242	0.0366972	0.0126304	1	5
zmp_ph20	sa674	las1l	ENSDARG00000062457	11	0.980402	1	8523	302	109	1	0.0354335	0.00917431	0.00047047	1	5
zmp_ph20	sa674	las1l	ENSDARG00000062457	12	0.752287	1	8523	305	109	3	0.0357855	0.0275229	0.00754289	1	5
zmp_ph20	sa674	las1l	ENSDARG00000062457	13	0.787827	1	8523	324	109	3	0.0380148	0.0275229	0.00754289	1	5
zmp_ph20	sa674	las1l	ENSDARG00000062457	14	0.585885	1	8523	319	109	4	0.0374281	0.0366972	0.0126304	1	5
zmp_ph20	sa674	las1l	ENSDARG00000062457	15	0.714429	1	8523	287	109	3	0.0336736	0.0275229	0.00754289	1	5
zmp_ph20	sa674	las1l	ENSDARG00000062457	16	0.00269366	0.0673416	8523	368	109	12	0.0431773	0.110092	0.0647653	1	5
zmp_ph20	sa674	las1l	ENSDARG00000062457	17	0.738059	1	8523	298	109	3	0.0349642	0.0275229	0.00754289	1	5
zmp_ph20	sa674	las1l	ENSDARG00000062457	18	0.880439	1	8523	283	109	2	0.0332043	0.0183486	0.0032699	1	5
zmp_ph20	sa674	las1l	ENSDARG00000062457	19	0.957331	1	8523	379	109	2	0.0444679	0.0183486	0.0032699	1	5
zmp_ph20	sa674	las1l	ENSDARG00000062457	20	0.204769	1	8523	375	109	7	0.0439986	0.0642202	0.0305257	1	5
zmp_ph20	sa674	las1l	ENSDARG00000062457	21	0.160166	1	8523	349	109	7	0.040948	0.0642202	0.0305257	1	5
zmp_ph20	sa674	las1l	ENSDARG00000062457	22	0.00694381	0.173595	8523	264	109	9	0.030975	0.0825688	0.0437504	1	5
zmp_ph20	sa674	las1l	ENSDARG00000062457	23	1	1	8523	340	109	0	0.0398921	0	0	1	5
zmp_ph20	sa674	las1l	ENSDARG00000062457	24	0.842472	1	8523	256	109	2	0.0300364	0.0183486	0.0032699	1	5
zmp_ph20	sa674	las1l	ENSDARG00000062457	25	0.383023	1	8523	245	109	4	0.0287457	0.0366972	0.0126304	1	5
zmp_ph23	sa2597	top1l	ENSDARG00000070545	1	0.620105	1	10230	467	528	23	0.04565	0.0435606	0.0299516	1	11
zmp_ph23	sa2597	top1l	ENSDARG00000070545	2	0.877926	1	10230	487	528	20	0.0476051	0.0378788	0.025242	1	11
zmp_ph23	sa2597	top1l	ENSDARG00000070545	3	0.373447	1	10230	542	528	30	0.0529814	0.0568182	0.0411903	1	11
zmp_ph23	sa2597	top1l	ENSDARG00000070545	4	0.104688	1	10230	335	528	23	0.0327468	0.0435606	0.0299516	1	11
zmp_ph23	sa2597	top1l	ENSDARG00000070545	5	0.980331	1	10230	580	528	20	0.056696	0.0378788	0.025242	1	11
zmp_ph23	sa2597	top1l	ENSDARG00000070545	6	0.727227	1	10230	475	528	22	0.0464321	0.0416667	0.0283734	1	11
zmp_ph23	sa2597	top1l	ENSDARG00000070545	7	0.997681	1	10230	515	528	14	0.0503421	0.0265152	0.0160997	1	11
zmp_ph23	sa2597	top1l	ENSDARG00000070545	8	0.602614	1	10230	423	528	21	0.041349	0.0397727	0.0268034	1	11
zmp_ph23	sa2597	top1l	ENSDARG00000070545	9	0.00647931	0.161983	10230	370	528	31	0.0361681	0.0587121	0.042819	1	11
zmp_ph23	sa2597	top1l	ENSDARG00000070545	10	0.782705	1	10230	366	528	16	0.0357771	0.030303	0.0190979	1	11
zmp_ph23	sa2597	top1l	ENSDARG00000070545	11	0.0957966	1	10230	365	528	25	0.0356794	0.0473485	0.0331305	1	11
zmp_ph23	sa2597	top1l	ENSDARG00000070545	12	0.0037849	0.0946224	10230	371	528	32	0.0362659	0.0606061	0.0444527	1	11
zmp_ph23	sa2597	top1l	ENSDARG00000070545	13	0.768514	1	10230	404	528	18	0.0394917	0.0340909	0.022148	1	11
zmp_ph23	sa2597	top1l	ENSDARG00000070545	14	0.570702	1	10230	396	528	20	0.0387097	0.0378788	0.025242	1	11
zmp_ph23	sa2597	top1l	ENSDARG00000070545	15	0.825125	1	10230	336	528	14	0.0328446	0.0265152	0.0160997	1	11
zmp_ph23	sa2597	top1l	ENSDARG00000070545	16	0.270457	1	10230	459	528	27	0.044868	0.0511364	0.0363365	1	11
zmp_ph23	sa2597	top1l	ENSDARG00000070545	17	0.577758	1	10230	358	528	18	0.0349951	0.0340909	0.022148	1	11
zmp_ph23	sa2597	top1l	ENSDARG00000070545	18	0.918102	1	10230	329	528	12	0.0321603	0.0227273	0.0131651	1	11
zmp_ph23	sa2597	top1l	ENSDARG00000070545	19	0.115546	1	10230	460	528	30	0.0449658	0.0568182	0.0411903	1	11
zmp_ph23	sa2597	top1l	ENSDARG00000070545	20	0.97847	1	10230	433	528	14	0.0423265	0.0265152	0.0160997	1	11
zmp_ph23	sa2597	top1l	ENSDARG00000070545	21	0.00687738	0.171934	10230	387	528	32	0.0378299	0.0606061	0.0444527	1	11
zmp_ph23	sa2597	top1l	ENSDARG00000070545	22	0.944543	1	10230	346	528	12	0.0338221	0.0227273	0.0131651	1	11
zmp_ph23	sa2597	top1l	ENSDARG00000070545	23	0.0719029	1	10230	420	528	29	0.0410557	0.0549242	0.0395668	1	11
zmp_ph23	sa2597	top1l	ENSDARG00000070545	24	0.968532	1	10230	295	528	9	0.0288368	0.0170455	0.00892049	1	11
zmp_ph23	sa2597	top1l	ENSDARG00000070545	25	0.539977	1	10230	311	528	16	0.0304008	0.030303	0.0190979	1	11
zmp_ph25	sa1029	nol9	ENSDARG00000077751	1	0.474145	1	11088	488	350	16	0.0440115	0.0457143	0.028881	1	23
zmp_ph25	sa1029	nol9	ENSDARG00000077751	2	0.949985	1	11088	532	350	11	0.0479798	0.0314286	0.0177234	1	23
zmp_ph25	sa1029	nol9	ENSDARG00000077751	3	0.40418	1	11088	590	350	20	0.0532107	0.0571429	0.0381879	1	23
zmp_ph25	sa1029	nol9	ENSDARG00000077751	4	0.995806	1	11088	351	350	4	0.0316558	0.0114286	0.00391292	1	23
zmp_ph25	sa1029	nol9	ENSDARG00000077751	5	0.290809	1	11088	640	350	23	0.0577201	0.0657143	0.0453256	1	23
zmp_ph25	sa1029	nol9	ENSDARG00000077751	6	0.811198	1	11088	506	350	13	0.0456349	0.0371429	0.0221074	1	23
zmp_ph25	sa1029	nol9	ENSDARG00000077751	7	0.700962	1	11088	563	350	16	0.0507756	0.0457143	0.028881	1	23
zmp_ph25	sa1029	nol9	ENSDARG00000077751	8	0.936109	1	11088	477	350	10	0.0430195	0.0285714	0.0155812	1	23
zmp_ph25	sa1029	nol9	ENSDARG00000077751	9	9.96134e-09	2.49034e-07	11088	403	350	37	0.0363456	0.105714	0.0798243	1	23
zmp_ph25	sa1029	nol9	ENSDARG00000077751	10	0.300724	1	11088	405	350	15	0.036526	0.0428571	0.0266004	1	23
zmp_ph25	sa1029	nol9	ENSDARG00000077751	11	0.960438	1	11088	385	350	7	0.0347222	0.02	0.00942331	1	23
zmp_ph25	sa1029	nol9	ENSDARG00000077751	12	0.0207888	0.519719	11088	408	350	21	0.0367965	0.06	0.0405538	1	23
zmp_ph25	sa1029	nol9	ENSDARG00000077751	13	0.820028	1	11088	439	350	11	0.0395924	0.0314286	0.0177234	1	23
zmp_ph25	sa1029	nol9	ENSDARG00000077751	14	0.707018	1	11088	430	350	12	0.0387807	0.0342857	0.0199002	1	23
zmp_ph25	sa1029	nol9	ENSDARG00000077751	15	0.397748	1	11088	373	350	13	0.03364	0.0371429	0.0221074	1	23
zmp_ph25	sa1029	nol9	ENSDARG00000077751	16	0.622081	1	11088	502	350	15	0.0452742	0.0428571	0.0266004	1	23
zmp_ph25	sa1029	nol9	ENSDARG00000077751	17	0.815295	1	11088	401	350	10	0.0361652	0.0285714	0.0155812	1	23
zmp_ph25	sa1029	nol9	ENSDARG00000077751	18	0.996472	1	11088	358	350	4	0.0322872	0.0114286	0.00391292	1	23
zmp_ph25	sa1029	nol9	ENSDARG00000077751	19	0.676325	1	11088	487	350	14	0.0439214	0.04	0.0243418	1	23
zmp_ph25	sa1029	nol9	ENSDARG00000077751	20	0.627956	1	11088	471	350	14	0.0424784	0.04	0.0243418	1	23
zmp_ph25	sa1029	nol9	ENSDARG00000077751	21	0.679811	1	11088	421	350	12	0.037969	0.0342857	0.0199002	1	23
zmp_ph25	sa1029	nol9	ENSDARG00000077751	22	0.229209	1	11088	353	350	14	0.0318362	0.04	0.0243418	1	23
zmp_ph25	sa1029	nol9	ENSDARG00000077751	23	0.444845	1	11088	448	350	15	0.040404	0.0428571	0.0266004	1	23
zmp_ph25	sa1029	nol9	ENSDARG00000077751	24	0.335434	1	11088	326	350	12	0.0294012	0.0342857	0.0199002	1	23
zmp_ph25	sa1029	nol9	ENSDARG00000077751	25	0.473694	1	11088	331	350	11	0.0298521	0.0314286	0.0177234	1	23
zmp_ph27	sa1029/sa787	ttna	ENSDARG00000028213	1	0.304771	1	9128	403	612	30	0.0441499	0.0490196	0.0355015	1	9
zmp_ph27	sa1029/sa787	ttna	ENSDARG00000028213	2	0.836925	1	9128	427	612	24	0.0467791	0.0392157	0.0271854	1	9
zmp_ph27	sa1029/sa787	ttna	ENSDARG00000028213	3	0.283676	1	9128	498	612	37	0.0545574	0.0604575	0.0454054	1	9
zmp_ph27	sa1029/sa787	ttna	ENSDARG00000028213	4	0.956746	1	9128	293	612	13	0.032099	0.0212418	0.0126093	1	9
zmp_ph27	sa1029/sa787	ttna	ENSDARG00000028213	5	0.796837	1	9128	527	612	31	0.0577344	0.0506536	0.0369045	1	9
zmp_ph27	sa1029/sa787	ttna	ENSDARG00000028213	6	0.467384	1	9128	421	612	29	0.0461218	0.0473856	0.0341029	1	9
zmp_ph27	sa1029/sa787	ttna	ENSDARG00000028213	7	0.737809	1	9128	463	612	28	0.050723	0.0457516	0.0327091	1	9
zmp_ph27	sa1029/sa787	ttna	ENSDARG00000028213	8	0.968071	1	9128	376	612	17	0.0411919	0.0277778	0.0177751	1	9
zmp_ph27	sa1029/sa787	ttna	ENSDARG00000028213	9	3.75517e-06	9.38792e-05	9128	330	612	46	0.0361525	0.0751634	0.0583737	1	9
zmp_ph27	sa1029/sa787	ttna	ENSDARG00000028213	10	0.804265	1	9128	336	612	19	0.0368098	0.0310458	0.0204234	1	9
zmp_ph27	sa1029/sa787	ttna	ENSDARG00000028213	11	0.546438	1	9128	331	612	22	0.0362621	0.0359477	0.0244592	1	9
zmp_ph27	sa1029/sa787	ttna	ENSDARG00000028213	12	0.284332	1	9128	342	612	26	0.0374671	0.0424837	0.0299363	1	9
zmp_ph27	sa1029/sa787	ttna	ENSDARG00000028213	13	0.991659	1	9128	362	612	14	0.0396582	0.0228758	0.0138817	1	9
zmp_ph27	sa1029/sa787	ttna	ENSDARG00000028213	14	0.29837	1	9128	359	612	27	0.0393295	0.0441176	0.0313201	1	9
zmp_ph27	sa1029/sa787	ttna	ENSDARG00000028213	15	0.58447	1	9128	292	612	19	0.0319895	0.0310458	0.0204234	1	9
zmp_ph27	sa1029/sa787	ttna	ENSDARG00000028213	16	0.850049	1	9128	415	612	23	0.0454645	0.0375817	0.025819	1	9
zmp_ph27	sa1029/sa787	ttna	ENSDARG00000028213	17	0.772211	1	9128	312	612	18	0.0341805	0.0294118	0.0190945	1	9
zmp_ph27	sa1029/sa787	ttna	ENSDARG00000028213	18	0.999216	1	9128	295	612	8	0.0323181	0.0130719	0.00652074	1	9
zmp_ph27	sa1029/sa787	ttna	ENSDARG00000028213	19	0.544544	1	9128	406	612	27	0.0444785	0.0441176	0.0313201	1	9
zmp_ph27	sa1029/sa787	ttna	ENSDARG00000028213	20	0.712148	1	9128	394	612	24	0.0431639	0.0392157	0.0271854	1	9
zmp_ph27	sa1029/sa787	ttna	ENSDARG00000028213	21	0.228557	1	9128	358	612	28	0.03922	0.0457516	0.0327091	1	9
zmp_ph27	sa1029/sa787	ttna	ENSDARG00000028213	22	0.120602	1	9128	289	612	25	0.0316608	0.0408497	0.028558	1	9
zmp_ph27	sa1029/sa787	ttna	ENSDARG00000028213	23	7.30403e-05	0.00182601	9128	384	612	47	0.0420684	0.0767974	0.059828	1	9
zmp_ph27	sa1029/sa787	ttna	ENSDARG00000028213	24	0.817679	1	9128	257	612	14	0.0281551	0.0228758	0.0138817	1	9
zmp_ph27	sa1029/sa787	ttna	ENSDARG00000028213	25	0.657946	1	9128	258	612	16	0.0282647	0.0261438	0.0164658	1	9
zmp_ph29	sa787	ttna	ENSDARG00000028213	1	0.115583	1	8901	393	824	44	0.0441523	0.0533981	0.0411171	1	9
zmp_ph29	sa787	ttna	ENSDARG00000028213	2	0.331777	1	8901	421	824	42	0.0472981	0.0509709	0.0389767	1	9
zmp_ph29	sa787	ttna	ENSDARG00000028213	3	0.68239	1	8901	494	824	43	0.0554994	0.0521845	0.0400459	1	9
zmp_ph29	sa787	ttna	ENSDARG00000028213	4	0.992098	1	8901	292	824	16	0.0328053	0.0194175	0.0122165	1	9
zmp_ph29	sa787	ttna	ENSDARG00000028213	5	0.773332	1	8901	514	824	43	0.0577463	0.0521845	0.0400459	1	9
zmp_ph29	sa787	ttna	ENSDARG00000028213	6	0.115916	1	8901	403	824	45	0.0452758	0.0546117	0.0421901	1	9
zmp_ph29	sa787	ttna	ENSDARG00000028213	7	0.81389	1	8901	444	824	36	0.049882	0.0436893	0.032606	1	9
zmp_ph29	sa787	ttna	ENSDARG00000028213	8	0.987735	1	8901	363	824	22	0.0407819	0.026699	0.0181425	1	9
zmp_ph29	sa787	ttna	ENSDARG00000028213	9	2.7405e-05	0.000685126	8901	321	824	54	0.0360634	0.065534	0.0519224	1	9
zmp_ph29	sa787	ttna	ENSDARG00000028213	10	0.558718	1	8901	318	824	29	0.0357263	0.0351942	0.0252894	1	9
zmp_ph29	sa787	ttna	ENSDARG00000028213	11	0.847223	1	8901	324	824	25	0.0364004	0.0303398	0.0211804	1	9
zmp_ph29	sa787	ttna	ENSDARG00000028213	12	0.165761	1	8901	327	824	36	0.0367374	0.0436893	0.032606	1	9
zmp_ph29	sa787	ttna	ENSDARG00000028213	13	0.949295	1	8901	362	824	25	0.0406696	0.0303398	0.0211804	1	9
zmp_ph29	sa787	ttna	ENSDARG00000028213	14	0.559995	1	8901	351	824	32	0.0394338	0.038835	0.0284076	1	9
zmp_ph29	sa787	ttna	ENSDARG00000028213	15	0.88366	1	8901	298	824	22	0.0334794	0.026699	0.0181425	1	9
zmp_ph29	sa787	ttna	ENSDARG00000028213	16	0.700824	1	8901	408	824	35	0.0458375	0.0424757	0.0315524	1	9
zmp_ph29	sa787	ttna	ENSDARG00000028213	17	0.53025	1	8901	303	824	28	0.0340411	0.0339806	0.0242566	1	9
zmp_ph29	sa787	ttna	ENSDARG00000028213	18	0.676819	1	8901	280	824	24	0.0314571	0.0291262	0.0201632	1	9
zmp_ph29	sa787	ttna	ENSDARG00000028213	19	0.464592	1	8901	401	824	38	0.0450511	0.0461165	0.0347206	1	9
zmp_ph29	sa787	ttna	ENSDARG00000028213	20	0.955475	1	8901	391	824	27	0.0439276	0.032767	0.0232273	1	9
zmp_ph29	sa787	ttna	ENSDARG00000028213	21	0.804128	1	8901	349	824	28	0.0392091	0.0339806	0.0242566	1	9
zmp_ph29	sa787	ttna	ENSDARG00000028213	22	0.150341	1	8901	274	824	31	0.0307831	0.0376214	0.027365	1	9
zmp_ph29	sa787	ttna	ENSDARG00000028213	23	0.0122836	0.30709	8901	368	824	48	0.0413437	0.0582524	0.0454197	1	9
zmp_ph29	sa787	ttna	ENSDARG00000028213	24	0.464682	1	8901	251	824	24	0.0281991	0.0291262	0.0201632	1	9
zmp_ph29	sa787	ttna	ENSDARG00000028213	25	0.240537	1	8901	251	824	27	0.0281991	0.032767	0.0232273	1	9
zmp_ph31	sa2206	nup88	ENSDARG00000003235	1	0.639758	1	14718	677	2044	91	0.0459981	0.0445205	0.0372619	1	5
zmp_ph31	sa2206	nup88	ENSDARG00000003235	2	0.328472	1	14718	708	2044	103	0.0481044	0.0503914	0.0426714	1	5
zmp_ph31	sa2206	nup88	ENSDARG00000003235	3	0.500338	1	14718	768	2044	107	0.052181	0.0523483	0.0444815	1	5
zmp_ph31	sa2206	nup88	ENSDARG00000003235	4	0.695357	1	14718	473	2044	62	0.0321375	0.0303327	0.0243545	1	5
zmp_ph31	sa2206	nup88	ENSDARG00000003235	5	0.586852	1	14718	813	2044	111	0.0552385	0.0543053	0.0462947	1	5
zmp_ph31	sa2206	nup88	ENSDARG00000003235	6	0.13437	1	14718	670	2044	104	0.0455225	0.0508806	0.0431236	1	5
zmp_ph31	sa2206	nup88	ENSDARG00000003235	7	0.579415	1	14718	768	2044	105	0.052181	0.0513699	0.043576	1	5
zmp_ph31	sa2206	nup88	ENSDARG00000003235	8	0.841309	1	14718	616	2044	77	0.0418535	0.0376712	0.0309969	1	5
zmp_ph31	sa2206	nup88	ENSDARG00000003235	9	0.358756	1	14718	544	2044	79	0.0369615	0.0386497	0.0318885	1	5
zmp_ph31	sa2206	nup88	ENSDARG00000003235	10	0.585564	1	14718	529	2044	72	0.0359424	0.035225	0.0287737	1	5
zmp_ph31	sa2206	nup88	ENSDARG00000003235	11	0.637818	1	14718	530	2044	71	0.0360103	0.0347358	0.0283301	1	5
zmp_ph31	sa2206	nup88	ENSDARG00000003235	12	0.0881882	1	14718	546	2044	88	0.0370974	0.0430528	0.0359149	1	5
zmp_ph31	sa2206	nup88	ENSDARG00000003235	13	0.725822	1	14718	575	2044	75	0.0390678	0.0366928	0.0301067	1	5
zmp_ph31	sa2206	nup88	ENSDARG00000003235	14	0.72387	1	14718	530	2044	69	0.0360103	0.0337573	0.027444	1	5
zmp_ph31	sa2206	nup88	ENSDARG00000003235	15	0.31095	1	14718	515	2044	76	0.0349912	0.037182	0.0305516	1	5
zmp_ph31	sa2206	nup88	ENSDARG00000003235	16	0.760435	1	14718	664	2044	86	0.0451148	0.0420744	0.0350182	1	5
zmp_ph31	sa2206	nup88	ENSDARG00000003235	17	0.930952	1	14718	555	2044	65	0.0377089	0.0318004	0.0256761	1	5
zmp_ph31	sa2206	nup88	ENSDARG00000003235	18	0.942364	1	14718	474	2044	54	0.0322055	0.0264188	0.0208501	1	5
zmp_ph31	sa2206	nup88	ENSDARG00000003235	19	0.097989	1	14718	617	2044	98	0.0419215	0.0479452	0.0404135	1	5
zmp_ph31	sa2206	nup88	ENSDARG00000003235	20	0.931379	1	14718	641	2044	76	0.0435521	0.037182	0.0305516	1	5
zmp_ph31	sa2206	nup88	ENSDARG00000003235	21	0.00463284	0.115821	14718	556	2044	101	0.0377769	0.0494129	0.0417676	1	5
zmp_ph31	sa2206	nup88	ENSDARG00000003235	22	0.178289	1	14718	490	2044	76	0.0332926	0.037182	0.0305516	1	5
zmp_ph31	sa2206	nup88	ENSDARG00000003235	23	0.554658	1	14718	575	2044	79	0.0390678	0.0386497	0.0318885	1	5
zmp_ph31	sa2206	nup88	ENSDARG00000003235	24	0.880336	1	14718	443	2044	53	0.0300992	0.0259295	0.0204142	1	5
zmp_ph31	sa2206	nup88	ENSDARG00000003235	25	0.28565	1	14718	441	2044	66	0.0299633	0.0322896	0.0261175	1	5
zmp_ph32	sa6115	si:ch211-168k14.2	ENSDARG00000056191	1	0.302128	1	7677	345	121	7	0.0449394	0.0578512	0.0274631	1	9
zmp_ph32	sa6115	si:ch211-168k14.2	ENSDARG00000056191	2	0.858769	1	7677	383	121	4	0.0498893	0.0330579	0.0113691	1	9
zmp_ph32	sa6115	si:ch211-168k14.2	ENSDARG00000056191	3	0.0775218	1	7677	430	121	11	0.0560115	0.0909091	0.0518201	1	9
zmp_ph32	sa6115	si:ch211-168k14.2	ENSDARG00000056191	4	0.91457	1	7677	256	121	2	0.0333464	0.0165289	0.00294474	1	9
zmp_ph32	sa6115	si:ch211-168k14.2	ENSDARG00000056191	5	0.350355	1	7677	423	121	8	0.0550996	0.0661157	0.0333209	1	9
zmp_ph32	sa6115	si:ch211-168k14.2	ENSDARG00000056191	6	0.920372	1	7677	353	121	3	0.0459815	0.0247934	0.00679112	1	9
zmp_ph32	sa6115	si:ch211-168k14.2	ENSDARG00000056191	7	0.988203	1	7677	400	121	2	0.0521037	0.0165289	0.00294474	1	9
zmp_ph32	sa6115	si:ch211-168k14.2	ENSDARG00000056191	8	0.877637	1	7677	315	121	3	0.0410317	0.0247934	0.00679112	1	9
zmp_ph32	sa6115	si:ch211-168k14.2	ENSDARG00000056191	9	0.615979	1	7677	269	121	4	0.0350397	0.0330579	0.0113691	1	9
zmp_ph32	sa6115	si:ch211-168k14.2	ENSDARG00000056191	10	0.0858881	1	7677	288	121	8	0.0375147	0.0661157	0.0333209	1	9
zmp_ph32	sa6115	si:ch211-168k14.2	ENSDARG00000056191	11	0.607118	1	7677	266	121	4	0.034649	0.0330579	0.0113691	1	9
zmp_ph32	sa6115	si:ch211-168k14.2	ENSDARG00000056191	12	0.296759	1	7677	286	121	6	0.0372541	0.0495868	0.0218125	1	9
zmp_ph32	sa6115	si:ch211-168k14.2	ENSDARG00000056191	13	0.948382	1	7677	294	121	2	0.0382962	0.0165289	0.00294474	1	9
zmp_ph32	sa6115	si:ch211-168k14.2	ENSDARG00000056191	14	0.863464	1	7677	305	121	3	0.0397291	0.0247934	0.00679112	1	9
zmp_ph32	sa6115	si:ch211-168k14.2	ENSDARG00000056191	15	0.325004	1	7677	239	121	5	0.031132	0.0413223	0.0164211	1	9
zmp_ph32	sa6115	si:ch211-168k14.2	ENSDARG00000056191	16	0.448145	1	7677	340	121	6	0.0442881	0.0495868	0.0218125	1	9
zmp_ph32	sa6115	si:ch211-168k14.2	ENSDARG00000056191	17	0.750575	1	7677	247	121	3	0.032174	0.0247934	0.00679112	1	9
zmp_ph32	sa6115	si:ch211-168k14.2	ENSDARG00000056191	18	0.762622	1	7677	252	121	3	0.0328253	0.0247934	0.00679112	1	9
zmp_ph32	sa6115	si:ch211-168k14.2	ENSDARG00000056191	19	0.355647	1	7677	366	121	7	0.0476749	0.0578512	0.0274631	1	9
zmp_ph32	sa6115	si:ch211-168k14.2	ENSDARG00000056191	20	0.145446	1	7677	327	121	8	0.0425948	0.0661157	0.0333209	1	9
zmp_ph32	sa6115	si:ch211-168k14.2	ENSDARG00000056191	21	0.118935	1	7677	311	121	8	0.0405106	0.0661157	0.0333209	1	9
zmp_ph32	sa6115	si:ch211-168k14.2	ENSDARG00000056191	22	0.887953	1	7677	235	121	2	0.0306109	0.0165289	0.00294474	1	9
zmp_ph32	sa6115	si:ch211-168k14.2	ENSDARG00000056191	23	0.74037	1	7677	317	121	4	0.0412922	0.0330579	0.0113691	1	9
zmp_ph32	sa6115	si:ch211-168k14.2	ENSDARG00000056191	24	0.859288	1	7677	217	121	2	0.0282662	0.0165289	0.00294474	1	9
zmp_ph32	sa6115	si:ch211-168k14.2	ENSDARG00000056191	25	0.12122	1	7677	213	121	6	0.0277452	0.0495868	0.0218125	1	9
zmp_ph35	sa7027/sa7028	vps16	ENSDARG00000059902	1	0.892511	1	15399	693	83	2	0.0450029	0.0240964	0.00429824	1	6
zmp_ph35	sa7027/sa7028	vps16	ENSDARG00000059902	2	0.744878	1	15399	713	83	3	0.0463017	0.0361446	0.00992288	1	6
zmp_ph35	sa7027/sa7028	vps16	ENSDARG00000059902	3	0.81513	1	15399	805	83	3	0.0522761	0.0361446	0.00992288	1	6
zmp_ph35	sa7027/sa7028	vps16	ENSDARG00000059902	4	0.566535	1	15399	545	83	3	0.0353919	0.0361446	0.00992288	1	6
zmp_ph35	sa7027/sa7028	vps16	ENSDARG00000059902	5	0.864979	1	15399	890	83	3	0.057796	0.0361446	0.00992288	1	6
zmp_ph35	sa7027/sa7028	vps16	ENSDARG00000059902	6	3.52934e-08	8.82335e-07	15399	708	83	18	0.045977	0.216867	0.145108	1	6
zmp_ph35	sa7027/sa7028	vps16	ENSDARG00000059902	7	0.987787	1	15399	796	83	1	0.0516917	0.0120482	0.000617801	1	6
zmp_ph35	sa7027/sa7028	vps16	ENSDARG00000059902	8	1	1	15399	651	83	0	0.0422755	0	0	1	6
zmp_ph35	sa7027/sa7028	vps16	ENSDARG00000059902	9	0.606758	1	15399	578	83	3	0.0375349	0.0361446	0.00992288	1	6
zmp_ph35	sa7027/sa7028	vps16	ENSDARG00000059902	10	0.952217	1	15399	554	83	1	0.0359764	0.0120482	0.000617801	1	6
zmp_ph35	sa7027/sa7028	vps16	ENSDARG00000059902	11	0.0726326	1	15399	542	83	6	0.0351971	0.0722892	0.0319484	1	6
zmp_ph35	sa7027/sa7028	vps16	ENSDARG00000059902	12	0.953011	1	15399	557	83	1	0.0361712	0.0120482	0.000617801	1	6
zmp_ph35	sa7027/sa7028	vps16	ENSDARG00000059902	13	0.63894	1	15399	606	83	3	0.0393532	0.0361446	0.00992288	1	6
zmp_ph35	sa7027/sa7028	vps16	ENSDARG00000059902	14	0.183796	1	15399	559	83	5	0.0363011	0.060241	0.0240342	1	6
zmp_ph35	sa7027/sa7028	vps16	ENSDARG00000059902	15	0.00263306	0.0658265	15399	543	83	9	0.035262	0.108434	0.0577456	1	6
zmp_ph35	sa7027/sa7028	vps16	ENSDARG00000059902	16	0.88764	1	15399	683	83	2	0.0443535	0.0240964	0.00429824	1	6
zmp_ph35	sa7027/sa7028	vps16	ENSDARG00000059902	17	0.958455	1	15399	579	83	1	0.0375998	0.0120482	0.000617801	1	6
zmp_ph35	sa7027/sa7028	vps16	ENSDARG00000059902	18	0.498494	1	15399	493	83	3	0.0320151	0.0361446	0.00992288	1	6
zmp_ph35	sa7027/sa7028	vps16	ENSDARG00000059902	19	0.866658	1	15399	644	83	2	0.0418209	0.0240964	0.00429824	1	6
zmp_ph35	sa7027/sa7028	vps16	ENSDARG00000059902	20	0.670328	1	15399	635	83	3	0.0412364	0.0361446	0.00992288	1	6
zmp_ph35	sa7027/sa7028	vps16	ENSDARG00000059902	21	0.3889	1	15399	586	83	4	0.0380544	0.0481928	0.0166269	1	6
zmp_ph35	sa7027/sa7028	vps16	ENSDARG00000059902	22	0.775556	1	15399	521	83	2	0.0338334	0.0240964	0.00429824	1	6
zmp_ph35	sa7027/sa7028	vps16	ENSDARG00000059902	23	0.842872	1	15399	606	83	2	0.0393532	0.0240964	0.00429824	1	6
zmp_ph35	sa7027/sa7028	vps16	ENSDARG00000059902	24	0.911324	1	15399	443	83	1	0.0287681	0.0120482	0.000617801	1	6
zmp_ph35	sa7027/sa7028	vps16	ENSDARG00000059902	25	0.723135	1	15399	469	83	2	0.0304565	0.0240964	0.00429824	1	6
zmp_ph40	sa18758	smarce1	ENSDARG00000016871	1	0.448563	1	7742	345	186	9	0.0445621	0.0483871	0.0254717	1	3
zmp_ph40	sa18758	smarce1	ENSDARG00000016871	2	0.890815	1	7742	375	186	6	0.0484371	0.0322581	0.0141398	1	3
zmp_ph40	sa18758	smarce1	ENSDARG00000016871	3	0.0984362	1	7742	432	186	15	0.0557995	0.0806452	0.0503666	1	3
zmp_ph40	sa18758	smarce1	ENSDARG00000016871	4	0.426058	1	7742	258	186	7	0.0333247	0.0376344	0.0177938	1	3
zmp_ph40	sa18758	smarce1	ENSDARG00000016871	5	0.480902	1	7742	437	186	11	0.0564454	0.0591398	0.0335162	1	3
zmp_ph40	sa18758	smarce1	ENSDARG00000016871	6	0.86393	1	7742	358	186	6	0.0462413	0.0322581	0.0141398	1	3
zmp_ph40	sa18758	smarce1	ENSDARG00000016871	7	0.497694	1	7742	401	186	10	0.0517954	0.0537634	0.0294551	1	3
zmp_ph40	sa18758	smarce1	ENSDARG00000016871	8	0.776731	1	7742	317	186	6	0.0409455	0.0322581	0.0141398	1	3
zmp_ph40	sa18758	smarce1	ENSDARG00000016871	9	0.0316176	0.79044	7742	271	186	12	0.0350039	0.0645161	0.0376452	1	3
zmp_ph40	sa18758	smarce1	ENSDARG00000016871	10	0.359904	1	7742	280	186	8	0.0361664	0.0430108	0.021579	1	3
zmp_ph40	sa18758	smarce1	ENSDARG00000016871	11	0.992591	1	7742	286	186	2	0.0369414	0.0107527	0.00191387	1	3
zmp_ph40	sa18758	smarce1	ENSDARG00000016871	12	0.381704	1	7742	286	186	8	0.0369414	0.0430108	0.021579	1	3
zmp_ph40	sa18758	smarce1	ENSDARG00000016871	13	0.932207	1	7742	300	186	4	0.0387497	0.0215054	0.00737834	1	3
zmp_ph40	sa18758	smarce1	ENSDARG00000016871	14	0.329282	1	7742	310	186	9	0.0400413	0.0483871	0.0254717	1	3
zmp_ph40	sa18758	smarce1	ENSDARG00000016871	15	0.394695	1	7742	250	186	7	0.0322914	0.0376344	0.0177938	1	3
zmp_ph40	sa18758	smarce1	ENSDARG00000016871	16	0.600309	1	7742	348	186	8	0.0449496	0.0430108	0.021579	1	3
zmp_ph40	sa18758	smarce1	ENSDARG00000016871	17	0.611175	1	7742	264	186	6	0.0340997	0.0322581	0.0141398	1	3
zmp_ph40	sa18758	smarce1	ENSDARG00000016871	18	0.982497	1	7742	246	186	2	0.0317747	0.0107527	0.00191387	1	3
zmp_ph40	sa18758	smarce1	ENSDARG00000016871	19	0.0315934	0.789836	7742	366	186	15	0.0472746	0.0806452	0.0503666	1	3
zmp_ph40	sa18758	smarce1	ENSDARG00000016871	20	0.786758	1	7742	321	186	6	0.0414622	0.0322581	0.0141398	1	3
zmp_ph40	sa18758	smarce1	ENSDARG00000016871	21	0.458184	1	7742	307	186	8	0.0396538	0.0430108	0.021579	1	3
zmp_ph40	sa18758	smarce1	ENSDARG00000016871	22	0.923353	1	7742	235	186	3	0.0303539	0.016129	0.00441025	1	3
zmp_ph40	sa18758	smarce1	ENSDARG00000016871	23	0.784283	1	7742	320	186	6	0.041333	0.0322581	0.0141398	1	3
zmp_ph40	sa18758	smarce1	ENSDARG00000016871	24	0.417687	1	7742	216	186	6	0.0278998	0.0322581	0.0141398	1	3
zmp_ph40	sa18758	smarce1	ENSDARG00000016871	25	0.404887	1	7742	213	186	6	0.0275123	0.0322581	0.0141398	1	3
zmp_ph42	sa9839	meis1	ENSDARG00000012078	1	0.231562	1	3540	146	100	6	0.0412429	0.06	0.0264497	1	13
zmp_ph42	sa9839	meis1	ENSDARG00000012078	2	0.506471	1	3540	166	100	5	0.0468927	0.05	0.0199056	1	13
zmp_ph42	sa9839	meis1	ENSDARG00000012078	3	0.108071	1	3540	227	100	10	0.0641243	0.1	0.0552632	1	13
zmp_ph42	sa9839	meis1	ENSDARG00000012078	4	0.984737	1	3540	145	100	1	0.0409605	0.01	0.000512801	1	13
zmp_ph42	sa9839	meis1	ENSDARG00000012078	5	0.618112	1	3540	188	100	5	0.0531073	0.05	0.0199056	1	13
zmp_ph42	sa9839	meis1	ENSDARG00000012078	6	0.76171	1	3540	182	100	4	0.0514124	0.04	0.0137766	1	13
zmp_ph42	sa9839	meis1	ENSDARG00000012078	7	0.328349	1	3540	166	100	6	0.0468927	0.06	0.0264497	1	13
zmp_ph42	sa9839	meis1	ENSDARG00000012078	8	0.158434	1	3540	129	100	6	0.0364407	0.06	0.0264497	1	13
zmp_ph42	sa9839	meis1	ENSDARG00000012078	9	0.893484	1	3540	133	100	2	0.0375706	0.02	0.00356515	1	13
zmp_ph42	sa9839	meis1	ENSDARG00000012078	10	0.913652	1	3540	142	100	2	0.040113	0.02	0.00356515	1	13
zmp_ph42	sa9839	meis1	ENSDARG00000012078	11	0.496632	1	3540	129	100	4	0.0364407	0.04	0.0137766	1	13
zmp_ph42	sa9839	meis1	ENSDARG00000012078	12	0.824818	1	3540	111	100	2	0.0313559	0.02	0.00356515	1	13
zmp_ph42	sa9839	meis1	ENSDARG00000012078	13	0.51472	1	3540	132	100	4	0.0372881	0.04	0.0137766	1	13
zmp_ph42	sa9839	meis1	ENSDARG00000012078	14	1	1	3540	127	100	0	0.0358757	0	0	1	13
zmp_ph42	sa9839	meis1	ENSDARG00000012078	15	0.311765	1	3540	131	100	5	0.0370056	0.05	0.0199056	1	13
zmp_ph42	sa9839	meis1	ENSDARG00000012078	16	0.00443579	0.110895	3540	155	100	11	0.0437853	0.11	0.0629246	1	13
zmp_ph42	sa9839	meis1	ENSDARG00000012078	17	0.959844	1	3540	112	100	1	0.0316384	0.01	0.000512801	1	13
zmp_ph42	sa9839	meis1	ENSDARG00000012078	18	0.804528	1	3540	106	100	2	0.0299435	0.02	0.00356515	1	13
zmp_ph42	sa9839	meis1	ENSDARG00000012078	19	0.947735	1	3540	163	100	2	0.0460452	0.02	0.00356515	1	13
zmp_ph42	sa9839	meis1	ENSDARG00000012078	20	0.811712	1	3540	153	100	3	0.0432203	0.03	0.00822583	1	13
zmp_ph42	sa9839	meis1	ENSDARG00000012078	21	0.250195	1	3540	150	100	6	0.0423729	0.06	0.0264497	1	13
zmp_ph42	sa9839	meis1	ENSDARG00000012078	22	0.0889008	1	3540	109	100	6	0.030791	0.06	0.0264497	1	13
zmp_ph42	sa9839	meis1	ENSDARG00000012078	23	0.893484	1	3540	133	100	2	0.0375706	0.02	0.00356515	1	13
zmp_ph42	sa9839	meis1	ENSDARG00000012078	24	0.552711	1	3540	102	100	3	0.0288136	0.03	0.00822583	1	13
zmp_ph42	sa9839	meis1	ENSDARG00000012078	25	0.791388	1	3540	103	100	2	0.029096	0.02	0.00356515	1	13
zmp_ph44	sa5902	CDAN1	ENSDARG00000042261	1	0.684146	1	8557	380	372	15	0.0444081	0.0403226	0.025017	1	17
zmp_ph44	sa5902	CDAN1	ENSDARG00000042261	2	0.0919083	1	8557	412	372	24	0.0481477	0.0645161	0.0448815	1	17
zmp_ph44	sa5902	CDAN1	ENSDARG00000042261	3	0.492182	1	8557	473	372	21	0.0552764	0.0564516	0.0381357	1	17
zmp_ph44	sa5902	CDAN1	ENSDARG00000042261	4	0.98574	1	8557	286	372	6	0.0334229	0.016129	0.00704692	1	17
zmp_ph44	sa5902	CDAN1	ENSDARG00000042261	5	0.299112	1	8557	467	372	23	0.0545752	0.061828	0.0426215	1	17
zmp_ph44	sa5902	CDAN1	ENSDARG00000042261	6	0.327089	1	8557	409	372	20	0.0477971	0.0537634	0.0359114	1	17
zmp_ph44	sa5902	CDAN1	ENSDARG00000042261	7	0.78611	1	8557	435	372	16	0.0508356	0.0430108	0.0271613	1	17
zmp_ph44	sa5902	CDAN1	ENSDARG00000042261	8	0.845236	1	8557	354	372	12	0.0413696	0.0322581	0.0187167	1	17
zmp_ph44	sa5902	CDAN1	ENSDARG00000042261	9	0.00101168	0.0252919	8557	305	372	26	0.0356433	0.0698925	0.0494323	1	17
zmp_ph44	sa5902	CDAN1	ENSDARG00000042261	10	0.872914	1	8557	312	372	10	0.0364614	0.0268817	0.0146552	1	17
zmp_ph44	sa5902	CDAN1	ENSDARG00000042261	11	0.990773	1	8557	301	372	6	0.0351759	0.016129	0.00704692	1	17
zmp_ph44	sa5902	CDAN1	ENSDARG00000042261	12	0.0992414	1	8557	316	372	19	0.0369288	0.0510753	0.0337007	1	17
zmp_ph44	sa5902	CDAN1	ENSDARG00000042261	13	0.789882	1	8557	335	372	12	0.0391492	0.0322581	0.0187167	1	17
zmp_ph44	sa5902	CDAN1	ENSDARG00000042261	14	0.851232	1	8557	330	372	11	0.0385649	0.0295699	0.0166697	1	17
zmp_ph44	sa5902	CDAN1	ENSDARG00000042261	15	0.142377	1	8557	293	372	17	0.034241	0.0456989	0.0293244	1	17
zmp_ph44	sa5902	CDAN1	ENSDARG00000042261	16	0.672546	1	8557	377	372	15	0.0440575	0.0403226	0.025017	1	17
zmp_ph44	sa5902	CDAN1	ENSDARG00000042261	17	0.00444661	0.111165	8557	306	372	24	0.0357602	0.0645161	0.0448815	1	17
zmp_ph44	sa5902	CDAN1	ENSDARG00000042261	18	0.998505	1	8557	285	372	4	0.0333061	0.0107527	0.003681	1	17
zmp_ph44	sa5902	CDAN1	ENSDARG00000042261	19	0.839861	1	8557	378	372	13	0.0441744	0.0349462	0.0207923	1	17
zmp_ph44	sa5902	CDAN1	ENSDARG00000042261	20	0.640563	1	8557	345	372	14	0.0403179	0.0376344	0.0228932	1	17
zmp_ph44	sa5902	CDAN1	ENSDARG00000042261	21	0.853815	1	8557	331	372	11	0.0386818	0.0295699	0.0166697	1	17
zmp_ph44	sa5902	CDAN1	ENSDARG00000042261	22	0.851986	1	8557	277	372	9	0.0323712	0.0241935	0.0126782	1	17
zmp_ph44	sa5902	CDAN1	ENSDARG00000042261	23	0.81766	1	8557	344	372	12	0.040201	0.0322581	0.0187167	1	17
zmp_ph44	sa5902	CDAN1	ENSDARG00000042261	24	0.145749	1	8557	254	372	15	0.0296833	0.0403226	0.025017	1	17
zmp_ph44	sa5902	CDAN1	ENSDARG00000042261	25	0.05161	1	8557	252	372	17	0.0294496	0.0456989	0.0293244	1	17
zmp_ph45	sa659	pla2g12b	ENSDARG00000015662	1	1	1	9432	428	17	0	0.0453774	0	0	1	13
zmp_ph45	sa659	pla2g12b	ENSDARG00000015662	2	0.566877	1	9432	453	17	1	0.048028	0.0588235	0.00301271	1	13
zmp_ph45	sa659	pla2g12b	ENSDARG00000015662	3	0.615739	1	9432	516	17	1	0.0547074	0.0588235	0.00301271	1	13
zmp_ph45	sa659	pla2g12b	ENSDARG00000015662	4	1	1	9432	297	17	0	0.0314885	0	0	1	13
zmp_ph45	sa659	pla2g12b	ENSDARG00000015662	5	0.0611849	1	9432	511	17	3	0.0541773	0.176471	0.0498982	1	13
zmp_ph45	sa659	pla2g12b	ENSDARG00000015662	6	1	1	9432	437	17	0	0.0463316	0	0	1	13
zmp_ph45	sa659	pla2g12b	ENSDARG00000015662	7	1	1	9432	491	17	0	0.0520568	0	0	1	13
zmp_ph45	sa659	pla2g12b	ENSDARG00000015662	8	1	1	9432	399	17	0	0.0423028	0	0	1	13
zmp_ph45	sa659	pla2g12b	ENSDARG00000015662	9	0.440759	1	9432	317	17	1	0.033609	0.0588235	0.00301271	1	13
zmp_ph45	sa659	pla2g12b	ENSDARG00000015662	10	0.1267	1	9432	345	17	2	0.0365776	0.117647	0.0213176	1	13
zmp_ph45	sa659	pla2g12b	ENSDARG00000015662	11	1	1	9432	352	17	0	0.0373198	0	0	1	13
zmp_ph45	sa659	pla2g12b	ENSDARG00000015662	12	1	1	9432	350	17	0	0.0371077	0	0	1	13
zmp_ph45	sa659	pla2g12b	ENSDARG00000015662	13	0.0311261	0.778154	9432	390	17	3	0.0413486	0.176471	0.0498982	1	13
zmp_ph45	sa659	pla2g12b	ENSDARG00000015662	14	0.481047	1	9432	357	17	1	0.0378499	0.0588235	0.00301271	1	13
zmp_ph45	sa659	pla2g12b	ENSDARG00000015662	15	0.438669	1	9432	315	17	1	0.0333969	0.0588235	0.00301271	1	13
zmp_ph45	sa659	pla2g12b	ENSDARG00000015662	16	0.531999	1	9432	412	17	1	0.0436811	0.0588235	0.00301271	1	13
zmp_ph45	sa659	pla2g12b	ENSDARG00000015662	17	0.463268	1	9432	339	17	1	0.0359415	0.0588235	0.00301271	1	13
zmp_ph45	sa659	pla2g12b	ENSDARG00000015662	18	1	1	9432	304	17	0	0.0322307	0	0	1	13
zmp_ph45	sa659	pla2g12b	ENSDARG00000015662	19	1	1	9432	421	17	0	0.0446353	0	0	1	13
zmp_ph45	sa659	pla2g12b	ENSDARG00000015662	20	1	1	9432	404	17	0	0.0428329	0	0	1	13
zmp_ph45	sa659	pla2g12b	ENSDARG00000015662	21	1	1	9432	370	17	0	0.0392282	0	0	1	13
zmp_ph45	sa659	pla2g12b	ENSDARG00000015662	22	0.421685	1	9432	299	17	1	0.0317006	0.0588235	0.00301271	1	13
zmp_ph45	sa659	pla2g12b	ENSDARG00000015662	23	1	1	9432	379	17	0	0.0401824	0	0	1	13
zmp_ph45	sa659	pla2g12b	ENSDARG00000015662	24	1	1	9432	271	17	0	0.028732	0	0	1	13
zmp_ph45	sa659	pla2g12b	ENSDARG00000015662	25	0.3953	1	9432	275	17	1	0.0291561	0.0588235	0.00301271	1	13
zmp_ph46	sa2042	GPAA1	ENSDARG00000074571	1	0.42716	1	8281	348	449	20	0.0420239	0.0445434	0.0297124	1	2
zmp_ph46	sa2042	GPAA1	ENSDARG00000074571	2	0.233401	1	8281	410	449	26	0.0495109	0.0579065	0.0408887	1	2
zmp_ph46	sa2042	GPAA1	ENSDARG00000074571	3	0.112222	1	8281	470	449	32	0.0567564	0.0712695	0.0523438	1	2
zmp_ph46	sa2042	GPAA1	ENSDARG00000074571	4	0.598729	1	8281	269	449	14	0.032484	0.0311804	0.018947	1	2
zmp_ph46	sa2042	GPAA1	ENSDARG00000074571	5	0.943308	1	8281	460	449	18	0.0555488	0.0400891	0.0260687	1	2
zmp_ph46	sa2042	GPAA1	ENSDARG00000074571	6	0.145234	1	8281	400	449	27	0.0483033	0.0601336	0.0427809	1	2
zmp_ph46	sa2042	GPAA1	ENSDARG00000074571	7	0.992342	1	8281	425	449	13	0.0513223	0.0289532	0.0172091	1	2
zmp_ph46	sa2042	GPAA1	ENSDARG00000074571	8	0.953532	1	8281	336	449	12	0.0405748	0.0267261	0.0154921	1	2
zmp_ph46	sa2042	GPAA1	ENSDARG00000074571	9	0.874527	1	8281	294	449	12	0.035503	0.0267261	0.0154921	1	2
zmp_ph46	sa2042	GPAA1	ENSDARG00000074571	10	0.614196	1	8281	310	449	16	0.0374351	0.0356347	0.022477	1	2
zmp_ph46	sa2042	GPAA1	ENSDARG00000074571	11	0.684804	1	8281	305	449	15	0.0368313	0.0334076	0.0207036	1	2
zmp_ph46	sa2042	GPAA1	ENSDARG00000074571	12	0.318059	1	8281	291	449	18	0.0351407	0.0400891	0.0260687	1	2
zmp_ph46	sa2042	GPAA1	ENSDARG00000074571	13	0.965162	1	8281	324	449	11	0.0391257	0.0244989	0.0137986	1	2
zmp_ph46	sa2042	GPAA1	ENSDARG00000074571	14	0.0554661	1	8281	311	449	24	0.0375559	0.0534521	0.0371275	1	2
zmp_ph46	sa2042	GPAA1	ENSDARG00000074571	15	0.615184	1	8281	272	449	14	0.0328463	0.0311804	0.018947	1	2
zmp_ph46	sa2042	GPAA1	ENSDARG00000074571	16	0.15512	1	8281	370	449	25	0.0446806	0.0556793	0.039004	1	2
zmp_ph46	sa2042	GPAA1	ENSDARG00000074571	17	0.972479	1	8281	285	449	9	0.0344161	0.0200445	0.0104959	1	2
zmp_ph46	sa2042	GPAA1	ENSDARG00000074571	18	0.88125	1	8281	275	449	11	0.0332085	0.0244989	0.0137986	1	2
zmp_ph46	sa2042	GPAA1	ENSDARG00000074571	19	0.378551	1	8281	374	449	22	0.0451636	0.0489978	0.0334005	1	2
zmp_ph46	sa2042	GPAA1	ENSDARG00000074571	20	0.42716	1	8281	348	449	20	0.0420239	0.0445434	0.0297124	1	2
zmp_ph46	sa2042	GPAA1	ENSDARG00000074571	21	0.152793	1	8281	336	449	23	0.0405748	0.0512249	0.0352595	1	2
zmp_ph46	sa2042	GPAA1	ENSDARG00000074571	22	0.110279	1	8281	257	449	19	0.0310349	0.0423163	0.0278846	1	2
zmp_ph46	sa2042	GPAA1	ENSDARG00000074571	23	0.569218	1	8281	339	449	18	0.0409371	0.0400891	0.0260687	1	2
zmp_ph46	sa2042	GPAA1	ENSDARG00000074571	24	0.104066	1	8281	239	449	18	0.0288612	0.0400891	0.0260687	1	2
zmp_ph46	sa2042	GPAA1	ENSDARG00000074571	25	0.611116	1	8281	233	449	12	0.0281367	0.0267261	0.0154921	1	2
zmp_ph48	sa2681	rps24	ENSDARG00000039347	1	0.66339	1	16404	750	4340	193	0.0457206	0.04447	0.0394367	1	13
zmp_ph48	sa2681	rps24	ENSDARG00000039347	2	0.508534	1	16404	786	4340	208	0.0479151	0.0479263	0.0427046	1	13
zmp_ph48	sa2681	rps24	ENSDARG00000039347	3	0.0947034	1	16404	844	4340	243	0.0514509	0.0559908	0.0503582	1	13
zmp_ph48	sa2681	rps24	ENSDARG00000039347	4	0.407259	1	16404	615	4340	166	0.0374909	0.0382488	0.0335768	1	13
zmp_ph48	sa2681	rps24	ENSDARG00000039347	5	0.478988	1	16404	933	4340	248	0.0568764	0.0571429	0.0514544	1	13
zmp_ph48	sa2681	rps24	ENSDARG00000039347	6	0.0574909	1	16404	747	4340	220	0.0455377	0.0506912	0.0453244	1	13
zmp_ph48	sa2681	rps24	ENSDARG00000039347	7	0.583721	1	16404	838	4340	219	0.0510851	0.0504608	0.0451059	1	13
zmp_ph48	sa2681	rps24	ENSDARG00000039347	8	0.685819	1	16404	711	4340	182	0.0433431	0.0419355	0.0370457	1	13
zmp_ph48	sa2681	rps24	ENSDARG00000039347	9	0.840806	1	16404	620	4340	152	0.0377957	0.035023	0.0305514	1	13
zmp_ph48	sa2681	rps24	ENSDARG00000039347	10	0.536199	1	16404	566	4340	149	0.0345038	0.0343318	0.0299044	1	13
zmp_ph48	sa2681	rps24	ENSDARG00000039347	11	0.0337477	0.843692	16404	571	4340	174	0.0348086	0.0400922	0.0353098	1	13
zmp_ph48	sa2681	rps24	ENSDARG00000039347	12	0.848985	1	16404	602	4340	147	0.0366984	0.033871	0.0294734	1	13
zmp_ph48	sa2681	rps24	ENSDARG00000039347	13	0.0934121	1	16404	630	4340	184	0.0384053	0.0423963	0.03748	1	13
zmp_ph48	sa2681	rps24	ENSDARG00000039347	14	0.365373	1	16404	580	4340	158	0.0353572	0.0364055	0.0318468	1	13
zmp_ph48	sa2681	rps24	ENSDARG00000039347	15	0.961468	1	16404	589	4340	135	0.0359059	0.031106	0.026892	1	13
zmp_ph48	sa2681	rps24	ENSDARG00000039347	16	0.910398	1	16404	724	4340	174	0.0441356	0.0400922	0.0353098	1	13
zmp_ph48	sa2681	rps24	ENSDARG00000039347	17	0.79869	1	16404	624	4340	155	0.0380395	0.0357143	0.0311989	1	13
zmp_ph48	sa2681	rps24	ENSDARG00000039347	18	0.946073	1	16404	529	4340	122	0.0322482	0.0281106	0.0241058	1	13
zmp_ph48	sa2681	rps24	ENSDARG00000039347	19	0.246311	1	16404	664	4340	185	0.0404779	0.0426267	0.0376973	1	13
zmp_ph48	sa2681	rps24	ENSDARG00000039347	20	0.826878	1	16404	676	4340	167	0.0412095	0.0384793	0.0337933	1	13
zmp_ph48	sa2681	rps24	ENSDARG00000039347	21	0.0460706	1	16404	613	4340	184	0.0373689	0.0423963	0.03748	1	13
zmp_ph48	sa2681	rps24	ENSDARG00000039347	22	0.485449	1	16404	564	4340	150	0.0343819	0.0345622	0.03012	1	13
zmp_ph48	sa2681	rps24	ENSDARG00000039347	23	0.715815	1	16404	646	4340	164	0.0393806	0.037788	0.033144	1	13
zmp_ph48	sa2681	rps24	ENSDARG00000039347	24	0.329374	1	16404	479	4340	132	0.0292002	0.0304147	0.026248	1	13
zmp_ph48	sa2681	rps24	ENSDARG00000039347	25	0.652293	1	16404	503	4340	129	0.0306633	0.0297235	0.0256046	1	13
zmp_ph51	sa365	slc22a7b	ENSDARG00000056643	1	0.956796	1	10140	453	238	6	0.0446746	0.0252101	0.0110347	1	17
zmp_ph51	sa365	slc22a7b	ENSDARG00000056643	2	0.875025	1	10140	477	238	8	0.0470414	0.0336134	0.0168337	1	17
zmp_ph51	sa365	slc22a7b	ENSDARG00000056643	3	0.387571	1	10140	539	238	14	0.0531558	0.0588235	0.0359094	1	17
zmp_ph51	sa365	slc22a7b	ENSDARG00000056643	4	0.351556	1	10140	324	238	9	0.0319527	0.0378151	0.0198669	1	17
zmp_ph51	sa365	slc22a7b	ENSDARG00000056643	5	0.0672067	1	10140	593	238	20	0.0584813	0.0840336	0.0563853	1	17
zmp_ph51	sa365	slc22a7b	ENSDARG00000056643	6	0.982836	1	10140	454	238	5	0.0447732	0.0210084	0.00831354	1	17
zmp_ph51	sa365	slc22a7b	ENSDARG00000056643	7	0.757549	1	10140	508	238	10	0.0500986	0.0420168	0.0229699	1	17
zmp_ph51	sa365	slc22a7b	ENSDARG00000056643	8	0.772386	1	10140	420	238	8	0.0414201	0.0336134	0.0168337	1	17
zmp_ph51	sa365	slc22a7b	ENSDARG00000056643	9	0.936843	1	10140	370	238	5	0.0364892	0.0210084	0.00831354	1	17
zmp_ph51	sa365	slc22a7b	ENSDARG00000056643	10	0.635806	1	10140	368	238	8	0.0362919	0.0336134	0.0168337	1	17
zmp_ph51	sa365	slc22a7b	ENSDARG00000056643	11	0.653621	1	10140	374	238	8	0.0368836	0.0336134	0.0168337	1	17
zmp_ph51	sa365	slc22a7b	ENSDARG00000056643	12	0.953776	1	10140	391	238	5	0.0385602	0.0210084	0.00831354	1	17
zmp_ph51	sa365	slc22a7b	ENSDARG00000056643	13	0.706601	1	10140	393	238	8	0.0387574	0.0336134	0.0168337	1	17
zmp_ph51	sa365	slc22a7b	ENSDARG00000056643	14	0.230312	1	10140	399	238	12	0.0393491	0.0504202	0.0293473	1	17
zmp_ph51	sa365	slc22a7b	ENSDARG00000056643	15	0.896183	1	10140	335	238	5	0.0330375	0.0210084	0.00831354	1	17
zmp_ph51	sa365	slc22a7b	ENSDARG00000056643	16	0.759986	1	10140	462	238	9	0.0455621	0.0378151	0.0198669	1	17
zmp_ph51	sa365	slc22a7b	ENSDARG00000056643	17	7.51461e-17	1.87865e-15	10140	360	238	41	0.035503	0.172269	0.133135	1	17
zmp_ph51	sa365	slc22a7b	ENSDARG00000056643	18	0.820171	1	10140	344	238	6	0.033925	0.0252101	0.0110347	1	17
zmp_ph51	sa365	slc22a7b	ENSDARG00000056643	19	0.739632	1	10140	453	238	9	0.0446746	0.0378151	0.0198669	1	17
zmp_ph51	sa365	slc22a7b	ENSDARG00000056643	20	0.197539	1	10140	423	238	13	0.041716	0.0546218	0.0326079	1	17
zmp_ph51	sa365	slc22a7b	ENSDARG00000056643	21	0.321914	1	10140	394	238	11	0.038856	0.0462185	0.0261326	1	17
zmp_ph51	sa365	slc22a7b	ENSDARG00000056643	22	0.742844	1	10140	312	238	6	0.0307692	0.0252101	0.0110347	1	17
zmp_ph51	sa365	slc22a7b	ENSDARG00000056643	23	0.861296	1	10140	417	238	7	0.0411243	0.0294118	0.0138835	1	17
zmp_ph51	sa365	slc22a7b	ENSDARG00000056643	24	0.991089	1	10140	285	238	2	0.0281065	0.00840336	0.00149514	1	17
zmp_ph51	sa365	slc22a7b	ENSDARG00000056643	25	0.968641	1	10140	292	238	3	0.0287968	0.012605	0.00344425	1	17
zmp_ph54	sa6166	megf10	ENSDARG00000017229	1	0.80798	1	14849	680	4605	199	0.0457943	0.0432139	0.0383927	1	10
zmp_ph54	sa6166	megf10	ENSDARG00000017229	2	0.105647	1	14849	698	4605	235	0.0470065	0.0510315	0.0458011	1	10
zmp_ph54	sa6166	megf10	ENSDARG00000017229	3	0.392801	1	14849	782	4605	247	0.0526635	0.0536374	0.0482787	1	10
zmp_ph54	sa6166	megf10	ENSDARG00000017229	4	0.0264477	0.661192	14849	510	4605	183	0.0343457	0.0397394	0.0351136	1	10
zmp_ph54	sa6166	megf10	ENSDARG00000017229	5	0.664428	1	14849	836	4605	253	0.0563001	0.0549403	0.0495189	1	10
zmp_ph54	sa6166	megf10	ENSDARG00000017229	6	0.699252	1	14849	687	4605	206	0.0462657	0.044734	0.03983	1	10
zmp_ph54	sa6166	megf10	ENSDARG00000017229	7	0.19673	1	14849	776	4605	254	0.0522594	0.0551574	0.0497257	1	10
zmp_ph54	sa6166	megf10	ENSDARG00000017229	8	0.769571	1	14849	621	4605	183	0.041821	0.0397394	0.0351136	1	10
zmp_ph54	sa6166	megf10	ENSDARG00000017229	9	0.818175	1	14849	562	4605	163	0.0378477	0.0353963	0.0310288	1	10
zmp_ph54	sa6166	megf10	ENSDARG00000017229	10	0.154435	1	14849	531	4605	178	0.03576	0.0386536	0.0340908	1	10
zmp_ph54	sa6166	megf10	ENSDARG00000017229	11	0.456183	1	14849	504	4605	158	0.0339417	0.0343105	0.0300103	1	10
zmp_ph54	sa6166	megf10	ENSDARG00000017229	12	0.745606	1	14849	545	4605	161	0.0367028	0.034962	0.0306212	1	10
zmp_ph54	sa6166	megf10	ENSDARG00000017229	13	0.893161	1	14849	583	4605	165	0.0392619	0.0358306	0.0314365	1	10
zmp_ph54	sa6166	megf10	ENSDARG00000017229	14	0.688368	1	14849	538	4605	161	0.0362314	0.034962	0.0306212	1	10
zmp_ph54	sa6166	megf10	ENSDARG00000017229	15	0.807309	1	14849	527	4605	153	0.0354906	0.0332248	0.028993	1	10
zmp_ph54	sa6166	megf10	ENSDARG00000017229	16	0.75345	1	14849	655	4605	194	0.0441107	0.0421281	0.037367	1	10
zmp_ph54	sa6166	megf10	ENSDARG00000017229	17	0.905024	1	14849	569	4605	160	0.0383191	0.0347448	0.0304175	1	10
zmp_ph54	sa6166	megf10	ENSDARG00000017229	18	0.73585	1	14849	481	4605	142	0.0323928	0.030836	0.0267594	1	10
zmp_ph54	sa6166	megf10	ENSDARG00000017229	19	0.587939	1	14849	631	4605	193	0.0424944	0.041911	0.0371619	1	10
zmp_ph54	sa6166	megf10	ENSDARG00000017229	20	0.776885	1	14849	632	4605	186	0.0425618	0.0403909	0.0357277	1	10
zmp_ph54	sa6166	megf10	ENSDARG00000017229	21	0.122293	1	14849	553	4605	187	0.0372416	0.040608	0.0359325	1	10
zmp_ph54	sa6166	megf10	ENSDARG00000017229	22	0.519399	1	14849	478	4605	148	0.0321907	0.032139	0.0279769	1	10
zmp_ph54	sa6166	megf10	ENSDARG00000017229	23	0.161492	1	14849	582	4605	194	0.0391946	0.0421281	0.037367	1	10
zmp_ph54	sa6166	megf10	ENSDARG00000017229	24	0.162094	1	14849	436	4605	147	0.0293622	0.0319218	0.0277739	1	10
zmp_ph54	sa6166	megf10	ENSDARG00000017229	25	0.110756	1	14849	452	4605	155	0.0304398	0.0336591	0.0293997	1	10
zmp_ph55	sa7108	dhx15	ENSDARG00000015392	1	0.122483	1	15003	686	3501	175	0.0457242	0.0499857	0.0440656	1	7
zmp_ph55	sa7108	dhx15	ENSDARG00000015392	2	0.530511	1	15003	714	3501	166	0.0475905	0.047415	0.0416464	1	7
zmp_ph55	sa7108	dhx15	ENSDARG00000015392	3	0.173118	1	15003	793	3501	198	0.0528561	0.0565553	0.0502675	1	7
zmp_ph55	sa7108	dhx15	ENSDARG00000015392	4	0.927997	1	15003	551	3501	113	0.036726	0.0322765	0.0275127	1	7
zmp_ph55	sa7108	dhx15	ENSDARG00000015392	5	0.662326	1	15003	850	3501	193	0.0566553	0.0551271	0.0489171	1	7
zmp_ph55	sa7108	dhx15	ENSDARG00000015392	6	0.563285	1	15003	684	3501	158	0.0455909	0.04513	0.0395	1	7
zmp_ph55	sa7108	dhx15	ENSDARG00000015392	7	0.000638186	0.0159546	15003	787	3501	228	0.0524562	0.0651243	0.0583932	1	7
zmp_ph55	sa7108	dhx15	ENSDARG00000015392	8	0.333517	1	15003	649	3501	157	0.043258	0.0448443	0.039232	1	7
zmp_ph55	sa7108	dhx15	ENSDARG00000015392	9	0.183284	1	15003	563	3501	142	0.0375258	0.0405598	0.0352198	1	7
zmp_ph55	sa7108	dhx15	ENSDARG00000015392	10	0.868396	1	15003	539	3501	114	0.0359261	0.0325621	0.0277772	1	7
zmp_ph55	sa7108	dhx15	ENSDARG00000015392	11	0.454105	1	15003	516	3501	122	0.0343931	0.0348472	0.0298966	1	7
zmp_ph55	sa7108	dhx15	ENSDARG00000015392	12	0.428241	1	15003	547	3501	130	0.0364594	0.0371322	0.0320219	1	7
zmp_ph55	sa7108	dhx15	ENSDARG00000015392	13	0.815986	1	15003	582	3501	126	0.0387922	0.0359897	0.0309585	1	7
zmp_ph55	sa7108	dhx15	ENSDARG00000015392	14	0.908162	1	15003	531	3501	110	0.0353929	0.0314196	0.0267199	1	7
zmp_ph55	sa7108	dhx15	ENSDARG00000015392	15	0.505713	1	15003	522	3501	122	0.034793	0.0348472	0.0298966	1	7
zmp_ph55	sa7108	dhx15	ENSDARG00000015392	16	0.597294	1	15003	667	3501	153	0.0444578	0.0437018	0.0381606	1	7
zmp_ph55	sa7108	dhx15	ENSDARG00000015392	17	0.983584	1	15003	575	3501	111	0.0383257	0.0317052	0.0269841	1	7
zmp_ph55	sa7108	dhx15	ENSDARG00000015392	18	0.897001	1	15003	478	3501	99	0.0318603	0.0282776	0.0238215	1	7
zmp_ph55	sa7108	dhx15	ENSDARG00000015392	19	0.0913954	1	15003	616	3501	160	0.0410585	0.0457012	0.0400363	1	7
zmp_ph55	sa7108	dhx15	ENSDARG00000015392	20	0.840818	1	15003	627	3501	135	0.0417916	0.0385604	0.033353	1	7
zmp_ph55	sa7108	dhx15	ENSDARG00000015392	21	0.146203	1	15003	560	3501	143	0.0373259	0.0408455	0.0354868	1	7
zmp_ph55	sa7108	dhx15	ENSDARG00000015392	22	0.877736	1	15003	487	3501	102	0.0324602	0.0291345	0.0246106	1	7
zmp_ph55	sa7108	dhx15	ENSDARG00000015392	23	0.100988	1	15003	578	3501	150	0.0385256	0.0428449	0.0373577	1	7
zmp_ph55	sa7108	dhx15	ENSDARG00000015392	24	0.717789	1	15003	443	3501	98	0.0295274	0.027992	0.0235587	1	7
zmp_ph55	sa7108	dhx15	ENSDARG00000015392	25	0.869066	1	15003	458	3501	96	0.0305272	0.0274207	0.0230335	1	7
zmp_ph56	sa3636	copb1	ENSDARG00000056557	1	0.909215	1	8004	377	601	22	0.0471014	0.0366057	0.0249092	1	7
zmp_ph56	sa3636	copb1	ENSDARG00000056557	2	0.642476	1	8004	380	601	27	0.0474763	0.0449251	0.0318967	1	7
zmp_ph56	sa3636	copb1	ENSDARG00000056557	3	0.0219928	0.54982	8004	426	601	44	0.0532234	0.0732113	0.0564962	1	7
zmp_ph56	sa3636	copb1	ENSDARG00000056557	4	0.584779	1	8004	288	601	21	0.035982	0.0349418	0.0235313	1	7
zmp_ph56	sa3636	copb1	ENSDARG00000056557	5	0.11025	1	8004	471	601	43	0.0588456	0.0715474	0.0550227	1	7
zmp_ph56	sa3636	copb1	ENSDARG00000056557	6	0.255824	1	8004	388	601	33	0.0484758	0.0549085	0.0404549	1	7
zmp_ph56	sa3636	copb1	ENSDARG00000056557	7	2.55827e-06	6.39567e-05	8004	394	601	57	0.0492254	0.0948419	0.0758661	1	7
zmp_ph56	sa3636	copb1	ENSDARG00000056557	8	0.51026	1	8004	330	601	25	0.0412294	0.0415973	0.0290836	1	7
zmp_ph56	sa3636	copb1	ENSDARG00000056557	9	0.991945	1	8004	289	601	12	0.0361069	0.0199667	0.0115605	1	7
zmp_ph56	sa3636	copb1	ENSDARG00000056557	10	0.835054	1	8004	278	601	17	0.0347326	0.0282862	0.0181018	1	7
zmp_ph56	sa3636	copb1	ENSDARG00000056557	11	0.835054	1	8004	278	601	17	0.0347326	0.0282862	0.0181018	1	7
zmp_ph56	sa3636	copb1	ENSDARG00000056557	12	0.14712	1	8004	301	601	28	0.0376062	0.046589	0.0333114	1	7
zmp_ph56	sa3636	copb1	ENSDARG00000056557	13	0.417245	1	8004	315	601	25	0.0393553	0.0415973	0.0290836	1	7
zmp_ph56	sa3636	copb1	ENSDARG00000056557	14	0.829076	1	8004	306	601	19	0.0382309	0.031614	0.0207989	1	7
zmp_ph56	sa3636	copb1	ENSDARG00000056557	15	0.963589	1	8004	250	601	12	0.0312344	0.0199667	0.0115605	1	7
zmp_ph56	sa3636	copb1	ENSDARG00000056557	16	0.482401	1	8004	352	601	27	0.043978	0.0449251	0.0318967	1	7
zmp_ph56	sa3636	copb1	ENSDARG00000056557	17	0.300599	1	8004	283	601	24	0.0353573	0.0399334	0.0276858	1	7
zmp_ph56	sa3636	copb1	ENSDARG00000056557	18	0.71054	1	8004	267	601	18	0.0333583	0.0299501	0.0194456	1	7
zmp_ph56	sa3636	copb1	ENSDARG00000056557	19	0.656217	1	8004	355	601	25	0.0443528	0.0415973	0.0290836	1	7
zmp_ph56	sa3636	copb1	ENSDARG00000056557	20	0.670966	1	8004	330	601	23	0.0412294	0.0382696	0.0262941	1	7
zmp_ph56	sa3636	copb1	ENSDARG00000056557	21	0.847926	1	8004	311	601	19	0.0388556	0.031614	0.0207989	1	7
zmp_ph56	sa3636	copb1	ENSDARG00000056557	22	0.66264	1	8004	259	601	18	0.0323588	0.0299501	0.0194456	1	7
zmp_ph56	sa3636	copb1	ENSDARG00000056557	23	0.733378	1	8004	342	601	23	0.0427286	0.0382696	0.0262941	1	7
zmp_ph56	sa3636	copb1	ENSDARG00000056557	24	0.980885	1	8004	215	601	9	0.0268616	0.014975	0.00783396	1	7
zmp_ph56	sa3636	copb1	ENSDARG00000056557	25	0.838258	1	8004	219	601	13	0.0273613	0.0216306	0.0128409	1	7
zmp_ph58	sa6358	CLP1	ENSDARG00000063663	1	0.89172	1	13672	617	3142	128	0.0451287	0.0407384	0.035098	1	14
zmp_ph58	sa6358	CLP1	ENSDARG00000063663	2	0.359783	1	13672	637	3142	151	0.0465916	0.0480586	0.0419373	1	14
zmp_ph58	sa6358	CLP1	ENSDARG00000063663	3	0.020748	0.518699	13672	704	3142	188	0.0514921	0.0598345	0.0530215	1	14
zmp_ph58	sa6358	CLP1	ENSDARG00000063663	4	0.652118	1	13672	486	3142	108	0.0355471	0.034373	0.0291921	1	14
zmp_ph58	sa6358	CLP1	ENSDARG00000063663	5	0.330503	1	13672	800	3142	190	0.0585138	0.060471	0.0536231	1	14
zmp_ph58	sa6358	CLP1	ENSDARG00000063663	6	0.00263019	0.0657547	13672	614	3142	175	0.0449093	0.055697	0.0491171	1	14
zmp_ph58	sa6358	CLP1	ENSDARG00000063663	7	0.109903	1	13672	710	3142	179	0.051931	0.0569701	0.0503174	1	14
zmp_ph58	sa6358	CLP1	ENSDARG00000063663	8	0.606762	1	13672	595	3142	134	0.0435196	0.042648	0.0368777	1	14
zmp_ph58	sa6358	CLP1	ENSDARG00000063663	9	0.279084	1	13672	515	3142	125	0.0376682	0.0397836	0.0342094	1	14
zmp_ph58	sa6358	CLP1	ENSDARG00000063663	10	0.895146	1	13672	494	3142	101	0.0361322	0.0321451	0.027136	1	14
zmp_ph58	sa6358	CLP1	ENSDARG00000063663	11	0.552956	1	13672	470	3142	107	0.0343768	0.0340547	0.028898	1	14
zmp_ph58	sa6358	CLP1	ENSDARG00000063663	12	0.973599	1	13672	493	3142	94	0.0360591	0.0299173	0.0250867	1	14
zmp_ph58	sa6358	CLP1	ENSDARG00000063663	13	0.880981	1	13672	541	3142	112	0.0395699	0.0356461	0.0303697	1	14
zmp_ph58	sa6358	CLP1	ENSDARG00000063663	14	0.434162	1	13672	500	3142	117	0.0365711	0.0372374	0.0318443	1	14
zmp_ph58	sa6358	CLP1	ENSDARG00000063663	15	0.593358	1	13672	479	3142	108	0.0350351	0.034373	0.0291921	1	14
zmp_ph58	sa6358	CLP1	ENSDARG00000063663	16	0.232873	1	13672	614	3142	150	0.0449093	0.0477403	0.0416391	1	14
zmp_ph58	sa6358	CLP1	ENSDARG00000063663	17	0.905549	1	13672	506	3142	103	0.0370099	0.0327817	0.0277228	1	14
zmp_ph58	sa6358	CLP1	ENSDARG00000063663	18	0.666866	1	13672	439	3142	97	0.0321094	0.0308721	0.0259641	1	14
zmp_ph58	sa6358	CLP1	ENSDARG00000063663	19	0.323932	1	13672	585	3142	140	0.0427882	0.0445576	0.0386607	1	14
zmp_ph58	sa6358	CLP1	ENSDARG00000063663	20	0.631805	1	13672	563	3142	126	0.0411791	0.0401018	0.0345055	1	14
zmp_ph58	sa6358	CLP1	ENSDARG00000063663	21	0.0683484	1	13672	499	3142	131	0.036498	0.0416932	0.0359874	1	14
zmp_ph58	sa6358	CLP1	ENSDARG00000063663	22	0.575534	1	13672	455	3142	103	0.0332797	0.0327817	0.0277228	1	14
zmp_ph58	sa6358	CLP1	ENSDARG00000063663	23	0.863673	1	13672	537	3142	112	0.0392774	0.0356461	0.0303697	1	14
zmp_ph58	sa6358	CLP1	ENSDARG00000063663	24	0.992594	1	13672	394	3142	69	0.028818	0.0219605	0.0178347	1	14
zmp_ph58	sa6358	CLP1	ENSDARG00000063663	25	0.661111	1	13672	425	3142	94	0.0310854	0.0299173	0.0250867	1	14
zmp_ph69	sa5562	ttnb	ENSDARG00000000563	1	0.727421	1	5715	241	632	24	0.0421697	0.0379747	0.0263207	1	9
zmp_ph69	sa5562	ttnb	ENSDARG00000000563	2	0.833674	1	5715	278	632	26	0.0486439	0.0411392	0.0289838	1	9
zmp_ph69	sa5562	ttnb	ENSDARG00000000563	3	0.106673	1	5715	327	632	44	0.0572178	0.0696203	0.0537038	1	9
zmp_ph69	sa5562	ttnb	ENSDARG00000000563	4	0.750566	1	5715	196	632	19	0.0342957	0.0300633	0.0197742	1	9
zmp_ph69	sa5562	ttnb	ENSDARG00000000563	5	0.482005	1	5715	320	632	36	0.055993	0.056962	0.0425784	1	9
zmp_ph69	sa5562	ttnb	ENSDARG00000000563	6	0.0546257	1	5715	285	632	41	0.0498688	0.0648734	0.0495105	1	9
zmp_ph69	sa5562	ttnb	ENSDARG00000000563	7	0.425503	1	5715	277	632	32	0.0484689	0.0506329	0.0370917	1	9
zmp_ph69	sa5562	ttnb	ENSDARG00000000563	8	0.261244	1	5715	230	632	29	0.040245	0.0458861	0.0330174	1	9
zmp_ph69	sa5562	ttnb	ENSDARG00000000563	9	0.0061802	0.154505	5715	215	632	37	0.0376203	0.0585443	0.0439586	1	9
zmp_ph69	sa5562	ttnb	ENSDARG00000000563	10	0.982747	1	5715	195	632	13	0.0341207	0.0205696	0.0122089	1	9
zmp_ph69	sa5562	ttnb	ENSDARG00000000563	11	0.722491	1	5715	202	632	20	0.0353456	0.0316456	0.021069	1	9
zmp_ph69	sa5562	ttnb	ENSDARG00000000563	12	0.511906	1	5715	188	632	21	0.0328959	0.0332278	0.0223716	1	9
zmp_ph69	sa5562	ttnb	ENSDARG00000000563	13	0.611106	1	5715	217	632	23	0.0379703	0.0363924	0.0249978	1	9
zmp_ph69	sa5562	ttnb	ENSDARG00000000563	14	0.584484	1	5715	214	632	23	0.0374453	0.0363924	0.0249978	1	9
zmp_ph69	sa5562	ttnb	ENSDARG00000000563	15	0.568138	1	5715	203	632	22	0.0355206	0.0348101	0.0236813	1	9
zmp_ph69	sa5562	ttnb	ENSDARG00000000563	16	0.0736938	1	5715	244	632	35	0.0426947	0.0553797	0.0412014	1	9
zmp_ph69	sa5562	ttnb	ENSDARG00000000563	17	0.690096	1	5715	198	632	20	0.0346457	0.0316456	0.021069	1	9
zmp_ph69	sa5562	ttnb	ENSDARG00000000563	18	0.874909	1	5715	186	632	16	0.0325459	0.0253165	0.0159426	1	9
zmp_ph69	sa5562	ttnb	ENSDARG00000000563	19	0.938915	1	5715	256	632	21	0.0447944	0.0332278	0.0223716	1	9
zmp_ph69	sa5562	ttnb	ENSDARG00000000563	20	0.982483	1	5715	229	632	16	0.04007	0.0253165	0.0159426	1	9
zmp_ph69	sa5562	ttnb	ENSDARG00000000563	21	0.0873697	1	5715	240	632	34	0.0419948	0.0537975	0.0398278	1	9
zmp_ph69	sa5562	ttnb	ENSDARG00000000563	22	0.668525	1	5715	186	632	19	0.0325459	0.0300633	0.0197742	1	9
zmp_ph69	sa5562	ttnb	ENSDARG00000000563	23	0.808479	1	5715	234	632	22	0.0409449	0.0348101	0.0236813	1	9
zmp_ph69	sa5562	ttnb	ENSDARG00000000563	24	0.842686	1	5715	180	632	16	0.0314961	0.0253165	0.0159426	1	9
zmp_ph69	sa5562	ttnb	ENSDARG00000000563	25	0.220524	1	5715	174	632	23	0.0304462	0.0363924	0.0249978	1	9
zmp_ph71	sa18880	nod2	ENSDARG00000010756	1	0.988117	1	3808	173	139	2	0.0454307	0.0143885	0.00256252	1	7
zmp_ph71	sa18880	nod2	ENSDARG00000010756	2	0.99325	1	3808	190	139	2	0.049895	0.0143885	0.00256252	1	7
zmp_ph71	sa18880	nod2	ENSDARG00000010756	3	0.0286201	0.715502	3808	239	139	15	0.0627626	0.107914	0.0677062	1	7
zmp_ph71	sa18880	nod2	ENSDARG00000010756	4	0.397208	1	3808	139	139	6	0.0365021	0.0431655	0.0189629	1	7
zmp_ph71	sa18880	nod2	ENSDARG00000010756	5	0.354301	1	3808	209	139	9	0.0548845	0.0647482	0.0341906	1	7
zmp_ph71	sa18880	nod2	ENSDARG00000010756	6	0.859735	1	3808	200	139	5	0.052521	0.0359712	0.0142787	1	7
zmp_ph71	sa18880	nod2	ENSDARG00000010756	7	0.0003248	0.00811999	3808	180	139	17	0.0472689	0.122302	0.0794472	1	7
zmp_ph71	sa18880	nod2	ENSDARG00000010756	8	0.7926	1	3808	148	139	4	0.0388655	0.028777	0.00988807	1	7
zmp_ph71	sa18880	nod2	ENSDARG00000010756	9	0.0405153	1	3808	145	139	10	0.0380777	0.0719424	0.0395481	1	7
zmp_ph71	sa18880	nod2	ENSDARG00000010756	10	0.543092	1	3808	134	139	5	0.0351891	0.0359712	0.0142787	1	7
zmp_ph71	sa18880	nod2	ENSDARG00000010756	11	0.40373	1	3808	140	139	6	0.0367647	0.0431655	0.0189629	1	7
zmp_ph71	sa18880	nod2	ENSDARG00000010756	12	0.640979	1	3808	120	139	4	0.0315126	0.028777	0.00988807	1	7
zmp_ph71	sa18880	nod2	ENSDARG00000010756	13	0.883022	1	3808	138	139	3	0.0362395	0.0215827	0.0059079	1	7
zmp_ph71	sa18880	nod2	ENSDARG00000010756	14	0.114883	1	3808	133	139	8	0.0349265	0.057554	0.0289573	1	7
zmp_ph71	sa18880	nod2	ENSDARG00000010756	15	0.870499	1	3808	134	139	3	0.0351891	0.0215827	0.0059079	1	7
zmp_ph71	sa18880	nod2	ENSDARG00000010756	16	0.361521	1	3808	159	139	7	0.0417542	0.0503597	0.0238709	1	7
zmp_ph71	sa18880	nod2	ENSDARG00000010756	17	0.509269	1	3808	129	139	5	0.0338761	0.0359712	0.0142787	1	7
zmp_ph71	sa18880	nod2	ENSDARG00000010756	18	0.833962	1	3808	124	139	3	0.032563	0.0215827	0.0059079	1	7
zmp_ph71	sa18880	nod2	ENSDARG00000010756	19	0.990575	1	3808	180	139	2	0.0472689	0.0143885	0.00256252	1	7
zmp_ph71	sa18880	nod2	ENSDARG00000010756	20	0.995291	1	3808	144	139	1	0.0378151	0.00719424	0.000368948	1	7
zmp_ph71	sa18880	nod2	ENSDARG00000010756	21	0.555628	1	3808	164	139	6	0.0430672	0.0431655	0.0189629	1	7
zmp_ph71	sa18880	nod2	ENSDARG00000010756	22	0.607585	1	3808	115	139	4	0.0301996	0.028777	0.00988807	1	7
zmp_ph71	sa18880	nod2	ENSDARG00000010756	23	0.174773	1	3808	148	139	8	0.0388655	0.057554	0.0289573	1	7
zmp_ph71	sa18880	nod2	ENSDARG00000010756	24	0.912695	1	3808	110	139	2	0.0288866	0.0143885	0.00256252	1	7
zmp_ph71	sa18880	nod2	ENSDARG00000010756	25	0.920244	1	3808	113	139	2	0.0296744	0.0143885	0.00256252	1	7
zmp_ph77	sa3896	glra1	ENSDARG00000012019	1	0.6232	1	11504	521	715	31	0.0452886	0.0433566	0.0315593	1	14
zmp_ph77	sa3896	glra1	ENSDARG00000012019	2	0.832773	1	11504	547	715	29	0.0475487	0.0405594	0.0291647	1	14
zmp_ph77	sa3896	glra1	ENSDARG00000012019	3	0.0430303	1	11504	639	715	51	0.0555459	0.0713287	0.0561377	1	14
zmp_ph77	sa3896	glra1	ENSDARG00000012019	4	0.062453	1	11504	399	715	33	0.0346836	0.0461538	0.0339684	1	14
zmp_ph77	sa3896	glra1	ENSDARG00000012019	5	0.369214	1	11504	637	715	42	0.055372	0.0587413	0.0449575	1	14
zmp_ph77	sa3896	glra1	ENSDARG00000012019	6	0.225639	1	11504	521	715	37	0.0452886	0.0517483	0.0388248	1	14
zmp_ph77	sa3896	glra1	ENSDARG00000012019	7	0.646906	1	11504	593	715	35	0.0515473	0.048951	0.0363905	1	14
zmp_ph77	sa3896	glra1	ENSDARG00000012019	8	0.305602	1	11504	481	715	33	0.0418115	0.0461538	0.0339684	1	14
zmp_ph77	sa3896	glra1	ENSDARG00000012019	9	0.476043	1	11504	408	715	26	0.0354659	0.0363636	0.0256029	1	14
zmp_ph77	sa3896	glra1	ENSDARG00000012019	10	0.999959	1	11504	411	715	9	0.0357267	0.0125874	0.006582	1	14
zmp_ph77	sa3896	glra1	ENSDARG00000012019	11	0.917072	1	11504	405	715	19	0.0352051	0.0265734	0.0174696	1	14
zmp_ph77	sa3896	glra1	ENSDARG00000012019	12	0.843013	1	11504	410	715	21	0.0356398	0.0293706	0.0197636	1	14
zmp_ph77	sa3896	glra1	ENSDARG00000012019	13	0.72359	1	11504	445	715	25	0.0386822	0.034965	0.0244246	1	14
zmp_ph77	sa3896	glra1	ENSDARG00000012019	14	8.77827e-06	0.000219457	11504	436	715	52	0.0378999	0.0727273	0.0573896	1	14
zmp_ph77	sa3896	glra1	ENSDARG00000012019	15	0.948973	1	11504	407	715	18	0.035379	0.0251748	0.0163334	1	14
zmp_ph77	sa3896	glra1	ENSDARG00000012019	16	0.584529	1	11504	512	715	31	0.0445063	0.0433566	0.0315593	1	14
zmp_ph77	sa3896	glra1	ENSDARG00000012019	17	0.98977	1	11504	426	715	16	0.0370306	0.0223776	0.0140854	1	14
zmp_ph77	sa3896	glra1	ENSDARG00000012019	18	0.995733	1	11504	368	715	12	0.0319889	0.0167832	0.00971199	1	14
zmp_ph77	sa3896	glra1	ENSDARG00000012019	19	0.143626	1	11504	509	715	38	0.0442455	0.0531469	0.0400462	1	14
zmp_ph77	sa3896	glra1	ENSDARG00000012019	20	0.643093	1	11504	476	715	28	0.0413769	0.0391608	0.0279732	1	14
zmp_ph77	sa3896	glra1	ENSDARG00000012019	21	0.23947	1	11504	434	715	31	0.037726	0.0433566	0.0315593	1	14
zmp_ph77	sa3896	glra1	ENSDARG00000012019	22	0.844928	1	11504	375	715	19	0.0325974	0.0265734	0.0174696	1	14
zmp_ph77	sa3896	glra1	ENSDARG00000012019	23	0.466606	1	11504	454	715	29	0.0394645	0.0405594	0.0291647	1	14
zmp_ph77	sa3896	glra1	ENSDARG00000012019	24	0.128828	1	11504	343	715	27	0.0298157	0.0377622	0.0267858	1	14
zmp_ph77	sa3896	glra1	ENSDARG00000012019	25	0.406404	1	11504	347	715	23	0.0301634	0.0321678	0.022083	1	14
zmp_ph78	sa6529	ryr1	ENSDARG00000023797	1	1	1	5831	271	22	0	0.0464757	0	0	1	18
zmp_ph78	sa6529	ryr1	ENSDARG00000023797	2	0.295385	1	5831	287	22	2	0.0492197	0.0909091	0.0163975	1	18
zmp_ph78	sa6529	ryr1	ENSDARG00000023797	3	0.364484	1	5831	336	22	2	0.057623	0.0909091	0.0163975	1	18
zmp_ph78	sa6529	ryr1	ENSDARG00000023797	4	1	1	5831	200	22	0	0.0342994	0	0	1	18
zmp_ph78	sa6529	ryr1	ENSDARG00000023797	5	0.72132	1	5831	329	22	1	0.0564226	0.0454545	0.0023288	1	18
zmp_ph78	sa6529	ryr1	ENSDARG00000023797	6	0.644817	1	5831	268	22	1	0.0459612	0.0454545	0.0023288	1	18
zmp_ph78	sa6529	ryr1	ENSDARG00000023797	7	0.695748	1	5831	307	22	1	0.0526496	0.0454545	0.0023288	1	18
zmp_ph78	sa6529	ryr1	ENSDARG00000023797	8	0.592266	1	5831	233	22	1	0.0399588	0.0454545	0.0023288	1	18
zmp_ph78	sa6529	ryr1	ENSDARG00000023797	9	1	1	5831	220	22	0	0.0377294	0	0	1	18
zmp_ph78	sa6529	ryr1	ENSDARG00000023797	10	1	1	5831	204	22	0	0.0349854	0	0	1	18
zmp_ph78	sa6529	ryr1	ENSDARG00000023797	11	1	1	5831	205	22	0	0.0351569	0	0	1	18
zmp_ph78	sa6529	ryr1	ENSDARG00000023797	12	1	1	5831	210	22	0	0.0360144	0	0	1	18
zmp_ph78	sa6529	ryr1	ENSDARG00000023797	13	0.199413	1	5831	219	22	2	0.0375579	0.0909091	0.0163975	1	18
zmp_ph78	sa6529	ryr1	ENSDARG00000023797	14	1	1	5831	218	22	0	0.0373864	0	0	1	18
zmp_ph78	sa6529	ryr1	ENSDARG00000023797	15	1	1	5831	185	22	0	0.031727	0	0	1	18
zmp_ph78	sa6529	ryr1	ENSDARG00000023797	16	1	1	5831	249	22	0	0.0427028	0	0	1	18
zmp_ph78	sa6529	ryr1	ENSDARG00000023797	17	1	1	5831	199	22	0	0.0341279	0	0	1	18
zmp_ph78	sa6529	ryr1	ENSDARG00000023797	18	3.62272e-06	9.0568e-05	5831	185	22	7	0.031727	0.318182	0.159941	1	18
zmp_ph78	sa6529	ryr1	ENSDARG00000023797	19	1	1	5831	271	22	0	0.0464757	0	0	1	18
zmp_ph78	sa6529	ryr1	ENSDARG00000023797	20	0.598628	1	5831	237	22	1	0.0406448	0.0454545	0.0023288	1	18
zmp_ph78	sa6529	ryr1	ENSDARG00000023797	21	0.606447	1	5831	242	22	1	0.0415023	0.0454545	0.0023288	1	18
zmp_ph78	sa6529	ryr1	ENSDARG00000023797	22	1	1	5831	186	22	0	0.0318985	0	0	1	18
zmp_ph78	sa6529	ryr1	ENSDARG00000023797	23	0.598628	1	5831	237	22	1	0.0406448	0.0454545	0.0023288	1	18
zmp_ph78	sa6529	ryr1	ENSDARG00000023797	24	0.131319	1	5831	168	22	2	0.0288115	0.0909091	0.0163975	1	18
zmp_ph78	sa6529	ryr1	ENSDARG00000023797	25	1	1	5831	165	22	0	0.028297	0	0	1	18
zmp_ph80	sa23341	ryr1	ENSDARG00000023797	1	0.220357	1	7570	326	815	40	0.0430647	0.0490798	0.0372535	1	18
zmp_ph80	sa23341	ryr1	ENSDARG00000023797	2	0.840735	1	7570	368	815	34	0.0486129	0.0417178	0.0308399	1	18
zmp_ph80	sa23341	ryr1	ENSDARG00000023797	3	0.0516118	1	7570	415	815	56	0.0548217	0.0687117	0.0547031	1	18
zmp_ph80	sa23341	ryr1	ENSDARG00000023797	4	0.537044	1	7570	252	815	27	0.0332893	0.0331288	0.0234849	1	18
zmp_ph80	sa23341	ryr1	ENSDARG00000023797	5	0.994807	1	7570	433	815	31	0.0571995	0.0380368	0.0276686	1	18
zmp_ph80	sa23341	ryr1	ENSDARG00000023797	6	0.101954	1	7570	351	815	46	0.0463672	0.0564417	0.0437456	1	18
zmp_ph80	sa23341	ryr1	ENSDARG00000023797	7	0.645803	1	7570	390	815	40	0.0515192	0.0490798	0.0372535	1	18
zmp_ph80	sa23341	ryr1	ENSDARG00000023797	8	0.583988	1	7570	305	815	32	0.0402906	0.0392638	0.0287228	1	18
zmp_ph80	sa23341	ryr1	ENSDARG00000023797	9	0.583248	1	7570	286	815	30	0.0377807	0.0368098	0.0266176	1	18
zmp_ph80	sa23341	ryr1	ENSDARG00000023797	10	0.555278	1	7570	273	815	29	0.0360634	0.0355828	0.0255699	1	18
zmp_ph80	sa23341	ryr1	ENSDARG00000023797	11	0.948891	1	7570	257	815	20	0.0339498	0.0245399	0.0163212	1	18
zmp_ph80	sa23341	ryr1	ENSDARG00000023797	12	0.322727	1	7570	280	815	33	0.0369881	0.0404908	0.0297799	1	18
zmp_ph80	sa23341	ryr1	ENSDARG00000023797	13	0.851955	1	7570	300	815	27	0.0396301	0.0331288	0.0234849	1	18
zmp_ph80	sa23341	ryr1	ENSDARG00000023797	14	0.638825	1	7570	303	815	31	0.0400264	0.0380368	0.0276686	1	18
zmp_ph80	sa23341	ryr1	ENSDARG00000023797	15	0.810915	1	7570	241	815	22	0.0318362	0.0269939	0.0183437	1	18
zmp_ph80	sa23341	ryr1	ENSDARG00000023797	16	0.338256	1	7570	336	815	39	0.0443857	0.0478528	0.0361786	1	18
zmp_ph80	sa23341	ryr1	ENSDARG00000023797	17	0.400093	1	7570	254	815	29	0.0335535	0.0355828	0.0255699	1	18
zmp_ph80	sa23341	ryr1	ENSDARG00000023797	18	0.00026196	0.00654901	7570	245	815	46	0.0323646	0.0564417	0.0437456	1	18
zmp_ph80	sa23341	ryr1	ENSDARG00000023797	19	0.818743	1	7570	343	815	32	0.0453104	0.0392638	0.0287228	1	18
zmp_ph80	sa23341	ryr1	ENSDARG00000023797	20	0.627758	1	7570	311	815	32	0.0410832	0.0392638	0.0287228	1	18
zmp_ph80	sa23341	ryr1	ENSDARG00000023797	21	0.234978	1	7570	311	815	38	0.0410832	0.0466258	0.035106	1	18
zmp_ph80	sa23341	ryr1	ENSDARG00000023797	22	0.631491	1	7570	235	815	24	0.0310436	0.0294479	0.0203868	1	18
zmp_ph80	sa23341	ryr1	ENSDARG00000023797	23	0.609763	1	7570	318	815	33	0.0420079	0.0404908	0.0297799	1	18
zmp_ph80	sa23341	ryr1	ENSDARG00000023797	24	0.490963	1	7570	228	815	25	0.0301189	0.0306748	0.0214153	1	18
zmp_ph80	sa23341	ryr1	ENSDARG00000023797	25	0.801517	1	7570	209	815	19	0.027609	0.0233129	0.0153187	1	18
zmp_ph86	sa898	kdm2aa	ENSDARG00000059653	1	0.212306	1	3151	141	53	4	0.0447477	0.0754717	0.0261894	1	1
zmp_ph86	sa898	kdm2aa	ENSDARG00000059653	2	0.748242	1	3151	157	53	2	0.0498255	0.0377358	0.00674628	1	1
zmp_ph86	sa898	kdm2aa	ENSDARG00000059653	3	0.972219	1	3151	206	53	1	0.0653761	0.0188679	0.00096733	1	1
zmp_ph86	sa898	kdm2aa	ENSDARG00000059653	4	0.580777	1	3151	115	53	2	0.0364964	0.0377358	0.00674628	1	1
zmp_ph86	sa898	kdm2aa	ENSDARG00000059653	5	0.339685	1	3151	175	53	4	0.0555379	0.0754717	0.0261894	1	1
zmp_ph86	sa898	kdm2aa	ENSDARG00000059653	6	0.0259531	0.648828	3151	174	53	7	0.0552206	0.132075	0.0636638	1	1
zmp_ph86	sa898	kdm2aa	ENSDARG00000059653	7	0.201785	1	3151	138	53	4	0.0437956	0.0754717	0.0261894	1	1
zmp_ph86	sa898	kdm2aa	ENSDARG00000059653	8	0.882973	1	3151	125	53	1	0.0396699	0.0188679	0.00096733	1	1
zmp_ph86	sa898	kdm2aa	ENSDARG00000059653	9	0.870018	1	3151	119	53	1	0.0377658	0.0188679	0.00096733	1	1
zmp_ph86	sa898	kdm2aa	ENSDARG00000059653	10	0.571114	1	3151	113	53	2	0.0358616	0.0377358	0.00674628	1	1
zmp_ph86	sa898	kdm2aa	ENSDARG00000059653	11	1	1	3151	116	53	0	0.0368137	0	0	1	1
zmp_ph86	sa898	kdm2aa	ENSDARG00000059653	12	1	1	3151	97	53	0	0.0307839	0	0	1	1
zmp_ph86	sa898	kdm2aa	ENSDARG00000059653	13	0.865395	1	3151	117	53	1	0.0371311	0.0188679	0.00096733	1	1
zmp_ph86	sa898	kdm2aa	ENSDARG00000059653	14	0.845235	1	3151	109	53	1	0.0345922	0.0188679	0.00096733	1	1
zmp_ph86	sa898	kdm2aa	ENSDARG00000059653	15	0.102636	1	3151	106	53	4	0.0336401	0.0754717	0.0261894	1	1
zmp_ph86	sa898	kdm2aa	ENSDARG00000059653	16	0.198315	1	3151	137	53	4	0.0434783	0.0754717	0.0261894	1	1
zmp_ph86	sa898	kdm2aa	ENSDARG00000059653	17	0.828198	1	3151	103	53	1	0.032688	0.0188679	0.00096733	1	1
zmp_ph86	sa898	kdm2aa	ENSDARG00000059653	18	0.515232	1	3151	102	53	2	0.0323707	0.0377358	0.00674628	1	1
zmp_ph86	sa898	kdm2aa	ENSDARG00000059653	19	0.278337	1	3151	159	53	4	0.0504602	0.0754717	0.0261894	1	1
zmp_ph86	sa898	kdm2aa	ENSDARG00000059653	20	0.863024	1	3151	116	53	1	0.0368137	0.0188679	0.00096733	1	1
zmp_ph86	sa898	kdm2aa	ENSDARG00000059653	21	0.896491	1	3151	132	53	1	0.0418915	0.0188679	0.00096733	1	1
zmp_ph86	sa898	kdm2aa	ENSDARG00000059653	22	0.49921	1	3151	99	53	2	0.0314186	0.0377358	0.00674628	1	1
zmp_ph86	sa898	kdm2aa	ENSDARG00000059653	23	0.622335	1	3151	124	53	2	0.0393526	0.0377358	0.00674628	1	1
zmp_ph86	sa898	kdm2aa	ENSDARG00000059653	24	0.769299	1	3151	86	53	1	0.0272929	0.0188679	0.00096733	1	1
zmp_ph86	sa898	kdm2aa	ENSDARG00000059653	25	0.765275	1	3151	85	53	1	0.0269756	0.0188679	0.00096733	1	1
zmp_ph87	sa3105	dnmt3aa	ENSDARG00000005394	1	0.549731	1	13990	633	424	19	0.0452466	0.0448113	0.0295398	1	20
zmp_ph87	sa3105	dnmt3aa	ENSDARG00000005394	2	0.443909	1	13990	661	424	21	0.047248	0.0495283	0.033425	1	20
zmp_ph87	sa3105	dnmt3aa	ENSDARG00000005394	3	0.968129	1	13990	749	424	15	0.0535382	0.0353774	0.0219313	1	20
zmp_ph87	sa3105	dnmt3aa	ENSDARG00000005394	4	0.0937968	1	13990	506	424	21	0.0361687	0.0495283	0.033425	1	20
zmp_ph87	sa3105	dnmt3aa	ENSDARG00000005394	5	0.96349	1	13990	779	424	16	0.0556826	0.0377358	0.0238102	1	20
zmp_ph87	sa3105	dnmt3aa	ENSDARG00000005394	6	0.970123	1	13990	631	424	12	0.0451036	0.0283019	0.01641	1	20
zmp_ph87	sa3105	dnmt3aa	ENSDARG00000005394	7	0.880754	1	13990	719	424	17	0.0513939	0.0400943	0.0257055	1	20
zmp_ph87	sa3105	dnmt3aa	ENSDARG00000005394	8	0.443784	1	13990	596	424	19	0.0426019	0.0448113	0.0295398	1	20
zmp_ph87	sa3105	dnmt3aa	ENSDARG00000005394	9	0.000516675	0.0129169	13990	510	424	30	0.0364546	0.0707547	0.0513853	1	20
zmp_ph87	sa3105	dnmt3aa	ENSDARG00000005394	10	0.826122	1	13990	498	424	12	0.0355969	0.0283019	0.01641	1	20
zmp_ph87	sa3105	dnmt3aa	ENSDARG00000005394	11	0.710898	1	13990	485	424	13	0.0346676	0.0306604	0.0182291	1	20
zmp_ph87	sa3105	dnmt3aa	ENSDARG00000005394	12	0.742094	1	13990	497	424	13	0.0355254	0.0306604	0.0182291	1	20
zmp_ph87	sa3105	dnmt3aa	ENSDARG00000005394	13	0.949209	1	13990	554	424	11	0.0395997	0.0259434	0.0146159	1	20
zmp_ph87	sa3105	dnmt3aa	ENSDARG00000005394	14	0.820154	1	13990	495	424	12	0.0353824	0.0283019	0.01641	1	20
zmp_ph87	sa3105	dnmt3aa	ENSDARG00000005394	15	0.643382	1	13990	496	424	14	0.0354539	0.0330189	0.0200702	1	20
zmp_ph87	sa3105	dnmt3aa	ENSDARG00000005394	16	0.708732	1	13990	625	424	17	0.0446748	0.0400943	0.0257055	1	20
zmp_ph87	sa3105	dnmt3aa	ENSDARG00000005394	17	0.196849	1	13990	534	424	20	0.0381701	0.0471698	0.0314765	1	20
zmp_ph87	sa3105	dnmt3aa	ENSDARG00000005394	18	0.703775	1	13990	447	424	12	0.0319514	0.0283019	0.01641	1	20
zmp_ph87	sa3105	dnmt3aa	ENSDARG00000005394	19	0.713825	1	13990	592	424	16	0.0423159	0.0377358	0.0238102	1	20
zmp_ph87	sa3105	dnmt3aa	ENSDARG00000005394	20	0.125439	1	13990	585	424	23	0.0418156	0.0542453	0.0373543	1	20
zmp_ph87	sa3105	dnmt3aa	ENSDARG00000005394	21	0.179617	1	13990	526	424	20	0.0375983	0.0471698	0.0314765	1	20
zmp_ph87	sa3105	dnmt3aa	ENSDARG00000005394	22	0.00604829	0.151207	13990	500	424	26	0.0357398	0.0613208	0.0433195	1	20
zmp_ph87	sa3105	dnmt3aa	ENSDARG00000005394	23	0.38869	1	13990	545	424	18	0.0389564	0.0424528	0.0276158	1	20
zmp_ph87	sa3105	dnmt3aa	ENSDARG00000005394	24	0.687271	1	13990	406	424	11	0.0290207	0.0259434	0.0146159	1	20
zmp_ph87	sa3105	dnmt3aa	ENSDARG00000005394	25	0.212579	1	13990	421	424	16	0.0300929	0.0377358	0.0238102	1	20
zmp_ph88	sa15458	dnmt3bb.1	ENSDARG00000036791	1	1	1	12154	540	48	0	0.0444298	0	0	1	23
zmp_ph88	sa15458	dnmt3bb.1	ENSDARG00000036791	2	0.906702	1	12154	586	48	1	0.0482146	0.0208333	0.00106804	1	23
zmp_ph88	sa15458	dnmt3bb.1	ENSDARG00000036791	3	1	1	12154	661	48	0	0.0543854	0	0	1	23
zmp_ph88	sa15458	dnmt3bb.1	ENSDARG00000036791	4	0.805028	1	12154	407	48	1	0.0334869	0.0208333	0.00106804	1	23
zmp_ph88	sa15458	dnmt3bb.1	ENSDARG00000036791	5	1	1	12154	674	48	0	0.055455	0	0	1	23
zmp_ph88	sa15458	dnmt3bb.1	ENSDARG00000036791	6	1	1	12154	554	48	0	0.0455817	0	0	1	23
zmp_ph88	sa15458	dnmt3bb.1	ENSDARG00000036791	7	0.921648	1	12154	628	48	1	0.0516702	0.0208333	0.00106804	1	23
zmp_ph88	sa15458	dnmt3bb.1	ENSDARG00000036791	8	1	1	12154	497	48	0	0.0408919	0	0	1	23
zmp_ph88	sa15458	dnmt3bb.1	ENSDARG00000036791	9	1	1	12154	434	48	0	0.0357084	0	0	1	23
zmp_ph88	sa15458	dnmt3bb.1	ENSDARG00000036791	10	1	1	12154	453	48	0	0.0372717	0	0	1	23
zmp_ph88	sa15458	dnmt3bb.1	ENSDARG00000036791	11	1	1	12154	435	48	0	0.0357907	0	0	1	23
zmp_ph88	sa15458	dnmt3bb.1	ENSDARG00000036791	12	1	1	12154	429	48	0	0.035297	0	0	1	23
zmp_ph88	sa15458	dnmt3bb.1	ENSDARG00000036791	13	1	1	12154	476	48	0	0.0391641	0	0	1	23
zmp_ph88	sa15458	dnmt3bb.1	ENSDARG00000036791	14	0.528666	1	12154	445	48	2	0.0366135	0.0416667	0.00745384	1	23
zmp_ph88	sa15458	dnmt3bb.1	ENSDARG00000036791	15	1	1	12154	429	48	0	0.035297	0	0	1	23
zmp_ph88	sa15458	dnmt3bb.1	ENSDARG00000036791	16	1	1	12154	542	48	0	0.0445944	0	0	1	23
zmp_ph88	sa15458	dnmt3bb.1	ENSDARG00000036791	17	1	1	12154	460	48	0	0.0378476	0	0	1	23
zmp_ph88	sa15458	dnmt3bb.1	ENSDARG00000036791	18	0.810528	1	12154	414	48	1	0.0340629	0.0208333	0.00106804	1	23
zmp_ph88	sa15458	dnmt3bb.1	ENSDARG00000036791	19	0.605817	1	12154	512	48	2	0.042126	0.0416667	0.00745384	1	23
zmp_ph88	sa15458	dnmt3bb.1	ENSDARG00000036791	20	0.874851	1	12154	515	48	1	0.0423729	0.0208333	0.00106804	1	23
zmp_ph88	sa15458	dnmt3bb.1	ENSDARG00000036791	21	1	1	12154	460	48	0	0.0378476	0	0	1	23
zmp_ph88	sa15458	dnmt3bb.1	ENSDARG00000036791	22	0.475574	1	12154	403	48	2	0.0331578	0.0416667	0.00745384	1	23
zmp_ph88	sa15458	dnmt3bb.1	ENSDARG00000036791	23	8.65876e-43	2.16469e-41	12154	471	48	37	0.0387527	0.770833	0.649307	1	23
zmp_ph88	sa15458	dnmt3bb.1	ENSDARG00000036791	24	1	1	12154	366	48	0	0.0301135	0	0	1	23
zmp_ph88	sa15458	dnmt3bb.1	ENSDARG00000036791	25	1	1	12154	363	48	0	0.0298667	0	0	1	23
zmp_ph90	sa14480	dnmt3ba	ENSDARG00000052402	1	1	1	12783	571	16	0	0.0446687	0	0	1	8
zmp_ph90	sa14480	dnmt3ba	ENSDARG00000052402	2	1	1	12783	607	16	0	0.0474849	0	0	1	8
zmp_ph90	sa14480	dnmt3ba	ENSDARG00000052402	3	1	1	12783	689	16	0	0.0538997	0	0	1	8
zmp_ph90	sa14480	dnmt3ba	ENSDARG00000052402	4	1	1	12783	441	16	0	0.0344989	0	0	1	8
zmp_ph90	sa14480	dnmt3ba	ENSDARG00000052402	5	0.607102	1	12783	725	16	1	0.056716	0.0625	0.0032007	1	8
zmp_ph90	sa14480	dnmt3ba	ENSDARG00000052402	6	1	1	12783	587	16	0	0.0459204	0	0	1	8
zmp_ph90	sa14480	dnmt3ba	ENSDARG00000052402	7	1	1	12783	660	16	0	0.0516311	0	0	1	8
zmp_ph90	sa14480	dnmt3ba	ENSDARG00000052402	8	3.56596e-05	0.000891491	12783	552	16	6	0.0431824	0.375	0.177766	1	8
zmp_ph90	sa14480	dnmt3ba	ENSDARG00000052402	9	1	1	12783	457	16	0	0.0357506	0	0	1	8
zmp_ph90	sa14480	dnmt3ba	ENSDARG00000052402	10	0.450842	1	12783	470	16	1	0.0367676	0.0625	0.0032007	1	8
zmp_ph90	sa14480	dnmt3ba	ENSDARG00000052402	11	0.431255	1	12783	443	16	1	0.0346554	0.0625	0.0032007	1	8
zmp_ph90	sa14480	dnmt3ba	ENSDARG00000052402	12	1	1	12783	447	16	0	0.0349683	0	0	1	8
zmp_ph90	sa14480	dnmt3ba	ENSDARG00000052402	13	1	1	12783	491	16	0	0.0384104	0	0	1	8
zmp_ph90	sa14480	dnmt3ba	ENSDARG00000052402	14	0.457935	1	12783	480	16	1	0.0375499	0.0625	0.0032007	1	8
zmp_ph90	sa14480	dnmt3ba	ENSDARG00000052402	15	1	1	12783	447	16	0	0.0349683	0	0	1	8
zmp_ph90	sa14480	dnmt3ba	ENSDARG00000052402	16	0.519277	1	12783	572	16	1	0.0447469	0.0625	0.0032007	1	8
zmp_ph90	sa14480	dnmt3ba	ENSDARG00000052402	17	1	1	12783	486	16	0	0.0380192	0	0	1	8
zmp_ph90	sa14480	dnmt3ba	ENSDARG00000052402	18	0.415569	1	12783	422	16	1	0.0330126	0.0625	0.0032007	1	8
zmp_ph90	sa14480	dnmt3ba	ENSDARG00000052402	19	0.493453	1	12783	532	16	1	0.0416178	0.0625	0.0032007	1	8
zmp_ph90	sa14480	dnmt3ba	ENSDARG00000052402	20	0.49675	1	12783	537	16	1	0.0420089	0.0625	0.0032007	1	8
zmp_ph90	sa14480	dnmt3ba	ENSDARG00000052402	21	0.455816	1	12783	477	16	1	0.0373152	0.0625	0.0032007	1	8
zmp_ph90	sa14480	dnmt3ba	ENSDARG00000052402	22	1	1	12783	428	16	0	0.033482	0	0	1	8
zmp_ph90	sa14480	dnmt3ba	ENSDARG00000052402	23	1	1	12783	507	16	0	0.0396621	0	0	1	8
zmp_ph90	sa14480	dnmt3ba	ENSDARG00000052402	24	0.38138	1	12783	378	16	1	0.0295705	0.0625	0.0032007	1	8
zmp_ph90	sa14480	dnmt3ba	ENSDARG00000052402	25	1	1	12783	377	16	0	0.0294923	0	0	1	8
zmp_ph97	sa9360	kdm2aa	ENSDARG00000059653	1	0.0163817	0.409543	5031	229	260	20	0.0455178	0.0769231	0.051559	1	1
zmp_ph97	sa9360	kdm2aa	ENSDARG00000059653	2	0.849131	1	5031	254	260	10	0.050487	0.0384615	0.0210126	1	1
zmp_ph97	sa9360	kdm2aa	ENSDARG00000059653	3	0.66616	1	5031	295	260	14	0.0586365	0.0538462	0.0328435	1	1
zmp_ph97	sa9360	kdm2aa	ENSDARG00000059653	4	0.538678	1	5031	173	260	9	0.0343868	0.0346154	0.0181749	1	1
zmp_ph97	sa9360	kdm2aa	ENSDARG00000059653	5	0.854707	1	5031	278	260	11	0.0552574	0.0423077	0.0239046	1	1
zmp_ph97	sa9360	kdm2aa	ENSDARG00000059653	6	0.330035	1	5031	253	260	15	0.0502882	0.0576923	0.0358951	1	1
zmp_ph97	sa9360	kdm2aa	ENSDARG00000059653	7	0.156892	1	5031	251	260	17	0.0498907	0.0653846	0.0420864	1	1
zmp_ph97	sa9360	kdm2aa	ENSDARG00000059653	8	0.782716	1	5031	193	260	8	0.0383622	0.0307692	0.0154008	1	1
zmp_ph97	sa9360	kdm2aa	ENSDARG00000059653	9	0.129359	1	5031	193	260	14	0.0383622	0.0538462	0.0328435	1	1
zmp_ph97	sa9360	kdm2aa	ENSDARG00000059653	10	0.792521	1	5031	173	260	7	0.0343868	0.0269231	0.0127025	1	1
zmp_ph97	sa9360	kdm2aa	ENSDARG00000059653	11	0.566256	1	5031	177	260	9	0.0351819	0.0346154	0.0181749	1	1
zmp_ph97	sa9360	kdm2aa	ENSDARG00000059653	12	0.46735	1	5031	163	260	9	0.0323991	0.0346154	0.0181749	1	1
zmp_ph97	sa9360	kdm2aa	ENSDARG00000059653	13	0.64439	1	5031	189	260	9	0.0375671	0.0346154	0.0181749	1	1
zmp_ph97	sa9360	kdm2aa	ENSDARG00000059653	14	0.487414	1	5031	185	260	10	0.036772	0.0384615	0.0210126	1	1
zmp_ph97	sa9360	kdm2aa	ENSDARG00000059653	15	0.242699	1	5031	166	260	11	0.0329954	0.0423077	0.0239046	1	1
zmp_ph97	sa9360	kdm2aa	ENSDARG00000059653	16	0.53733	1	5031	212	260	11	0.0421387	0.0423077	0.0239046	1	1
zmp_ph97	sa9360	kdm2aa	ENSDARG00000059653	17	0.792521	1	5031	173	260	7	0.0343868	0.0269231	0.0127025	1	1
zmp_ph97	sa9360	kdm2aa	ENSDARG00000059653	18	0.510496	1	5031	169	260	9	0.0335917	0.0346154	0.0181749	1	1
zmp_ph97	sa9360	kdm2aa	ENSDARG00000059653	19	0.744079	1	5031	228	260	10	0.045319	0.0384615	0.0210126	1	1
zmp_ph97	sa9360	kdm2aa	ENSDARG00000059653	20	0.769805	1	5031	212	260	9	0.0421387	0.0346154	0.0181749	1	1
zmp_ph97	sa9360	kdm2aa	ENSDARG00000059653	21	0.740451	1	5031	206	260	9	0.0409461	0.0346154	0.0181749	1	1
zmp_ph97	sa9360	kdm2aa	ENSDARG00000059653	22	0.920676	1	5031	161	260	5	0.0320016	0.0192308	0.00760731	1	1
zmp_ph97	sa9360	kdm2aa	ENSDARG00000059653	23	0.23262	1	5031	199	260	13	0.0395548	0.05	0.0298252	1	1
zmp_ph97	sa9360	kdm2aa	ENSDARG00000059653	24	0.623957	1	5031	145	260	7	0.0288213	0.0269231	0.0127025	1	1
zmp_ph97	sa9360	kdm2aa	ENSDARG00000059653	25	0.685312	1	5031	154	260	7	0.0306102	0.0269231	0.0127025	1	1
zmp_ph98	sa9360	kdm2aa	ENSDARG00000059653	1	0.00338908	0.0847269	2484	99	186	16	0.0398551	0.0860215	0.0547007	1	1
zmp_ph98	sa9360	kdm2aa	ENSDARG00000059653	2	0.462459	1	2484	112	186	9	0.0450886	0.0483871	0.0254717	1	1
zmp_ph98	sa9360	kdm2aa	ENSDARG00000059653	3	0.362328	1	2484	166	186	14	0.0668277	0.0752688	0.0460762	1	1
zmp_ph98	sa9360	kdm2aa	ENSDARG00000059653	4	0.765644	1	2484	85	186	5	0.034219	0.0268817	0.0106506	1	1
zmp_ph98	sa9360	kdm2aa	ENSDARG00000059653	5	0.650072	1	2484	145	186	10	0.0583736	0.0537634	0.0294551	1	1
zmp_ph98	sa9360	kdm2aa	ENSDARG00000059653	6	0.535417	1	2484	146	186	11	0.0587762	0.0591398	0.0335162	1	1
zmp_ph98	sa9360	kdm2aa	ENSDARG00000059653	7	0.462459	1	2484	112	186	9	0.0450886	0.0483871	0.0254717	1	1
zmp_ph98	sa9360	kdm2aa	ENSDARG00000059653	8	0.452537	1	2484	98	186	8	0.0394525	0.0430108	0.021579	1	1
zmp_ph98	sa9360	kdm2aa	ENSDARG00000059653	9	0.754433	1	2484	99	186	6	0.0398551	0.0322581	0.0141398	1	1
zmp_ph98	sa9360	kdm2aa	ENSDARG00000059653	10	0.440936	1	2484	84	186	7	0.0338164	0.0376344	0.0177938	1	1
zmp_ph98	sa9360	kdm2aa	ENSDARG00000059653	11	0.842355	1	2484	95	186	5	0.0382448	0.0268817	0.0106506	1	1
zmp_ph98	sa9360	kdm2aa	ENSDARG00000059653	12	0.305947	1	2484	85	186	8	0.034219	0.0430108	0.021579	1	1
zmp_ph98	sa9360	kdm2aa	ENSDARG00000059653	13	0.821817	1	2484	92	186	5	0.037037	0.0268817	0.0106506	1	1
zmp_ph98	sa9360	kdm2aa	ENSDARG00000059653	14	0.858879	1	2484	81	186	4	0.0326087	0.0215054	0.00737834	1	1
zmp_ph98	sa9360	kdm2aa	ENSDARG00000059653	15	0.838344	1	2484	78	186	4	0.031401	0.0215054	0.00737834	1	1
zmp_ph98	sa9360	kdm2aa	ENSDARG00000059653	16	0.254204	1	2484	104	186	10	0.041868	0.0537634	0.0294551	1	1
zmp_ph98	sa9360	kdm2aa	ENSDARG00000059653	17	0.718023	1	2484	80	186	5	0.0322061	0.0268817	0.0106506	1	1
zmp_ph98	sa9360	kdm2aa	ENSDARG00000059653	18	0.492441	1	2484	75	186	6	0.0301932	0.0322581	0.0141398	1	1
zmp_ph98	sa9360	kdm2aa	ENSDARG00000059653	19	0.220903	1	2484	124	186	12	0.0499195	0.0645161	0.0376452	1	1
zmp_ph98	sa9360	kdm2aa	ENSDARG00000059653	20	0.88279	1	2484	85	186	4	0.034219	0.0215054	0.00737834	1	1
zmp_ph98	sa9360	kdm2aa	ENSDARG00000059653	21	0.583362	1	2484	110	186	8	0.0442834	0.0430108	0.021579	1	1
zmp_ph98	sa9360	kdm2aa	ENSDARG00000059653	22	0.983695	1	2484	80	186	2	0.0322061	0.0107527	0.00191387	1	1
zmp_ph98	sa9360	kdm2aa	ENSDARG00000059653	23	0.377149	1	2484	104	186	9	0.041868	0.0483871	0.0254717	1	1
zmp_ph98	sa9360	kdm2aa	ENSDARG00000059653	24	0.156897	1	2484	70	186	8	0.0281804	0.0430108	0.021579	1	1
zmp_ph98	sa9360	kdm2aa	ENSDARG00000059653	25	0.996662	1	2484	75	186	1	0.0301932	0.00537634	0.000275732	1	1
zmp_ph108	sa898	kdm2aa	ENSDARG00000059653	1	0.000178172	0.0044543	2421	102	220	22	0.0421314	0.1	0.0686737	1	1
zmp_ph108	sa898	kdm2aa	ENSDARG00000059653	2	0.439679	1	2421	112	220	11	0.0462619	0.05	0.0282899	1	1
zmp_ph108	sa898	kdm2aa	ENSDARG00000059653	3	0.179023	1	2421	166	220	19	0.0685667	0.0863636	0.0572922	1	1
zmp_ph108	sa898	kdm2aa	ENSDARG00000059653	4	0.796197	1	2421	86	220	6	0.0355225	0.0272727	0.0119425	1	1
zmp_ph108	sa898	kdm2aa	ENSDARG00000059653	5	0.54104	1	2421	132	220	12	0.0545229	0.0545455	0.0317715	1	1
zmp_ph108	sa898	kdm2aa	ENSDARG00000059653	6	0.97441	1	2421	141	220	7	0.0582404	0.0318182	0.0150266	1	1
zmp_ph108	sa898	kdm2aa	ENSDARG00000059653	7	0.0470769	1	2421	102	220	15	0.0421314	0.0681818	0.0424948	1	1
zmp_ph108	sa898	kdm2aa	ENSDARG00000059653	8	0.570809	1	2421	101	220	9	0.0417183	0.0409091	0.0215048	1	1
zmp_ph108	sa898	kdm2aa	ENSDARG00000059653	9	0.0327303	0.818256	2421	97	220	15	0.0400661	0.0681818	0.0424948	1	1
zmp_ph108	sa898	kdm2aa	ENSDARG00000059653	10	0.986402	1	2421	87	220	3	0.0359356	0.0136364	0.00372682	1	1
zmp_ph108	sa898	kdm2aa	ENSDARG00000059653	11	0.701879	1	2421	89	220	7	0.0367617	0.0318182	0.0150266	1	1
zmp_ph108	sa898	kdm2aa	ENSDARG00000059653	12	0.428347	1	2421	79	220	8	0.0326311	0.0363636	0.0182206	1	1
zmp_ph108	sa898	kdm2aa	ENSDARG00000059653	13	0.549161	1	2421	88	220	8	0.0363486	0.0363636	0.0182206	1	1
zmp_ph108	sa898	kdm2aa	ENSDARG00000059653	14	0.837352	1	2421	91	220	6	0.0375878	0.0272727	0.0119425	1	1
zmp_ph108	sa898	kdm2aa	ENSDARG00000059653	15	0.921415	1	2421	77	220	4	0.031805	0.0181818	0.00623377	1	1
zmp_ph108	sa898	kdm2aa	ENSDARG00000059653	16	0.363345	1	2421	95	220	10	0.03924	0.0454545	0.0248649	1	1
zmp_ph108	sa898	kdm2aa	ENSDARG00000059653	17	0.984264	1	2421	85	220	3	0.0351095	0.0136364	0.00372682	1	1
zmp_ph108	sa898	kdm2aa	ENSDARG00000059653	18	0.977429	1	2421	80	220	3	0.0330442	0.0136364	0.00372682	1	1
zmp_ph108	sa898	kdm2aa	ENSDARG00000059653	19	0.230768	1	2421	123	220	14	0.0508055	0.0636364	0.0388788	1	1
zmp_ph108	sa898	kdm2aa	ENSDARG00000059653	20	0.954746	1	2421	86	220	4	0.0355225	0.0181818	0.00623377	1	1
zmp_ph108	sa898	kdm2aa	ENSDARG00000059653	21	0.918146	1	2421	105	220	6	0.0433705	0.0272727	0.0119425	1	1
zmp_ph108	sa898	kdm2aa	ENSDARG00000059653	22	0.466944	1	2421	71	220	7	0.0293267	0.0318182	0.0150266	1	1
zmp_ph108	sa898	kdm2aa	ENSDARG00000059653	23	0.883501	1	2421	98	220	6	0.0404791	0.0272727	0.0119425	1	1
zmp_ph108	sa898	kdm2aa	ENSDARG00000059653	24	0.305395	1	2421	60	220	7	0.0247831	0.0318182	0.0150266	1	1
zmp_ph108	sa898	kdm2aa	ENSDARG00000059653	25	0.279372	1	2421	68	220	8	0.0280876	0.0363636	0.0182206	1	1
zmp_ph111	sa898	kdm2aa	ENSDARG00000059653	1	0.00245254	0.0613134	6218	269	431	32	0.0432615	0.0742459	0.0545502	1	1
zmp_ph111	sa898	kdm2aa	ENSDARG00000059653	2	0.591797	1	6218	313	431	21	0.0503377	0.0487239	0.0328783	1	1
zmp_ph111	sa898	kdm2aa	ENSDARG00000059653	3	0.140974	1	6218	351	431	30	0.056449	0.0696056	0.0505432	1	1
zmp_ph111	sa898	kdm2aa	ENSDARG00000059653	4	0.0293152	0.732881	6218	204	431	22	0.032808	0.0510441	0.0348056	1	1
zmp_ph111	sa898	kdm2aa	ENSDARG00000059653	5	0.869267	1	6218	343	431	19	0.0551624	0.0440835	0.0290568	1	1
zmp_ph111	sa898	kdm2aa	ENSDARG00000059653	6	0.850714	1	6218	305	431	17	0.0490511	0.0394432	0.0252855	1	1
zmp_ph111	sa898	kdm2aa	ENSDARG00000059653	7	0.318516	1	6218	310	431	24	0.0498553	0.0556845	0.03869	1	1
zmp_ph111	sa898	kdm2aa	ENSDARG00000059653	8	0.253221	1	6218	244	431	20	0.0392409	0.0464037	0.0309617	1	1
zmp_ph111	sa898	kdm2aa	ENSDARG00000059653	9	0.610485	1	6218	227	431	15	0.0365069	0.0348028	0.0215731	1	1
zmp_ph111	sa898	kdm2aa	ENSDARG00000059653	10	0.908672	1	6218	241	431	12	0.0387584	0.0278422	0.0161422	1	1
zmp_ph111	sa898	kdm2aa	ENSDARG00000059653	11	0.257656	1	6218	218	431	18	0.0350595	0.0417633	0.0271644	1	1
zmp_ph111	sa898	kdm2aa	ENSDARG00000059653	12	0.844378	1	6218	222	431	12	0.0357028	0.0278422	0.0161422	1	1
zmp_ph111	sa898	kdm2aa	ENSDARG00000059653	13	0.728154	1	6218	246	431	15	0.0395626	0.0348028	0.0215731	1	1
zmp_ph111	sa898	kdm2aa	ENSDARG00000059653	14	0.779214	1	6218	240	431	14	0.0385976	0.0324826	0.0197425	1	1
zmp_ph111	sa898	kdm2aa	ENSDARG00000059653	15	0.452127	1	6218	205	431	15	0.0329688	0.0348028	0.0215731	1	1
zmp_ph111	sa898	kdm2aa	ENSDARG00000059653	16	0.923271	1	6218	264	431	13	0.0424574	0.0301624	0.0179315	1	1
zmp_ph111	sa898	kdm2aa	ENSDARG00000059653	17	0.750134	1	6218	203	431	12	0.0326472	0.0278422	0.0161422	1	1
zmp_ph111	sa898	kdm2aa	ENSDARG00000059653	18	0.665394	1	6218	205	431	13	0.0329688	0.0301624	0.0179315	1	1
zmp_ph111	sa898	kdm2aa	ENSDARG00000059653	19	0.127774	1	6218	295	431	26	0.0474429	0.0603248	0.0426102	1	1
zmp_ph111	sa898	kdm2aa	ENSDARG00000059653	20	0.979347	1	6218	268	431	11	0.0431007	0.025522	0.0143775	1	1
zmp_ph111	sa898	kdm2aa	ENSDARG00000059653	21	0.413345	1	6218	256	431	19	0.0411708	0.0440835	0.0290568	1	1
zmp_ph111	sa898	kdm2aa	ENSDARG00000059653	22	0.738334	1	6218	201	431	12	0.0323255	0.0278422	0.0161422	1	1
zmp_ph111	sa898	kdm2aa	ENSDARG00000059653	23	0.728154	1	6218	246	431	15	0.0395626	0.0348028	0.0215731	1	1
zmp_ph111	sa898	kdm2aa	ENSDARG00000059653	24	0.172623	1	6218	177	431	16	0.0284657	0.037123	0.0234213	1	1
zmp_ph111	sa898	kdm2aa	ENSDARG00000059653	25	0.886102	1	6218	165	431	8	0.0265359	0.0185615	0.00926884	1	1
zmp_ph114	sa9360	kdm2aa	ENSDARG00000059653	1	0.183736	1	3752	157	297	16	0.0418443	0.0538721	0.0340793	1	1
zmp_ph114	sa9360	kdm2aa	ENSDARG00000059653	2	0.499213	1	3752	185	297	15	0.049307	0.0505051	0.0313864	1	1
zmp_ph114	sa9360	kdm2aa	ENSDARG00000059653	3	0.676531	1	3752	234	297	17	0.0623667	0.0572391	0.036796	1	1
zmp_ph114	sa9360	kdm2aa	ENSDARG00000059653	4	0.718505	1	3752	118	297	8	0.0314499	0.026936	0.0134723	1	1
zmp_ph114	sa9360	kdm2aa	ENSDARG00000059653	5	0.183545	1	3752	191	297	19	0.0509062	0.0639731	0.0422935	1	1
zmp_ph114	sa9360	kdm2aa	ENSDARG00000059653	6	0.844682	1	3752	194	297	12	0.0517058	0.040404	0.0234763	1	1
zmp_ph114	sa9360	kdm2aa	ENSDARG00000059653	7	0.889674	1	3752	190	297	11	0.0506397	0.037037	0.020907	1	1
zmp_ph114	sa9360	kdm2aa	ENSDARG00000059653	8	0.991203	1	3752	147	297	5	0.0391791	0.016835	0.00665632	1	1
zmp_ph114	sa9360	kdm2aa	ENSDARG00000059653	9	0.000186036	0.00465089	3752	150	297	26	0.0399787	0.0875421	0.0620648	1	1
zmp_ph114	sa9360	kdm2aa	ENSDARG00000059653	10	0.354267	1	3752	144	297	13	0.0383795	0.043771	0.0260819	1	1
zmp_ph114	sa9360	kdm2aa	ENSDARG00000059653	11	0.713855	1	3752	145	297	10	0.0386461	0.03367	0.0183787	1	1
zmp_ph114	sa9360	kdm2aa	ENSDARG00000059653	12	0.217953	1	3752	128	297	13	0.0341151	0.043771	0.0260819	1	1
zmp_ph114	sa9360	kdm2aa	ENSDARG00000059653	13	0.672574	1	3752	140	297	10	0.0373134	0.03367	0.0183787	1	1
zmp_ph114	sa9360	kdm2aa	ENSDARG00000059653	14	0.580631	1	3752	143	297	11	0.038113	0.037037	0.020907	1	1
zmp_ph114	sa9360	kdm2aa	ENSDARG00000059653	15	0.982601	1	3752	116	297	4	0.0309168	0.013468	0.00461312	1	1
zmp_ph114	sa9360	kdm2aa	ENSDARG00000059653	16	0.701014	1	3752	157	297	11	0.0418443	0.037037	0.020907	1	1
zmp_ph114	sa9360	kdm2aa	ENSDARG00000059653	17	0.180738	1	3752	123	297	13	0.0327825	0.043771	0.0260819	1	1
zmp_ph114	sa9360	kdm2aa	ENSDARG00000059653	18	0.884643	1	3752	113	297	6	0.0301173	0.020202	0.00883367	1	1
zmp_ph114	sa9360	kdm2aa	ENSDARG00000059653	19	0.345401	1	3752	179	297	16	0.0477079	0.0538721	0.0340793	1	1
zmp_ph114	sa9360	kdm2aa	ENSDARG00000059653	20	0.78597	1	3752	155	297	10	0.0413113	0.03367	0.0183787	1	1
zmp_ph114	sa9360	kdm2aa	ENSDARG00000059653	21	0.649519	1	3752	164	297	12	0.04371	0.040404	0.0234763	1	1
zmp_ph114	sa9360	kdm2aa	ENSDARG00000059653	22	0.363459	1	3752	121	297	11	0.0322495	0.037037	0.020907	1	1
zmp_ph114	sa9360	kdm2aa	ENSDARG00000059653	23	0.840223	1	3752	135	297	8	0.0359808	0.026936	0.0134723	1	1
zmp_ph114	sa9360	kdm2aa	ENSDARG00000059653	24	0.363001	1	3752	109	297	10	0.0290512	0.03367	0.0183787	1	1
zmp_ph114	sa9360	kdm2aa	ENSDARG00000059653	25	0.415791	1	3752	114	297	10	0.0303838	0.03367	0.0183787	1	1
zmp_ph150	sox10_baz1 X sox10_t3	sox10	ENSDARG00000077467	1	1	1	3476	152	7	0	0.0437284	0	0	1	3
zmp_ph150	sox10_baz1 X sox10_t3	sox10	ENSDARG00000077467	2	1	1	3476	180	7	0	0.0517837	0	0	1	3
zmp_ph150	sox10_baz1 X sox10_t3	sox10	ENSDARG00000077467	3	0.0604207	1	3476	206	7	2	0.0592635	0.285714	0.0533755	1	3
zmp_ph150	sox10_baz1 X sox10_t3	sox10	ENSDARG00000077467	4	1	1	3476	108	7	0	0.0310702	0	0	1	3
zmp_ph150	sox10_baz1 X sox10_t3	sox10	ENSDARG00000077467	5	1	1	3476	189	7	0	0.0543728	0	0	1	3
zmp_ph150	sox10_baz1 X sox10_t3	sox10	ENSDARG00000077467	6	1	1	3476	169	7	0	0.0486191	0	0	1	3
zmp_ph150	sox10_baz1 X sox10_t3	sox10	ENSDARG00000077467	7	1	1	3476	174	7	0	0.0500575	0	0	1	3
zmp_ph150	sox10_baz1 X sox10_t3	sox10	ENSDARG00000077467	8	0.240572	1	3476	134	7	1	0.0385501	0.142857	0.00730083	1	3
zmp_ph150	sox10_baz1 X sox10_t3	sox10	ENSDARG00000077467	9	1	1	3476	106	7	0	0.0304948	0	0	1	3
zmp_ph150	sox10_baz1 X sox10_t3	sox10	ENSDARG00000077467	10	1	1	3476	120	7	0	0.0345224	0	0	1	3
zmp_ph150	sox10_baz1 X sox10_t3	sox10	ENSDARG00000077467	11	1	1	3476	128	7	0	0.0368239	0	0	1	3
zmp_ph150	sox10_baz1 X sox10_t3	sox10	ENSDARG00000077467	12	0.209829	1	3476	115	7	1	0.033084	0.142857	0.00730083	1	3
zmp_ph150	sox10_baz1 X sox10_t3	sox10	ENSDARG00000077467	13	1	1	3476	130	7	0	0.0373993	0	0	1	3
zmp_ph150	sox10_baz1 X sox10_t3	sox10	ENSDARG00000077467	14	0.259455	1	3476	146	7	1	0.0420023	0.142857	0.00730083	1	3
zmp_ph150	sox10_baz1 X sox10_t3	sox10	ENSDARG00000077467	15	0.196569	1	3476	107	7	1	0.0307825	0.142857	0.00730083	1	3
zmp_ph150	sox10_baz1 X sox10_t3	sox10	ENSDARG00000077467	16	1	1	3476	150	7	0	0.043153	0	0	1	3
zmp_ph150	sox10_baz1 X sox10_t3	sox10	ENSDARG00000077467	17	1	1	3476	113	7	0	0.0325086	0	0	1	3
zmp_ph150	sox10_baz1 X sox10_t3	sox10	ENSDARG00000077467	18	1	1	3476	113	7	0	0.0325086	0	0	1	3
zmp_ph150	sox10_baz1 X sox10_t3	sox10	ENSDARG00000077467	19	1	1	3476	179	7	0	0.051496	0	0	1	3
zmp_ph150	sox10_baz1 X sox10_t3	sox10	ENSDARG00000077467	20	1	1	3476	129	7	0	0.0371116	0	0	1	3
zmp_ph150	sox10_baz1 X sox10_t3	sox10	ENSDARG00000077467	21	0.291534	1	3476	167	7	1	0.0480437	0.142857	0.00730083	1	3
zmp_ph150	sox10_baz1 X sox10_t3	sox10	ENSDARG00000077467	22	1	1	3476	130	7	0	0.0373993	0	0	1	3
zmp_ph150	sox10_baz1 X sox10_t3	sox10	ENSDARG00000077467	23	1	1	3476	148	7	0	0.0425777	0	0	1	3
zmp_ph150	sox10_baz1 X sox10_t3	sox10	ENSDARG00000077467	24	1	1	3476	87	7	0	0.0250288	0	0	1	3
zmp_ph150	sox10_baz1 X sox10_t3	sox10	ENSDARG00000077467	25	1	1	3476	96	7	0	0.027618	0	0	1	3
zmp_ph151	w2	mitfa	ENSDARG00000003732	1	1	1	10774	445	7	0	0.0413031	0	0	1	6
zmp_ph151	w2	mitfa	ENSDARG00000003732	2	1	1	10774	498	7	0	0.0462224	0	0	1	6
zmp_ph151	w2	mitfa	ENSDARG00000003732	3	1	1	10774	576	7	0	0.053462	0	0	1	6
zmp_ph151	w2	mitfa	ENSDARG00000003732	4	0.270666	1	10774	475	7	1	0.0440876	0.142857	0.00730083	1	6
zmp_ph151	w2	mitfa	ENSDARG00000003732	5	1	1	10774	667	7	0	0.0619083	0	0	1	6
zmp_ph151	w2	mitfa	ENSDARG00000003732	6	3.31354e-06	8.28385e-05	10774	477	7	5	0.0442733	0.714286	0.341261	1	6
zmp_ph151	w2	mitfa	ENSDARG00000003732	7	1	1	10774	568	7	0	0.0527195	0	0	1	6
zmp_ph151	w2	mitfa	ENSDARG00000003732	8	1	1	10774	446	7	0	0.041396	0	0	1	6
zmp_ph151	w2	mitfa	ENSDARG00000003732	9	1	1	10774	385	7	0	0.0357342	0	0	1	6
zmp_ph151	w2	mitfa	ENSDARG00000003732	10	1	1	10774	383	7	0	0.0355485	0	0	1	6
zmp_ph151	w2	mitfa	ENSDARG00000003732	11	1	1	10774	369	7	0	0.0342491	0	0	1	6
zmp_ph151	w2	mitfa	ENSDARG00000003732	12	1	1	10774	379	7	0	0.0351773	0	0	1	6
zmp_ph151	w2	mitfa	ENSDARG00000003732	13	1	1	10774	431	7	0	0.0400037	0	0	1	6
zmp_ph151	w2	mitfa	ENSDARG00000003732	14	1	1	10774	397	7	0	0.036848	0	0	1	6
zmp_ph151	w2	mitfa	ENSDARG00000003732	15	1	1	10774	352	7	0	0.0326712	0	0	1	6
zmp_ph151	w2	mitfa	ENSDARG00000003732	16	1	1	10774	464	7	0	0.0430666	0	0	1	6
zmp_ph151	w2	mitfa	ENSDARG00000003732	17	1	1	10774	389	7	0	0.0361054	0	0	1	6
zmp_ph151	w2	mitfa	ENSDARG00000003732	18	1	1	10774	340	7	0	0.0315575	0	0	1	6
zmp_ph151	w2	mitfa	ENSDARG00000003732	19	1	1	10774	463	7	0	0.0429738	0	0	1	6
zmp_ph151	w2	mitfa	ENSDARG00000003732	20	1	1	10774	448	7	0	0.0415816	0	0	1	6
zmp_ph151	w2	mitfa	ENSDARG00000003732	21	0.236798	1	10774	408	7	1	0.0378689	0.142857	0.00730083	1	6
zmp_ph151	w2	mitfa	ENSDARG00000003732	22	1	1	10774	379	7	0	0.0351773	0	0	1	6
zmp_ph151	w2	mitfa	ENSDARG00000003732	23	1	1	10774	419	7	0	0.0388899	0	0	1	6
zmp_ph151	w2	mitfa	ENSDARG00000003732	24	1	1	10774	292	7	0	0.0271023	0	0	1	6
zmp_ph151	w2	mitfa	ENSDARG00000003732	25	1	1	10774	324	7	0	0.0300724	0	0	1	6
zmp_ph152	sox10_baz1 X sox10_t3	sox10	ENSDARG00000077467	1	0.832449	1	2816	123	40	1	0.043679	0.025	0.00128151	1	3
zmp_ph152	sox10_baz1 X sox10_t3	sox10	ENSDARG00000077467	2	0.292578	1	2816	133	40	3	0.0472301	0.075	0.0207536	1	3
zmp_ph152	sox10_baz1 X sox10_t3	sox10	ENSDARG00000077467	3	0.00237386	0.0593464	2816	170	40	8	0.0603693	0.2	0.103606	1	3
zmp_ph152	sox10_baz1 X sox10_t3	sox10	ENSDARG00000077467	4	1	1	2816	84	40	0	0.0298295	0	0	1	3
zmp_ph152	sox10_baz1 X sox10_t3	sox10	ENSDARG00000077467	5	0.387073	1	2816	157	40	3	0.0557528	0.075	0.0207536	1	3
zmp_ph152	sox10_baz1 X sox10_t3	sox10	ENSDARG00000077467	6	0.882878	1	2816	147	40	1	0.0522017	0.025	0.00128151	1	3
zmp_ph152	sox10_baz1 X sox10_t3	sox10	ENSDARG00000077467	7	0.589782	1	2816	138	40	2	0.0490057	0.05	0.00895695	1	3
zmp_ph152	sox10_baz1 X sox10_t3	sox10	ENSDARG00000077467	8	1	1	2816	115	40	0	0.0408381	0	0	1	3
zmp_ph152	sox10_baz1 X sox10_t3	sox10	ENSDARG00000077467	9	1	1	2816	89	40	0	0.0316051	0	0	1	3
zmp_ph152	sox10_baz1 X sox10_t3	sox10	ENSDARG00000077467	10	1	1	2816	93	40	0	0.0330256	0	0	1	3
zmp_ph152	sox10_baz1 X sox10_t3	sox10	ENSDARG00000077467	11	0.771394	1	2816	102	40	1	0.0362216	0.025	0.00128151	1	3
zmp_ph152	sox10_baz1 X sox10_t3	sox10	ENSDARG00000077467	12	0.377381	1	2816	92	40	2	0.0326705	0.05	0.00895695	1	3
zmp_ph152	sox10_baz1 X sox10_t3	sox10	ENSDARG00000077467	13	0.774739	1	2816	103	40	1	0.0365767	0.025	0.00128151	1	3
zmp_ph152	sox10_baz1 X sox10_t3	sox10	ENSDARG00000077467	14	1	1	2816	111	40	0	0.0394176	0	0	1	3
zmp_ph152	sox10_baz1 X sox10_t3	sox10	ENSDARG00000077467	15	0.697811	1	2816	83	40	1	0.0294744	0.025	0.00128151	1	3
zmp_ph152	sox10_baz1 X sox10_t3	sox10	ENSDARG00000077467	16	1	1	2816	132	40	0	0.046875	0	0	1	3
zmp_ph152	sox10_baz1 X sox10_t3	sox10	ENSDARG00000077467	17	0.723242	1	2816	89	40	1	0.0316051	0.025	0.00128151	1	3
zmp_ph152	sox10_baz1 X sox10_t3	sox10	ENSDARG00000077467	18	0.746583	1	2816	95	40	1	0.0337358	0.025	0.00128151	1	3
zmp_ph152	sox10_baz1 X sox10_t3	sox10	ENSDARG00000077467	19	0.165266	1	2816	151	40	4	0.0536222	0.1	0.0348849	1	3
zmp_ph152	sox10_baz1 X sox10_t3	sox10	ENSDARG00000077467	20	0.781287	1	2816	105	40	1	0.0372869	0.025	0.00128151	1	3
zmp_ph152	sox10_baz1 X sox10_t3	sox10	ENSDARG00000077467	21	0.844452	1	2816	128	40	1	0.0454545	0.025	0.00128151	1	3
zmp_ph152	sox10_baz1 X sox10_t3	sox10	ENSDARG00000077467	22	0.427727	1	2816	102	40	2	0.0362216	0.05	0.00895695	1	3
zmp_ph152	sox10_baz1 X sox10_t3	sox10	ENSDARG00000077467	23	0.095976	1	2816	123	40	4	0.043679	0.1	0.0348849	1	3
zmp_ph152	sox10_baz1 X sox10_t3	sox10	ENSDARG00000077467	24	0.314961	1	2816	80	40	2	0.0284091	0.05	0.00895695	1	3
zmp_ph152	sox10_baz1 X sox10_t3	sox10	ENSDARG00000077467	25	0.639929	1	2816	71	40	1	0.0252131	0.025	0.00128151	1	3
zmp_ph155_kitlga	tc244b	kitlga	ENSDARG00000070917	1	0.17068	1	9626	440	4	1	0.0457095	0.25	0.0127415	1	25
zmp_ph155_kitlga	tc244b	kitlga	ENSDARG00000070917	2	1	1	9626	455	4	0	0.0472678	0	0	1	25
zmp_ph155_kitlga	tc244b	kitlga	ENSDARG00000070917	3	1	1	9626	517	4	0	0.0537087	0	0	1	25
zmp_ph155_kitlga	tc244b	kitlga	ENSDARG00000070917	4	1	1	9626	316	4	0	0.0328278	0	0	1	25
zmp_ph155_kitlga	tc244b	kitlga	ENSDARG00000070917	5	1	1	9626	564	4	0	0.0585913	0	0	1	25
zmp_ph155_kitlga	tc244b	kitlga	ENSDARG00000070917	6	1	1	9626	441	4	0	0.0458134	0	0	1	25
zmp_ph155_kitlga	tc244b	kitlga	ENSDARG00000070917	7	1	1	9626	486	4	0	0.0504883	0	0	1	25
zmp_ph155_kitlga	tc244b	kitlga	ENSDARG00000070917	8	1	1	9626	405	4	0	0.0420736	0	0	1	25
zmp_ph155_kitlga	tc244b	kitlga	ENSDARG00000070917	9	1	1	9626	357	4	0	0.0370871	0	0	1	25
zmp_ph155_kitlga	tc244b	kitlga	ENSDARG00000070917	10	1	1	9626	340	4	0	0.035321	0	0	1	25
zmp_ph155_kitlga	tc244b	kitlga	ENSDARG00000070917	11	1	1	9626	345	4	0	0.0358404	0	0	1	25
zmp_ph155_kitlga	tc244b	kitlga	ENSDARG00000070917	12	1	1	9626	363	4	0	0.0377104	0	0	1	25
zmp_ph155_kitlga	tc244b	kitlga	ENSDARG00000070917	13	1	1	9626	377	4	0	0.0391648	0	0	1	25
zmp_ph155_kitlga	tc244b	kitlga	ENSDARG00000070917	14	1	1	9626	359	4	0	0.0372948	0	0	1	25
zmp_ph155_kitlga	tc244b	kitlga	ENSDARG00000070917	15	1	1	9626	314	4	0	0.03262	0	0	1	25
zmp_ph155_kitlga	tc244b	kitlga	ENSDARG00000070917	16	0.167425	1	9626	431	4	1	0.0447746	0.25	0.0127415	1	25
zmp_ph155_kitlga	tc244b	kitlga	ENSDARG00000070917	17	1	1	9626	335	4	0	0.0348016	0	0	1	25
zmp_ph155_kitlga	tc244b	kitlga	ENSDARG00000070917	18	1	1	9626	316	4	0	0.0328278	0	0	1	25
zmp_ph155_kitlga	tc244b	kitlga	ENSDARG00000070917	19	0.168511	1	9626	434	4	1	0.0450862	0.25	0.0127415	1	25
zmp_ph155_kitlga	tc244b	kitlga	ENSDARG00000070917	20	1	1	9626	403	4	0	0.0418658	0	0	1	25
zmp_ph155_kitlga	tc244b	kitlga	ENSDARG00000070917	21	1	1	9626	373	4	0	0.0387492	0	0	1	25
zmp_ph155_kitlga	tc244b	kitlga	ENSDARG00000070917	22	1	1	9626	298	4	0	0.0309578	0	0	1	25
zmp_ph155_kitlga	tc244b	kitlga	ENSDARG00000070917	23	1	1	9626	400	4	0	0.0415541	0	0	1	25
zmp_ph155_kitlga	tc244b	kitlga	ENSDARG00000070917	24	1	1	9626	266	4	0	0.0276335	0	0	1	25
zmp_ph155_kitlga	tc244b	kitlga	ENSDARG00000070917	25	0.115549	1	9626	291	4	1	0.0302306	0.25	0.0127415	1	25
zmp_ph155_mitfa	w2	mitfa	ENSDARG00000003732	1	0.309378	1	12127	563	42	3	0.0464253	0.0714286	0.0197508	1	6
zmp_ph155_mitfa	w2	mitfa	ENSDARG00000003732	2	0.863211	1	12127	561	42	1	0.0462604	0.0238095	0.00122052	1	6
zmp_ph155_mitfa	w2	mitfa	ENSDARG00000003732	3	0.899285	1	12127	645	42	1	0.0531871	0.0238095	0.00122052	1	6
zmp_ph155_mitfa	w2	mitfa	ENSDARG00000003732	4	0.422356	1	12127	414	42	2	0.0341387	0.047619	0.00852706	1	6
zmp_ph155_mitfa	w2	mitfa	ENSDARG00000003732	5	0.45565	1	12127	717	42	3	0.0591243	0.0714286	0.0197508	1	6
zmp_ph155_mitfa	w2	mitfa	ENSDARG00000003732	6	0.00220195	0.0550486	12127	533	42	7	0.0439515	0.166667	0.0809325	1	6
zmp_ph155_mitfa	w2	mitfa	ENSDARG00000003732	7	0.892042	1	12127	626	42	1	0.0516204	0.0238095	0.00122052	1	6
zmp_ph155_mitfa	w2	mitfa	ENSDARG00000003732	8	0.517982	1	12127	497	42	2	0.0409829	0.047619	0.00852706	1	6
zmp_ph155_mitfa	w2	mitfa	ENSDARG00000003732	9	0.793482	1	12127	447	42	1	0.0368599	0.0238095	0.00122052	1	6
zmp_ph155_mitfa	w2	mitfa	ENSDARG00000003732	10	1	1	12127	423	42	0	0.0348808	0	0	1	6
zmp_ph155_mitfa	w2	mitfa	ENSDARG00000003732	11	0.442715	1	12127	431	42	2	0.0355405	0.047619	0.00852706	1	6
zmp_ph155_mitfa	w2	mitfa	ENSDARG00000003732	12	0.79934	1	12127	455	42	1	0.0375196	0.0238095	0.00122052	1	6
zmp_ph155_mitfa	w2	mitfa	ENSDARG00000003732	13	1	1	12127	483	42	0	0.0398285	0	0	1	6
zmp_ph155_mitfa	w2	mitfa	ENSDARG00000003732	14	0.797891	1	12127	453	42	1	0.0373547	0.0238095	0.00122052	1	6
zmp_ph155_mitfa	w2	mitfa	ENSDARG00000003732	15	0.171418	1	12127	413	42	3	0.0340562	0.0714286	0.0197508	1	6
zmp_ph155_mitfa	w2	mitfa	ENSDARG00000003732	16	0.560364	1	12127	537	42	2	0.0442814	0.047619	0.00852706	1	6
zmp_ph155_mitfa	w2	mitfa	ENSDARG00000003732	17	1	1	12127	437	42	0	0.0360353	0	0	1	6
zmp_ph155_mitfa	w2	mitfa	ENSDARG00000003732	18	0.395497	1	12127	392	42	2	0.0323246	0.047619	0.00852706	1	6
zmp_ph155_mitfa	w2	mitfa	ENSDARG00000003732	19	0.844139	1	12127	525	42	1	0.0432918	0.0238095	0.00122052	1	6
zmp_ph155_mitfa	w2	mitfa	ENSDARG00000003732	20	0.255218	1	12127	506	42	3	0.0417251	0.0714286	0.0197508	1	6
zmp_ph155_mitfa	w2	mitfa	ENSDARG00000003732	21	0.0755082	1	12127	463	42	4	0.0381793	0.0952381	0.0331894	1	6
zmp_ph155_mitfa	w2	mitfa	ENSDARG00000003732	22	0.753782	1	12127	398	42	1	0.0328193	0.0238095	0.00122052	1	6
zmp_ph155_mitfa	w2	mitfa	ENSDARG00000003732	23	1	1	12127	498	42	0	0.0410654	0	0	1	6
zmp_ph155_mitfa	w2	mitfa	ENSDARG00000003732	24	1	1	12127	339	42	0	0.0279542	0	0	1	6
zmp_ph155_mitfa	w2	mitfa	ENSDARG00000003732	25	0.728818	1	12127	371	42	1	0.0305929	0.0238095	0.00122052	1	6
zmp_ph162	sa24445	tfap2a	ENSDARG00000059279	1	0.843749	1	6392	294	71	2	0.045995	0.028169	0.00502805	1	24
zmp_ph162	sa24445	tfap2a	ENSDARG00000059279	2	0.694259	1	6392	319	71	3	0.0499061	0.0422535	0.0116143	1	24
zmp_ph162	sa24445	tfap2a	ENSDARG00000059279	3	0.0147409	0.368522	6392	348	71	9	0.0544431	0.126761	0.0677504	1	24
zmp_ph162	sa24445	tfap2a	ENSDARG00000059279	4	0.908805	1	6392	212	71	1	0.0331665	0.0140845	0.00072218	1	24
zmp_ph162	sa24445	tfap2a	ENSDARG00000059279	5	0.986649	1	6392	377	71	1	0.05898	0.0140845	0.00072218	1	24
zmp_ph162	sa24445	tfap2a	ENSDARG00000059279	6	0.0363701	0.909254	6392	281	71	7	0.0439612	0.0985915	0.0471931	1	24
zmp_ph162	sa24445	tfap2a	ENSDARG00000059279	7	0.88291	1	6392	326	71	2	0.0510013	0.028169	0.00502805	1	24
zmp_ph162	sa24445	tfap2a	ENSDARG00000059279	8	0.952766	1	6392	269	71	1	0.0420839	0.0140845	0.00072218	1	24
zmp_ph162	sa24445	tfap2a	ENSDARG00000059279	9	0.905608	1	6392	209	71	1	0.0326971	0.0140845	0.00072218	1	24
zmp_ph162	sa24445	tfap2a	ENSDARG00000059279	10	0.933172	1	6392	239	71	1	0.0373905	0.0140845	0.00072218	1	24
zmp_ph162	sa24445	tfap2a	ENSDARG00000059279	11	0.259702	1	6392	233	71	4	0.0364518	0.056338	0.0194705	1	24
zmp_ph162	sa24445	tfap2a	ENSDARG00000059279	12	1	1	6392	230	71	0	0.0359825	0	0	1	24
zmp_ph162	sa24445	tfap2a	ENSDARG00000059279	13	0.778699	1	6392	254	71	2	0.0397372	0.028169	0.00502805	1	24
zmp_ph162	sa24445	tfap2a	ENSDARG00000059279	14	0.576331	1	6392	268	71	3	0.0419274	0.0422535	0.0116143	1	24
zmp_ph162	sa24445	tfap2a	ENSDARG00000059279	15	0.9023	1	6392	206	71	1	0.0322278	0.0140845	0.00072218	1	24
zmp_ph162	sa24445	tfap2a	ENSDARG00000059279	16	0.188459	1	6392	274	71	5	0.0428661	0.0704225	0.0281569	1	24
zmp_ph162	sa24445	tfap2a	ENSDARG00000059279	17	0.0816592	1	6392	208	71	5	0.0325407	0.0704225	0.0281569	1	24
zmp_ph162	sa24445	tfap2a	ENSDARG00000059279	18	0.903415	1	6392	207	71	1	0.0323842	0.0140845	0.00072218	1	24
zmp_ph162	sa24445	tfap2a	ENSDARG00000059279	19	0.0158718	0.396794	6392	293	71	8	0.0458385	0.112676	0.0573161	1	24
zmp_ph162	sa24445	tfap2a	ENSDARG00000059279	20	0.950525	1	6392	265	71	1	0.0414581	0.0140845	0.00072218	1	24
zmp_ph162	sa24445	tfap2a	ENSDARG00000059279	21	0.347434	1	6392	268	71	4	0.0419274	0.056338	0.0194705	1	24
zmp_ph162	sa24445	tfap2a	ENSDARG00000059279	22	0.666041	1	6392	204	71	2	0.0319149	0.028169	0.00502805	1	24
zmp_ph162	sa24445	tfap2a	ENSDARG00000059279	23	0.948775	1	6392	262	71	1	0.0409887	0.0140845	0.00072218	1	24
zmp_ph162	sa24445	tfap2a	ENSDARG00000059279	24	0.0313322	0.783304	6392	158	71	5	0.0247184	0.0704225	0.0281569	1	24
zmp_ph162	sa24445	tfap2a	ENSDARG00000059279	25	0.879916	1	6392	188	71	1	0.0294118	0.0140845	0.00072218	1	24
zmp_ph163	w2	mitfa	ENSDARG00000003732	1	0.968608	1	13506	606	116	2	0.0448689	0.0172414	0.00307203	1	6
zmp_ph163	w2	mitfa	ENSDARG00000003732	2	0.776804	1	13506	613	116	4	0.0453872	0.0344828	0.0118627	1	6
zmp_ph163	w2	mitfa	ENSDARG00000003732	3	0.985399	1	13506	706	116	2	0.0522731	0.0172414	0.00307203	1	6
zmp_ph163	w2	mitfa	ENSDARG00000003732	4	0.015283	0.382076	13506	525	116	10	0.0388716	0.0862069	0.0475165	1	6
zmp_ph163	w2	mitfa	ENSDARG00000003732	5	0.830663	1	13506	809	116	5	0.0598993	0.0431034	0.0171353	1	6
zmp_ph163	w2	mitfa	ENSDARG00000003732	6	2.4605e-33	6.15124e-32	13506	618	116	48	0.0457574	0.413793	0.336617	1	6
zmp_ph163	w2	mitfa	ENSDARG00000003732	7	0.99776	1	13506	692	116	1	0.0512365	0.00862069	0.000442086	1	6
zmp_ph163	w2	mitfa	ENSDARG00000003732	8	0.35762	1	13506	565	116	6	0.0418333	0.0517241	0.0227627	1	6
zmp_ph163	w2	mitfa	ENSDARG00000003732	9	0.619912	1	13506	496	116	4	0.0367244	0.0344828	0.0118627	1	6
zmp_ph163	w2	mitfa	ENSDARG00000003732	10	0.767373	1	13506	466	116	3	0.0345032	0.0258621	0.00708536	1	6
zmp_ph163	w2	mitfa	ENSDARG00000003732	11	0.759666	1	13506	460	116	3	0.0340589	0.0258621	0.00708536	1	6
zmp_ph163	w2	mitfa	ENSDARG00000003732	12	0.986127	1	13506	489	116	1	0.0362061	0.00862069	0.000442086	1	6
zmp_ph163	w2	mitfa	ENSDARG00000003732	13	1	1	13506	525	116	0	0.0388716	0	0	1	6
zmp_ph163	w2	mitfa	ENSDARG00000003732	14	0.92726	1	13506	492	116	2	0.0364283	0.0172414	0.00307203	1	6
zmp_ph163	w2	mitfa	ENSDARG00000003732	15	0.567013	1	13506	464	116	4	0.0343551	0.0344828	0.0118627	1	6
zmp_ph163	w2	mitfa	ENSDARG00000003732	16	1	1	13506	604	116	0	0.0447209	0	0	1	6
zmp_ph163	w2	mitfa	ENSDARG00000003732	17	0.987197	1	13506	498	116	1	0.0368725	0.00862069	0.000442086	1	6
zmp_ph163	w2	mitfa	ENSDARG00000003732	18	0.519474	1	13506	437	116	4	0.032356	0.0344828	0.0118627	1	6
zmp_ph163	w2	mitfa	ENSDARG00000003732	19	0.550731	1	13506	574	116	5	0.0424996	0.0431034	0.0171353	1	6
zmp_ph163	w2	mitfa	ENSDARG00000003732	20	0.867922	1	13506	565	116	3	0.0418333	0.0258621	0.00708536	1	6
zmp_ph163	w2	mitfa	ENSDARG00000003732	21	0.448111	1	13506	511	116	5	0.037835	0.0431034	0.0171353	1	6
zmp_ph163	w2	mitfa	ENSDARG00000003732	22	0.982041	1	13506	460	116	1	0.0340589	0.00862069	0.000442086	1	6
zmp_ph163	w2	mitfa	ENSDARG00000003732	23	0.991043	1	13506	538	116	1	0.0398341	0.00862069	0.000442086	1	6
zmp_ph163	w2	mitfa	ENSDARG00000003732	24	1	1	13506	384	116	0	0.0284318	0	0	1	6
zmp_ph163	w2	mitfa	ENSDARG00000003732	25	0.971762	1	13506	409	116	1	0.0302828	0.00862069	0.000442086	1	6
zmp_ph170	hu3332	bace2	ENSDARG00000044781	1	0.609261	1	3372	141	22	1	0.0418149	0.0454545	0.0023288	1	15
zmp_ph170	hu3332	bace2	ENSDARG00000044781	2	1	1	3372	177	22	0	0.0524911	0	0	1	15
zmp_ph170	hu3332	bace2	ENSDARG00000044781	3	0.375763	1	3372	199	22	2	0.0590154	0.0909091	0.0163975	1	15
zmp_ph170	hu3332	bace2	ENSDARG00000044781	4	0.463128	1	3372	94	22	1	0.0278766	0.0454545	0.0023288	1	15
zmp_ph170	hu3332	bace2	ENSDARG00000044781	5	0.704968	1	3372	182	22	1	0.0539739	0.0454545	0.0023288	1	15
zmp_ph170	hu3332	bace2	ENSDARG00000044781	6	1	1	3372	171	22	0	0.0507117	0	0	1	15
zmp_ph170	hu3332	bace2	ENSDARG00000044781	7	0.112812	1	3372	182	22	3	0.0539739	0.136364	0.0382235	1	15
zmp_ph170	hu3332	bace2	ENSDARG00000044781	8	0.581773	1	3372	131	22	1	0.0388493	0.0454545	0.0023288	1	15
zmp_ph170	hu3332	bace2	ENSDARG00000044781	9	0.167211	1	3372	113	22	2	0.0335113	0.0909091	0.0163975	1	15
zmp_ph170	hu3332	bace2	ENSDARG00000044781	10	0.527579	1	3372	113	22	1	0.0335113	0.0454545	0.0023288	1	15
zmp_ph170	hu3332	bace2	ENSDARG00000044781	11	0.202659	1	3372	128	22	2	0.0379597	0.0909091	0.0163975	1	15
zmp_ph170	hu3332	bace2	ENSDARG00000044781	12	0.524379	1	3372	112	22	1	0.0332147	0.0454545	0.0023288	1	15
zmp_ph170	hu3332	bace2	ENSDARG00000044781	13	1	1	3372	128	22	0	0.0379597	0	0	1	15
zmp_ph170	hu3332	bace2	ENSDARG00000044781	14	1	1	3372	146	22	0	0.0432977	0	0	1	15
zmp_ph170	hu3332	bace2	ENSDARG00000044781	15	0.00306805	0.0767013	3372	95	22	4	0.0281732	0.181818	0.0645956	1	15
zmp_ph170	hu3332	bace2	ENSDARG00000044781	16	1	1	3372	150	22	0	0.044484	0	0	1	15
zmp_ph170	hu3332	bace2	ENSDARG00000044781	17	1	1	3372	111	22	0	0.0329181	0	0	1	15
zmp_ph170	hu3332	bace2	ENSDARG00000044781	18	1	1	3372	105	22	0	0.0311388	0	0	1	15
zmp_ph170	hu3332	bace2	ENSDARG00000044781	19	1	1	3372	163	22	0	0.0483393	0	0	1	15
zmp_ph170	hu3332	bace2	ENSDARG00000044781	20	1	1	3372	132	22	0	0.0391459	0	0	1	15
zmp_ph170	hu3332	bace2	ENSDARG00000044781	21	0.624917	1	3372	147	22	1	0.0435943	0.0454545	0.0023288	1	15
zmp_ph170	hu3332	bace2	ENSDARG00000044781	22	0.552445	1	3372	121	22	1	0.0358837	0.0454545	0.0023288	1	15
zmp_ph170	hu3332	bace2	ENSDARG00000044781	23	1	1	3372	144	22	0	0.0427046	0	0	1	15
zmp_ph170	hu3332	bace2	ENSDARG00000044781	24	0.477358	1	3372	98	22	1	0.0290629	0.0454545	0.0023288	1	15
zmp_ph170	hu3332	bace2	ENSDARG00000044781	25	1	1	3372	89	22	0	0.0263938	0	0	1	15
zmp_ph172	hu3332	bace2	ENSDARG00000044781	1	1	1	4405	196	3	0	0.0444949	0	0	1	15
zmp_ph172	hu3332	bace2	ENSDARG00000044781	2	1	1	4405	214	3	0	0.0485812	0	0	1	15
zmp_ph172	hu3332	bace2	ENSDARG00000044781	3	1	1	4405	247	3	0	0.0560726	0	0	1	15
zmp_ph172	hu3332	bace2	ENSDARG00000044781	4	1	1	4405	133	3	0	0.030193	0	0	1	15
zmp_ph172	hu3332	bace2	ENSDARG00000044781	5	1	1	4405	222	3	0	0.0503973	0	0	1	15
zmp_ph172	hu3332	bace2	ENSDARG00000044781	6	1	1	4405	232	3	0	0.0526674	0	0	1	15
zmp_ph172	hu3332	bace2	ENSDARG00000044781	7	1	1	4405	243	3	0	0.0551646	0	0	1	15
zmp_ph172	hu3332	bace2	ENSDARG00000044781	8	1	1	4405	175	3	0	0.0397276	0	0	1	15
zmp_ph172	hu3332	bace2	ENSDARG00000044781	9	1	1	4405	167	3	0	0.0379115	0	0	1	15
zmp_ph172	hu3332	bace2	ENSDARG00000044781	10	0.106953	1	4405	163	3	1	0.0370034	0.333333	0.0169524	1	15
zmp_ph172	hu3332	bace2	ENSDARG00000044781	11	1	1	4405	157	3	0	0.0356413	0	0	1	15
zmp_ph172	hu3332	bace2	ENSDARG00000044781	12	1	1	4405	147	3	0	0.0333712	0	0	1	15
zmp_ph172	hu3332	bace2	ENSDARG00000044781	13	1	1	4405	151	3	0	0.0342792	0	0	1	15
zmp_ph172	hu3332	bace2	ENSDARG00000044781	14	1	1	4405	170	3	0	0.0385925	0	0	1	15
zmp_ph172	hu3332	bace2	ENSDARG00000044781	15	1	1	4405	139	3	0	0.0315551	0	0	1	15
zmp_ph172	hu3332	bace2	ENSDARG00000044781	16	1	1	4405	182	3	0	0.0413167	0	0	1	15
zmp_ph172	hu3332	bace2	ENSDARG00000044781	17	1	1	4405	139	3	0	0.0315551	0	0	1	15
zmp_ph172	hu3332	bace2	ENSDARG00000044781	18	1	1	4405	145	3	0	0.0329171	0	0	1	15
zmp_ph172	hu3332	bace2	ENSDARG00000044781	19	1	1	4405	209	3	0	0.0474461	0	0	1	15
zmp_ph172	hu3332	bace2	ENSDARG00000044781	20	1	1	4405	196	3	0	0.0444949	0	0	1	15
zmp_ph172	hu3332	bace2	ENSDARG00000044781	21	0.127633	1	4405	196	3	1	0.0444949	0.333333	0.0169524	1	15
zmp_ph172	hu3332	bace2	ENSDARG00000044781	22	1	1	4405	142	3	0	0.0322361	0	0	1	15
zmp_ph172	hu3332	bace2	ENSDARG00000044781	23	1	1	4405	177	3	0	0.0401816	0	0	1	15
zmp_ph172	hu3332	bace2	ENSDARG00000044781	24	1	1	4405	128	3	0	0.0290579	0	0	1	15
zmp_ph172	hu3332	bace2	ENSDARG00000044781	25	0.089152	1	4405	135	3	1	0.030647	0.333333	0.0169524	1	15
zmp_ph175	sa8962	pcna	ENSDARG00000054155	1	0.178828	1	6480	306	31	3	0.0472222	0.0967742	0.0269001	1	10
zmp_ph175	sa8962	pcna	ENSDARG00000054155	2	1	1	6480	312	31	0	0.0481481	0	0	1	10
zmp_ph175	sa8962	pcna	ENSDARG00000054155	3	0.82026	1	6480	349	31	1	0.053858	0.0322581	0.00165325	1	10
zmp_ph175	sa8962	pcna	ENSDARG00000054155	4	0.645166	1	6480	213	31	1	0.0328704	0.0322581	0.00165325	1	10
zmp_ph175	sa8962	pcna	ENSDARG00000054155	5	0.552678	1	6480	382	31	2	0.0589506	0.0645161	0.0115853	1	10
zmp_ph175	sa8962	pcna	ENSDARG00000054155	6	0.425444	1	6480	301	31	2	0.0464506	0.0645161	0.0115853	1	10
zmp_ph175	sa8962	pcna	ENSDARG00000054155	7	0.795064	1	6480	323	31	1	0.0498457	0.0322581	0.00165325	1	10
zmp_ph175	sa8962	pcna	ENSDARG00000054155	8	0.727301	1	6480	266	31	1	0.0410494	0.0322581	0.00165325	1	10
zmp_ph175	sa8962	pcna	ENSDARG00000054155	9	0.655547	1	6480	219	31	1	0.0337963	0.0322581	0.00165325	1	10
zmp_ph175	sa8962	pcna	ENSDARG00000054155	10	0.296357	1	6480	227	31	2	0.0350309	0.0645161	0.0115853	1	10
zmp_ph175	sa8962	pcna	ENSDARG00000054155	11	0.69421	1	6480	243	31	1	0.0375	0.0322581	0.00165325	1	10
zmp_ph175	sa8962	pcna	ENSDARG00000054155	12	1	1	6480	240	31	0	0.037037	0	0	1	10
zmp_ph175	sa8962	pcna	ENSDARG00000054155	13	0.716205	1	6480	258	31	1	0.0398148	0.0322581	0.00165325	1	10
zmp_ph175	sa8962	pcna	ENSDARG00000054155	14	0.125561	1	6480	259	31	3	0.0399691	0.0967742	0.0269001	1	10
zmp_ph175	sa8962	pcna	ENSDARG00000054155	15	1	1	6480	190	31	0	0.029321	0	0	1	10
zmp_ph175	sa8962	pcna	ENSDARG00000054155	16	0.761736	1	6480	293	31	1	0.045216	0.0322581	0.00165325	1	10
zmp_ph175	sa8962	pcna	ENSDARG00000054155	17	1	1	6480	221	31	0	0.0341049	0	0	1	10
zmp_ph175	sa8962	pcna	ENSDARG00000054155	18	0.650394	1	6480	216	31	1	0.0333333	0.0322581	0.00165325	1	10
zmp_ph175	sa8962	pcna	ENSDARG00000054155	19	0.45035	1	6480	316	31	2	0.0487654	0.0645161	0.0115853	1	10
zmp_ph175	sa8962	pcna	ENSDARG00000054155	20	0.133071	1	6480	266	31	3	0.0410494	0.0967742	0.0269001	1	10
zmp_ph175	sa8962	pcna	ENSDARG00000054155	21	0.713363	1	6480	256	31	1	0.0395062	0.0322581	0.00165325	1	10
zmp_ph175	sa8962	pcna	ENSDARG00000054155	22	1	1	6480	203	31	0	0.0313272	0	0	1	10
zmp_ph175	sa8962	pcna	ENSDARG00000054155	23	0.377618	1	6480	273	31	2	0.0421296	0.0645161	0.0115853	1	10
zmp_ph175	sa8962	pcna	ENSDARG00000054155	24	0.569921	1	6480	174	31	1	0.0268519	0.0322581	0.00165325	1	10
zmp_ph175	sa8962	pcna	ENSDARG00000054155	25	0.569921	1	6480	174	31	1	0.0268519	0.0322581	0.00165325	1	10
zmp_ph180	sa24936	pax2a	ENSDARG00000028148	1	1	1	11129	483	8	0	0.0434001	0	0	1	13
zmp_ph180	sa24936	pax2a	ENSDARG00000028148	2	0.0508337	1	11129	521	8	2	0.0468146	0.25	0.0463893	1	13
zmp_ph180	sa24936	pax2a	ENSDARG00000028148	3	1	1	11129	599	8	0	0.0538233	0	0	1	13
zmp_ph180	sa24936	pax2a	ENSDARG00000028148	4	1	1	11129	492	8	0	0.0442088	0	0	1	13
zmp_ph180	sa24936	pax2a	ENSDARG00000028148	5	1	1	11129	653	8	0	0.0586755	0	0	1	13
zmp_ph180	sa24936	pax2a	ENSDARG00000028148	6	1	1	11129	483	8	0	0.0434001	0	0	1	13
zmp_ph180	sa24936	pax2a	ENSDARG00000028148	7	0.350777	1	11129	585	8	1	0.0525654	0.125	0.00639115	1	13
zmp_ph180	sa24936	pax2a	ENSDARG00000028148	8	1	1	11129	466	8	0	0.0418726	0	0	1	13
zmp_ph180	sa24936	pax2a	ENSDARG00000028148	9	1	1	11129	380	8	0	0.034145	0	0	1	13
zmp_ph180	sa24936	pax2a	ENSDARG00000028148	10	1	1	11129	390	8	0	0.0350436	0	0	1	13
zmp_ph180	sa24936	pax2a	ENSDARG00000028148	11	1	1	11129	397	8	0	0.0356726	0	0	1	13
zmp_ph180	sa24936	pax2a	ENSDARG00000028148	12	1	1	11129	380	8	0	0.034145	0	0	1	13
zmp_ph180	sa24936	pax2a	ENSDARG00000028148	13	5.64265e-06	0.000141066	11129	453	8	5	0.0407045	0.625	0.289241	1	13
zmp_ph180	sa24936	pax2a	ENSDARG00000028148	14	1	1	11129	411	8	0	0.0369305	0	0	1	13
zmp_ph180	sa24936	pax2a	ENSDARG00000028148	15	1	1	11129	375	8	0	0.0336957	0	0	1	13
zmp_ph180	sa24936	pax2a	ENSDARG00000028148	16	1	1	11129	502	8	0	0.0451074	0	0	1	13
zmp_ph180	sa24936	pax2a	ENSDARG00000028148	17	1	1	11129	412	8	0	0.0370204	0	0	1	13
zmp_ph180	sa24936	pax2a	ENSDARG00000028148	18	1	1	11129	362	8	0	0.0325276	0	0	1	13
zmp_ph180	sa24936	pax2a	ENSDARG00000028148	19	1	1	11129	472	8	0	0.0424117	0	0	1	13
zmp_ph180	sa24936	pax2a	ENSDARG00000028148	20	1	1	11129	461	8	0	0.0414233	0	0	1	13
zmp_ph180	sa24936	pax2a	ENSDARG00000028148	21	1	1	11129	404	8	0	0.0363016	0	0	1	13
zmp_ph180	sa24936	pax2a	ENSDARG00000028148	22	1	1	11129	386	8	0	0.0346842	0	0	1	13
zmp_ph180	sa24936	pax2a	ENSDARG00000028148	23	1	1	11129	426	8	0	0.0382784	0	0	1	13
zmp_ph180	sa24936	pax2a	ENSDARG00000028148	24	1	1	11129	294	8	0	0.0264175	0	0	1	13
zmp_ph180	sa24936	pax2a	ENSDARG00000028148	25	1	1	11129	342	8	0	0.0307305	0	0	1	13
zmp_ph181	sa24936	pax2a	ENSDARG00000028148	1	0.0395508	0.98877	13569	610	29	4	0.0449554	0.137931	0.0485201	1	13
zmp_ph181	sa24936	pax2a	ENSDARG00000028148	2	0.00975289	0.243822	13569	625	29	5	0.0460609	0.172414	0.0704939	1	13
zmp_ph181	sa24936	pax2a	ENSDARG00000028148	3	1	1	13569	716	29	0	0.0527673	0	0	1	13
zmp_ph181	sa24936	pax2a	ENSDARG00000028148	4	1	1	13569	595	29	0	0.04385	0	0	1	13
zmp_ph181	sa24936	pax2a	ENSDARG00000028148	5	1	1	13569	805	29	0	0.0593264	0	0	1	13
zmp_ph181	sa24936	pax2a	ENSDARG00000028148	6	1	1	13569	598	29	0	0.044071	0	0	1	13
zmp_ph181	sa24936	pax2a	ENSDARG00000028148	7	0.777871	1	13569	686	29	1	0.0505564	0.0344828	0.00176717	1	13
zmp_ph181	sa24936	pax2a	ENSDARG00000028148	8	0.715124	1	13569	575	29	1	0.042376	0.0344828	0.00176717	1	13
zmp_ph181	sa24936	pax2a	ENSDARG00000028148	9	0.648116	1	13569	480	29	1	0.0353748	0.0344828	0.00176717	1	13
zmp_ph181	sa24936	pax2a	ENSDARG00000028148	10	0.633809	1	13569	462	29	1	0.0340482	0.0344828	0.00176717	1	13
zmp_ph181	sa24936	pax2a	ENSDARG00000028148	11	1	1	13569	450	29	0	0.0331638	0	0	1	13
zmp_ph181	sa24936	pax2a	ENSDARG00000028148	12	0.0195038	0.487596	13569	489	29	4	0.036038	0.137931	0.0485201	1	13
zmp_ph181	sa24936	pax2a	ENSDARG00000028148	13	0.025808	0.6452	13569	533	29	4	0.0392807	0.137931	0.0485201	1	13
zmp_ph181	sa24936	pax2a	ENSDARG00000028148	14	0.666354	1	13569	504	29	1	0.0371435	0.0344828	0.00176717	1	13
zmp_ph181	sa24936	pax2a	ENSDARG00000028148	15	1	1	13569	475	29	0	0.0350063	0	0	1	13
zmp_ph181	sa24936	pax2a	ENSDARG00000028148	16	1	1	13569	608	29	0	0.044808	0	0	1	13
zmp_ph181	sa24936	pax2a	ENSDARG00000028148	17	0.66487	1	13569	502	29	1	0.0369961	0.0344828	0.00176717	1	13
zmp_ph181	sa24936	pax2a	ENSDARG00000028148	18	0.062007	1	13569	427	29	3	0.0314688	0.103448	0.0287955	1	13
zmp_ph181	sa24936	pax2a	ENSDARG00000028148	19	1	1	13569	562	29	0	0.0414179	0	0	1	13
zmp_ph181	sa24936	pax2a	ENSDARG00000028148	20	1	1	13569	569	29	0	0.0419338	0	0	1	13
zmp_ph181	sa24936	pax2a	ENSDARG00000028148	21	0.2931	1	13569	504	29	2	0.0371435	0.0689655	0.0123935	1	13
zmp_ph181	sa24936	pax2a	ENSDARG00000028148	22	1	1	13569	456	29	0	0.033606	0	0	1	13
zmp_ph181	sa24936	pax2a	ENSDARG00000028148	23	0.695421	1	13569	545	29	1	0.0401651	0.0344828	0.00176717	1	13
zmp_ph181	sa24936	pax2a	ENSDARG00000028148	24	1	1	13569	375	29	0	0.0276365	0	0	1	13
zmp_ph181	sa24936	pax2a	ENSDARG00000028148	25	1	1	13569	418	29	0	0.0308055	0	0	1	13
zmp_ph184	fh158	ercc3	ENSDARG00000002402	1	0.980557	1	10030	466	316	8	0.0464606	0.0253165	0.0126583	1	6
zmp_ph184	fh158	ercc3	ENSDARG00000002402	2	0.83961	1	10030	485	316	12	0.0483549	0.0379747	0.0220555	1	6
zmp_ph184	fh158	ercc3	ENSDARG00000002402	3	0.975273	1	10030	536	316	10	0.0534397	0.0316456	0.0172673	1	6
zmp_ph184	fh158	ercc3	ENSDARG00000002402	4	0.662101	1	10030	315	316	9	0.0314058	0.028481	0.0149369	1	6
zmp_ph184	fh158	ercc3	ENSDARG00000002402	5	0.770481	1	10030	558	316	15	0.0556331	0.0474684	0.0294846	1	6
zmp_ph184	fh158	ercc3	ENSDARG00000002402	6	0.000803984	0.0200996	10030	461	316	28	0.0459621	0.0886076	0.063707	1	6
zmp_ph184	fh158	ercc3	ENSDARG00000002402	7	0.558614	1	10030	515	316	16	0.051346	0.0506329	0.0320136	1	6
zmp_ph184	fh158	ercc3	ENSDARG00000002402	8	0.85834	1	10030	422	316	10	0.0420738	0.0316456	0.0172673	1	6
zmp_ph184	fh158	ercc3	ENSDARG00000002402	9	6.0956e-06	0.00015239	10030	364	316	29	0.0362911	0.0917722	0.0664306	1	6
zmp_ph184	fh158	ercc3	ENSDARG00000002402	10	0.731103	1	10030	370	316	10	0.0368893	0.0316456	0.0172673	1	6
zmp_ph184	fh158	ercc3	ENSDARG00000002402	11	0.0740181	1	10030	366	316	17	0.0364905	0.0537975	0.0345649	1	6
zmp_ph184	fh158	ercc3	ENSDARG00000002402	12	0.943971	1	10030	366	316	7	0.0364905	0.0221519	0.0104416	1	6
zmp_ph184	fh158	ercc3	ENSDARG00000002402	13	0.892025	1	10030	404	316	9	0.0402792	0.028481	0.0149369	1	6
zmp_ph184	fh158	ercc3	ENSDARG00000002402	14	0.573671	1	10030	390	316	12	0.0388833	0.0379747	0.0220555	1	6
zmp_ph184	fh158	ercc3	ENSDARG00000002402	15	0.720735	1	10030	332	316	9	0.0331007	0.028481	0.0149369	1	6
zmp_ph184	fh158	ercc3	ENSDARG00000002402	16	0.747401	1	10030	445	316	12	0.0443669	0.0379747	0.0220555	1	6
zmp_ph184	fh158	ercc3	ENSDARG00000002402	17	0.481233	1	10030	365	316	12	0.0363908	0.0379747	0.0220555	1	6
zmp_ph184	fh158	ercc3	ENSDARG00000002402	18	0.949257	1	10030	330	316	6	0.0329013	0.0189873	0.0083005	1	6
zmp_ph184	fh158	ercc3	ENSDARG00000002402	19	0.156065	1	10030	439	316	18	0.0437687	0.056962	0.0371367	1	6
zmp_ph184	fh158	ercc3	ENSDARG00000002402	20	0.947135	1	10030	410	316	8	0.0408774	0.0253165	0.0126583	1	6
zmp_ph184	fh158	ercc3	ENSDARG00000002402	21	0.22765	1	10030	382	316	15	0.0380857	0.0474684	0.0294846	1	6
zmp_ph184	fh158	ercc3	ENSDARG00000002402	22	0.210187	1	10030	319	316	13	0.0318046	0.0411392	0.0245027	1	6
zmp_ph184	fh158	ercc3	ENSDARG00000002402	23	0.282123	1	10030	400	316	15	0.0398804	0.0474684	0.0294846	1	6
zmp_ph184	fh158	ercc3	ENSDARG00000002402	24	0.456046	1	10030	296	316	10	0.0295115	0.0316456	0.0172673	1	6
zmp_ph184	fh158	ercc3	ENSDARG00000002402	25	0.90274	1	10030	294	316	6	0.0293121	0.0189873	0.0083005	1	6
zmp_ph185	sa10712	cax1	ENSDARG00000045601	1	0.294942	1	4796	205	8	1	0.042744	0.125	0.00639115	1	4
zmp_ph185	sa10712	cax1	ENSDARG00000045601	2	1	1	4796	237	8	0	0.0494162	0	0	1	4
zmp_ph185	sa10712	cax1	ENSDARG00000045601	3	1	1	4796	285	8	0	0.0594245	0	0	1	4
zmp_ph185	sa10712	cax1	ENSDARG00000045601	4	0.0269386	0.673464	4796	159	8	2	0.0331526	0.25	0.0463893	1	4
zmp_ph185	sa10712	cax1	ENSDARG00000045601	5	0.343767	1	4796	246	8	1	0.0512927	0.125	0.00639115	1	4
zmp_ph185	sa10712	cax1	ENSDARG00000045601	6	1	1	4796	237	8	0	0.0494162	0	0	1	4
zmp_ph185	sa10712	cax1	ENSDARG00000045601	7	1	1	4796	246	8	0	0.0512927	0	0	1	4
zmp_ph185	sa10712	cax1	ENSDARG00000045601	8	1	1	4796	189	8	0	0.0394078	0	0	1	4
zmp_ph185	sa10712	cax1	ENSDARG00000045601	9	1	1	4796	173	8	0	0.0360717	0	0	1	4
zmp_ph185	sa10712	cax1	ENSDARG00000045601	10	1	1	4796	168	8	0	0.0350292	0	0	1	4
zmp_ph185	sa10712	cax1	ENSDARG00000045601	11	1	1	4796	167	8	0	0.0348207	0	0	1	4
zmp_ph185	sa10712	cax1	ENSDARG00000045601	12	1	1	4796	152	8	0	0.0316931	0	0	1	4
zmp_ph185	sa10712	cax1	ENSDARG00000045601	13	1	1	4796	176	8	0	0.0366972	0	0	1	4
zmp_ph185	sa10712	cax1	ENSDARG00000045601	14	0.275043	1	4796	189	8	1	0.0394078	0.125	0.00639115	1	4
zmp_ph185	sa10712	cax1	ENSDARG00000045601	15	1	1	4796	147	8	0	0.0306505	0	0	1	4
zmp_ph185	sa10712	cax1	ENSDARG00000045601	16	0.286296	1	4796	198	8	1	0.0412844	0.125	0.00639115	1	4
zmp_ph185	sa10712	cax1	ENSDARG00000045601	17	0.232443	1	4796	156	8	1	0.0325271	0.125	0.00639115	1	4
zmp_ph185	sa10712	cax1	ENSDARG00000045601	18	1	1	4796	170	8	0	0.0354462	0	0	1	4
zmp_ph185	sa10712	cax1	ENSDARG00000045601	19	1	1	4796	240	8	0	0.0500417	0	0	1	4
zmp_ph185	sa10712	cax1	ENSDARG00000045601	20	1	1	4796	200	8	0	0.0417014	0	0	1	4
zmp_ph185	sa10712	cax1	ENSDARG00000045601	21	1	1	4796	216	8	0	0.0450375	0	0	1	4
zmp_ph185	sa10712	cax1	ENSDARG00000045601	22	1	1	4796	153	8	0	0.0319016	0	0	1	4
zmp_ph185	sa10712	cax1	ENSDARG00000045601	23	1	1	4796	196	8	0	0.0408674	0	0	1	4
zmp_ph185	sa10712	cax1	ENSDARG00000045601	24	0.227134	1	4796	152	8	1	0.0316931	0.125	0.00639115	1	4
zmp_ph185	sa10712	cax1	ENSDARG00000045601	25	1	1	4796	139	8	0	0.0289825	0	0	1	4
zmp_ph188	ta222a	dmd	ENSDARG00000008487	1	1.04725e-06	2.61814e-05	13359	601	40	11	0.0449884	0.275	0.162521	1	1
zmp_ph188	ta222a	dmd	ENSDARG00000008487	2	0.853814	1	13359	627	40	1	0.0469347	0.025	0.00128151	1	1
zmp_ph188	ta222a	dmd	ENSDARG00000008487	3	0.0558043	1	13359	697	40	5	0.0521746	0.125	0.0505703	1	1
zmp_ph188	ta222a	dmd	ENSDARG00000008487	4	1	1	13359	435	40	0	0.0325623	0	0	1	1
zmp_ph188	ta222a	dmd	ENSDARG00000008487	5	1	1	13359	758	40	0	0.0567408	0	0	1	1
zmp_ph188	ta222a	dmd	ENSDARG00000008487	6	1	1	13359	610	40	0	0.0456621	0	0	1	1
zmp_ph188	ta222a	dmd	ENSDARG00000008487	7	1	1	13359	702	40	0	0.0525488	0	0	1	1
zmp_ph188	ta222a	dmd	ENSDARG00000008487	8	0.820787	1	13359	562	40	1	0.042069	0.025	0.00128151	1	1
zmp_ph188	ta222a	dmd	ENSDARG00000008487	9	0.194051	1	13359	508	40	3	0.0380268	0.075	0.0207536	1	1
zmp_ph188	ta222a	dmd	ENSDARG00000008487	10	0.412132	1	13359	469	40	2	0.0351074	0.05	0.00895695	1	1
zmp_ph188	ta222a	dmd	ENSDARG00000008487	11	0.413186	1	13359	470	40	2	0.0351823	0.05	0.00895695	1	1
zmp_ph188	ta222a	dmd	ENSDARG00000008487	12	0.17968	1	13359	489	40	3	0.0366045	0.075	0.0207536	1	1
zmp_ph188	ta222a	dmd	ENSDARG00000008487	13	0.0691697	1	13359	520	40	4	0.0389251	0.1	0.0348849	1	1
zmp_ph188	ta222a	dmd	ENSDARG00000008487	14	0.440271	1	13359	496	40	2	0.0371285	0.05	0.00895695	1	1
zmp_ph188	ta222a	dmd	ENSDARG00000008487	15	1	1	13359	461	40	0	0.0345086	0	0	1	1
zmp_ph188	ta222a	dmd	ENSDARG00000008487	16	0.550678	1	13359	610	40	2	0.0456621	0.05	0.00895695	1	1
zmp_ph188	ta222a	dmd	ENSDARG00000008487	17	0.785254	1	13359	504	40	1	0.0377274	0.025	0.00128151	1	1
zmp_ph188	ta222a	dmd	ENSDARG00000008487	18	1	1	13359	427	40	0	0.0319635	0	0	1	1
zmp_ph188	ta222a	dmd	ENSDARG00000008487	19	1	1	13359	572	40	0	0.0428176	0	0	1	1
zmp_ph188	ta222a	dmd	ENSDARG00000008487	20	1	1	13359	558	40	0	0.0417696	0	0	1	1
zmp_ph188	ta222a	dmd	ENSDARG00000008487	21	1	1	13359	508	40	0	0.0380268	0	0	1	1
zmp_ph188	ta222a	dmd	ENSDARG00000008487	22	0.37906	1	13359	438	40	2	0.0327869	0.05	0.00895695	1	1
zmp_ph188	ta222a	dmd	ENSDARG00000008487	23	0.81219	1	13359	547	40	1	0.0409462	0.025	0.00128151	1	1
[truncated: 852 more rows]
