# Supplementary material for: Allele-specific gene expression can underlie altered transcript abundance in zebrafish mutants
Source: eLife. 2022 Feb 17;11:e72825. doi: 10.7554/eLife.72825 (PMC8884726; doi:10.7554/eLife.72825)
Supplement: Supplementary file 3. [file elife-72825-supp3.xlsx]

## Sheet: chr9-enrichment-sig_genes
Differentially expressed genes on chromosome 9 from 7 experiments that show an enrichment of differentially expressed genes on chromosome 9.
Expt	Chr	Region start	Region end	3' end position	3' end strand	Gene ID	Gene name	Gene description
zmp_ph114	9	13117801	13118525	13118516,13118525	1	ENSDARG00000020057	bmpr2b	bone morphogenetic protein receptor, type II b (serine/threonine kinase) [Source:ZFIN;Acc:ZDB-GENE-070618-2]	Description of column names
zmp_ph114	9	1372501	1373278	1373278	1	ENSDARG00000076718	prkra	protein kinase, interferon-inducible double stranded RNA dependent activator [Source:ZFIN;Acc:ZDB-GENE-050309-206]	Expt	Unique id for each experiment
zmp_ph114	9	22017701	22018301	22018301	1	ENSDARG00000040738	zgc:153846	zgc:153846 [Source:ZFIN;Acc:ZDB-GENE-060929-898]	Chr	Chromosome of the differentially expressed region
zmp_ph114	9	22098690	22099400	22098690	-1	ENSDARG00000069827	CR391987.1	-	Region start	Start of the differentially expressed region
zmp_ph114	9	22121722	22122400	22121762,22121722	-1	ENSDARG00000073750	crygm2d9	crystallin, gamma M2d9 [Source:ZFIN;Acc:ZDB-GENE-081105-81]	Region end	End of the differentially expressed region
zmp_ph114	9	22128508	22128900	22128508	-1	ENSDARG00000069817	crygm2d8	crystallin, gamma M2d8 [Source:ZFIN;Acc:ZDB-GENE-040718-321]	3' end position	Position of the DeTCT 3' end
zmp_ph114	9	22157473	22158200	22157473	-1	ENSDARG00000076790	crygm2d16	crystallin, gamma M2d16 [Source:ZFIN;Acc:ZDB-GENE-071004-53]	3' end strand	Strand of the differentially expressed region (1 = plus strand, -1 = minus strand)
zmp_ph114	9	22187195	22187800	22187195	-1	ENSDARG00000109861	crygm2d17	crystallin, gamma M2d17 [Source:ZFIN;Acc:ZDB-GENE-070720-9]	Gene ID	Ensembl Gene id associated with the differntially expressed region
zmp_ph114	9	22212352	22212700	22212352	-1	ENSDARG00000091148	crygm2d20	crystallin, gamma M2d20 [Source:ZFIN;Acc:ZDB-GENE-070424-32]	Gene name	Gene name associated with the differntially expressed region
zmp_ph114	9	22231976	22232600	22231976	-1	ENSDARG00000069792	crygm2d5	crystallin, gamma M2d5 [Source:ZFIN;Acc:ZDB-GENE-060918-4]	Gene description	Gene name description
zmp_ph114	9	22239121	22239800	22239121	-1	ENSDARG00000115701	crygm2d9	crystallin, gamma M2d9 [Source:ZFIN;Acc:ZDB-GENE-081105-81]
zmp_ph114	9	22244640	22245300	22244640	-1	ENSDARG00000087164	crygm2d4	crystallin, gamma M2d4 [Source:ZFIN;Acc:ZDB-GENE-060918-3]
zmp_ph114	9	22280690	22281400	22280690	-1	ENSDARG00000088823	crygm2d3	crystallin, gamma M2d3 [Source:ZFIN;Acc:ZDB-GENE-060918-2]
zmp_ph114	9	22298409	22299100	22298483	-1	ENSDARG00000086658	crygm2d21	crystallin, gamma M2d21 [Source:ZFIN;Acc:ZDB-GENE-081105-133]
zmp_ph114	9	22309923	22310700	22309981	-1	ENSDARG00000087765	crygm2d10	crystallin, gamma M2d10 [Source:ZFIN;Acc:ZDB-GENE-071004-96]
zmp_ph114	9	22317603	22318300	22317603	-1	ENSDARG00000086917	crygm2d2	crystallin, gamma M2d2 [Source:ZFIN;Acc:ZDB-GENE-060918-1]
zmp_ph114	9	22338656	22339300	22338656	-1	ENSDARG00000087324	crygm2d1	crystallin, gamma M2d1 [Source:ZFIN;Acc:ZDB-GENE-050522-395]
zmp_ph114	9	24214660	24215200	24214660	-1	ENSDARG00000004692	nabp1a	nucleic acid binding protein 1a [Source:ZFIN;Acc:ZDB-GENE-041212-71]
zmp_ph114	9	42652336	42653700	42653045,42653190,42652703,42652336,42653360,42652341,42653346	-1	ENSDARG00000031678	col5a2a	collagen, type V, alpha 2a [Source:ZFIN;Acc:ZDB-GENE-030616-13]
zmp_ph114	9	45843001	45843475	45843475	1	ENSDARG00000078266	twist2	twist2 [Source:ZFIN;Acc:ZDB-GENE-980526-235]
zmp_ph114	9	46369125	46369800	46369534	-1	ENSDARG00000060671	lct	lactase [Source:ZFIN;Acc:ZDB-GENE-081104-434]
zmp_ph114	9	5344218	5344700	5344268	-1	ENSDARG00000059209	abhd13	abhydrolase domain containing 13 [Source:ZFIN;Acc:ZDB-GENE-051120-54]
zmp_ph114	9	56228401	56228600	56226200	-1	ENSDARG00000053365	rpl31	ribosomal protein L31 [Source:ZFIN;Acc:ZDB-GENE-060331-121]
zmp_ph114	9	5891401	5892075	5892075	1	ENSDARG00000022261	pdzk1	PDZ domain containing 1 [Source:ZFIN;Acc:ZDB-GENE-031222-1]
zmp_ph114	9	6372154	6372500	6372154	-1	ENSDARG00000056087	ecrg4a	esophageal cancer related gene 4a [Source:ZFIN;Acc:ZDB-GENE-050417-189]
zmp_ph114	9	6601301	6601984	6601627,6601984	1	ENSDARG00000042018	fhl2a	four and a half LIM domains 2a [Source:ZFIN;Acc:ZDB-GENE-040808-49]
zmp_ph184	9	11554362	11554600	11554362,11554405	-1	ENSDARG00000041925	cryba2b	crystallin, beta A2b [Source:ZFIN;Acc:ZDB-GENE-040718-324]
zmp_ph184	9	11555301	11555500	11554362,11554406	-1	ENSDARG00000041925	cryba2b	crystallin, beta A2b [Source:ZFIN;Acc:ZDB-GENE-040718-324]
zmp_ph184	9	22004401	22004834	22004834	1	ENSDARG00000093318	si:dkey-57a22.15	si:dkey-57a22.15 [Source:ZFIN;Acc:ZDB-GENE-081104-427]
zmp_ph184	9	22091163	22091500	22091163	-1	ENSDARG00000057460	crygm2d13	crystallin, gamma M2d13 [Source:ZFIN;Acc:ZDB-GENE-040718-105]
zmp_ph184	9	22091601	22092000	22091163	-1	ENSDARG00000057460	crygm2d13	crystallin, gamma M2d13 [Source:ZFIN;Acc:ZDB-GENE-040718-105]
zmp_ph184	9	22098691	22099400	22098691	-1	ENSDARG00000069827	CR391987.1	-
zmp_ph184	9	22116606	22117300	22116606	-1	ENSDARG00000069826	crygm2d15	crystallin, gamma M2d15 [Source:ZFIN;Acc:ZDB-GENE-040718-322]
zmp_ph184	9	22121762	22122400	22121762	-1	ENSDARG00000073750	crygm2d9	crystallin, gamma M2d9 [Source:ZFIN;Acc:ZDB-GENE-081105-81]
zmp_ph184	9	22127201	22127500	22127117	-1	ENSDARG00000069817	crygm2d8	crystallin, gamma M2d8 [Source:ZFIN;Acc:ZDB-GENE-040718-321]
zmp_ph184	9	22128508	22128900	22128508	-1	ENSDARG00000069817	crygm2d8	crystallin, gamma M2d8 [Source:ZFIN;Acc:ZDB-GENE-040718-321]
zmp_ph184	9	22129301	22129600	22128508	-1	ENSDARG00000069817	crygm2d8	crystallin, gamma M2d8 [Source:ZFIN;Acc:ZDB-GENE-040718-321]
zmp_ph184	9	22134739	22135500	22134739	-1	ENSDARG00000116164	crygm2d8	crystallin, gamma M2d8 [Source:ZFIN;Acc:ZDB-GENE-040718-321]
zmp_ph184	9	22146469	22146900	22146542,22146469	-1	ENSDARG00000087301	crygm2d14	crystallin, gamma M2d14 [Source:ZFIN;Acc:ZDB-GENE-070822-20]
zmp_ph184	9	22147001	22147300	22146542	-1	ENSDARG00000087301	crygm2d14	crystallin, gamma M2d14 [Source:ZFIN;Acc:ZDB-GENE-070822-20]
zmp_ph184	9	22157473	22158100	22157473	-1	ENSDARG00000076790	crygm2d16	crystallin, gamma M2d16 [Source:ZFIN;Acc:ZDB-GENE-071004-53]
zmp_ph184	9	22181423	22181800	22181475,22181423	-1	ENSDARG00000073874	crygm2d6	crystallin, gamma M2d6 [Source:ZFIN;Acc:ZDB-GENE-040625-145]
zmp_ph184	9	22187195	22187800	22187195	-1	ENSDARG00000109861	crygm2d17	crystallin, gamma M2d17 [Source:ZFIN;Acc:ZDB-GENE-070720-9]
zmp_ph184	9	22204778	22205400	22204778	-1	ENSDARG00000069801	crygm2d12	crystallin, gamma M2d12 [Source:ZFIN;Acc:ZDB-GENE-070822-19]
zmp_ph184	9	22212352	22212700	22212352	-1	ENSDARG00000091148	crygm2d20	crystallin, gamma M2d20 [Source:ZFIN;Acc:ZDB-GENE-070424-32]
zmp_ph184	9	22212801	22213100	22212352	-1	ENSDARG00000091148	crygm2d20	crystallin, gamma M2d20 [Source:ZFIN;Acc:ZDB-GENE-070424-32]
zmp_ph184	9	22231976	22232700	22231976	-1	ENSDARG00000069792	crygm2d5	crystallin, gamma M2d5 [Source:ZFIN;Acc:ZDB-GENE-060918-4]
zmp_ph184	9	22239036	22239800	22239122,22239036	-1	ENSDARG00000115701	crygm2d9	crystallin, gamma M2d9 [Source:ZFIN;Acc:ZDB-GENE-081105-81]
zmp_ph184	9	22244640	22245300	22244640	-1	ENSDARG00000087164	crygm2d4	crystallin, gamma M2d4 [Source:ZFIN;Acc:ZDB-GENE-060918-3]
zmp_ph184	9	22280690	22281400	22280690	-1	ENSDARG00000088823	crygm2d3	crystallin, gamma M2d3 [Source:ZFIN;Acc:ZDB-GENE-060918-2]
zmp_ph184	9	22298409	22299200	22298480	-1	ENSDARG00000086658	crygm2d21	crystallin, gamma M2d21 [Source:ZFIN;Acc:ZDB-GENE-081105-133]
zmp_ph184	9	22309923	22310700	22309981,22309986	-1	ENSDARG00000087765	crygm2d10	crystallin, gamma M2d10 [Source:ZFIN;Acc:ZDB-GENE-071004-96]
zmp_ph184	9	22317603	22318300	22317603	-1	ENSDARG00000086917	crygm2d2	crystallin, gamma M2d2 [Source:ZFIN;Acc:ZDB-GENE-060918-1]
zmp_ph184	9	22338656	22339300	22338656	-1	ENSDARG00000087324	crygm2d1	crystallin, gamma M2d1 [Source:ZFIN;Acc:ZDB-GENE-050522-395]
zmp_ph184	9	22351001	22351300	22350939	-1	ENSDARG00000041179	crygm5	crystallin, gamma M5 [Source:ZFIN;Acc:ZDB-GENE-041024-6]
zmp_ph184	9	265991	266500	265991	-1	ENSDARG00000098936	kif5aa	kinesin family member 5A, a [Source:ZFIN;Acc:ZDB-GENE-070912-141]
zmp_ph184	9	32556301	32556600	32556275	-1	ENSDARG00000061885	satb2	SATB homeobox 2 [Source:ZFIN;Acc:ZDB-GENE-070912-212]
zmp_ph184	9	3666428	3666900	3666398	-1	ENSDARG00000076571	sp5a	Sp5 transcription factor a [Source:ZFIN;Acc:ZDB-GENE-030430-2]
zmp_ph184	9	44291723	44292400	44291723	-1	ENSDARG00000019566	neurod1	neuronal differentiation 1 [Source:ZFIN;Acc:ZDB-GENE-990415-172]
zmp_ph184	9	55353901	55354100	55354117	1	ENSDARG00000077761	nlgn4b	neuroligin 4b [Source:ZFIN;Acc:ZDB-GENE-100309-1]
zmp_ph184	9	7515861	7516200	7515866,7515861	-1	ENSDARG00000058656	desma	desmin a [Source:ZFIN;Acc:ZDB-GENE-980526-221]
zmp_ph204	9	11554362	11554600	11554362,11554413	-1	ENSDARG00000041925	cryba2b	crystallin, beta A2b [Source:ZFIN;Acc:ZDB-GENE-040718-324]
zmp_ph204	9	22091163	22091500	22091163	-1	ENSDARG00000057460	crygm2d13	crystallin, gamma M2d13 [Source:ZFIN;Acc:ZDB-GENE-040718-105]
zmp_ph204	9	22098691	22099300	22098691	-1	ENSDARG00000069827	CR391987.1	-
zmp_ph204	9	22116606	22117300	22116606	-1	ENSDARG00000069826	crygm2d15	crystallin, gamma M2d15 [Source:ZFIN;Acc:ZDB-GENE-040718-322]
zmp_ph204	9	22121722	22122400	22121762,22121722	-1	ENSDARG00000073750	crygm2d9	crystallin, gamma M2d9 [Source:ZFIN;Acc:ZDB-GENE-081105-81]
zmp_ph204	9	22128508	22128900	22128508	-1	ENSDARG00000069817	crygm2d8	crystallin, gamma M2d8 [Source:ZFIN;Acc:ZDB-GENE-040718-321]
zmp_ph204	9	22134739	22135500	22134739	-1	ENSDARG00000116164	crygm2d8	crystallin, gamma M2d8 [Source:ZFIN;Acc:ZDB-GENE-040718-321]
zmp_ph204	9	22187195	22187800	22187195	-1	ENSDARG00000109861	crygm2d17	crystallin, gamma M2d17 [Source:ZFIN;Acc:ZDB-GENE-070720-9]
zmp_ph204	9	22204778	22205400	22204778	-1	ENSDARG00000069801	crygm2d12	crystallin, gamma M2d12 [Source:ZFIN;Acc:ZDB-GENE-070822-19]
zmp_ph204	9	22212352	22212700	22212352	-1	ENSDARG00000091148	crygm2d20	crystallin, gamma M2d20 [Source:ZFIN;Acc:ZDB-GENE-070424-32]
zmp_ph204	9	22231976	22232700	22231976	-1	ENSDARG00000069792	crygm2d5	crystallin, gamma M2d5 [Source:ZFIN;Acc:ZDB-GENE-060918-4]
zmp_ph204	9	22239038	22239800	22239122,22239038	-1	ENSDARG00000115701	crygm2d9	crystallin, gamma M2d9 [Source:ZFIN;Acc:ZDB-GENE-081105-81]
zmp_ph204	9	22317603	22318300	22317603	-1	ENSDARG00000086917	crygm2d2	crystallin, gamma M2d2 [Source:ZFIN;Acc:ZDB-GENE-060918-1]
zmp_ph204	9	23842949	23843100	23842949	-1	ENSDARG00000057108	serpine3	serpin peptidase inhibitor, clade E (nexin, plasminogen activator inhibitor type 1), member 3 [Source:ZFIN;Acc:ZDB-GENE-050309-223]
zmp_ph204	9	44291723	44292500	44291723,44292019	-1	ENSDARG00000019566	neurod1	neuronal differentiation 1 [Source:ZFIN;Acc:ZDB-GENE-990415-172]
zmp_ph205	9	11554362	11554600	11554362,11554405	-1	ENSDARG00000041925	cryba2b	crystallin, beta A2b [Source:ZFIN;Acc:ZDB-GENE-040718-324]
zmp_ph205	9	11555301	11555500	11554362	-1	ENSDARG00000041925	cryba2b	crystallin, beta A2b [Source:ZFIN;Acc:ZDB-GENE-040718-324]
zmp_ph205	9	11557701	11557800	11554362	-1	ENSDARG00000041925	cryba2b	crystallin, beta A2b [Source:ZFIN;Acc:ZDB-GENE-040718-324]
zmp_ph205	9	12648706	12649000	12648706	-1	ENSDARG00000035993	sumo3b	small ubiquitin-like modifier 3b [Source:ZFIN;Acc:ZDB-GENE-040718-426]
zmp_ph205	9	14112599	14113000	14112480	-1	ENSDARG00000078935	ttll4	tubulin tyrosine ligase-like family, member 4 [Source:ZFIN;Acc:ZDB-GENE-070912-313]
zmp_ph205	9	15643801	15644000	15643783	-1	ENSDARG00000093038	CR513782.2	-
zmp_ph205	9	15650501	15650700	15650487	-1	ENSDARG00000093038	CR513782.2	-
zmp_ph205	9	18908971	18909300	18908979,18908971	-1	ENSDARG00000092033	si:dkey-239h2.3	si:dkey-239h2.3 [Source:ZFIN;Acc:ZDB-GENE-081104-383]
zmp_ph205	9	21411101	21411400	21411406	1	ENSDARG00000021889	gja3	gap junction protein, alpha 3 [Source:ZFIN;Acc:ZDB-GENE-031217-3]
zmp_ph205	9	21831301	21831585	21831577,21831585	1	ENSDARG00000069846	zgc:162944	zgc:162944 [Source:ZFIN;Acc:ZDB-GENE-070424-75]
zmp_ph205	9	21929933	21930100	21929933	-1	ENSDARG00000004930	lmo7a	LIM domain 7a [Source:ZFIN;Acc:ZDB-GENE-030219-74]
zmp_ph205	9	22004501	22004834	22004834	1	ENSDARG00000093318	si:dkey-57a22.15	si:dkey-57a22.15 [Source:ZFIN;Acc:ZDB-GENE-081104-427]
zmp_ph205	9	22018101	22018200	22018301	1	ENSDARG00000040738	zgc:153846	zgc:153846 [Source:ZFIN;Acc:ZDB-GENE-060929-898]
zmp_ph205	9	22022201	22022300	22022109	-1	ENSDARG00000117097	crygm2c	crystallin, gamma M2c [Source:ZFIN;Acc:ZDB-GENE-050516-11]
zmp_ph205	9	22068419	22068700	22068419	-1	ENSDARG00000115234	crygm2b	crystallin, gamma M2b [Source:ZFIN;Acc:ZDB-GENE-050516-10]
zmp_ph205	9	22080701	22080900	22080914	1	ENSDARG00000044875	crygm2e	crystallin, gamma M2e [Source:ZFIN;Acc:ZDB-GENE-081105-116]
zmp_ph205	9	22091163	22091500	22091163	-1	ENSDARG00000057460	crygm2d13	crystallin, gamma M2d13 [Source:ZFIN;Acc:ZDB-GENE-040718-105]
zmp_ph205	9	22091601	22091900	22091163,22091158	-1	ENSDARG00000057460	crygm2d13	crystallin, gamma M2d13 [Source:ZFIN;Acc:ZDB-GENE-040718-105]
zmp_ph205	9	22098691	22099400	22098691	-1	ENSDARG00000069827	CR391987.1	-
zmp_ph205	9	22116606	22117300	22116606	-1	ENSDARG00000069826	crygm2d15	crystallin, gamma M2d15 [Source:ZFIN;Acc:ZDB-GENE-040718-322]
zmp_ph205	9	22121722	22122400	22121762,22121722	-1	ENSDARG00000073750	crygm2d9	crystallin, gamma M2d9 [Source:ZFIN;Acc:ZDB-GENE-081105-81]
zmp_ph205	9	22128508	22128900	22128508	-1	ENSDARG00000069817	crygm2d8	crystallin, gamma M2d8 [Source:ZFIN;Acc:ZDB-GENE-040718-321]
zmp_ph205	9	22129301	22129600	22128508,22128514	-1	ENSDARG00000069817	crygm2d8	crystallin, gamma M2d8 [Source:ZFIN;Acc:ZDB-GENE-040718-321]
zmp_ph205	9	22134739	22135500	22134739	-1	ENSDARG00000116164	crygm2d8	crystallin, gamma M2d8 [Source:ZFIN;Acc:ZDB-GENE-040718-321]
zmp_ph205	9	22146469	22146900	22146542,22146469,22146489	-1	ENSDARG00000087301	crygm2d14	crystallin, gamma M2d14 [Source:ZFIN;Acc:ZDB-GENE-070822-20]
zmp_ph205	9	22147001	22147300	22146542	-1	ENSDARG00000087301	crygm2d14	crystallin, gamma M2d14 [Source:ZFIN;Acc:ZDB-GENE-070822-20]
zmp_ph205	9	22157473	22158200	22157473	-1	ENSDARG00000076790	crygm2d16	crystallin, gamma M2d16 [Source:ZFIN;Acc:ZDB-GENE-071004-53]
zmp_ph205	9	22181425	22181800	22181475,22181425	-1	ENSDARG00000073874	crygm2d6	crystallin, gamma M2d6 [Source:ZFIN;Acc:ZDB-GENE-040625-145]
zmp_ph205	9	22182001	22182200	22181475	-1	ENSDARG00000073874	crygm2d6	crystallin, gamma M2d6 [Source:ZFIN;Acc:ZDB-GENE-040625-145]
zmp_ph205	9	22187195	22187900	22187195	-1	ENSDARG00000109861	crygm2d17	crystallin, gamma M2d17 [Source:ZFIN;Acc:ZDB-GENE-070720-9]
zmp_ph205	9	22204778	22205400	22204778	-1	ENSDARG00000069801	crygm2d12	crystallin, gamma M2d12 [Source:ZFIN;Acc:ZDB-GENE-070822-19]
zmp_ph205	9	22212352	22212700	22212352	-1	ENSDARG00000091148	crygm2d20	crystallin, gamma M2d20 [Source:ZFIN;Acc:ZDB-GENE-070424-32]
zmp_ph205	9	22212801	22213000	22212352	-1	ENSDARG00000091148	crygm2d20	crystallin, gamma M2d20 [Source:ZFIN;Acc:ZDB-GENE-070424-32]
zmp_ph205	9	22231976	22232700	22231976	-1	ENSDARG00000069792	crygm2d5	crystallin, gamma M2d5 [Source:ZFIN;Acc:ZDB-GENE-060918-4]
zmp_ph205	9	22239038	22239800	22239122,22239038	-1	ENSDARG00000115701	crygm2d9	crystallin, gamma M2d9 [Source:ZFIN;Acc:ZDB-GENE-081105-81]
zmp_ph205	9	22244640	22245300	22244640	-1	ENSDARG00000087164	crygm2d4	crystallin, gamma M2d4 [Source:ZFIN;Acc:ZDB-GENE-060918-3]
zmp_ph205	9	22280691	22281400	22280691	-1	ENSDARG00000088823	crygm2d3	crystallin, gamma M2d3 [Source:ZFIN;Acc:ZDB-GENE-060918-2]
zmp_ph205	9	22298409	22299200	22298480	-1	ENSDARG00000086658	crygm2d21	crystallin, gamma M2d21 [Source:ZFIN;Acc:ZDB-GENE-081105-133]
zmp_ph205	9	22309923	22310700	22309981,22309986	-1	ENSDARG00000087765	crygm2d10	crystallin, gamma M2d10 [Source:ZFIN;Acc:ZDB-GENE-071004-96]
zmp_ph205	9	22317603	22318300	22317603	-1	ENSDARG00000086917	crygm2d2	crystallin, gamma M2d2 [Source:ZFIN;Acc:ZDB-GENE-060918-1]
zmp_ph205	9	22338656	22339400	22338656	-1	ENSDARG00000087324	crygm2d1	crystallin, gamma M2d1 [Source:ZFIN;Acc:ZDB-GENE-050522-395]
zmp_ph205	9	22344601	22344900	22344597	-1	ENSDARG00000078134	crygm2f	crystallin, gamma M2f [Source:ZFIN;Acc:ZDB-GENE-080220-17]
zmp_ph205	9	22351001	22351300	22350939	-1	ENSDARG00000041179	crygm5	crystallin, gamma M5 [Source:ZFIN;Acc:ZDB-GENE-041024-6]
zmp_ph205	9	23007601	23007938	23007938	1	ENSDARG00000010432	eaf2	ELL associated factor 2 [Source:ZFIN;Acc:ZDB-GENE-040625-179]
zmp_ph205	9	239401	239700	239740	1	ENSDARG00000103651	map3k12	mitogen-activated protein kinase kinase kinase 12 [Source:ZFIN;Acc:ZDB-GENE-040426-2436]
zmp_ph205	9	28268028	28268500	28268101	-1	ENSDARG00000093420	creb1b	cAMP responsive element binding protein 1b [Source:ZFIN;Acc:ZDB-GENE-050417-355]
zmp_ph205	9	2879801	2880000	2879765	-1	ENSDARG00000077620	cdca7a	cell division cycle associated 7a [Source:ZFIN;Acc:ZDB-GENE-050417-29]
zmp_ph205	9	32287024	32287600	32287031,32287024,32286608	-1	ENSDARG00000056160	hspd1	heat shock 60 protein 1 [Source:ZFIN;Acc:ZDB-GENE-021206-1]
zmp_ph205	9	32841001	32841300	32840926	-1	ENSDARG00000012609	hpx	hemopexin [Source:ZFIN;Acc:ZDB-GENE-030131-5773]
zmp_ph205	9	33061601	33061800	33061563	-1	ENSDARG00000069381	si:ch211-125e6.5	si:ch211-125e6.5 [Source:ZFIN;Acc:ZDB-GENE-070912-39]
zmp_ph205	9	42132401	42133078	42133110	1	ENSDARG00000054378	pcbp3	poly(rC) binding protein 3 [Source:ZFIN;Acc:ZDB-GENE-050522-157]
zmp_ph205	9	6372154	6372500	6372154	-1	ENSDARG00000056087	ecrg4a	esophageal cancer related gene 4a [Source:ZFIN;Acc:ZDB-GENE-050417-189]
zmp_ph205	9	7515865	7516200	7515865	-1	ENSDARG00000058656	desma	desmin a [Source:ZFIN;Acc:ZDB-GENE-980526-221]
zmp_ph205	9	8432617	8433000	8432584	-1	ENSDARG00000075282	irs2b	insulin receptor substrate 2b [Source:ZFIN;Acc:ZDB-GENE-081104-462]
zmp_ph205	9	9577744	9578400	9577744,9577749	-1	ENSDARG00000017803	gsk3b	glycogen synthase kinase 3 beta [Source:ZFIN;Acc:ZDB-GENE-990714-4]
zmp_ph25	9	11554362	11554700	11554362,11554405	-1	ENSDARG00000041925	cryba2b	crystallin, beta A2b [Source:ZFIN;Acc:ZDB-GENE-040718-324]
zmp_ph25	9	13352310	13353000	13352310	-1	ENSDARG00000060004	fzd7a	frizzled class receptor 7a [Source:ZFIN;Acc:ZDB-GENE-990415-223]
zmp_ph25	9	17089448	17089900	17089399	-1	ENSDARG00000001220	mycbp2	MYC binding protein 2 [Source:ZFIN;Acc:ZDB-GENE-030616-132]
zmp_ph25	9	22091157	22091500	22091157	-1	ENSDARG00000057460	crygm2d13	crystallin, gamma M2d13 [Source:ZFIN;Acc:ZDB-GENE-040718-105]
zmp_ph25	9	22098690	22099300	22098690	-1	ENSDARG00000069827	CR391987.1	-
zmp_ph25	9	22116606	22117400	22116606	-1	ENSDARG00000069826	crygm2d15	crystallin, gamma M2d15 [Source:ZFIN;Acc:ZDB-GENE-040718-322]
zmp_ph25	9	22121722	22122400	22121756,22121722	-1	ENSDARG00000073750	crygm2d9	crystallin, gamma M2d9 [Source:ZFIN;Acc:ZDB-GENE-081105-81]
zmp_ph25	9	22128508	22128900	22128508	-1	ENSDARG00000069817	crygm2d8	crystallin, gamma M2d8 [Source:ZFIN;Acc:ZDB-GENE-040718-321]
zmp_ph25	9	22134733	22135600	22134733	-1	ENSDARG00000116164	crygm2d8	crystallin, gamma M2d8 [Source:ZFIN;Acc:ZDB-GENE-040718-321]
zmp_ph25	9	22146469	22146900	22146542,22146489,22146469	-1	ENSDARG00000087301	crygm2d14	crystallin, gamma M2d14 [Source:ZFIN;Acc:ZDB-GENE-070822-20]
zmp_ph25	9	22157473	22158100	22157473	-1	ENSDARG00000076790	crygm2d16	crystallin, gamma M2d16 [Source:ZFIN;Acc:ZDB-GENE-071004-53]
zmp_ph25	9	22181475	22181800	22181475	-1	ENSDARG00000073874	crygm2d6	crystallin, gamma M2d6 [Source:ZFIN;Acc:ZDB-GENE-040625-145]
zmp_ph25	9	22187195	22187900	22187195	-1	ENSDARG00000109861	crygm2d17	crystallin, gamma M2d17 [Source:ZFIN;Acc:ZDB-GENE-070720-9]
zmp_ph25	9	22204779	22205500	22204779	-1	ENSDARG00000069801	crygm2d12	crystallin, gamma M2d12 [Source:ZFIN;Acc:ZDB-GENE-070822-19]
zmp_ph25	9	22212352	22212700	22212352	-1	ENSDARG00000091148	crygm2d20	crystallin, gamma M2d20 [Source:ZFIN;Acc:ZDB-GENE-070424-32]
zmp_ph25	9	22231976	22232700	22231976	-1	ENSDARG00000069792	crygm2d5	crystallin, gamma M2d5 [Source:ZFIN;Acc:ZDB-GENE-060918-4]
zmp_ph25	9	22239038	22239900	22239121,22239038	-1	ENSDARG00000115701	crygm2d9	crystallin, gamma M2d9 [Source:ZFIN;Acc:ZDB-GENE-081105-81]
zmp_ph25	9	22244640	22245400	22244640	-1	ENSDARG00000087164	crygm2d4	crystallin, gamma M2d4 [Source:ZFIN;Acc:ZDB-GENE-060918-3]
zmp_ph25	9	22280690	22281400	22280690	-1	ENSDARG00000088823	crygm2d3	crystallin, gamma M2d3 [Source:ZFIN;Acc:ZDB-GENE-060918-2]
zmp_ph25	9	22298409	22299200	22298483	-1	ENSDARG00000086658	crygm2d21	crystallin, gamma M2d21 [Source:ZFIN;Acc:ZDB-GENE-081105-133]
zmp_ph25	9	22309923	22310800	22309981	-1	ENSDARG00000087765	crygm2d10	crystallin, gamma M2d10 [Source:ZFIN;Acc:ZDB-GENE-071004-96]
zmp_ph25	9	22317604	22318400	22317604	-1	ENSDARG00000086917	crygm2d2	crystallin, gamma M2d2 [Source:ZFIN;Acc:ZDB-GENE-060918-1]
zmp_ph25	9	22338656	22339300	22338656	-1	ENSDARG00000087324	crygm2d1	crystallin, gamma M2d1 [Source:ZFIN;Acc:ZDB-GENE-050522-395]
zmp_ph25	9	22344701	22344900	22344597	-1	ENSDARG00000078134	crygm2f	crystallin, gamma M2f [Source:ZFIN;Acc:ZDB-GENE-080220-17]
zmp_ph25	9	30245634	30246000	30245639,30245634,30245644	-1	ENSDARG00000092870	BX936337.1	-
zmp_ph25	9	3231101	3231464	3231609	1	ENSDARG00000078386	dync1i2a	dynein, cytoplasmic 1, intermediate chain 2a [Source:ZFIN;Acc:ZDB-GENE-060929-1086]
zmp_ph25	9	32641034	32641900	32641044,32641052,32641034	-1	ENSDARG00000015088	dnajb11	DnaJ (Hsp40) homolog, subfamily B, member 11 [Source:ZFIN;Acc:ZDB-GENE-031113-9]
zmp_ph25	9	37233601	37233941	37234011	1	ENSDARG00000080918	RF00001	-
zmp_ph25	9	42132401	42133110	42133110	1	ENSDARG00000054378	pcbp3	poly(rC) binding protein 3 [Source:ZFIN;Acc:ZDB-GENE-050522-157]
zmp_ph25	9	42732996	42733900	42732996	-1	ENSDARG00000000563	ttn.1	titin, tandem duplicate 1 [Source:ZFIN;Acc:ZDB-GENE-030616-413]
zmp_ph25	9	42894850	42895600	42894850	-1	ENSDARG00000028213	ttn.2	titin, tandem duplicate 2 [Source:ZFIN;Acc:ZDB-GENE-030113-2]
zmp_ph25	9	47434899	47435300	47434899	-1	ENSDARG00000020845	tns1b	tensin 1b [Source:ZFIN;Acc:ZDB-GENE-030131-6933]
zmp_ph25	9	51271401	51271597	51271597	1	ENSDARG00000040907	gcgb	glucagon b [Source:ZFIN;Acc:ZDB-GENE-040712-2]
zmp_ph25	9	52378604	52378900	52378484,52378604	-1	ENSDARG00000086842	dap1b	death associated protein 1b [Source:ZFIN;Acc:ZDB-GENE-000511-4]
zmp_ph25	9	52401901	52402374	52402258	1	ENSDARG00000109678	dap1b	death associated protein 1b [Source:ZFIN;Acc:ZDB-GENE-000511-4]
zmp_ph25	9	56226200	56226400	56226200	-1	ENSDARG00000053365	rpl31	ribosomal protein L31 [Source:ZFIN;Acc:ZDB-GENE-060331-121]
zmp_ph25	9	7515866	7516300	7515866	-1	ENSDARG00000058656	desma	desmin a [Source:ZFIN;Acc:ZDB-GENE-980526-221]
zmp_ph44	9	11595996	11596600	11595996	-1	ENSDARG00000006314	itgav	integrin, alpha V [Source:ZFIN;Acc:ZDB-GENE-060616-382]
zmp_ph44	9	13728701	13728900	13728932,13728926	1	ENSDARG00000041735	tmem237a	transmembrane protein 237a [Source:ZFIN;Acc:ZDB-GENE-070402-3]
zmp_ph44	9	22091157	22091500	22091157	-1	ENSDARG00000057460	crygm2d13	crystallin, gamma M2d13 [Source:ZFIN;Acc:ZDB-GENE-040718-105]
zmp_ph44	9	22116606	22117200	22116606	-1	ENSDARG00000069826	crygm2d15	crystallin, gamma M2d15 [Source:ZFIN;Acc:ZDB-GENE-040718-322]
zmp_ph44	9	22121722	22122300	22121762,22121722	-1	ENSDARG00000073750	crygm2d9	crystallin, gamma M2d9 [Source:ZFIN;Acc:ZDB-GENE-081105-81]
zmp_ph44	9	22128508	22128900	22128508	-1	ENSDARG00000069817	crygm2d8	crystallin, gamma M2d8 [Source:ZFIN;Acc:ZDB-GENE-040718-321]
zmp_ph44	9	22134739	22135500	22134739	-1	ENSDARG00000116164	crygm2d8	crystallin, gamma M2d8 [Source:ZFIN;Acc:ZDB-GENE-040718-321]
zmp_ph44	9	22146469	22146900	22146542,22146499,22146489,22146469	-1	ENSDARG00000087301	crygm2d14	crystallin, gamma M2d14 [Source:ZFIN;Acc:ZDB-GENE-070822-20]
zmp_ph44	9	22157473	22158100	22157473	-1	ENSDARG00000076790	crygm2d16	crystallin, gamma M2d16 [Source:ZFIN;Acc:ZDB-GENE-071004-53]
zmp_ph44	9	22181423	22181800	22181475,22181423	-1	ENSDARG00000073874	crygm2d6	crystallin, gamma M2d6 [Source:ZFIN;Acc:ZDB-GENE-040625-145]
zmp_ph44	9	22187195	22187800	22187195	-1	ENSDARG00000109861	crygm2d17	crystallin, gamma M2d17 [Source:ZFIN;Acc:ZDB-GENE-070720-9]
zmp_ph44	9	22231976	22232600	22231976	-1	ENSDARG00000069792	crygm2d5	crystallin, gamma M2d5 [Source:ZFIN;Acc:ZDB-GENE-060918-4]
zmp_ph44	9	22239038	22239800	22239121,22239038	-1	ENSDARG00000115701	crygm2d9	crystallin, gamma M2d9 [Source:ZFIN;Acc:ZDB-GENE-081105-81]
zmp_ph44	9	22244640	22245300	22244640	-1	ENSDARG00000087164	crygm2d4	crystallin, gamma M2d4 [Source:ZFIN;Acc:ZDB-GENE-060918-3]
zmp_ph44	9	22280690	22281300	22280690	-1	ENSDARG00000088823	crygm2d3	crystallin, gamma M2d3 [Source:ZFIN;Acc:ZDB-GENE-060918-2]
zmp_ph44	9	22317603	22318300	22317603	-1	ENSDARG00000086917	crygm2d2	crystallin, gamma M2d2 [Source:ZFIN;Acc:ZDB-GENE-060918-1]
zmp_ph44	9	22338656	22339300	22338656	-1	ENSDARG00000087324	crygm2d1	crystallin, gamma M2d1 [Source:ZFIN;Acc:ZDB-GENE-050522-395]
zmp_ph44	9	22805139	22805900	22805139	-1	ENSDARG00000032630	neb	nebulin [Source:ZFIN;Acc:ZDB-GENE-041111-216]
zmp_ph44	9	24214260	24215000	24214660,24214671	-1	ENSDARG00000004692	nabp1a	nucleic acid binding protein 1a [Source:ZFIN;Acc:ZDB-GENE-041212-71]
zmp_ph44	9	25837301	25837749	25837749	1	ENSDARG00000062338	zeb2a	zinc finger E-box binding homeobox 2a [Source:ZFIN;Acc:ZDB-GENE-070912-553]
zmp_ph44	9	32287024	32287700	32287031,32287024	-1	ENSDARG00000056160	hspd1	heat shock 60 protein 1 [Source:ZFIN;Acc:ZDB-GENE-021206-1]
zmp_ph44	9	38994233	38994700	38994233,38994238	-1	ENSDARG00000014196	myl1	myosin, light chain 1, alkali; skeletal, fast [Source:ZFIN;Acc:ZDB-GENE-030131-8109]
zmp_ph44	9	42732996	42733500	42732996	-1	ENSDARG00000000563	ttn.1	titin, tandem duplicate 1 [Source:ZFIN;Acc:ZDB-GENE-030616-413]
zmp_ph44	9	42894849	42895400	42894849	-1	ENSDARG00000028213	ttn.2	titin, tandem duplicate 2 [Source:ZFIN;Acc:ZDB-GENE-030113-2]
zmp_ph44	9	44291723	44292400	44291723,44291728,44292004,44292019	-1	ENSDARG00000019566	neurod1	neuronal differentiation 1 [Source:ZFIN;Acc:ZDB-GENE-990415-172]
zmp_ph44	9	54679301	54679572	54679572	1	ENSDARG00000045958	egfl6	EGF-like-domain, multiple 6 [Source:ZFIN;Acc:ZDB-GENE-040718-157]
zmp_ph87	9	12445101	12445300	12444963	-1	ENSDARG00000070029	ehhadh	enoyl-CoA, hydratase/3-hydroxyacyl CoA dehydrogenase [Source:ZFIN;Acc:ZDB-GENE-040426-2581]
zmp_ph87	9	18720569	18720900	18720569	-1	ENSDARG00000038306	tsc22d1	TSC22 domain family, member 1 [Source:ZFIN;Acc:ZDB-GENE-030131-7785]
zmp_ph87	9	22017801	22018300	22018301	1	ENSDARG00000040738	zgc:153846	zgc:153846 [Source:ZFIN;Acc:ZDB-GENE-060929-898]
zmp_ph87	9	22022106	22022700	22022106	-1	ENSDARG00000117097	crygm2c	crystallin, gamma M2c [Source:ZFIN;Acc:ZDB-GENE-050516-11]
zmp_ph87	9	22091149	22091500	22091157,22091149	-1	ENSDARG00000057460	crygm2d13	crystallin, gamma M2d13 [Source:ZFIN;Acc:ZDB-GENE-040718-105]
zmp_ph87	9	22091601	22092000	22091163,22091149	-1	ENSDARG00000057460	crygm2d13	crystallin, gamma M2d13 [Source:ZFIN;Acc:ZDB-GENE-040718-105]
zmp_ph87	9	22098690	22099400	22098690	-1	ENSDARG00000069827	CR391987.1	-
zmp_ph87	9	22116606	22117400	22116606	-1	ENSDARG00000069826	crygm2d15	crystallin, gamma M2d15 [Source:ZFIN;Acc:ZDB-GENE-040718-322]
zmp_ph87	9	22121762	22122500	22121762	-1	ENSDARG00000073750	crygm2d9	crystallin, gamma M2d9 [Source:ZFIN;Acc:ZDB-GENE-081105-81]
zmp_ph87	9	22128508	22128900	22128508	-1	ENSDARG00000069817	crygm2d8	crystallin, gamma M2d8 [Source:ZFIN;Acc:ZDB-GENE-040718-321]
zmp_ph87	9	22129301	22129700	22128508	-1	ENSDARG00000069817	crygm2d8	crystallin, gamma M2d8 [Source:ZFIN;Acc:ZDB-GENE-040718-321]
zmp_ph87	9	22134733	22135600	22134733	-1	ENSDARG00000116164	crygm2d8	crystallin, gamma M2d8 [Source:ZFIN;Acc:ZDB-GENE-040718-321]
zmp_ph87	9	22146542	22146900	22146542,22146489,22146469	-1	ENSDARG00000087301	crygm2d14	crystallin, gamma M2d14 [Source:ZFIN;Acc:ZDB-GENE-070822-20]
zmp_ph87	9	22147001	22147300	22146542,22146489	-1	ENSDARG00000087301	crygm2d14	crystallin, gamma M2d14 [Source:ZFIN;Acc:ZDB-GENE-070822-20]
zmp_ph87	9	22157473	22158200	22157473	-1	ENSDARG00000076790	crygm2d16	crystallin, gamma M2d16 [Source:ZFIN;Acc:ZDB-GENE-071004-53]
zmp_ph87	9	22181475	22181800	22181475	-1	ENSDARG00000073874	crygm2d6	crystallin, gamma M2d6 [Source:ZFIN;Acc:ZDB-GENE-040625-145]
zmp_ph87	9	22181901	22182300	22181475	-1	ENSDARG00000073874	crygm2d6	crystallin, gamma M2d6 [Source:ZFIN;Acc:ZDB-GENE-040625-145]
zmp_ph87	9	22187195	22188000	22187195	-1	ENSDARG00000109861	crygm2d17	crystallin, gamma M2d17 [Source:ZFIN;Acc:ZDB-GENE-070720-9]
zmp_ph87	9	22204778	22205500	22204778	-1	ENSDARG00000069801	crygm2d12	crystallin, gamma M2d12 [Source:ZFIN;Acc:ZDB-GENE-070822-19]
zmp_ph87	9	22212352	22212700	22212352	-1	ENSDARG00000091148	crygm2d20	crystallin, gamma M2d20 [Source:ZFIN;Acc:ZDB-GENE-070424-32]
zmp_ph87	9	22212801	22213200	22212352	-1	ENSDARG00000091148	crygm2d20	crystallin, gamma M2d20 [Source:ZFIN;Acc:ZDB-GENE-070424-32]
zmp_ph87	9	22231976	22232700	22231976	-1	ENSDARG00000069792	crygm2d5	crystallin, gamma M2d5 [Source:ZFIN;Acc:ZDB-GENE-060918-4]
zmp_ph87	9	22239121	22239900	22239121,22239038	-1	ENSDARG00000115701	crygm2d9	crystallin, gamma M2d9 [Source:ZFIN;Acc:ZDB-GENE-081105-81]
zmp_ph87	9	22244640	22245400	22244640	-1	ENSDARG00000087164	crygm2d4	crystallin, gamma M2d4 [Source:ZFIN;Acc:ZDB-GENE-060918-3]
zmp_ph87	9	22280690	22281500	22280690	-1	ENSDARG00000088823	crygm2d3	crystallin, gamma M2d3 [Source:ZFIN;Acc:ZDB-GENE-060918-2]
zmp_ph87	9	22298409	22299200	22298483	-1	ENSDARG00000086658	crygm2d21	crystallin, gamma M2d21 [Source:ZFIN;Acc:ZDB-GENE-081105-133]
zmp_ph87	9	22309923	22310800	22309981,22309986	-1	ENSDARG00000087765	crygm2d10	crystallin, gamma M2d10 [Source:ZFIN;Acc:ZDB-GENE-071004-96]
zmp_ph87	9	22314501	22314800	22314433	-1	ENSDARG00000086917	crygm2d2	crystallin, gamma M2d2 [Source:ZFIN;Acc:ZDB-GENE-060918-1]
zmp_ph87	9	22317603	22318400	22317603	-1	ENSDARG00000086917	crygm2d2	crystallin, gamma M2d2 [Source:ZFIN;Acc:ZDB-GENE-060918-1]
zmp_ph87	9	22344601	22344900	22344597	-1	ENSDARG00000078134	crygm2f	crystallin, gamma M2f [Source:ZFIN;Acc:ZDB-GENE-080220-17]
zmp_ph87	9	46212703	46213200	46212668	-1	ENSDARG00000060671	lct	lactase [Source:ZFIN;Acc:ZDB-GENE-081104-434]
zmp_ph87	9	48674801	48675100	48674784	-1	ENSDARG00000017882	rdh1	retinol dehydrogenase 1 [Source:ZFIN;Acc:ZDB-GENE-030912-15]
zmp_ph87	9	48862103	48862500	48862188	-1	ENSDARG00000053583	cers6	ceramide synthase 6 [Source:ZFIN;Acc:ZDB-GENE-070522-1]
zmp_ph87	9	54165301	54165500	54165586	1	ENSDARG00000104832	TLR8	toll like receptor 8 [Source:HGNC Symbol;Acc:HGNC:15632]
zmp_ph87	9	55353801	55354100	55354117	1	ENSDARG00000077761	nlgn4b	neuroligin 4b [Source:ZFIN;Acc:ZDB-GENE-100309-1]
zmp_ph87	9	7044101	7044300	7044363	1	ENSDARG00000063352	inpp4aa	inositol polyphosphate-4-phosphatase type I Aa [Source:ZFIN;Acc:ZDB-GENE-060312-5]

## Sheet: chr9-cryg-sig_genes-counts
Numbers of gamma-crystallin differentially genes on chromosome 9 vs others
Expt	Num-gcrystallin	Num-others
zmp_ph114	13	13		Description of column names
zmp_ph184	25	10		Expt	Unique id for each experiment
zmp_ph204	11	4		Num-gcrystallin	Number of differentially expressed gamma-crystallin genes
zmp_ph205	29	26		Num-others	Number of differentially expressed genes that are not gamma-crystallins
zmp_ph25	20	17
zmp_ph44	15	11
zmp_ph87	26	10
