# Supplementary material for: Allele-specific gene expression can underlie altered transcript abundance in zebrafish mutants
Source: eLife. 2022 Feb 17;11:e72825. doi: 10.7554/eLife.72825 (PMC8884726; doi:10.7554/eLife.72825)
Supplement: Supplementary file 5. [file elife-72825-supp5.xlsx]

## Sheet: suppl-table4-expt-info
Summary information of DeTCT experiments
expt_name	expt	allele	gene_name	gene_id	mut_chr	stage	log2fc_gene	padj_gene	total_samples	samples_per_condition
capzb1_hi1858bTg	capzb1_hi1858bTg	hi1858bTg	capzb	ENSDARG00000100252	22	ZFS:0000033	-4.04071	3.30719e-30	24	12		Description of column names
dnmt8	dnmt8	sa3105/sa617	dnmt3aa	ENSDARG00000005394	20	ZFS:0000037	NA	NA	24	12		expt_name	unique id for each combination of mutant gene and experiment
ffr	ffr	p9emcf	vps51	ENSDARG00000062016	10	ZFS:0000038	-2.45756	5.20563e-06	23	11		expt	unique id for each experiment
gmds_p31erb	gmds_p31erb	p31erb	gmds	ENSDARG00000026629	20	ZFS:0000034	-0.0966732	NA	23	11		allele	Allele designation for mutant gene
hesx1	hesx1			ENSDARG00000060734	11	ZFS:0000020-ZFS:0000021	-6.32041	3.14872e-114	22	11		gene_name	name of the mutant gene
mitfa_w2	mitfa_w2	w2	mitfa	ENSDARG00000003732	6	ZFS:0000029-ZFS:0000031	-0.451081	0.99992	19	9		gene_id	Ensembl id of mutant gene
sox10_baz1	sox10_baz1	baz1	sox10	ENSDARG00000077467	3	ZFS:0000037	0.224209	0.999576	8	4		mut_chr	Chromosome containing the mutant gene
sox10_t3_1	sox10_t3_1	t3	sox10	ENSDARG00000077467	3	ZFS:0000029-ZFS:0000030	-2.13116	4.84854e-11	24	12		stage	Developmental stage of experiment
sox10_t3_2	sox10_t3_2	t3	sox10	ENSDARG00000077467	3	ZFS:0000031	-3.19206	3.14679e-40	24	12		log2fc_gene	Log2 fold change of mutant gene between mutants and siblings
sox10_t3_3	sox10_t3_3	t3	sox10	ENSDARG00000077467	3	ZFS:0000033	-3.51562	6.02444e-31	22	10		padj_gene	Adjusted p value for differential expression of mutant gene
sox10_t3_4	sox10_t3_4	t3	sox10	ENSDARG00000077467	3	ZFS:0000037	-3.01564	1.96938e-10	24	12		total_samples	Total number of samples in the experiment
sox10_t3_baz1_28hpf	sox10_t3_baz1_28hpf	baz1/t3	sox10	ENSDARG00000077467	3	ZFS:0000029-ZFS:0000030	-0.668885	0.0160719	24	12		samples_per_condition	Minimum number of samples per condition in the experiment
sox10_t3_baz1_36hpf	sox10_t3_baz1_36hpf	baz1/t3	sox10	ENSDARG00000077467	3	ZFS:0000031	-1.45714	1.18682e-13	24	12
tcf7l1a_m881	tcf7l1a_m881	m881	tcf7l1a	ENSDARG00000038159	10	ZFS:0000021	-2.48826	3.89449e-40	12	6
zmp_ph1	zmp_ph1	sa875	cep192	ENSDARG00000104831	16	ZFS:0000035	-0.728959	NA	10	5
zmp_ph2	zmp_ph2	sa1577	slc2a11b	ENSDARG00000063288	5	ZFS:0000035	-3.96907	2.51936e-27	10	5
zmp_ph3	zmp_ph3	sa1343	bmp7a	ENSDARG00000018260	11	ZFS:0000024	-5.57313	3.19962e-33	12	6
zmp_ph4	zmp_ph4	sa1376	polr1a	ENSDARG00000098375	14	ZFS:0000029-ZFS:0000030	-1.88015	3.16249e-08	8	4
zmp_ph5	zmp_ph5	sa1260	GREB1	ENSDARG00000070794	17	ZFS:0000036-ZFS:0000037	-1.15818	NA	6	3
zmp_ph6	zmp_ph6	sa1022	nol9	ENSDARG00000077751	23	ZFS:0000037	-1.5639	0.000868288	6	3
zmp_ph7	zmp_ph7	sa379	lamc1	ENSDARG00000036279	2	ZFS:0000030	-0.233109	0.46192	12	6
zmp_ph8	zmp_ph8	sa1311	PLD1	ENSDARG00000057125	24	ZFS:0000033	-0.422529	NA	12	6
zmp_ph9	zmp_ph9	sa1349	MDN1	ENSDARG00000008976	20	ZFS:0000036	-0.308409	0.644803	8	4
zmp_ph10	zmp_ph10	sa3219	tfip11	ENSDARG00000056932	23	ZFS:0000033-ZFS:0000034	0.203784	0.737926	6	3
zmp_ph11	zmp_ph11	sa126	ptf1a	ENSDARG00000014479	2	ZFS:0000037	-0.571631	NA	8	4
zmp_ph12	zmp_ph12	sa638	rpl13	ENSDARG00000099380	7	ZFS:0000035	-2.44899	0.00027493	8	4
zmp_ph13	zmp_ph13	sa787	ttna	ENSDARG00000028213	9	ZFS:0000033	-1.49003	6.08739e-17	10	5
zmp_ph14	zmp_ph14	sa2206	nup88	ENSDARG00000003235	5	ZFS:0000035-ZFS:0000036	-1.2119	0.00372279	12	6
zmp_ph15	zmp_ph15	sa1556	CYFIP2	ENSDARG00000036375	14	ZFS:0000037	-1.22856	0.000677469	6	3
zmp_ph16	zmp_ph16	sa1022	nol9	ENSDARG00000077751	23	ZFS:0000037	-1.31851	5.87023e-06	12	6
zmp_ph18	zmp_ph18	sa6050	cacna1c	ENSDARG00000008398	4	ZFS:0000035	-0.641316	0.050819	6	3
zmp_ph19	zmp_ph19	sa1029	ttna	ENSDARG00000028213	9	ZFS:0000035	-1.79999	1.10324e-38	8	4
zmp_ph20	zmp_ph20	sa674	las1l	ENSDARG00000062457	5	ZFS:0000037	-0.962977	NA	10	5
zmp_ph23	zmp_ph23	sa2597	top1l	ENSDARG00000070545	11	ZFS:0000033	-1.37347	8.30266e-11	6	3
zmp_ph25	zmp_ph25	sa1029	nol9	ENSDARG00000077751	23	ZFS:0000033	-0.116328	0.942188	10	5
zmp_ph27	zmp_ph27	sa1029/sa787	ttna	ENSDARG00000028213	9	ZFS:0000033	-1.76606	8.64407e-38	10	5
zmp_ph29	zmp_ph29	sa787	ttna	ENSDARG00000028213	9	ZFS:0000033	-1.27516	4.23192e-27	8	4
zmp_ph31	zmp_ph31	sa2206	nup88	ENSDARG00000003235	5	ZFS:0000036-ZFS:0000037	-1.01019	0.12271	12	6
zmp_ph32	zmp_ph32	sa6115	si:ch211-168k14.2	ENSDARG00000056191	9	ZFS:0000033-ZFS:0000034	NA	NA	12	6
zmp_ph35	zmp_ph35	sa7027/sa7028	vps16	ENSDARG00000059902	6	ZFS:0000033-ZFS:0000034	-2.03859	3.05642e-14	22	11
zmp_ph40	zmp_ph40	sa18758	smarce1	ENSDARG00000016871	3	ZFS:0000033-ZFS:0000034	-1.93984	2.22985e-12	19	8
zmp_ph42	zmp_ph42	sa9839	meis1	ENSDARG00000012078	13	ZFS:0000038	-0.185651	0.556781	20	9
zmp_ph44	zmp_ph44	sa5902	CDAN1	ENSDARG00000042261	17	ZFS:0000035	NA	NA	21	10
zmp_ph45	zmp_ph45	sa659	pla2g12b	ENSDARG00000015662	13	ZFS:0000035	-1.21242	NA	18	9
zmp_ph46	zmp_ph46	sa2042	GPAA1	ENSDARG00000074571	2	ZFS:0000037	0.479985	NA	24	12
zmp_ph48	zmp_ph48	sa2681	rps24	ENSDARG00000039347	13	ZFS:0000037	-1.82926	1.12648e-49	21	10
zmp_ph51	zmp_ph51	sa365	slc22a7b	ENSDARG00000056643	17	ZFS:0000033	NA	NA	24	12
zmp_ph54	zmp_ph54	sa6166	megf10	ENSDARG00000017229	10	ZFS:0000035	NA	NA	23	11
zmp_ph55	zmp_ph55	sa7108	dhx15	ENSDARG00000015392	7	ZFS:0000036	-2.03538	2.58988e-15	24	12
zmp_ph56	zmp_ph56	sa3636	copb1	ENSDARG00000056557	7	ZFS:0000029	-2.0321	7.33783e-05	22	10
zmp_ph58	zmp_ph58	sa6358	CLP1	ENSDARG00000063663	14	ZFS:0000033	-1.6938	0.0254336	24	12
zmp_ph69	zmp_ph69	sa5562	ttnb	ENSDARG00000000563	9	ZFS:0000037	-1.88788	1.64494e-25	24	12
zmp_ph71	zmp_ph71	sa18880	nod2	ENSDARG00000010756	7	ZFS:0000037	NA	NA	22	11
zmp_ph77	zmp_ph77	sa3896	glra1	ENSDARG00000012019	14	ZFS:0000037	-1.28875	0.00043692	23	11
zmp_ph78	zmp_ph78	sa6529	ryr1	ENSDARG00000023797	18	ZFS:0000034	-3.06101	2.94531e-33	22	10
zmp_ph80	zmp_ph80	sa23341	ryr1	ENSDARG00000023797	18	ZFS:0000033	-2.531	8.70091e-48	93	24
zmp_ph86	zmp_ph86	sa898	kdm2aa	ENSDARG00000059653	1	ZFS:0000037	-1.35403	6.88905e-05	18	6
zmp_ph87	zmp_ph87	sa3105	dnmt3aa	ENSDARG00000005394	20	ZFS:0000037	NA	NA	12	4
zmp_ph88	zmp_ph88	sa15458	dnmt3bb.1	ENSDARG00000036791	23	ZFS:0000037	0.266476	NA	23	11
zmp_ph90	zmp_ph90	sa14480	dnmt3ba	ENSDARG00000052402	8	ZFS:0000037	-0.485055	NA	23	11
zmp_ph97	zmp_ph97	sa9360	kdm2aa	ENSDARG00000059653	1	ZFS:0000037	-0.999537	NA	24	12
zmp_ph98	zmp_ph98	sa9360	kdm2aa	ENSDARG00000059653	1	ZFS:0000037	-1.38478	NA	22	10
zmp_ph108	zmp_ph108	sa898	kdm2aa	ENSDARG00000059653	1	ZFS:0000037	-1.30521	NA	24	12
zmp_ph111	zmp_ph111	sa898	kdm2aa	ENSDARG00000059653	1	ZFS:0000039	-0.92937	0.000182536	24	12
zmp_ph114	zmp_ph114	sa9360	kdm2aa	ENSDARG00000059653	1	ZFS:0000039	-1.1369	NA	24	12
zmp_ph150	zmp_ph150	baz1/t3	sox10	ENSDARG00000077467	3	ZFS:0000023	-0.491784	NA	48	12
zmp_ph151	zmp_ph151	w2	mitfa	ENSDARG00000003732	6	ZFS:0000023	NA	NA	24	12
zmp_ph152	zmp_ph152	baz1/t3	sox10	ENSDARG00000077467	3	ZFS:0000026	0.446439	NA	48	12
zmp_ph155_kitlga	zmp_ph155	tc244b	kitlga	ENSDARG00000070917	25	ZFS:0000029-ZFS:0000029	-0.260365	0.871527	16	6
zmp_ph155_mitfa	zmp_ph155	w2	mitfa	ENSDARG00000003732	6	ZFS:0000029-ZFS:0000029	1.12201	0.0278732	16	6
zmp_ph162	zmp_ph162	sa24445	tfap2a	ENSDARG00000059279	24	ZFS:0000023	-1.01026	1.67494e-15	24	12
zmp_ph163	zmp_ph163	w2	mitfa	ENSDARG00000003732	6	ZFS:0000029	-0.559086	0.665735	24	12
zmp_ph170	zmp_ph170	hu3332	bace2	ENSDARG00000044781	15	ZFS:0000029	NA	NA	24	12
zmp_ph172	zmp_ph172	hu3332	bace2	ENSDARG00000044781	15	ZFS:0000035	NA	NA	24	12
zmp_ph175	zmp_ph175	sa8962	pcna	ENSDARG00000054155	10	ZFS:0000028	-1.42756	2.03768e-21	24	12
zmp_ph180	zmp_ph180	sa24936	pax2a	ENSDARG00000028148	13	ZFS:0000024	-1.29368	4.92687e-11	24	12
zmp_ph181	zmp_ph181	sa24936	pax2a	ENSDARG00000028148	13	ZFS:0000029	-1.39345	0.00178804	24	12
zmp_ph184	zmp_ph184	fh158	ercc3	ENSDARG00000002402	6	ZFS:0000035	-2.30661	NA	24	11
zmp_ph185	zmp_ph185	sa10712	cax1	ENSDARG00000045601	4	ZFS:0000035	0.812567	NA	24	12
zmp_ph188	zmp_ph188	ta222a	dmd	ENSDARG00000008487	1	ZFS:0000033	-0.810502	0.497412	24	12
zmp_ph192_tfap2a	zmp_ph192	sa24445	tfap2a	ENSDARG00000059279	24	ZFS:0000023-ZFS:0000024	0.710263	0.0585448	20	10
zmp_ph192_tfap2c	zmp_ph192	sa18857	tfap2c	ENSDARG00000040606	6	ZFS:0000023-ZFS:0000024	0.920661	4.84306e-11	20	10
zmp_ph193	zmp_ph193	tm272a	lamb2	ENSDARG00000002084	23	ZFS:0000033	0.655968	0.0468749	24	12
zmp_ph194	zmp_ph194	tm272a	lamb2	ENSDARG00000002084	23	ZFS:0000037	1.28287	0.0163701	24	12
zmp_ph195	zmp_ph195	hu3530	tmod4	ENSDARG00000020890	16	ZFS:0000033	-4.70609	NA	24	12
zmp_ph196	zmp_ph196	ta222a	dmd	ENSDARG00000008487	1	ZFS:0000037	-1.90388	NA	22	10
zmp_ph197	zmp_ph197	ta253a	sne	ENSDARG00000056090	8	ZFS:0000033	-0.277654	0.839523	24	12
zmp_ph198	zmp_ph198	baz1/t3	sox10	ENSDARG00000077467	3	ZFS:0000029	1.17002	1.52351e-09	48	12
zmp_ph199	zmp_ph199	hu3530	tmod4	ENSDARG00000020890	16	ZFS:0000037	-4.71852	NA	24	12
zmp_ph200	zmp_ph200	ta253a	sne	ENSDARG00000056090	8	ZFS:0000037	0.00608702	0.996155	24	12
zmp_ph202	zmp_ph202	u45	hsp90aa1.1	ENSDARG00000010478	20	ZFS:0000029	1.16097	0.000123508	24	12
zmp_ph203	zmp_ph203	u45	hsp90aa1.1	ENSDARG00000010478	20	ZFS:0000033	4.8441	7.72035e-219	24	12
zmp_ph204	zmp_ph204	hu3072	dag1	ENSDARG00000016153	22	ZFS:0000033	-1.22195	0.000463718	23	11
zmp_ph205	zmp_ph205	hu3072	dag1	ENSDARG00000016153	22	ZFS:0000037	-0.881004	0.00026715	23	11
zmp_ph206	zmp_ph206	sa1343	bmp7a	ENSDARG00000018260	11	ZFS:0000023-ZFS:0000024	-5.09055	6.84649e-25	24	12
zmp_ph211	zmp_ph211	hu2849	neb	ENSDARG00000032630	9	ZFS:0000033	-2.81419	5.90558e-54	24	12
zmp_ph212	zmp_ph212	hu2849/ti209	neb/buf	ENSDARG00000032630	9	ZFS:0000033	-2.47093	5.7626e-50	24	12
zmp_ph213	zmp_ph213	hu2849	neb	ENSDARG00000032630	9	ZFS:0000037	-3.1091	5.18781e-107	24	12
zmp_ph214	zmp_ph214	hu2849/ti209	neb/buf	ENSDARG00000032630	9	ZFS:0000037	-3.31276	3.48303e-75	24	12
zmp_ph215	zmp_ph215	sa23341/sa6529	ryr1	ENSDARG00000023797	18	ZFS:0000029	1.68505	1.54522e-07	36	36
zmp_ph216	zmp_ph216	sa23341/sa6529	ryr1	ENSDARG00000023797	18	ZFS:0000023	NA	NA	36	36
zmp_ph219	zmp_ph219	sa23341/sa6529	ryr1	ENSDARG00000023797	18	ZFS:0000033	2.21194	5.43684e-16	36	36
zmp_ph220	zmp_ph220	sa23341/sa6529	ryr1	ENSDARG00000023797	18	ZFS:0000037	2.03247	1.75288e-16	36	36
zmp_ph231	zmp_ph231	sa18907	SRPK3	ENSDARG00000005916	8	ZFS:0000033	-0.142462	NA	24	12
zmp_ph232	zmp_ph232	sa18907	SRPK3	ENSDARG00000005916	8	ZFS:0000037	0.574107	0.0482349	24	12
zmp_ph234	zmp_ph234	sa25458	yap1	ENSDARG00000068401	18	ZFS:0000029	-2.04418	6.39682e-11	24	12
zmp_ph235	zmp_ph235	sa25458	yap1	ENSDARG00000068401	18	ZFS:0000026	-2.92427	9.46127e-35	24	12
zmp_ph238_tfap2a	zmp_ph238	sa24445	tfap2a	ENSDARG00000059279	24	ZFS:0000026	0.644222	0.0038106	17	7
zmp_ph238_tfap2c	zmp_ph238	sa18857	tfap2c	ENSDARG00000040606	6	ZFS:0000026	0.765257	5.09116e-06	20	10
zmp_ph239	zmp_ph239	sa25458	yap1	ENSDARG00000068401	18	ZFS:0000023	-2.25002	1.26975e-15	24	12
zmp_ph250_tfap2a	zmp_ph250	sa24445	tfap2a	ENSDARG00000059279	24	ZFS:0000029	0.683147	6.6928e-05	20	10
zmp_ph250_tfap2c	zmp_ph250	sa18857	tfap2c	ENSDARG00000040606	6	ZFS:0000029	0.597391	0.0904692	20	10
zmp_ph255	zmp_ph255	sa16375	ldlr	ENSDARG00000029476	3	ZFS:0000039	0.0679089	NA	24	12
zmp_ph258	zmp_ph258	baz1/t3	sox10	ENSDARG00000077467	3	ZFS:0000026	-0.0569125	0.998019	48	12
